# Supplementary material for: Tissue-Specific Transcriptome and Metabolome Analysis Reveals the Response Mechanism of Brassica napus to Waterlogging Stress
Source: MDPI journal article supplement (doi:10.3390/ijms24076015), 2023-03-23
Supplement: s1 [file s1]

Table S4 Dead seedling rate of 32 varieties or inbred lines of Brassica napus seedlings under waterlogging stress for 6 days and reoxygenation for 7 days

| Code | Material     | Death seedling | Average death rate(%) |
|------|--------------|----------------|-----------------------|
| 1    | G013         | 16             | 26.6                  |
| 2    | G036         | 23             | 38.3                  |
| 3    | G039         | 21             | 35                    |
| 4    | G051         | 18             | 30                    |
| 5    | G114         | 20             | 33.3                  |
| 5    | G179         | 3              | 5                     |
| 6    | G211         | 1              | 1.7                   |
| 7    | G218         | 60             | 100                   |
| 8    | G230         | 0              | 0                     |
| 9    | G233         | 58             | 96.7                  |
| 10   | G235         | 28             | 46.7                  |
| 11   | G264         | 17             | 28.3                  |
| 12   | G268         | 59             | 98.3                  |
| 13   | G344         | 20             | 33.3                  |
| 14   | G345         | 19             | 31.7                  |
| 15   | G346         | 16             | 26.7                  |
| 16   | G347         | 18             | 30                    |
| 17   | G02          | 48             | 80                    |
| 18   | Xiangyou15   | 8              | 13.3                  |
| 19   | WB06         | 17             | 28.3                  |
| 20   | 708          | 21             | 35                    |
| 21   | 710          | 16             | 26.7                  |
| 22   | G201         | 18             | 30                    |
| 23   | G209         | 36             | 60                    |
| 24   | G241         | 43             | 71.7                  |
| 25   | G250         | 9              | 15                    |
| 26   | G251         | 15             | 25                    |
| 27   | ZS11         | 11             | 18.3                  |
| 28   | Zheyongyou36 | 17             | 28.3                  |
| 29   | M004         | 22             | 36.7                  |
| 30   | 98C40        | 16             | 26.7                  |
| 31   | 104          | 13             | 21.7                  |
| 32   | 1035         | 16             | 26.7                  |
