# Supplementary material for: Tissue-Specific Transcriptome and Metabolome Analysis Reveals the Response Mechanism of Brassica napus to Waterlogging Stress
Source: MDPI journal article supplement (doi:10.3390/ijms24076015), 2023-03-23
Supplement: s1 [file s1]

Table S1 Primers used for RT-qPCR

| Gene name                        | Forward Primer (5'-3')   | Reverse Primer (5'-3') | Product Size(bp) | TM(°C) |
|----------------------------------|--------------------------|------------------------|------------------|--------|
| <i>CHI</i> (BnaA01G0107500ZS)    | CCCGACCAGAGAGTTGAG       | TGATGTAATGCGGCGTAA     | 154              | 53     |
| <i>DFR</i> (BnaC09G0215200ZS)    | AACGAAGTGATAAAACCA       | TCCAGCAGACGAAGTAAA     | 102              | 49     |
| <i>PDX2</i> (BnaA02T0098300ZS)   | TATCTCAGTGCCTCTTCT       | CTTCCTCTTGGATTTGTA     | 176              | 49     |
| <i>CER26L</i> (BnaC02G0495800ZS) | TACCCTCGTAGTCCATTC       | TGATCTCAGCCACTCATC     | 148              | 52     |
| <i>Actin2.1</i>                  | GGTTGGGATGGACCAGAAG<br>G | TCAGGAGCAATACGGAGC     | 180              | 55     |
