# Supplementary material for: Tissue-Specific Transcriptome and Metabolome Analysis Reveals the Response Mechanism of Brassica napus to Waterlogging Stress
Source: Int J Mol Sci. 2023 Mar 23;24(7):6015. doi: 10.3390/ijms24076015 (PMC10094381; doi:10.3390/ijms24076015)
Supplement: Supplementary file 1 [file ijms-24-06015-s001.zip]

Archive with 5 entries (5 files):
- Supplementary figures.pdf
- Table S1.pdf
- Table S2.xls
- Table S3.xlsx
- Table S4.pdf
