# Supplementary material for: Tissue-Specific Transcriptome and Metabolome Analysis Reveals the Response Mechanism of Brassica napus to Waterlogging Stress
Source: Int J Mol Sci. 2023 Mar 23;24(7):6015. doi: 10.3390/ijms24076015 (PMC10094381; doi:10.3390/ijms24076015)
Supplement: Supplementary file 1 [file ijms-24-06015-s001.zip › Table S2.xls]

Table S2. The detailed information of RNA sequencing.
Sample	Raw Reads	Clean Reads	Clean Base(G)	Error Rate(%)	Q20(%)	Q30(%)	GC Content(%)
G218WSL1	50378760	49606432	7.44	0.03	95.66	89.33	47.3
G218WSL2	49212478	47642262	7.15	0.03	95.95	89.94	47.5
G218WSL3	50396936	48844844	7.33	0.03	96.05	90.06	47.68
G218WSR1	47583234	46747470	7.01	0.03	95.86	89.77	47.73
G218WSR2	46304656	45095614	6.76	0.03	96.07	90.2	47.44
G218WSR3	49605290	46368198	6.96	0.03	96.48	91.08	47.27
G230WSL1	60332224	57116526	8.57	0.03	97	92.39	47.18
G230WSL2	48064202	45172326	6.78	0.03	96.28	90.64	47.22
G230WSL3	44746950	40663360	6.1	0.03	96.25	90.54	48.11
G230WSR1	48105036	46840008	7.03	0.03	96.03	90.1	47.69
G230WSR2	47097538	42253880	6.34	0.03	96.47	91.03	47.68
G230WSR3	47799170	45886150	6.88	0.03	96.12	90.27	47.62
G218CKL1	50627144	48752994	7.31	0.03	95.85	89.78	46.86
G218CKL2	44639756	43677180	6.55	0.03	95.56	89.23	46.69
G218CKL3	48057718	46715926	7.01	0.03	95.73	89.56	46.72
G218CKR1	47793170	46767816	7.02	0.03	95.87	89.88	46.87
G218CKR2	46416196	45224878	6.78	0.03	95.79	89.66	46.69
G218CKR3	47322686	46268546	6.94	0.03	95.93	89.96	46.77
G230CKL1	48159578	46495752	6.97	0.03	96.1	90.27	46.68
G230CKL2	47569436	44148454	6.62	0.03	96.31	90.72	46.48
G230CKL3	46948306	45088456	6.76	0.03	96	90.08	46.74
G230CKR1	46575760	45256374	6.79	0.03	95.72	89.52	46.76
G230CKR2	46567634	44009102	6.6	0.03	96.01	90.13	46.68
G230CKR3	47193152	44721536	6.71	0.03	96.13	90.34	46.85
