# Supplementary material for: Tissue-Specific Transcriptome and Metabolome Analysis Reveals the Response Mechanism of Brassica napus to Waterlogging Stress
Source: Int J Mol Sci. 2023 Mar 23;24(7):6015. doi: 10.3390/ijms24076015 (PMC10094381; doi:10.3390/ijms24076015)
Supplement: Supplementary file 1 [file ijms-24-06015-s001.zip › Table S3.xlsx]

## Sheet: Sheet
Table S3
Sheet	Explanation
Sheet 1	KEGG terms of DEGs in G218CKL_vs_G218WSL.
Sheet 2	KEGG terms of DEGs in G218CKL_vs_G230CKL.
Sheet 3	KEGG terms of DEGs in G218CKR_vs_G218WSR.
Sheet 4	KEGG terms of DEGs in G218CKR_vs_G230CKR.
Sheet 5	KEGG terms of DEGs in G218WSL_vs_G230WSL.
Sheet 6	KEGG terms of DEGs in G218WSR_vs_G230WSR.
Sheet 7	KEGG terms of DEGs in G230CKL_vs_G230WSL.
Sheet 8	KEGG terms of DEGs in G230CKR_vs_G230WSR.

## Sheet: Sheet1
#KEGG_pathway	ko_id	Cluster_frequency	Genome_frequency	P-value	Corrected_P-value	GeneID	KEGG Orthology	hyperlink
Phenylpropanoid biosynthesis	ko00940	385 out of 6277 6.13350326589135%	1067 out of 32833 3.24977918557549%	0	0	BnaA01G0011000ZS;BnaA01G0039500ZS;BnaA03G0543300ZS;BnaA05G0365200ZS;BnaA06G0447700ZS;BnaA08G0190100ZS;BnaA08G0190200ZS;BnaA08G0194900ZS;BnaA09G0596400ZS;BnaC01G0012900ZS;BnaC01G0045200ZS;BnaC03G0683500ZS;BnaC03G0683600ZS;BnaC03G0684000ZS;BnaC07G0519500ZS;BnaC07G0545000ZS;BnaC08G0294600ZS;BnaC08G0294700ZS;BnaC09G0091800ZS;BnaC09G0100900ZS;BnaC09G0106000ZS;BnaC09G0294900ZS;BnaC09G0312500ZS;BnaC09G0…	K00083+K00083+K00083+K00083+K00083+K00083+K00083+K00083+K00083+K00083+K00083+K00083+K00083+K00083+K00083+K00083+K00430+K00430+K00430+K00430+K00430+K00430+K00430+K00430+K00430+K00430+K00430+K00430+K00430+K00430+K00430+K00430+K00430+K00430+K00430+K00430+K00430+K00430+K00430+K00430+K00430+K00430+K00430+K00430+K00430+K00430+K00430+K00430+K00430+K00430+K00430+K00430+K00430+K00430+K00430+K00430+K00430+…	https:\\www.genome.jp\dbget-bin\www_bget?map00940
Carbon metabolism	ko01200	358 out of 6277 5.70336147841325%	1326 out of 32833 4.03861968141809%	0	0	BnaC09G0561100ZS;BnaA02G0032600ZS;BnaA10G0248000ZS;BnaC02G0036000ZS;BnaC03G0052300ZS;BnaC05G0568000ZS;BnaC05G0570800ZS;BnaC09G0024300ZS;BnaA08G0077100ZS;BnaA08G0221800ZS;BnaA09G0039000ZS;BnaC08G0109100ZS;BnaC09G0416100ZS;BnaA02G0111100ZS;BnaA03G0107100ZS;BnaA10G0138800ZS;BnaC02G0136200ZS;BnaC03G0123700ZS;BnaA01G0039900ZS;BnaA03G0358500ZS;BnaA03G0543100ZS;BnaA08G0136800ZS;BnaC01G0045700ZS;BnaC03G0…	K00026+K00026+K00026+K00026+K00029+K00033+K00033+K00036+K00036+K00036+K00036+K00036+K00051+K00051+K00051+K00051+K00051+K00051+K00058+K00058+K00058+K00058+K00058+K00058+K00058+K00058+K00121+K00121+K00121+K00121+K00121+K00122+K00131+K00131+K00131+K00131+K00134+K00134+K00134+K00134+K00232+K00232+K00235+K00261+K00261+K00261+K00261+K00281+K00281+K00382+K00382+K00600+K00600+K00600+K00600+K00600+K00600+…	https:\\www.genome.jp\dbget-bin\www_bget?map01200
Carotenoid biosynthesis	ko00906	81 out of 6277 1.29042536243428%	170 out of 32833 0.51777175402796%	0	0	BnaA05G0480100ZS;BnaC09G0492400ZS;BnaA02G0068500ZS;BnaA03G0073200ZS;BnaA10G0196500ZS;BnaC02G0078700ZS;BnaC03G0083000ZS;BnaA04G0055700ZS;BnaA08G0202200ZS;BnaC03G0667600ZS;BnaC04G0354500ZS;BnaC05G0498900ZS;BnaC05G0562400ZS;novel.2366;BnaC09G0402100ZS;BnaA03G0113600ZS;BnaA10G0128800ZS;BnaC03G0131000ZS;BnaC09G0200400ZS;Bnascaffold0026G0072300ZS;BnaA01G0192600ZS;BnaA09G0177600ZS;BnaA09G0675000ZS;BnaA0…	K00514+K02291+K02291+K02291+K02291+K02291+K02291+K02293+K02293+K02293+K02293+K06443+K06443+K06443+K06444+K06444+K06444+K06444+K09835+K09835+K09835+K09835+K09835+K09837+K09837+K09838+K09838+K09838+K09838+K09838+K09838+K09838+K09838+K09839+K09839+K09839+K09839+K09840+K09840+K09840+K09840+K09841+K09841+K09841+K09841+K09841+K09841+K09841+K09843+K09843+K09843+K09843+K09843+K09843+K09843+K09843+K09843+…	https:\\www.genome.jp\dbget-bin\www_bget?map00906
Metabolic pathways	ko01100	3180 out of 6277 50.6611438585311%	13753 out of 32833 41.8877349008619%	5.78844e-55	8.16169e-53	BnaC08G0450700ZS;BnaA02G0383900ZS;BnaA09G0597200ZS;BnaC02G0514000ZS;BnaA02G0400100ZS;BnaC02G0532200ZS;novel.1193;BnaC09G0341100ZS;BnaA10G0089600ZS;BnaC08G0019700ZS;BnaC08G0019800ZS;BnaA07G0285200ZS;BnaC06G0327000ZS;BnaC09G0509300ZS;BnaA02G0059400ZS;BnaA07G0170000ZS;BnaA10G0208700ZS;BnaC06G0160700ZS;BnaA02G0407800ZS;BnaA06G0293000ZS;BnaA10G0249100ZS;BnaC02G0541900ZS;BnaC03G0533400ZS;BnaA02G0221800…	K00001+K00001+K00001+K00001+K00002+K00002+K00002+K00008+K00008+K00008+K00008+K00010+K00010+K00012+K00012+K00012+K00012+K00012+K00020+K00020+K00020+K00020+K00020+K00021+K00021+K00021+K00026+K00026+K00026+K00026+K00029+K00033+K00033+K00036+K00036+K00036+K00036+K00036+K00051+K00051+K00051+K00051+K00051+K00051+K00052+K00053+K00053+K00053+K00053+K00053+K00058+K00058+K00058+K00058+K00058+K00058+K00058+…	https:\\www.genome.jp\dbget-bin\www_bget?map01100
Photosynthesis	ko00195	175 out of 6277 2.78795602995061%	312 out of 32833 0.950263454451314%	5.16766e-48	7.2864e-46	novel.6795;BnaA01G0055700ZS;BnaC01G0065300ZS;BnaC09G0310000ZS;BnaA02G0251000ZS;BnaA03G0251900ZS;BnaA09G0261600ZS;BnaC02G0336600ZS;BnaC03G0299300ZS;BnaC09G0277400ZS;BnaA02G0258900ZS;BnaA03G0263200ZS;BnaA09G0236300ZS;BnaC02G0351500ZS;BnaC03G0314400ZS;BnaA01G0064000ZS;BnaC01G0077000ZS;BnaC09G0016600ZS;BnaA03G0266700ZS;BnaA09G0032200ZS;BnaC03G0319100ZS;BnaC08G0259500ZS;BnaA06G0143300ZS;BnaA07G0132900…	K02108+K02109+K02109+K02113+K02113+K02113+K02113+K02113+K02113+K02115+K02115+K02115+K02115+K02115+K02115+K02634+K02634+K02636+K02636+K02636+K02636+K02638+K02638+K02638+K02638+K02638+K02638+K02638+K02638+K02638+K02639+K02639+K02639+K02639+K02639+K02639+K02639+K02639+K02639+K02639+K02639+K02639+K02639+K02639+K02641+K02641+K02641+K02641+K02641+K02641+K02641+K02641+K02641+K02692+K02692+K02693+K02693+…	https:\\www.genome.jp\dbget-bin\www_bget?map00195
Photosynthesis - antenna proteins	ko00196	67 out of 6277 1.06738888003823%	81 out of 32833 0.246703012213322%	5.45256e-35	7.68811e-33	BnaC08G0349200ZS;BnaA07G0190300ZS;BnaA09G0507700ZS;BnaC06G0191500ZS;BnaC08G0251300ZS;BnaA04G0010100ZS;BnaA07G0215800ZS;BnaA08G0253100ZS;BnaC04G0266800ZS;BnaC06G0230200ZS;BnaC09G0177400ZS;BnaA01G0279800ZS;BnaA09G0160400ZS;BnaC01G0342600ZS;BnaC04G0235100ZS;BnaA06G0175800ZS;BnaC03G0618700ZS;BnaA08G0048100ZS;BnaC08G0062900ZS;BnaA03G0165600ZS;BnaA04G0221200ZS;BnaA05G0100700ZS;BnaA05G0100800ZS;BnaA07G0…	K08907+K08907+K08907+K08907+K08908+K08908+K08908+K08908+K08908+K08908+K08909+K08909+K08909+K08909+K08909+K08910+K08910+K08911+K08911+K08912+K08912+K08912+K08912+K08912+K08912+K08912+K08912+K08912+K08912+K08912+K08912+K08912+K08912+K08912+K08912+K08913+K08913+K08913+K08913+K08913+K08913+K08913+K08913+K08914+K08914+K08914+K08915+K08915+K08915+K08915+K08915+K08915+K08916+K08916+K08916+K08916+K08916+…	https:\\www.genome.jp\dbget-bin\www_bget?map00196
Porphyrin and chlorophyll metabolism	ko00860	123 out of 6277 1.95953480962243%	217 out of 32833 0.66092041543569%	9.38374e-35	1.32311e-32	BnaA01G0167300ZS;BnaA03G0497900ZS;BnaA08G0167400ZS;BnaA08G0318400ZS;BnaA10G0020200ZS;BnaC01G0215200ZS;BnaC05G0022000ZS;BnaC07G0476300ZS;BnaC08G0006500ZS;Bnascaffold1706G0000200ZS;BnaA09G0709600ZS;BnaA10G0018800ZS;BnaC05G0021000ZS;BnaA05G0441000ZS;BnaA10G0010800ZS;BnaC05G0012700ZS;BnaC05G0502900ZS;BnaA04G0258300ZS;BnaC04G0575600ZS;novel.7814;BnaC06G0363000ZS;BnaC08G0421200ZS;BnaA09G0570800ZS;BnaC0…	K00218+K00218+K00218+K00218+K00218+K00218+K00218+K00218+K00218+K00228+K00228+K00228+K00228+K00231+K00231+K00231+K00231+K01599+K01599+K01599+K01698+K01719+K01719+K01749+K01749+K01749+K01749+K01749+K01749+K01772+K01772+K01845+K01845+K01845+K01845+K01845+K01845+K01885+K02492+K02492+K02492+K02492+K02492+K03403+K03403+K03404+K03404+K03405+K03405+K03405+K03405+K03405+K03405+K03428+K03428+K03428+K03428+…	https:\\www.genome.jp\dbget-bin\www_bget?map00860
Nitrogen metabolism	ko00910	76 out of 6277 1.21076947586427%	181 out of 32833 0.551274632229769%	8.85514e-13	1.24857e-10	BnaC09G0483800ZS;BnaC09G0483900ZS;BnaA10G0190000ZS;BnaC07G0339000ZS;BnaA03G0129800ZS;BnaC03G0150600ZS;BnaC09G0604900ZS;BnaA03G0201500ZS;BnaA10G0286200ZS;BnaC03G0238000ZS;BnaC04G0580500ZS;BnaC09G0108500ZS;BnaA03G0141900ZS;BnaA09G0107500ZS;BnaC03G0164800ZS;BnaA01G0013400ZS;BnaA01G0013500ZS;BnaC01G0015800ZS;BnaC01G0015900ZS;BnaA02G0068000ZS;BnaA04G0200300ZS;BnaC02G0078200ZS;BnaC04G0505800ZS;Bnascaff…	K00261+K00261+K00261+K00261+K00264+K00264+K00284+K00284+K00284+K00284+K00284+K00366+K00366+K00366+K00366+K01455+K01455+K01455+K01455+K01501+K01501+K01501+K01501+K01673+K01673+K01673+K01673+K01673+K01673+K01673+K01673+K01673+K01673+K01673+K01673+K01673+K01673+K01674+K01674+K01674+K01915+K01915+K01915+K01915+K01915+K01915+K01915+K01915+K01915+K01915+K01915+K01915+K01915+K01915+K01915+K01915+K01915+…	https:\\www.genome.jp\dbget-bin\www_bget?map00910
Carbon fixation in photosynthetic organisms	ko00710	160 out of 6277 2.54898837024056%	380 out of 32833 1.1573721560625%	1.18516e-12	1.67108e-10	BnaC09G0561100ZS;BnaA02G0032600ZS;BnaA10G0248000ZS;BnaC02G0036000ZS;BnaC03G0052300ZS;BnaC09G0416100ZS;BnaA02G0111100ZS;BnaA03G0107100ZS;BnaA10G0138800ZS;BnaC02G0136200ZS;BnaC03G0123700ZS;BnaA07G0230600ZS;BnaA09G0640500ZS;BnaC05G0135800ZS;BnaC06G0249000ZS;BnaC08G0398700ZS;BnaA04G0013900ZS;BnaA05G0051500ZS;BnaA09G0552000ZS;BnaC04G0057500ZS;BnaC04G0274300ZS;novel.6774;BnaA05G0328400ZS;BnaA08G0076000…	K00026+K00026+K00026+K00026+K00029+K00051+K00051+K00051+K00051+K00051+K00051+K00134+K00134+K00134+K00134+K00615+K00615+K00615+K00615+K00615+K00615+K00814+K00855+K00855+K00855+K00855+K00855+K00855+K00927+K00927+K00927+K00927+K00927+K00927+K00927+K00927+K00927+K00927+K00927+K00927+K01006+K01006+K01006+K01006+K01100+K01100+K01100+K01100+K01100+K01100+K01595+K01595+K01595+K01595+K01595+K01595+K01595+…	https:\\www.genome.jp\dbget-bin\www_bget?map00710
Glyoxylate and dicarboxylate metabolism	ko00630	151 out of 6277 2.40560777441453%	449 out of 32833 1.36752657387385%	3.63476e-12	5.12501e-10	BnaC09G0561100ZS;BnaA02G0032600ZS;BnaA10G0248000ZS;BnaC02G0036000ZS;BnaC02G0065000ZS;BnaA01G0048600ZS;BnaC01G0055600ZS;BnaC09G0604900ZS;BnaA03G0201500ZS;BnaA10G0286200ZS;BnaC03G0238000ZS;BnaC04G0580500ZS;BnaC03G0419600ZS;BnaC06G0024800ZS;BnaA01G0011100ZS;BnaA07G0264400ZS;BnaA07G0325000ZS;BnaA08G0052000ZS;BnaA08G0189700ZS;BnaC01G0013200ZS;BnaC01G0062600ZS;BnaC03G0684400ZS;BnaC08G0212500ZS;BnaC08G0…	K00026+K00026+K00026+K00026+K00122+K00281+K00281+K00284+K00284+K00284+K00284+K00284+K00382+K00382+K00600+K00600+K00600+K00600+K00600+K00600+K00600+K00600+K00605+K00605+K00605+K00605+K00605+K00626+K00830+K00830+K00830+K00830+K01433+K01433+K01433+K01455+K01455+K01455+K01455+K01601+K01601+K01601+K01601+K01602+K01602+K01602+K01602+K01602+K01602+K01602+K01602+K01602+K01602+K01602+K01602+K01602+K01637+…	https:\\www.genome.jp\dbget-bin\www_bget?map00630
Biosynthesis of secondary metabolites	ko01110	1982 out of 6277 31.5755934363549%	7179 out of 32833 21.8651966009807%	4.96501e-11	7.00066e-09	BnaC08G0450700ZS;BnaA02G0383900ZS;BnaA09G0597200ZS;BnaC02G0514000ZS;BnaA02G0400100ZS;BnaC02G0532200ZS;novel.1193;BnaA04G0259700ZS;BnaA05G0025400ZS;BnaC04G0027000ZS;BnaC04G0576800ZS;BnaA07G0285200ZS;BnaC06G0327000ZS;BnaA02G0221800ZS;BnaC02G0298800ZS;BnaC06G0425300ZS;BnaC09G0561100ZS;BnaA02G0032600ZS;BnaA10G0248000ZS;BnaC02G0036000ZS;BnaC05G0568000ZS;BnaC05G0570800ZS;BnaC09G0024300ZS;BnaA08G0077100…	K00001+K00001+K00001+K00001+K00002+K00002+K00002+K00006+K00006+K00006+K00006+K00010+K00010+K00021+K00021+K00021+K00026+K00026+K00026+K00026+K00033+K00033+K00036+K00036+K00036+K00036+K00036+K00052+K00053+K00053+K00053+K00053+K00053+K00058+K00058+K00058+K00058+K00058+K00058+K00058+K00058+K00059+K00059+K00059+K00083+K00083+K00083+K00083+K00083+K00083+K00083+K00083+K00083+K00083+K00083+K00083+K00083+…	https:\\www.genome.jp\dbget-bin\www_bget?map01110
Cutin, suberine and wax biosynthesis	ko00073	98 out of 6277 1.56125537677234%	288 out of 32833 0.877166265647367%	1.40877e-09	1.98637e-07	BnaA01G0042600ZS;BnaA03G0095100ZS;BnaA06G0188700ZS;BnaA06G0257000ZS;BnaA08G0139800ZS;BnaC01G0048500ZS;BnaC02G0110800ZS;BnaC03G0107600ZS;BnaC03G0579500ZS;BnaC03G0597600ZS;BnaC03G0752500ZS;BnaC04G0306000ZS;BnaA09G0717100ZS;BnaA10G0004100ZS;BnaC02G0332800ZS;BnaC05G0006000ZS;BnaC08G0291200ZS;BnaA01G0141100ZS;BnaA02G0156800ZS;BnaA03G0529500ZS;BnaA04G0122700ZS;BnaA04G0251000ZS;BnaA06G0165100ZS;BnaA06G0…	K13356+K13356+K13356+K13356+K13356+K13356+K13356+K13356+K13356+K13356+K13356+K13356+K15398+K15398+K15398+K15398+K15400+K15400+K15400+K15400+K15400+K15400+K15400+K15400+K15400+K15400+K15400+K15400+K15400+K15400+K15400+K15400+K15400+K15400+K15400+K15400+K15400+K15400+K15401+K15401+K15401+K15401+K15402+K15402+K15402+K15402+K15402+K15403+K15403+K15404+K15404+K15404+K15404+K15404+K15404+K15404+K15404+…	https:\\www.genome.jp\dbget-bin\www_bget?map00073
Flavonoid biosynthesis	ko00941	82 out of 6277 1.30635653974829%	233 out of 32833 0.709651874638321%	5.20861e-09	7.34413e-07	BnaC08G0314600ZS;BnaA09G0476900ZS;BnaA03G0147300ZS;BnaA03G0147400ZS;BnaA05G0132000ZS;BnaC03G0171900ZS;BnaC04G0174600ZS;BnaC04G0500500ZS;BnaA02G0170100ZS;BnaA03G0541500ZS;BnaA08G0089300ZS;BnaA08G0138300ZS;BnaC02G0218400ZS;BnaC07G0517700ZS;BnaC08G0127300ZS;BnaC08G0127400ZS;novel.4489;novel.5122;novel.5805;novel.10077;novel.1084;BnaC09G0593800ZS;BnaA05G0070600ZS;BnaA06G0011300ZS;BnaA10G0276200ZS;Bna…	K00475+K00475+K00487+K00487+K00487+K00487+K00487+K00487+K00588+K00588+K00588+K00588+K00588+K00588+K00588+K00588+K00660+K00660+K00660+K00660+K00660+K01859+K01859+K01859+K01859+K01859+K05277+K05277+K05277+K05277+K05278+K05278+K05278+K05278+K05278+K05278+K05278+K05278+K05278+K05278+K05278+K05278+K05278+K05280+K05280+K08243+K08243+K08243+K09754+K13065+K13065+K13065+K13065+K13065+K13065+K13065+K13065+…	https:\\www.genome.jp\dbget-bin\www_bget?map00941
MAPK signaling pathway - plant	ko04016	448 out of 6277 7.13716743667357%	1847 out of 32833 5.62543782170377%	1.12379e-08	1.58455e-06	BnaA06G0285000ZS;BnaA09G0083500ZS;BnaC01G0173400ZS;BnaC01G0173500ZS;BnaC03G0544700ZS;BnaA02G0351200ZS;BnaA03G0050100ZS;BnaA04G0175000ZS;BnaA06G0256000ZS;BnaA06G0298200ZS;BnaC03G0058000ZS;BnaC04G0392100ZS;BnaC07G0317400ZS;BnaC08G0260800ZS;Bnascaffold0025G0038400ZS;BnaA01G0032600ZS;BnaA02G0147200ZS;BnaA03G0547900ZS;BnaA06G0144600ZS;BnaA08G0131200ZS;BnaA08G0247000ZS;BnaC01G0037600ZS;BnaC02G0188700ZS…	K00940+K00940+K00940+K00940+K00940+K02183+K02183+K02183+K02183+K02183+K02183+K02183+K02183+K03781+K03781+K03781+K03781+K03781+K03781+K03781+K03781+K03781+K03781+K03781+K03781+K13413+K13413+K13413+K13413+K13413+K13413+K13413+K13413+K13413+K13413+K13413+K13413+K13413+K13413+K13413+K13413+K13413+K13413+K13413+K13413+K13413+K13413+K13413+K13413+K13413+K13413+K13413+K13413+K13413+K13413+K13413+K13413+…	https:\\www.genome.jp\dbget-bin\www_bget?map04016
Starch and sucrose metabolism	ko00500	337 out of 6277 5.36880675481918%	1342 out of 32833 4.08735114062072%	2.07201e-08	2.92154e-06	BnaA06G0179000ZS;BnaA06G0371600ZS;BnaC03G0614900ZS;BnaC07G0320200ZS;BnaC08G0280700ZS;BnaC09G0008900ZS;BnaC09G0079300ZS;BnaC09G0159900ZS;BnaA03G0090400ZS;BnaA05G0483600ZS;BnaA07G0335800ZS;BnaA09G0024200ZS;BnaA10G0171200ZS;BnaC02G0270600ZS;BnaC03G0102700ZS;BnaC03G0668000ZS;BnaC03G0689600ZS;BnaC07G0249200ZS;novel.4203;novel.5090;novel.5595;novel.5801;novel.1304;novel.710;novel.8836;novel.9101;novel.…	K00688+K00688+K00688+K00688+K00695+K00695+K00695+K00695+K00695+K00695+K00695+K00695+K00695+K00695+K00695+K00695+K00695+K00695+K00695+K00695+K00695+K00695+K00695+K00695+K00695+K00695+K00695+K00695+K00696+K00696+K00696+K00696+K00696+K00696+K00696+K00696+K00696+K00696+K00700+K00700+K00700+K00700+K00703+K00703+K00703+K00703+K00703+K00703+K00703+K00705+K00705+K00706+K00706+K00706+K00750+K00844+K00844+…	https:\\www.genome.jp\dbget-bin\www_bget?map00500
Ubiquinone and other terpenoid-quinone biosynthesis	ko00130	77 out of 6277 1.22670065317827%	224 out of 32833 0.682240428836841%	4.7285e-08	6.66719e-06	BnaA09G0676100ZS;BnaA10G0046800ZS;BnaC05G0047700ZS;BnaA03G0147300ZS;BnaA03G0147400ZS;BnaA05G0132000ZS;BnaC03G0171900ZS;BnaC04G0174600ZS;BnaC04G0500500ZS;BnaC08G0458300ZS;BnaA02G0135900ZS;BnaA03G0238000ZS;BnaA03G0473600ZS;BnaA05G0144400ZS;BnaA09G0604200ZS;BnaC02G0171200ZS;BnaC06G0151600ZS;BnaC07G0451900ZS;novel.1470;novel.8853;BnaC09G0186400ZS;BnaA09G0166800ZS;BnaC09G0137200ZS;BnaC09G0271300ZS;Bna…	K00457+K00457+K00457+K00487+K00487+K00487+K00487+K00487+K00487+K00815+K00815+K00815+K00815+K00815+K00815+K00815+K00815+K00815+K00815+K00815+K01661+K01661+K01904+K01904+K01904+K01904+K01904+K01904+K01904+K01904+K01904+K01904+K01904+K01904+K01904+K01904+K01904+K01904+K02552+K02552+K02552+K02552+K03809+K03809+K03809+K03809+K03809+K03809+K05928+K05928+K05928+K05928+K09833+K09833+K09834+K09834+K09834+…	https:\\www.genome.jp\dbget-bin\www_bget?map00130
Cyanoamino acid metabolism	ko00460	104 out of 6277 1.65684244065636%	331 out of 32833 1.00813206225444%	5.40226e-08	7.61719e-06	BnaA01G0011100ZS;BnaA07G0264400ZS;BnaA07G0325000ZS;BnaA08G0052000ZS;BnaA08G0189700ZS;BnaC01G0013200ZS;BnaC01G0062600ZS;BnaC03G0684400ZS;BnaC08G0393600ZS;BnaC08G0393700ZS;BnaC08G0415800ZS;BnaC09G0579200ZS;BnaC09G0579400ZS;Bnascaffold0027G0010300ZS;Bnascaffold2543G0000100ZS;BnaA01G0367800ZS;BnaA03G0105400ZS;BnaA03G0105500ZS;BnaA03G0228700ZS;BnaA04G0005700ZS;BnaA04G0017900ZS;BnaA04G0018000ZS;BnaA04G…	K00600+K00600+K00600+K00600+K00600+K00600+K00600+K00600+K01188+K01188+K01188+K01188+K01188+K01188+K01188+K01188+K01188+K01188+K01188+K01188+K01188+K01188+K01188+K01188+K01188+K01188+K01188+K01188+K01188+K01188+K01188+K01188+K01188+K01188+K01188+K01188+K01188+K01188+K01188+K01188+K01188+K01188+K01188+K01188+K01188+K01188+K01188+K01188+K01188+K01188+K01188+K01188+K01188+K01188+K01188+K01188+K01188+…	https:\\www.genome.jp\dbget-bin\www_bget?map00460
Pentose phosphate pathway	ko00030	101 out of 6277 1.60904890871435%	326 out of 32833 0.992903481253617%	1.78193e-07	2.51252e-05	BnaC05G0568000ZS;BnaC05G0570800ZS;BnaC09G0024300ZS;BnaA08G0077100ZS;BnaA08G0221800ZS;BnaA09G0039000ZS;BnaC08G0109100ZS;BnaC08G0433500ZS;BnaA04G0160500ZS;BnaA09G0581000ZS;BnaC04G0455800ZS;BnaC08G0398700ZS;BnaA04G0013900ZS;BnaA05G0051500ZS;BnaA09G0552000ZS;BnaC04G0057500ZS;BnaC04G0274300ZS;BnaC09G0526900ZS;Bnascaffold0026G0042700ZS;BnaA02G0048000ZS;BnaA10G0222100ZS;BnaC02G0055400ZS;BnaA01G0050200ZS…	K00033+K00033+K00036+K00036+K00036+K00036+K00036+K00131+K00131+K00131+K00131+K00615+K00615+K00615+K00615+K00615+K00615+K00616+K00616+K00616+K00616+K00616+K00850+K00850+K00850+K00850+K00850+K00850+K00850+K00850+K00850+K00850+K00850+K00850+K00850+K00850+K00850+K00850+K00850+K00850+K00850+K00850+K00850+K00895+K00895+K00895+K00895+K00895+K00895+K00948+K01057+K01057+K01057+K01057+K01623+K01623+K01623+…	https:\\www.genome.jp\dbget-bin\www_bget?map00030
Riboflavin metabolism	ko00740	47 out of 6277 0.748765333758165%	120 out of 32833 0.365485944019736%	2.67908e-07	3.7775e-05	BnaC08G0352200ZS;BnaC08G0406900ZS;BnaA01G0076300ZS;BnaA01G0076400ZS;BnaA03G0511800ZS;BnaA05G0015100ZS;BnaA06G0069000ZS;BnaA07G0217300ZS;BnaA08G0158400ZS;BnaA08G0287300ZS;BnaA09G0510700ZS;BnaC01G0091800ZS;BnaC01G0091900ZS;BnaC03G0778100ZS;BnaC04G0015500ZS;novel.4159;novel.8160;BnaC03G0725200ZS;BnaC08G0230600ZS;BnaA06G0405600ZS;BnaA06G0405700ZS;BnaA08G0270600ZS;BnaC02G0430300ZS;BnaC07G0273900ZS;Bna…	K01513+K01513+K01513+K01513+K01513+K01513+K01513+K01513+K01513+K01513+K01513+K01513+K01513+K01513+K01513+K01513+K01513+K11752+K14379+K14379+K14379+K14379+K14379+K14379+K14379+K14652+K14652+K14652+K14652+K14652+K20860+K20860+K20884+K20884+K20884+K20884+K20884+K20884+K20884+K20884+K22912+K22912+K22912+K22912+K22949+K22949+K22949	https:\\www.genome.jp\dbget-bin\www_bget?map00740
Stilbenoid, diarylheptanoid and gingerol biosynthesis	ko00945	44 out of 6277 0.700971801816154%	113 out of 32833 0.344165930618585%	7.68114e-07	0.000108304	BnaA03G0147300ZS;BnaA03G0147400ZS;BnaA05G0132000ZS;BnaC03G0171900ZS;BnaC04G0174600ZS;BnaC04G0500500ZS;BnaA02G0170100ZS;BnaA03G0541500ZS;BnaA08G0089300ZS;BnaA08G0138300ZS;BnaC02G0218400ZS;BnaC07G0517700ZS;BnaC08G0127300ZS;BnaC08G0127400ZS;BnaC04G0578600ZS;BnaC08G0441800ZS;BnaC09G0614200ZS;BnaA01G0197600ZS;BnaA02G0009800ZS;BnaA02G0056700ZS;BnaA02G0276300ZS;BnaA02G0369900ZS;BnaA03G0426600ZS;BnaA04G0…	K00487+K00487+K00487+K00487+K00487+K00487+K00588+K00588+K00588+K00588+K00588+K00588+K00588+K00588+K09754+K13065+K13065+K13065+K13065+K13065+K13065+K13065+K13065+K13065+K13065+K13065+K13065+K13065+K13065+K13065+K13065+K13065+K13065+K13065+K13065+K13065+K13065+K13065+K13065+K13065+K13065+K13065+K13065+K13065	https:\\www.genome.jp\dbget-bin\www_bget?map00945
Glycine, serine and threonine metabolism	ko00260	128 out of 6277 2.03919069619245%	450 out of 32833 1.37057229007401%	9.26231e-07	0.000130599	BnaA01G0039900ZS;BnaA03G0358500ZS;BnaA03G0543100ZS;BnaA08G0136800ZS;BnaC01G0045700ZS;BnaC03G0436800ZS;BnaC03G0747700ZS;BnaC07G0519100ZS;BnaC08G0217900ZS;BnaC08G0359400ZS;BnaC08G0359500ZS;BnaC08G0359600ZS;BnaA08G0278500ZS;BnaA09G0516900ZS;BnaA09G0517000ZS;BnaA09G0517100ZS;BnaC06G0131700ZS;BnaA06G0098000ZS;BnaA01G0200500ZS;BnaA02G0263300ZS;BnaA02G0263500ZS;BnaA03G0553300ZS;BnaA04G0296800ZS;BnaA07G0…	K00058+K00058+K00058+K00058+K00058+K00058+K00058+K00058+K00108+K00108+K00108+K00108+K00108+K00108+K00108+K00108+K00130+K00133+K00276+K00276+K00276+K00276+K00276+K00276+K00276+K00276+K00276+K00276+K00276+K00276+K00276+K00276+K00281+K00281+K00382+K00382+K00499+K00499+K00499+K00600+K00600+K00600+K00600+K00600+K00600+K00600+K00600+K00605+K00605+K00605+K00605+K00605+K00827+K00827+K00827+K00830+K00830+…	https:\\www.genome.jp\dbget-bin\www_bget?map00260
Glutathione metabolism	ko00480	134 out of 6277 2.13477776007647%	479 out of 32833 1.45889805987878%	1.39707e-06	0.000196987	BnaC05G0568000ZS;BnaC05G0570800ZS;BnaC09G0024300ZS;BnaA08G0077100ZS;BnaA08G0221800ZS;BnaA09G0039000ZS;BnaC08G0109100ZS;BnaC08G0346500ZS;BnaC08G0428600ZS;BnaA02G0266400ZS;BnaA03G0529000ZS;BnaA07G0222500ZS;BnaA09G0015300ZS;BnaA09G0577200ZS;BnaC04G0257400ZS;BnaC06G0239400ZS;BnaC07G0506700ZS;BnaA01G0025800ZS;BnaA03G0249400ZS;BnaA03G0399300ZS;BnaA03G0531500ZS;BnaA03G0547400ZS;BnaA06G0320900ZS;BnaA07G0…	K00033+K00033+K00036+K00036+K00036+K00036+K00036+K00383+K00432+K00432+K00432+K00432+K00432+K00432+K00432+K00432+K00432+K00434+K00434+K00434+K00434+K00434+K00434+K00434+K00434+K00434+K00434+K00434+K00434+K00797+K00799+K00799+K00799+K00799+K00799+K00799+K00799+K00799+K00799+K00799+K00799+K00799+K00799+K00799+K00799+K00799+K00799+K00799+K00799+K00799+K00799+K00799+K00799+K00799+K00799+K00799+K00799+…	https:\\www.genome.jp\dbget-bin\www_bget?map00480
Plant-pathogen interaction	ko04626	621 out of 6277 9.89326111199618%	2759 out of 32833 8.40313099625377%	1.90025e-06	0.000267935	BnaA01G0189800ZS;BnaC01G0240700ZS;BnaA02G0351200ZS;BnaA03G0050100ZS;BnaA04G0175000ZS;BnaA06G0256000ZS;BnaA06G0298200ZS;BnaC03G0058000ZS;BnaC04G0392100ZS;BnaC07G0317400ZS;Bnascaffold0026G0068100ZS;BnaA01G0109200ZS;BnaA03G0457600ZS;BnaA06G0434400ZS;BnaA07G0051600ZS;BnaC01G0132800ZS;BnaC03G0718900ZS;BnaC07G0232700ZS;BnaC07G0433400ZS;novel.1974;novel.2439;BnaC09G0274900ZS;BnaC02G0160100ZS;BnaA03G0115…	K01373+K01373+K02183+K02183+K02183+K02183+K02183+K02183+K02183+K02183+K02358+K02358+K02358+K02358+K02358+K02358+K02358+K02358+K02358+K02358+K02358+K04079+K04079+K04368+K04368+K05391+K05391+K05391+K05391+K05391+K05391+K05391+K05391+K05391+K05391+K05391+K05391+K05391+K05391+K05391+K05391+K05391+K05391+K05391+K05391+K05391+K05391+K05391+K05391+K05391+K05391+K05391+K05391+K05391+K05391+K05391+K05391+…	https:\\www.genome.jp\dbget-bin\www_bget?map04626
Circadian rhythm - plant	ko04712	117 out of 6277 1.86394774573841%	414 out of 32833 1.26092650686809%	3.72076e-06	0.000524627	novel.4489;novel.5122;novel.5805;novel.10077;novel.1084;BnaA01G0053800ZS;BnaA01G0424700ZS;BnaA04G0266600ZS;BnaA05G0027200ZS;BnaA05G0027300ZS;BnaA05G0453300ZS;BnaA07G0225700ZS;BnaC04G0583700ZS;BnaC05G0511400ZS;BnaC07G0256800ZS;BnaA09G0071100ZS;BnaC09G0311500ZS;BnaA09G0264500ZS;BnaA10G0025800ZS;BnaC05G0027100ZS;BnaC08G0524800ZS;BnaA09G0661700ZS;BnaA03G0367100ZS;BnaA03G0367200ZS;BnaC01G0381100ZS;Bna…	K00660+K00660+K00660+K00660+K00660+K03097+K03097+K03097+K03097+K03097+K03097+K03097+K03097+K03097+K03115+K10143+K12118+K12118+K12119+K12119+K12120+K12120+K12125+K12125+K12125+K12125+K12126+K12126+K12126+K12126+K12126+K12126+K12126+K12126+K12126+K12126+K12127+K12127+K12127+K12129+K12129+K12129+K12129+K12129+K12129+K12130+K12130+K12130+K12130+K12130+K12130+K12130+K12130+K12130+K12130+K12130+K12131+…	https:\\www.genome.jp\dbget-bin\www_bget?map04712
Plant hormone signal transduction	ko04075	516 out of 6277 8.22048749402581%	2271 out of 32833 6.91682149057351%	5.12158e-06	0.000722143	BnaA03G0270300ZS;BnaA03G0407400ZS;BnaA05G0010000ZS;BnaA07G0218800ZS;BnaA09G0026700ZS;BnaC03G0324600ZS;BnaC03G0689500ZS;BnaC04G0010300ZS;BnaC07G0207700ZS;BnaC07G0380100ZS;BnaC09G0039500ZS;BnaC09G0418000ZS;Bnascaffold0026G0050200ZS;BnaA01G0096200ZS;BnaA01G0292900ZS;BnaA02G0110000ZS;BnaA02G0233400ZS;BnaA02G0295500ZS;BnaA03G0207300ZS;BnaA03G0449400ZS;BnaA04G0202700ZS;BnaA04G0271600ZS;BnaA05G0127300ZS…	K12126+K12126+K12126+K12126+K12126+K12126+K12126+K12126+K12126+K12126+K13413+K13413+K13413+K13413+K13413+K13413+K13413+K13413+K13413+K13413+K13413+K13413+K13413+K13413+K13413+K13413+K13413+K13413+K13413+K13413+K13413+K13413+K13413+K13413+K13413+K13413+K13413+K13413+K13413+K13413+K13413+K13413+K13413+K13413+K13413+K13413+K13413+K13413+K13413+K13415+K13415+K13415+K13415+K13415+K13415+K13415+K13415+…	https:\\www.genome.jp\dbget-bin\www_bget?map04075
Glycerolipid metabolism	ko00561	156 out of 6277 2.48526366098455%	588 out of 32833 1.79088112569671%	5.83154e-06	0.000822247	BnaA02G0400100ZS;BnaC02G0532200ZS;novel.1193;BnaC08G0284400ZS;BnaA01G0039400ZS;BnaA03G0554200ZS;BnaA06G0170700ZS;BnaA08G0182200ZS;BnaC01G0027700ZS;BnaC01G0045100ZS;BnaC03G0694900ZS;BnaC05G0208700ZS;BnaC07G0530700ZS;BnaA05G0326300ZS;BnaA08G0075600ZS;BnaC05G0343500ZS;BnaC08G0107200ZS;BnaC08G0208800ZS;Bnascaffold0025G0008500ZS;BnaA03G0520300ZS;BnaA04G0215000ZS;BnaA05G0108000ZS;BnaA06G0073900ZS;BnaA0…	K00002+K00002+K00002+K00128+K00128+K00128+K00128+K00128+K00128+K00128+K00128+K00128+K00128+K00630+K00630+K00630+K00630+K00655+K00655+K00655+K00655+K00655+K00655+K00655+K00655+K00655+K00655+K00655+K00655+K00655+K00679+K00679+K00679+K00679+K00679+K00679+K00679+K00679+K00679+K00679+K00679+K00679+K00679+K00679+K00679+K00679+K00679+K00679+K00679+K00679+K00679+K00679+K00679+K00679+K00679+K00679+K00679+…	https:\\www.genome.jp\dbget-bin\www_bget?map00561
Monoterpenoid biosynthesis	ko00902	13 out of 6277 0.207105305082046%	20 out of 32833 0.0609143240032894%	8.97333e-06	0.00126524	BnaC08G0434400ZS;novel.2829;BnaA03G0240000ZS;BnaC03G0283300ZS;BnaC03G0304500ZS;BnaA09G0159800ZS;BnaA09G0159900ZS;BnaA09G0160000ZS;BnaC08G0401600ZS;BnaA04G0011500ZS;BnaA09G0554800ZS;BnaC04G0270300ZS;BnaC05G0004100ZS	K07385+K07385+K12467+K12467+K12467+K15086+K15086+K15086+K15095+K15095+K15095+K15095+K15095	https:\\www.genome.jp\dbget-bin\www_bget?map00902
Fructose and mannose metabolism	ko00051	108 out of 6277 1.72056714991238%	387 out of 32833 1.17869216946365%	1.56006e-05	0.00219968	BnaC09G0341100ZS;BnaA10G0089600ZS;BnaC08G0019700ZS;BnaC08G0019800ZS;BnaA05G0176800ZS;BnaA10G0056100ZS;BnaC06G0022700ZS;novel.9541;BnaC08G0341300ZS;BnaA03G0151300ZS;BnaA04G0021200ZS;BnaA04G0205700ZS;BnaA07G0307500ZS;BnaA09G0500800ZS;BnaA10G0088800ZS;BnaC03G0177100ZS;BnaC03G0420000ZS;BnaC04G0286400ZS;BnaC04G0512300ZS;BnaC06G0356900ZS;BnaA01G0050200ZS;BnaA01G0157600ZS;BnaA02G0026300ZS;BnaA03G0115300…	K00008+K00008+K00008+K00008+K00844+K00844+K00844+K00844+K00847+K00847+K00847+K00847+K00847+K00847+K00847+K00847+K00847+K00847+K00847+K00847+K00850+K00850+K00850+K00850+K00850+K00850+K00850+K00850+K00850+K00850+K00850+K00850+K00850+K00850+K00850+K00850+K00850+K00850+K00850+K00850+K00850+K00863+K00895+K00895+K00895+K00895+K00895+K00895+K00966+K00966+K01103+K01103+K01103+K01103+K01623+K01623+K01623+…	https:\\www.genome.jp\dbget-bin\www_bget?map00051
ABC transporters	ko02010	98 out of 6277 1.56125537677234%	356 out of 32833 1.08427496725855%	6.64783e-05	0.00937344	BnaA01G0227000ZS;BnaA06G0172800ZS;BnaA06G0261200ZS;BnaC03G0575300ZS;BnaA07G0266700ZS;BnaC06G0299800ZS;BnaC08G0476000ZS;BnaC09G0026900ZS;Bnascaffold0024G0000200ZS;BnaA01G0045000ZS;BnaA01G0148700ZS;BnaA01G0154600ZS;BnaA03G0445100ZS;BnaA03G0485100ZS;BnaA04G0296500ZS;BnaA05G0008100ZS;BnaA05G0008800ZS;BnaA06G0368200ZS;BnaA07G0219300ZS;BnaA08G0173300ZS;BnaA09G0427600ZS;BnaA10G0012300ZS;BnaC01G0051300ZS…	K05643+K05643+K05643+K05643+K05656+K05656+K05658+K05658+K05658+K05658+K05658+K05658+K05658+K05658+K05658+K05658+K05658+K05658+K05658+K05658+K05658+K05658+K05658+K05658+K05658+K05658+K05658+K05658+K05658+K05658+K05658+K05658+K05658+K05658+K05658+K05658+K05658+K05658+K05658+K05665+K05665+K05665+K05665+K05665+K05665+K05665+K05665+K05666+K05666+K05666+K05666+K05677+K05677+K05681+K05681+K05681+K05681+…	https:\\www.genome.jp\dbget-bin\www_bget?map02010
Zeatin biosynthesis	ko00908	49 out of 6277 0.780627688386172%	154 out of 32833 0.469040294825328%	0.00011421	0.0161036	BnaC08G0420600ZS;BnaA03G0203000ZS;BnaC03G0239900ZS;Bnascaffold0026G0006100ZS;BnaC03G0098500ZS;BnaA02G0164000ZS;BnaC02G0210000ZS;BnaC04G0380600ZS;BnaC09G0474600ZS;BnaA02G0076800ZS;BnaA07G0075700ZS;BnaA10G0183600ZS;BnaC02G0090600ZS;BnaC04G0257300ZS;BnaC07G0117300ZS;novel.782;BnaC09G0588900ZS;BnaC09G0589000ZS;BnaC09G0589400ZS;BnaC09G0589500ZS;BnaA03G0237400ZS;BnaA07G0192900ZS;BnaA10G0272200ZS;BnaA10…	K00279+K00279+K00279+K00791+K00791+K10717+K10717+K10717+K10760+K10760+K10760+K10760+K10760+K10760+K10760+K10760+K13493+K13493+K13493+K13493+K13493+K13493+K13493+K13493+K13493+K13493+K13493+K13493+K13493+K13496+K13496+K13496+K13496+K13496+K13496+K13496+K13496+K13496+K13496+K13496+K13496+K23452+K23452+K23452+K23452+K23452+K23452+K23452+K23452	https:\\www.genome.jp\dbget-bin\www_bget?map00908
Tropane, piperidine and pyridine alkaloid biosynthesis	ko00960	63 out of 6277 1.00366417078222%	215 out of 32833 0.654828983035361%	0.000199258	0.0280954	BnaA01G0200500ZS;BnaA02G0263300ZS;BnaA02G0263500ZS;BnaA03G0553300ZS;BnaA04G0296800ZS;BnaA07G0313100ZS;BnaA08G0083500ZS;BnaA08G0083600ZS;BnaC01G0252100ZS;BnaC02G0357300ZS;BnaC02G0357600ZS;BnaC03G0801200ZS;BnaC04G0613900ZS;BnaC07G0529600ZS;BnaC08G0458300ZS;BnaA02G0135900ZS;BnaA03G0238000ZS;BnaA03G0473600ZS;BnaA05G0144400ZS;BnaA09G0604200ZS;BnaC02G0171200ZS;BnaC06G0151600ZS;BnaC07G0451900ZS;novel.14…	K00276+K00276+K00276+K00276+K00276+K00276+K00276+K00276+K00276+K00276+K00276+K00276+K00276+K00276+K00815+K00815+K00815+K00815+K00815+K00815+K00815+K00815+K00815+K00815+K00815+K08081+K08081+K08081+K08081+K08081+K08081+K08081+K08081+K08081+K08081+K08081+K08081+K08081+K08081+K08081+K08081+K08081+K08081+K08081+K08081+K08081+K08081+K08081+K08081+K08081+K08081+K08081+K08081+K14454+K14454+K14454+K14454+…	https:\\www.genome.jp\dbget-bin\www_bget?map00960
Glycolysis / Gluconeogenesis	ko00010	178 out of 6277 2.83574956189262%	732 out of 32833 2.22946425852039%	0.000257418	0.036296	BnaC08G0450700ZS;BnaA02G0383900ZS;BnaA09G0597200ZS;BnaC02G0514000ZS;BnaA02G0400100ZS;BnaC02G0532200ZS;novel.1193;BnaC08G0272600ZS;BnaA01G0121600ZS;BnaA07G0122900ZS;BnaA09G0461800ZS;BnaC07G0180700ZS;BnaC08G0284400ZS;BnaA01G0039400ZS;BnaA03G0554200ZS;BnaA06G0170700ZS;BnaA08G0182200ZS;BnaC01G0027700ZS;BnaC01G0045100ZS;BnaC03G0694900ZS;BnaC05G0208700ZS;BnaC07G0530700ZS;BnaC08G0433500ZS;BnaA04G0160500…	K00001+K00001+K00001+K00001+K00002+K00002+K00002+K00121+K00121+K00121+K00121+K00121+K00128+K00128+K00128+K00128+K00128+K00128+K00128+K00128+K00128+K00128+K00131+K00131+K00131+K00131+K00134+K00134+K00134+K00134+K00382+K00382+K00844+K00844+K00844+K00844+K00850+K00850+K00850+K00850+K00850+K00850+K00850+K00850+K00850+K00850+K00850+K00850+K00850+K00850+K00850+K00850+K00850+K00850+K00850+K00850+K00850+…	https:\\www.genome.jp\dbget-bin\www_bget?map00010
Thiamine metabolism	ko00730	29 out of 6277 0.462004142106102%	81 out of 32833 0.246703012213322%	0.000310564	0.0437896	BnaC09G0032200ZS;BnaA08G0078800ZS;BnaA09G0046500ZS;BnaA10G0063100ZS;BnaA10G0180200ZS;BnaC06G0013100ZS;BnaC08G0111500ZS;BnaA08G0321000ZS;BnaA03G0368100ZS;BnaC01G0246000ZS;BnaC07G0401700ZS;BnaC09G0372400ZS;BnaA02G0131600ZS;BnaA03G0124100ZS;BnaA10G0109700ZS;BnaC02G0164500ZS;BnaC03G0143700ZS;BnaA05G0139000ZS;BnaC04G0183400ZS;BnaA01G0374600ZS;BnaC01G0467800ZS;BnaC08G0216700ZS;BnaC08G0506300ZS;BnaC09G0…	K00939+K00939+K00939+K00939+K00939+K00939+K00939+K00949+K01662+K01662+K01662+K03146+K03146+K03146+K03146+K03146+K03146+K03147+K03147+K20896+K20896+K22911+K22911+K22911+K22911+K22911+K22911+K22911+K22911	https:\\www.genome.jp\dbget-bin\www_bget?map00730
Biosynthesis of amino acids	ko01230	293 out of 6277 4.66783495300303%	1288 out of 32833 3.92288246581184%	0.000518507	0.0731095	BnaC02G0325500ZS;BnaA06G0013000ZS;BnaA08G0015300ZS;BnaC06G0076400ZS;BnaC06G0080600ZS;BnaC06G0133500ZS;BnaA01G0039900ZS;BnaA03G0358500ZS;BnaA03G0543100ZS;BnaA08G0136800ZS;BnaC01G0045700ZS;BnaC03G0436800ZS;BnaC03G0747700ZS;BnaC07G0519100ZS;BnaA06G0098000ZS;BnaA07G0230600ZS;BnaA09G0640500ZS;BnaC05G0135800ZS;BnaC06G0249000ZS;BnaA03G0215200ZS;BnaA03G0129800ZS;BnaC03G0150600ZS;BnaC09G0324500ZS;BnaA03G0…	K00052+K00053+K00053+K00053+K00053+K00053+K00058+K00058+K00058+K00058+K00058+K00058+K00058+K00058+K00133+K00134+K00134+K00134+K00134+K00215+K00264+K00264+K00286+K00286+K00286+K00549+K00549+K00600+K00600+K00600+K00600+K00600+K00600+K00600+K00600+K00615+K00615+K00615+K00615+K00615+K00615+K00616+K00616+K00616+K00616+K00616+K00640+K00640+K00641+K00765+K00765+K00765+K00765+K00789+K00789+K00814+K00818+…	https:\\www.genome.jp\dbget-bin\www_bget?map01230
Vitamin B6 metabolism	ko00750	23 out of 6277 0.366417078222081%	61 out of 32833 0.185788688210033%	0.000543913	0.0766917	BnaA03G0021200ZS;BnaC03G0025700ZS;novel.9938;BnaC09G0115400ZS;BnaC09G0126400ZS;BnaA01G0075200ZS;BnaA02G0203200ZS;BnaA09G0120900ZS;BnaC01G0089100ZS;BnaC09G0357600ZS;BnaA08G0306200ZS;BnaA10G0100500ZS;BnaC08G0024900ZS;BnaA01G0344100ZS;BnaA03G0003200ZS;BnaA04G0245700ZS;BnaC01G0425000ZS;BnaC03G0005300ZS;BnaC04G0560700ZS;BnaC09G0440300ZS;BnaA10G0157500ZS;BnaC02G0118000ZS;BnaC06G0395100ZS	K00275+K00275+K00275+K00831+K01733+K01733+K01733+K01733+K01733+K05275+K05275+K05275+K05275+K06215+K06215+K06215+K06215+K06215+K06215+K08681+K08681+K08681+K13248	https:\\www.genome.jp\dbget-bin\www_bget?map00750
Glucosinolate biosynthesis	ko00966	39 out of 6277 0.621315915246137%	123 out of 32833 0.37462309262023%	0.000582068	0.0820716	BnaC08G0199000ZS;BnaC08G0298700ZS;BnaA01G0217100ZS;BnaA06G0032400ZS;BnaA06G0063200ZS;BnaA06G0156700ZS;BnaA08G0027900ZS;BnaC05G0078800ZS;BnaC05G0078900ZS;BnaC07G0541500ZS;BnaC04G0436200ZS;BnaA09G0123400ZS;BnaA06G0110600ZS;BnaC05G0136700ZS;BnaA04G0267400ZS;BnaC04G0584500ZS;BnaA02G0257100ZS;BnaC02G0347600ZS;novel.5717;novel.1407;novel.8786;novel.1014;BnaA03G0359600ZS;BnaA05G0362200ZS;BnaC03G0438900Z…	K00826+K00826+K00826+K00826+K00826+K00826+K00826+K00826+K00826+K11812+K11813+K11819+K12154+K12154+K12156+K12156+K15741+K15741+K15741+K15741+K15741+K15741+K21346+K21346+K21346+K21346+K21359+K21359+K21360+K21360+K22321+K22321+K22321+K22321+K22321+K22321+K22321+K22321+K22321	https:\\www.genome.jp\dbget-bin\www_bget?map00966
Fatty acid elongation	ko00062	46 out of 6277 0.732834156444161%	152 out of 32833 0.462948862424999%	0.000631607	0.0890566	BnaA01G0177200ZS;BnaC01G0227100ZS;BnaA07G0102200ZS;BnaC07G0154300ZS;novel.3403;BnaC08G0352800ZS;BnaC09G0552800ZS;BnaA02G0102800ZS;BnaA10G0242100ZS;BnaC03G0047500ZS;BnaC08G0450600ZS;BnaA01G0004400ZS;BnaA01G0022000ZS;BnaA04G0173100ZS;BnaA05G0012000ZS;BnaA06G0045100ZS;BnaA06G0135600ZS;BnaA06G0136500ZS;BnaA07G0020300ZS;BnaA07G0037000ZS;BnaA07G0037100ZS;BnaA07G0275100ZS;BnaA08G0301900ZS;BnaA09G0437300…	K01074+K01074+K10251+K10251+K10251+K10258+K10703+K10703+K10703+K10703+K15397+K15397+K15397+K15397+K15397+K15397+K15397+K15397+K15397+K15397+K15397+K15397+K15397+K15397+K15397+K15397+K15397+K15397+K15397+K15397+K15397+K15397+K15397+K15397+K15397+K15397+K15397+K15397+K15397+K15397+K15397+K15397+K15397+K15397+K15397+K15397	https:\\www.genome.jp\dbget-bin\www_bget?map00062
Isoflavonoid biosynthesis	ko00943	23 out of 6277 0.366417078222081%	63 out of 32833 0.191880120610362%	0.000917947	0.129431	BnaC08G0251700ZS;BnaA01G0222400ZS;BnaA06G0133400ZS;BnaA07G0303200ZS;BnaA08G0030000ZS;BnaA08G0044700ZS;BnaA08G0252800ZS;BnaC05G0160900ZS;BnaC08G0057400ZS;BnaC08G0057500ZS;BnaC09G0549600ZS;BnaA01G0015400ZS;BnaA01G0015500ZS;BnaA07G0141100ZS;BnaA07G0141200ZS;BnaA07G0141300ZS;BnaC01G0018200ZS;BnaC07G0205200ZS;BnaA08G0317300ZS;BnaC08G0007500ZS;BnaC04G0604400ZS;BnaC08G0455500ZS;BnaA09G0457500ZS	K13258+K13258+K13258+K13258+K13258+K13258+K13258+K13258+K13258+K13258+K13260+K13260+K13260+K13260+K13260+K13260+K13260+K13260+K13264+K13264+K13265+K25075+K25075	https:\\www.genome.jp\dbget-bin\www_bget?map00943
Isoquinoline alkaloid biosynthesis	ko00950	63 out of 6277 1.00366417078222%	227 out of 32833 0.691377577437334%	0.000963399	0.135839	BnaA01G0200500ZS;BnaA02G0263300ZS;BnaA02G0263500ZS;BnaA03G0553300ZS;BnaA04G0296800ZS;BnaA07G0313100ZS;BnaA08G0083500ZS;BnaA08G0083600ZS;BnaC01G0252100ZS;BnaC02G0357300ZS;BnaC02G0357600ZS;BnaC03G0801200ZS;BnaC04G0613900ZS;BnaC07G0529600ZS;BnaC08G0458300ZS;BnaA02G0135900ZS;BnaA03G0238000ZS;BnaA03G0473600ZS;BnaA05G0144400ZS;BnaA09G0604200ZS;BnaC02G0171200ZS;BnaC06G0151600ZS;BnaC07G0451900ZS;novel.14…	K00276+K00276+K00276+K00276+K00276+K00276+K00276+K00276+K00276+K00276+K00276+K00276+K00276+K00276+K00815+K00815+K00815+K00815+K00815+K00815+K00815+K00815+K00815+K00815+K00815+K01592+K01592+K01593+K01742+K01742+K01742+K01742+K01742+K01742+K01742+K01742+K01742+K01742+K01742+K01742+K01742+K01742+K01742+K01742+K01742+K01742+K13384+K13384+K13384+K14454+K14454+K14454+K14454+K14454+K14454+K14454+K14455+…	https:\\www.genome.jp\dbget-bin\www_bget?map00950
Betalain biosynthesis	ko00965	33 out of 6277 0.525728851362116%	104 out of 32833 0.316754484817105%	0.00145599	0.205295	BnaA07G0003700ZS;BnaC08G0160800ZS;BnaC08G0489400ZS;BnaC08G0491200ZS;BnaC09G0028700ZS;BnaC09G0088200ZS;BnaC09G0120400ZS;BnaC09G0214800ZS;BnaC09G0511400ZS;BnaA01G0142400ZS;BnaA04G0110100ZS;BnaA05G0149300ZS;BnaA06G0303300ZS;BnaA06G0374500ZS;BnaA07G0250600ZS;BnaA07G0347300ZS;BnaA08G0092200ZS;BnaA08G0174700ZS;BnaA09G0043100ZS;BnaA09G0116600ZS;BnaA09G0187100ZS;BnaA09G0611800ZS;BnaA09G0633400ZS;BnaA10G0…	K01593+K15777+K15777+K15777+K15777+K15777+K15777+K15777+K15777+K15777+K15777+K15777+K15777+K15777+K15777+K15777+K15777+K15777+K15777+K15777+K15777+K15777+K15777+K15777+K15777+K15777+K15777+K15777+K15777+K15777+K15777+K15777+K15777	https:\\www.genome.jp\dbget-bin\www_bget?map00965
Tryptophan metabolism	ko00380	117 out of 6277 1.86394774573841%	476 out of 32833 1.44976091127829%	0.00179703	0.253381	BnaC08G0284400ZS;BnaA01G0039400ZS;BnaA03G0554200ZS;BnaA06G0170700ZS;BnaA08G0182200ZS;BnaC01G0027700ZS;BnaC01G0045100ZS;BnaC03G0694900ZS;BnaC05G0208700ZS;BnaC07G0530700ZS;BnaC03G0419600ZS;BnaC06G0024800ZS;BnaC09G0250500ZS;BnaA07G0389000ZS;BnaC06G0457800ZS;BnaA05G0175500ZS;BnaC05G0295800ZS;novel.4052;novel.5700;novel.8233;novel.9065;novel.994;novel.999;novel.2026;novel.3349;BnaC08G0528200ZS;BnaA06G…	K00128+K00128+K00128+K00128+K00128+K00128+K00128+K00128+K00128+K00128+K00382+K00382+K00626+K00837+K00837+K01237+K01237+K01237+K01237+K01237+K01237+K01237+K01237+K01237+K01237+K01426+K01426+K01426+K01426+K01501+K01501+K01501+K01501+K01593+K03781+K03781+K03781+K03781+K03781+K03781+K03781+K03781+K03781+K03781+K03781+K03781+K11812+K11813+K11816+K11816+K11816+K11816+K11816+K11816+K11816+K11817+K11817+…	https:\\www.genome.jp\dbget-bin\www_bget?map00380
Glycosaminoglycan degradation	ko00531	49 out of 6277 0.780627688386172%	172 out of 32833 0.523863186428289%	0.00184157	0.259662	BnaA02G0050000ZS;BnaC02G0057600ZS;BnaA06G0367100ZS;BnaA08G0095500ZS;BnaC02G0499200ZS;BnaC08G0137100ZS;BnaC08G0308700ZS;BnaC08G0376700ZS;BnaC09G0255600ZS;BnaC09G0256500ZS;BnaC09G0256600ZS;BnaC09G0444300ZS;BnaC09G0444500ZS;BnaA01G0233800ZS;BnaA01G0357700ZS;BnaA02G0095900ZS;BnaA02G0121300ZS;BnaA02G0286300ZS;BnaA02G0320500ZS;BnaA02G0418100ZS;BnaA06G0049200ZS;BnaA06G0186000ZS;BnaA06G0289000ZS;BnaA06G0…	K01205+K01205+K10532+K10532+K10532+K10532+K12309+K12309+K12309+K12309+K12309+K12309+K12309+K12309+K12309+K12309+K12309+K12309+K12309+K12309+K12309+K12309+K12309+K12309+K12309+K12309+K12309+K12309+K12309+K12309+K12309+K12309+K12309+K12309+K12309+K12309+K12309+K12309+K12309+K12309+K12309+K12309+K12309+K12309+K12309+K12309+K12309+K12309+K12373	https:\\www.genome.jp\dbget-bin\www_bget?map00531
Anthocyanin biosynthesis	ko00942	12 out of 6277 0.191174127768042%	28 out of 32833 0.0852800536046051%	0.0033549	0.473041	BnaA08G0082300ZS;BnaC08G0116200ZS;BnaC09G0362400ZS;BnaA02G0135700ZS;BnaA03G0127600ZS;BnaA06G0035700ZS;BnaA06G0190700ZS;BnaA08G0028900ZS;BnaA10G0103400ZS;BnaC02G0171000ZS;BnaC03G0148100ZS;BnaC03G0780100ZS	K12338+K12338+K17193+K17193+K17193+K17193+K17193+K17193+K17193+K17193+K17193+K17193	https:\\www.genome.jp\dbget-bin\www_bget?map00942
Glycosphingolipid biosynthesis - ganglio series	ko00604	43 out of 6277 0.685040624502151%	153 out of 32833 0.465994578625164%	0.00440154	0.620617	BnaC08G0308700ZS;BnaC08G0376700ZS;BnaC09G0255600ZS;BnaC09G0256500ZS;BnaC09G0256600ZS;BnaC09G0444300ZS;BnaC09G0444500ZS;BnaA01G0233800ZS;BnaA01G0357700ZS;BnaA02G0095900ZS;BnaA02G0121300ZS;BnaA02G0286300ZS;BnaA02G0320500ZS;BnaA02G0418100ZS;BnaA06G0049200ZS;BnaA06G0186000ZS;BnaA06G0289000ZS;BnaA06G0289100ZS;BnaA06G0404200ZS;BnaA06G0404500ZS;BnaA07G0276600ZS;BnaA09G0219500ZS;BnaA09G0220600ZS;BnaA09G0…	K12309+K12309+K12309+K12309+K12309+K12309+K12309+K12309+K12309+K12309+K12309+K12309+K12309+K12309+K12309+K12309+K12309+K12309+K12309+K12309+K12309+K12309+K12309+K12309+K12309+K12309+K12309+K12309+K12309+K12309+K12309+K12309+K12309+K12309+K12309+K12309+K12309+K12309+K12309+K12309+K12309+K12309+K12373	https:\\www.genome.jp\dbget-bin\www_bget?map00604
Pentose and glucuronate interconversions	ko00040	219 out of 6277 3.48892783176677%	979 out of 32833 2.98175615996101%	0.0054833	0.773146	BnaA02G0400100ZS;BnaC02G0532200ZS;novel.1193;BnaC09G0341100ZS;BnaA10G0089600ZS;BnaC08G0019700ZS;BnaC08G0019800ZS;BnaC09G0509300ZS;BnaA02G0059400ZS;BnaA07G0170000ZS;BnaA10G0208700ZS;BnaC06G0160700ZS;novel.7968;novel.2400;BnaA03G0517300ZS;BnaA09G0564300ZS;BnaC02G0081600ZS;BnaC04G0517800ZS;BnaC08G0416300ZS;BnaC08G0512700ZS;BnaC09G0069900ZS;BnaC09G0168000ZS;BnaC09G0168300ZS;BnaC09G0254700ZS;BnaC09G02…	K00002+K00002+K00002+K00008+K00008+K00008+K00008+K00012+K00012+K00012+K00012+K00012+K00078+K00078+K00875+K00963+K00963+K00963+K01051+K01051+K01051+K01051+K01051+K01051+K01051+K01051+K01051+K01051+K01051+K01051+K01051+K01051+K01051+K01051+K01051+K01051+K01051+K01051+K01051+K01051+K01051+K01051+K01051+K01051+K01051+K01051+K01051+K01051+K01051+K01051+K01051+K01051+K01051+K01051+K01051+K01051+K01051+…	https:\\www.genome.jp\dbget-bin\www_bget?map00040
Other glycan degradation	ko00511	74 out of 6277 1.17890712123626%	295 out of 32833 0.898486279048518%	0.00671315	0.946554	BnaC08G0233600ZS;BnaA06G0103900ZS;BnaA08G0268100ZS;BnaA09G0101600ZS;BnaC05G0128700ZS;BnaC09G0517700ZS;BnaA02G0169200ZS;BnaA05G0476800ZS;BnaA06G0008400ZS;BnaA06G0264600ZS;BnaA07G0093200ZS;BnaA07G0093700ZS;BnaA08G0211800ZS;BnaA09G0421600ZS;BnaA09G0421900ZS;BnaC02G0217500ZS;BnaC02G0466700ZS;BnaC03G0570600ZS;BnaC03G0653600ZS;BnaC03G0653700ZS;BnaC04G0218500ZS;BnaC05G0538100ZS;BnaC07G0142600ZS;BnaC07G0…	K01191+K01191+K01191+K01191+K01191+K01206+K01206+K01206+K01206+K01206+K01206+K01206+K01206+K01206+K01206+K01206+K01206+K01206+K01206+K01206+K01206+K01206+K01206+K01206+K01206+K01206+K01206+K12309+K12309+K12309+K12309+K12309+K12309+K12309+K12309+K12309+K12309+K12309+K12309+K12309+K12309+K12309+K12309+K12309+K12309+K12309+K12309+K12309+K12309+K12309+K12309+K12309+K12309+K12309+K12309+K12309+K12309+…	https:\\www.genome.jp\dbget-bin\www_bget?map00511
Flavone and flavonol biosynthesis	ko00944	6 out of 6277 0.095587063884021%	11 out of 32833 0.0335028782018092%	0.00928366	1	BnaC09G0570900ZS;BnaA10G0256900ZS;BnaA02G0067600ZS;BnaC02G0077700ZS;BnaA08G0317300ZS;BnaC08G0007500ZS	K05280+K05280+K10757+K10757+K13264+K13264	https:\\www.genome.jp\dbget-bin\www_bget?map00944
Phenylalanine, tyrosine and tryptophan biosynthesis	ko00400	63 out of 6277 1.00366417078222%	250 out of 32833 0.761429050041117%	0.0104834	1	BnaC08G0458300ZS;BnaA02G0135900ZS;BnaA03G0238000ZS;BnaA03G0473600ZS;BnaA05G0144400ZS;BnaA09G0604200ZS;BnaC02G0171200ZS;BnaC06G0151600ZS;BnaC07G0451900ZS;novel.1470;novel.8853;BnaA06G0387100ZS;BnaC01G0006100ZS;BnaC04G0432500ZS;BnaC04G0540100ZS;BnaC07G0300500ZS;BnaA06G0365700ZS;BnaC02G0065600ZS;BnaC07G0327000ZS;BnaC08G0272200ZS;BnaA01G0044300ZS;BnaA09G0461900ZS;BnaC01G0050600ZS;BnaC05G0194900ZS;Bna…	K00815+K00815+K00815+K00815+K00815+K00815+K00815+K00815+K00815+K00815+K00815+K00891+K00891+K00891+K00891+K00891+K01609+K01609+K01609+K01626+K01626+K01626+K01626+K01626+K01657+K01657+K01696+K01850+K01850+K01850+K01850+K05359+K05359+K05359+K05359+K05359+K05359+K05359+K05359+K05359+K05359+K05359+K06001+K06001+K06001+K06001+K13832+K13832+K13832+K13832+K13832+K13832+K14454+K14454+K14454+K14454+K14454+…	https:\\www.genome.jp\dbget-bin\www_bget?map00400
Nicotinate and nicotinamide metabolism	ko00760	36 out of 6277 0.573522383304126%	130 out of 32833 0.395943106021381%	0.0109523	1	BnaA05G0347100ZS;BnaA06G0153700ZS;BnaC05G0187100ZS;BnaC02G0489800ZS;BnaC09G0476100ZS;BnaA10G0184800ZS;BnaC04G0102100ZS;BnaC08G0018600ZS;BnaC08G0352200ZS;BnaC08G0406900ZS;BnaA01G0076300ZS;BnaA01G0076400ZS;BnaA03G0511800ZS;BnaA05G0015100ZS;BnaA06G0069000ZS;BnaA07G0217300ZS;BnaA08G0158400ZS;BnaA08G0287300ZS;BnaA09G0510700ZS;BnaC01G0091800ZS;BnaC01G0091900ZS;BnaC03G0778100ZS;BnaC04G0015500ZS;novel.41…	K00858+K00858+K00858+K01081+K01240+K01240+K01240+K01240+K01513+K01513+K01513+K01513+K01513+K01513+K01513+K01513+K01513+K01513+K01513+K01513+K01513+K01513+K01513+K01513+K01513+K03517+K03517+K03787+K03787+K03787+K03787+K03787+K11414+K11414+K18551+K18551	https:\\www.genome.jp\dbget-bin\www_bget?map00760
Tyrosine metabolism	ko00350	57 out of 6277 0.9080771068982%	229 out of 32833 0.697469009837663%	0.0182391	1	BnaC08G0450700ZS;BnaA02G0383900ZS;BnaA09G0597200ZS;BnaC02G0514000ZS;BnaC08G0272600ZS;BnaA01G0121600ZS;BnaA07G0122900ZS;BnaA09G0461800ZS;BnaC07G0180700ZS;BnaA01G0200500ZS;BnaA02G0263300ZS;BnaA02G0263500ZS;BnaA03G0553300ZS;BnaA04G0296800ZS;BnaA07G0313100ZS;BnaA08G0083500ZS;BnaA08G0083600ZS;BnaC01G0252100ZS;BnaC02G0357300ZS;BnaC02G0357600ZS;BnaC03G0801200ZS;BnaC04G0613900ZS;BnaC07G0529600ZS;BnaA09G0…	K00001+K00001+K00001+K00001+K00121+K00121+K00121+K00121+K00121+K00276+K00276+K00276+K00276+K00276+K00276+K00276+K00276+K00276+K00276+K00276+K00276+K00276+K00276+K00457+K00457+K00457+K00815+K00815+K00815+K00815+K00815+K00815+K00815+K00815+K00815+K00815+K00815+K01557+K01592+K01592+K01593+K07253+K07253+K07253+K07253+K14454+K14454+K14454+K14454+K14454+K14454+K14454+K14455+K15849+K15849+K18857+K18857	https:\\www.genome.jp\dbget-bin\www_bget?map00350
Alanine, aspartate and glutamate metabolism	ko00250	70 out of 6277 1.11518241198025%	291 out of 32833 0.88630341424786%	0.0210706	1	BnaC09G0483800ZS;BnaC09G0483900ZS;BnaA10G0190000ZS;BnaC07G0339000ZS;BnaA03G0129800ZS;BnaC03G0150600ZS;BnaA07G0036400ZS;BnaC01G0040600ZS;novel.6774;BnaA02G0299800ZS;BnaC01G0007500ZS;BnaC02G0408900ZS;BnaC09G0104800ZS;BnaA03G0390800ZS;BnaA09G0104000ZS;BnaC03G0483800ZS;BnaC09G0256000ZS;BnaC09G0491600ZS;BnaA02G0320000ZS;BnaA03G0073800ZS;BnaA09G0220100ZS;BnaA10G0195700ZS;BnaC02G0431900ZS;BnaC03G0084100…	K00261+K00261+K00261+K00261+K00264+K00264+K00764+K00764+K00814+K00827+K00827+K00827+K00830+K00830+K00830+K00830+K01580+K01580+K01580+K01580+K01580+K01580+K01580+K01580+K01580+K01915+K01915+K01915+K01915+K01915+K01915+K01915+K01915+K01915+K01915+K01915+K01915+K01915+K01915+K01915+K01915+K01915+K01939+K01939+K01953+K01953+K01953+K01953+K01953+K01953+K13051+K13051+K13566+K13566+K14272+K14272+K14272+…	https:\\www.genome.jp\dbget-bin\www_bget?map00250
Benzoxazinoid biosynthesis	ko00402	16 out of 6277 0.254898837024056%	51 out of 32833 0.155331526208388%	0.0249917	1	BnaC06G0195900ZS;novel.2536;BnaA08G0315600ZS;BnaA09G0675800ZS;BnaC03G0090500ZS;BnaC04G0504200ZS;BnaC04G0504400ZS;BnaC07G0220300ZS;BnaC08G0010000ZS;novel.4267;novel.4315;novel.4317;novel.5847;novel.7345;novel.7354;novel.1130	K13227+K13227+K13229+K13229+K13229+K13229+K13229+K13229+K13229+K13229+K13229+K13229+K13229+K13229+K13229+K13229	https:\\www.genome.jp\dbget-bin\www_bget?map00402
Biosynthesis of cofactors	ko01240	275 out of 6277 4.38107376135096%	1308 out of 32833 3.98379678981513%	0.0409105	1	BnaA02G0400100ZS;BnaC02G0532200ZS;novel.1193;BnaC09G0509300ZS;BnaA02G0059400ZS;BnaA07G0170000ZS;BnaA10G0208700ZS;BnaC06G0160700ZS;BnaA10G0189700ZS;BnaC04G0364400ZS;BnaC05G0554900ZS;BnaA02G0040600ZS;BnaA05G0011700ZS;BnaA05G0011800ZS;BnaA05G0011900ZS;BnaC02G0046800ZS;BnaC04G0009000ZS;BnaC04G0012200ZS;BnaC04G0012300ZS;BnaC04G0012400ZS;novel.5240;BnaC08G0284400ZS;BnaA01G0039400ZS;BnaA03G0554200ZS;Bna…	K00002+K00002+K00002+K00012+K00012+K00012+K00012+K00012+K00059+K00059+K00059+K00103+K00103+K00103+K00103+K00103+K00103+K00103+K00103+K00103+K00103+K00128+K00128+K00128+K00128+K00128+K00128+K00128+K00128+K00128+K00128+K00225+K00228+K00228+K00228+K00228+K00231+K00231+K00231+K00231+K00275+K00275+K00275+K00288+K00288+K00382+K00382+K00457+K00457+K00457+K00600+K00600+K00600+K00600+K00600+K00600+K00600+…	https:\\www.genome.jp\dbget-bin\www_bget?map01240
alpha-Linolenic acid metabolism	ko00592	59 out of 6277 0.939939461526207%	250 out of 32833 0.761429050041117%	0.0446089	1	BnaA08G0056800ZS;BnaC08G0079500ZS;BnaC08G0320100ZS;BnaC03G0198000ZS;BnaC08G0240500ZS;BnaC08G0473100ZS;BnaA02G0200800ZS;BnaC02G0214600ZS;BnaC06G0315300ZS;BnaC06G0315600ZS;novel.8166;novel.8240;novel.3080;novel.3125;novel.3126;BnaA01G0019000ZS;BnaC01G0021900ZS;BnaA02G0222800ZS;BnaA09G0615500ZS;BnaC07G0201300ZS;BnaC09G0267600ZS;BnaA09G0228100ZS;Bnascaffold0510G0000600ZS;BnaA06G0144200ZS;BnaA07G01333…	K00224+K00224+K00232+K00232+K00454+K00454+K00454+K00454+K00454+K00454+K00454+K00454+K00454+K00454+K00454+K01723+K01723+K05894+K05894+K08241+K10525+K10525+K10526+K10526+K10526+K10526+K10526+K10527+K10527+K10528+K10528+K10529+K10529+K10529+K10529+K10529+K10529+K10529+K10529+K14674+K14674+K16818+K16818+K16818+K16818+K16818+K16818+K16818+K16818+K16818+K16818+K16818+K16818+K16818+K18857+K18857+K18858+…	https:\\www.genome.jp\dbget-bin\www_bget?map00592
Phenylalanine metabolism	ko00360	55 out of 6277 0.876214752270193%	233 out of 32833 0.709651874638321%	0.0507217	1	BnaA01G0200500ZS;BnaA02G0263300ZS;BnaA02G0263500ZS;BnaA03G0553300ZS;BnaA04G0296800ZS;BnaA07G0313100ZS;BnaA08G0083500ZS;BnaA08G0083600ZS;BnaC01G0252100ZS;BnaC02G0357300ZS;BnaC02G0357600ZS;BnaC03G0801200ZS;BnaC04G0613900ZS;BnaC07G0529600ZS;BnaA09G0676100ZS;BnaA10G0046800ZS;BnaC05G0047700ZS;BnaC08G0458300ZS;BnaA02G0135900ZS;BnaA03G0238000ZS;BnaA03G0473600ZS;BnaA05G0144400ZS;BnaA09G0604200ZS;BnaC02G0…	K00276+K00276+K00276+K00276+K00276+K00276+K00276+K00276+K00276+K00276+K00276+K00276+K00276+K00276+K00457+K00457+K00457+K00815+K00815+K00815+K00815+K00815+K00815+K00815+K00815+K00815+K00815+K00815+K01426+K01426+K01426+K01426+K01593+K07253+K07253+K07253+K07253+K10775+K10775+K10775+K10775+K10775+K10775+K10775+K10775+K14454+K14454+K14454+K14454+K14454+K14454+K14454+K14455+K15849+K15849	https:\\www.genome.jp\dbget-bin\www_bget?map00360
Arginine biosynthesis	ko00220	42 out of 6277 0.669109447188147%	176 out of 32833 0.536046051228946%	0.0684414	1	BnaC09G0483800ZS;BnaC09G0483900ZS;BnaA10G0190000ZS;BnaC07G0339000ZS;novel.6774;BnaA07G0387600ZS;BnaC09G0498800ZS;BnaA01G0331500ZS;BnaA03G0351300ZS;BnaA04G0089100ZS;BnaA04G0089200ZS;BnaA04G0096800ZS;BnaA07G0182800ZS;BnaA08G0077600ZS;BnaA10G0200900ZS;BnaC01G0409900ZS;BnaC02G0075000ZS;BnaC03G0426200ZS;BnaC04G0369400ZS;BnaC04G0378100ZS;BnaC04G0386000ZS;BnaC06G0181200ZS;BnaC08G0109700ZS;BnaC08G0370500…	K00261+K00261+K00261+K00261+K00814+K00818+K01915+K01915+K01915+K01915+K01915+K01915+K01915+K01915+K01915+K01915+K01915+K01915+K01915+K01915+K01915+K01915+K01915+K13427+K13427+K13427+K13427+K14272+K14272+K14272+K14272+K14272+K14272+K14454+K14454+K14454+K14454+K14454+K14454+K14454+K14455+K14682	https:\\www.genome.jp\dbget-bin\www_bget?map00220
Peroxisome	ko04146	95 out of 6277 1.51346184483033%	435 out of 32833 1.32488654707154%	0.0836357	1	BnaA09G0023600ZS;novel.9441;BnaC08G0320100ZS;BnaC03G0198000ZS;BnaC09G0104800ZS;BnaA03G0390800ZS;BnaA09G0104000ZS;BnaC03G0483800ZS;BnaA02G0371900ZS;BnaC02G0498100ZS;BnaA05G0351700ZS;novel.1440;BnaC04G0210400ZS;BnaA03G0376800ZS;BnaA04G0054300ZS;BnaA04G0297500ZS;BnaA05G0006100ZS;BnaA05G0470300ZS;BnaA06G0348800ZS;BnaC03G0461600ZS;BnaC04G0007500ZS;BnaC04G0356100ZS;BnaC04G0614600ZS;BnaC08G0260800ZS;Bna…	K00106+K00106+K00232+K00232+K00830+K00830+K00830+K00830+K00869+K00869+K01578+K01578+K01640+K01897+K01897+K01897+K01897+K01897+K01897+K01897+K01897+K01897+K01897+K03781+K03781+K03781+K03781+K03781+K03781+K03781+K03781+K03781+K03781+K03781+K03781+K04564+K04564+K04564+K04564+K04564+K04564+K04565+K04565+K04565+K05677+K05677+K08726+K08726+K08726+K08726+K11147+K11147+K11517+K11517+K11517+K11517+K11517+…	https:\\www.genome.jp\dbget-bin\www_bget?map04146
Galactose metabolism	ko00052	119 out of 6277 1.89581010036642%	562 out of 32833 1.71169250449243%	0.116597	1	BnaA05G0176800ZS;BnaA10G0056100ZS;BnaC06G0022700ZS;novel.9541;BnaA01G0050200ZS;BnaA01G0157600ZS;BnaA02G0026300ZS;BnaA03G0115300ZS;BnaA06G0138600ZS;BnaA06G0138900ZS;BnaA08G0214700ZS;BnaA09G0403800ZS;BnaA09G0404100ZS;BnaA09G0492500ZS;BnaC01G0058900ZS;BnaC01G0096300ZS;BnaC01G0200700ZS;BnaC03G0203900ZS;BnaC03G0649900ZS;BnaC04G0132600ZS;BnaC05G0167600ZS;BnaC05G0268500ZS;BnaC05G0268800ZS;BnaC07G0383400…	K00844+K00844+K00844+K00844+K00850+K00850+K00850+K00850+K00850+K00850+K00850+K00850+K00850+K00850+K00850+K00850+K00850+K00850+K00850+K00850+K00850+K00850+K00850+K00850+K00850+K00963+K00963+K00963+K01193+K01193+K01193+K01193+K01193+K01193+K01193+K01193+K01193+K01193+K01193+K01193+K01193+K01193+K01193+K01193+K01193+K01193+K01193+K01784+K01784+K01784+K01784+K01784+K01784+K01785+K01785+K01785+K01785+…	https:\\www.genome.jp\dbget-bin\www_bget?map00052
Steroid biosynthesis	ko00100	38 out of 6277 0.605384737932133%	166 out of 32833 0.505588889227302%	0.128042	1	BnaC09G0058800ZS;BnaA01G0012500ZS;BnaA02G0387500ZS;BnaA02G0387600ZS;BnaA04G0056500ZS;BnaA06G0326600ZS;BnaA06G0326700ZS;BnaA09G0068700ZS;BnaC01G0014800ZS;BnaC02G0518400ZS;BnaC02G0518900ZS;BnaC07G0367400ZS;BnaC04G0579600ZS;BnaC09G0520100ZS;BnaA07G0043100ZS;BnaA10G0216500ZS;BnaA07G0135900ZS;BnaC07G0197900ZS;BnaA07G0077200ZS;BnaA02G0230400ZS;BnaC02G0310700ZS;BnaC08G0429300ZS;BnaA09G0577700ZS;BnaC03G0…	K00511+K00511+K00511+K00511+K00511+K00511+K00511+K00511+K00511+K00511+K00511+K00511+K00559+K01052+K01052+K01052+K01824+K01824+K01853+K08242+K08242+K08246+K08246+K08246+K09828+K09828+K09828+K09828+K09832+K14423+K14423+K14423+K14423+K14424+K14424+K14674+K14674+K23558	https:\\www.genome.jp\dbget-bin\www_bget?map00100
Brassinosteroid biosynthesis	ko00905	12 out of 6277 0.191174127768042%	46 out of 32833 0.140102945207566%	0.154719	1	BnaA07G0337900ZS;BnaC06G0397500ZS;BnaA10G0273600ZS;BnaC09G0503900ZS;BnaA02G0062300ZS;BnaA03G0066200ZS;BnaA10G0204900ZS;BnaC02G0072100ZS;BnaA03G0555000ZS;BnaA06G0369900ZS;BnaC02G0480100ZS;BnaC07G0322400ZS	K09587+K09587+K09588+K09591+K09591+K09591+K09591+K09591+K12637+K12640+K12640+K12640	https:\\www.genome.jp\dbget-bin\www_bget?map00905
Pantothenate and CoA biosynthesis	ko00770	48 out of 6277 0.764696511072168%	221 out of 32833 0.673103280236348%	0.182859	1	BnaA06G0013000ZS;BnaA08G0015300ZS;BnaC06G0076400ZS;BnaC06G0080600ZS;BnaC06G0133500ZS;BnaC08G0284400ZS;BnaA01G0039400ZS;BnaA03G0554200ZS;BnaA06G0170700ZS;BnaA08G0182200ZS;BnaC01G0027700ZS;BnaC01G0045100ZS;BnaC03G0694900ZS;BnaC05G0208700ZS;BnaC07G0530700ZS;BnaC08G0199000ZS;BnaC08G0298700ZS;BnaA01G0217100ZS;BnaA06G0032400ZS;BnaA06G0063200ZS;BnaA06G0156700ZS;BnaA08G0027900ZS;BnaC05G0078800ZS;BnaC05G0…	K00053+K00053+K00053+K00053+K00053+K00128+K00128+K00128+K00128+K00128+K00128+K00128+K00128+K00128+K00128+K00826+K00826+K00826+K00826+K00826+K00826+K00826+K00826+K00826+K00859+K01431+K01513+K01513+K01513+K01513+K01513+K01513+K01513+K01513+K01513+K01513+K01513+K01513+K01513+K01513+K01513+K01513+K01513+K01598+K01653+K01653+K02201+K17839	https:\\www.genome.jp\dbget-bin\www_bget?map00770
Aminoacyl-tRNA biosynthesis	ko00970	101 out of 6277 1.60904890871435%	489 out of 32833 1.48935522188043%	0.207091	1	BnaA07G0288000ZS;BnaC06G0330000ZS;BnaA03G0289100ZS;BnaC01G0501700ZS;BnaC03G0347300ZS;BnaC03G0650700ZS;BnaA03G0134000ZS;BnaA04G0171700ZS;BnaC01G0513900ZS;BnaC03G0155700ZS;BnaC04G0469200ZS;novel.2395;BnaA03G0386100ZS;BnaC03G0478600ZS;BnaA03G0262100ZS;BnaC03G0312500ZS;BnaC08G0455600ZS;BnaA01G0358900ZS;BnaA02G0003800ZS;BnaA02G0364900ZS;BnaA03G0334600ZS;BnaA03G0450400ZS;BnaA03G0573400ZS;BnaA05G0414700…	K00604+K00604+K01866+K01866+K01866+K01866+K01867+K01867+K01867+K01867+K01867+K01867+K01868+K01868+K01869+K01869+K01870+K01870+K01870+K01870+K01870+K01870+K01870+K01870+K01870+K01870+K01870+K01870+K01870+K01870+K01870+K01870+K01870+K01870+K01870+K01870+K01870+K01870+K01872+K01872+K01872+K01872+K01872+K01872+K01872+K01872+K01872+K01872+K01872+K01872+K01872+K01873+K01873+K01873+K01874+K01874+K01875+…	https:\\www.genome.jp\dbget-bin\www_bget?map00970
Indole alkaloid biosynthesis	ko00901	20 out of 6277 0.31862354628007%	88 out of 32833 0.268023025614473%	0.229769	1	BnaA07G0003700ZS;BnaC08G0368700ZS;BnaC09G0451700ZS;BnaA01G0207300ZS;BnaA01G0207400ZS;BnaA02G0209200ZS;BnaA04G0031900ZS;BnaA04G0032300ZS;BnaA05G0023600ZS;BnaA07G0343200ZS;BnaA10G0167500ZS;BnaC01G0260300ZS;BnaC01G0260400ZS;BnaC02G0279900ZS;BnaC03G0238400ZS;BnaC04G0025400ZS;BnaC04G0303100ZS;BnaC04G0303200ZS;BnaC04G0303700ZS;BnaC06G0403500ZS	K01593+K01757+K01757+K01757+K01757+K01757+K01757+K01757+K01757+K01757+K01757+K01757+K01757+K01757+K01757+K01757+K01757+K01757+K01757+K01757	https:\\www.genome.jp\dbget-bin\www_bget?map00901
Polyketide sugar unit biosynthesis	ko00523	2 out of 6277 0.031862354628007%	5 out of 32833 0.0152285810008223%	0.244755	1	BnaA06G0081600ZS;BnaC05G0100900ZS	K12451+K12451	https:\\www.genome.jp\dbget-bin\www_bget?map00523
Limonene and pinene degradation	ko00903	10 out of 6277 0.159311773140035%	41 out of 32833 0.124874364206743%	0.247232	1	BnaC08G0284400ZS;BnaA01G0039400ZS;BnaA03G0554200ZS;BnaA06G0170700ZS;BnaA08G0182200ZS;BnaC01G0027700ZS;BnaC01G0045100ZS;BnaC03G0694900ZS;BnaC05G0208700ZS;BnaC07G0530700ZS	K00128+K00128+K00128+K00128+K00128+K00128+K00128+K00128+K00128+K00128	https:\\www.genome.jp\dbget-bin\www_bget?map00903
Linoleic acid metabolism	ko00591	16 out of 6277 0.254898837024056%	70 out of 32833 0.213200134011513%	0.25387	1	BnaC08G0240500ZS;BnaC08G0473100ZS;BnaA02G0200800ZS;BnaC02G0214600ZS;BnaC06G0315300ZS;BnaC06G0315600ZS;novel.8166;novel.8240;novel.3080;novel.3125;novel.3126;BnaA02G0014900ZS;BnaC02G0014700ZS;BnaC09G0044400ZS;BnaA01G0301300ZS;BnaA09G0057100ZS	K00454+K00454+K00454+K00454+K00454+K00454+K00454+K00454+K00454+K00454+K00454+K14674+K14674+K15718+K15718+K15718	https:\\www.genome.jp\dbget-bin\www_bget?map00591
beta-Alanine metabolism	ko00410	64 out of 6277 1.01959534809622%	311 out of 32833 0.94721773825115%	0.27581	1	BnaC08G0284400ZS;BnaA01G0039400ZS;BnaA03G0554200ZS;BnaA06G0170700ZS;BnaA08G0182200ZS;BnaC01G0027700ZS;BnaC01G0045100ZS;BnaC03G0694900ZS;BnaC05G0208700ZS;BnaC07G0530700ZS;BnaC08G0320100ZS;BnaC03G0198000ZS;BnaA01G0200500ZS;BnaA02G0263300ZS;BnaA02G0263500ZS;BnaA03G0553300ZS;BnaA04G0296800ZS;BnaA07G0313100ZS;BnaA08G0083500ZS;BnaA08G0083600ZS;BnaC01G0252100ZS;BnaC02G0357300ZS;BnaC02G0357600ZS;BnaC03G0…	K00128+K00128+K00128+K00128+K00128+K00128+K00128+K00128+K00128+K00128+K00232+K00232+K00276+K00276+K00276+K00276+K00276+K00276+K00276+K00276+K00276+K00276+K00276+K00276+K00276+K00276+K01431+K01578+K01578+K01580+K01580+K01580+K01580+K01580+K01580+K01580+K01580+K01580+K05605+K05605+K05605+K05605+K05605+K05605+K05605+K12259+K12259+K13366+K13366+K14085+K14085+K14085+K14085+K14085+K14085+K14085+K14085+…	https:\\www.genome.jp\dbget-bin\www_bget?map00410
Terpenoid backbone biosynthesis	ko00900	49 out of 6277 0.780627688386172%	236 out of 32833 0.718789023238815%	0.283247	1	BnaA02G0221800ZS;BnaC02G0298800ZS;BnaC06G0425300ZS;BnaA06G0281100ZS;BnaC03G0549800ZS;BnaC09G0250500ZS;BnaA02G0371900ZS;BnaC02G0498100ZS;BnaA07G0152500ZS;BnaC04G0210200ZS;BnaA02G0323600ZS;BnaA03G0368100ZS;BnaC01G0246000ZS;BnaC07G0401700ZS;BnaC09G0146100ZS;BnaC09G0159500ZS;BnaA09G0136300ZS;BnaA09G0147000ZS;BnaA07G0384300ZS;BnaC09G0441000ZS;BnaA10G0158300ZS;BnaA01G0038500ZS;BnaA08G0135800ZS;BnaC01G0…	K00021+K00021+K00021+K00099+K00099+K00626+K00869+K00869+K00919+K00919+K00991+K01662+K01662+K01662+K01770+K01770+K01770+K01770+K01823+K03526+K03526+K03527+K03527+K03527+K03527+K05356+K05356+K05356+K05356+K10960+K10960+K10960+K10960+K11778+K11778+K11778+K11778+K11778+K11778+K13789+K13789+K13789+K13789+K14066+K14066+K15892+K15892+K15892+K15892	https:\\www.genome.jp\dbget-bin\www_bget?map00900
Fatty acid degradation	ko00071	57 out of 6277 0.9080771068982%	277 out of 32833 0.843663387445558%	0.28961	1	BnaC08G0450700ZS;BnaA02G0383900ZS;BnaA09G0597200ZS;BnaC02G0514000ZS;BnaC08G0272600ZS;BnaA01G0121600ZS;BnaA07G0122900ZS;BnaA09G0461800ZS;BnaC07G0180700ZS;BnaC08G0284400ZS;BnaA01G0039400ZS;BnaA03G0554200ZS;BnaA06G0170700ZS;BnaA08G0182200ZS;BnaC01G0027700ZS;BnaC01G0045100ZS;BnaC03G0694900ZS;BnaC05G0208700ZS;BnaC07G0530700ZS;BnaC08G0320100ZS;BnaC03G0198000ZS;BnaC09G0250500ZS;BnaA03G0376800ZS;BnaA04G0…	K00001+K00001+K00001+K00001+K00121+K00121+K00121+K00121+K00121+K00128+K00128+K00128+K00128+K00128+K00128+K00128+K00128+K00128+K00128+K00232+K00232+K00626+K01897+K01897+K01897+K01897+K01897+K01897+K01897+K01897+K01897+K01897+K10527+K10527+K14085+K14085+K14085+K14085+K14085+K14085+K14085+K14085+K14085+K14085+K14085+K14085+K14085+K14085+K15401+K15401+K15401+K15401+K18857+K18857+K20495+K20495+K20495	https:\\www.genome.jp\dbget-bin\www_bget?map00071
Ascorbate and aldarate metabolism	ko00053	88 out of 6277 1.40194360363231%	436 out of 32833 1.32793226327171%	0.302466	1	BnaA02G0400100ZS;BnaC02G0532200ZS;novel.1193;BnaC09G0509300ZS;BnaA02G0059400ZS;BnaA07G0170000ZS;BnaA10G0208700ZS;BnaC06G0160700ZS;BnaA02G0040600ZS;BnaA05G0011700ZS;BnaA05G0011800ZS;BnaA05G0011900ZS;BnaC02G0046800ZS;BnaC04G0009000ZS;BnaC04G0012200ZS;BnaC04G0012300ZS;BnaC04G0012400ZS;novel.5240;BnaC08G0284400ZS;BnaA01G0039400ZS;BnaA03G0554200ZS;BnaA06G0170700ZS;BnaA08G0182200ZS;BnaC01G0027700ZS;Bna…	K00002+K00002+K00002+K00012+K00012+K00012+K00012+K00012+K00103+K00103+K00103+K00103+K00103+K00103+K00103+K00103+K00103+K00103+K00128+K00128+K00128+K00128+K00128+K00128+K00128+K00128+K00128+K00128+K00225+K00423+K00423+K00423+K00423+K00423+K00434+K00434+K00434+K00434+K00434+K00434+K00434+K00434+K00434+K00434+K00434+K00434+K00469+K00469+K08232+K08232+K08679+K10046+K10046+K12447+K12447+K12447+K12447+…	https:\\www.genome.jp\dbget-bin\www_bget?map00053
Histidine metabolism	ko00340	37 out of 6277 0.58945356061813%	182 out of 32833 0.554320348429933%	0.367136	1	BnaC08G0284400ZS;BnaA01G0039400ZS;BnaA03G0554200ZS;BnaA06G0170700ZS;BnaA08G0182200ZS;BnaC01G0027700ZS;BnaC01G0045100ZS;BnaC03G0694900ZS;BnaC05G0208700ZS;BnaC07G0530700ZS;BnaC09G0198100ZS;BnaA06G0060300ZS;BnaC04G0223700ZS;BnaC05G0075600ZS;BnaC03G0202500ZS;novel.533;novel.5916;novel.6051;novel.6232;novel.6265;novel.6691;novel.6696;novel.6994;novel.8923;novel.8954;novel.865;novel.947;novel.967;novel…	K00128+K00128+K00128+K00128+K00128+K00128+K00128+K00128+K00128+K00128+K00765+K00765+K00765+K00765+K01814+K14085+K14085+K14085+K14085+K14085+K14085+K14085+K14085+K14085+K14085+K14085+K14085+K14085+K14085+K14152+K14152+K14152+K14152+K14152+K14152+K14152+K14152	https:\\www.genome.jp\dbget-bin\www_bget?map00340
One carbon pool by folate	ko00670	23 out of 6277 0.366417078222081%	111 out of 32833 0.338074498218256%	0.370165	1	BnaA03G0327600ZS;BnaC03G0393200ZS;BnaA01G0011100ZS;BnaA07G0264400ZS;BnaA07G0325000ZS;BnaA08G0052000ZS;BnaA08G0189700ZS;BnaC01G0013200ZS;BnaC01G0062600ZS;BnaC03G0684400ZS;BnaA07G0288000ZS;BnaC06G0330000ZS;BnaC08G0212500ZS;BnaC08G0510600ZS;BnaA08G0282000ZS;BnaA09G0651400ZS;BnaC01G0338000ZS;BnaA01G0177800ZS;BnaC01G0228200ZS;BnaC07G0375300ZS;BnaA07G0242300ZS;BnaC06G0265300ZS;BnaC03G0285500ZS	K00288+K00288+K00600+K00600+K00600+K00600+K00600+K00600+K00600+K00600+K00604+K00604+K00605+K00605+K00605+K00605+K00605+K01433+K01433+K01433+K01934+K01934+K13998	https:\\www.genome.jp\dbget-bin\www_bget?map00670
Monobactam biosynthesis	ko00261	12 out of 6277 0.191174127768042%	56 out of 32833 0.17056010720921%	0.381263	1	BnaA06G0098000ZS;BnaA03G0215200ZS;BnaA02G0130700ZS;BnaC02G0163200ZS;BnaA04G0286700ZS;BnaC04G0604800ZS;BnaA01G0105600ZS;BnaC04G0230200ZS;BnaA01G0203700ZS;BnaA06G0140400ZS;BnaA06G0440400ZS;BnaC07G0222000ZS	K00133+K00215+K00928+K00928+K01714+K01714+K12524+K12524+K13811+K13811+K13811+K13811	https:\\www.genome.jp\dbget-bin\www_bget?map00261
Diterpenoid biosynthesis	ko00904	26 out of 6277 0.414210610164091%	128 out of 32833 0.389851673621052%	0.399982	1	BnaC09G0013100ZS;BnaA03G0269400ZS;BnaA09G0028500ZS;BnaA07G0382800ZS;BnaA10G0033100ZS;BnaA02G0150000ZS;BnaC02G0192400ZS;BnaA01G0375200ZS;BnaA03G0460000ZS;BnaA08G0206600ZS;BnaC01G0468400ZS;BnaC02G0312300ZS;BnaC03G0661800ZS;BnaC05G0013500ZS;novel.9448;BnaC09G0574300ZS;BnaA02G0024900ZS;BnaA02G0244700ZS;BnaA03G0471800ZS;BnaA10G0260100ZS;BnaC02G0026700ZS;BnaC02G0328200ZS;BnaA05G0007100ZS;BnaC02G0455700…	K04120+K04120+K04120+K04121+K04123+K04124+K04124+K04125+K04125+K04125+K04125+K04125+K04125+K04125+K04125+K05282+K05282+K05282+K05282+K05282+K05282+K05282+K13070+K13070+K13070+K17961	https:\\www.genome.jp\dbget-bin\www_bget?map00904
Taurine and hypotaurine metabolism	ko00430	11 out of 6277 0.175242950454039%	52 out of 32833 0.158377242408552%	0.4083	1	BnaC09G0256000ZS;BnaC09G0491600ZS;BnaA02G0320000ZS;BnaA03G0073800ZS;BnaA09G0220100ZS;BnaA10G0195700ZS;BnaC02G0431900ZS;BnaC03G0084100ZS;BnaC06G0326100ZS;BnaA03G0510200ZS;BnaC07G0488400ZS	K01580+K01580+K01580+K01580+K01580+K01580+K01580+K01580+K01580+K18592+K18592	https:\\www.genome.jp\dbget-bin\www_bget?map00430
Folate biosynthesis	ko00790	26 out of 6277 0.414210610164091%	129 out of 32833 0.392897389821216%	0.41684	1	BnaA01G0386200ZS;BnaA02G0362800ZS;BnaA05G0459900ZS;BnaC01G0492400ZS;BnaA05G0430900ZS;BnaA03G0141300ZS;BnaC03G0163600ZS;BnaC08G0355900ZS;BnaA09G0513800ZS;BnaC01G0479000ZS;BnaC03G0026600ZS;BnaC03G0285500ZS;BnaC08G0444700ZS;BnaA02G0103000ZS;BnaA09G0087700ZS;BnaA09G0592700ZS;BnaC02G0124900ZS;BnaC09G0227700ZS;BnaC09G0227800ZS;BnaA01G0076600ZS;BnaA02G0147700ZS;BnaA09G0197300ZS;BnaA09G0197400ZS;BnaC02G0…	K01495+K01495+K01495+K01495+K01633+K01724+K01724+K01930+K01930+K01930+K01930+K13998+K14652+K14652+K14652+K14652+K14652+K15631+K15631+K15631+K15631+K15631+K15631+K15631+K15631+K18482	https:\\www.genome.jp\dbget-bin\www_bget?map00790
Sphingolipid metabolism	ko00600	61 out of 6277 0.971801816154214%	311 out of 32833 0.94721773825115%	0.434313	1	BnaA01G0212000ZS;BnaA09G0392900ZS;BnaA09G0471600ZS;BnaC05G0282000ZS;BnaC08G0227900ZS;BnaA04G0291400ZS;BnaA02G0029200ZS;BnaC01G0231500ZS;BnaC02G0032200ZS;BnaC08G0308700ZS;BnaC08G0376700ZS;BnaC09G0255600ZS;BnaC09G0256500ZS;BnaC09G0256600ZS;BnaC09G0444300ZS;BnaC09G0444500ZS;BnaA01G0233800ZS;BnaA01G0357700ZS;BnaA02G0095900ZS;BnaA02G0121300ZS;BnaA02G0286300ZS;BnaA02G0320500ZS;BnaA02G0418100ZS;BnaA06G0…	K04708+K04708+K04708+K04708+K04713+K04715+K07407+K07407+K07407+K12309+K12309+K12309+K12309+K12309+K12309+K12309+K12309+K12309+K12309+K12309+K12309+K12309+K12309+K12309+K12309+K12309+K12309+K12309+K12309+K12309+K12309+K12309+K12309+K12309+K12309+K12309+K12309+K12309+K12309+K12309+K12309+K12309+K12309+K12309+K12309+K12309+K12309+K12309+K12309+K12309+K12309+K12349+K12349+K12349+K12382+K12382+K17108+…	https:\\www.genome.jp\dbget-bin\www_bget?map00600
Valine, leucine and isoleucine biosynthesis	ko00290	23 out of 6277 0.366417078222081%	117 out of 32833 0.356348795419243%	0.477972	1	BnaC02G0325500ZS;BnaA06G0013000ZS;BnaA08G0015300ZS;BnaC06G0076400ZS;BnaC06G0080600ZS;BnaC06G0133500ZS;BnaC08G0199000ZS;BnaC08G0298700ZS;BnaA01G0217100ZS;BnaA06G0032400ZS;BnaA06G0063200ZS;BnaA06G0156700ZS;BnaA08G0027900ZS;BnaC05G0078800ZS;BnaC05G0078900ZS;BnaC08G0469100ZS;BnaA09G0613500ZS;BnaA03G0154100ZS;novel.7232;BnaA05G0036500ZS;BnaC04G0039400ZS;BnaA02G0052200ZS;BnaC02G0060000ZS	K00052+K00053+K00053+K00053+K00053+K00053+K00826+K00826+K00826+K00826+K00826+K00826+K00826+K00826+K00826+K01649+K01649+K01653+K01653+K21359+K21359+K21360+K21360	https:\\www.genome.jp\dbget-bin\www_bget?map00290
Caffeine metabolism	ko00232	2 out of 6277 0.031862354628007%	9 out of 32833 0.0274114458014802%	0.536748	1	BnaA09G0023600ZS;novel.9441	K00106+K00106	https:\\www.genome.jp\dbget-bin\www_bget?map00232
Cysteine and methionine metabolism	ko00270	113 out of 6277 1.8002230364824%	594 out of 32833 1.80915542289769%	0.540356	1	BnaC09G0561100ZS;BnaA02G0032600ZS;BnaA10G0248000ZS;BnaC02G0036000ZS;BnaA01G0039900ZS;BnaA03G0358500ZS;BnaA03G0543100ZS;BnaA08G0136800ZS;BnaC01G0045700ZS;BnaC03G0436800ZS;BnaC03G0747700ZS;BnaC07G0519100ZS;BnaA06G0098000ZS;BnaA09G0569800ZS;BnaC05G0354800ZS;BnaC03G0351200ZS;BnaC05G0549700ZS;BnaC03G0816400ZS;BnaC04G0127200ZS;BnaA05G0106900ZS;BnaA04G0236600ZS;BnaC04G0552000ZS;BnaC07G0171800ZS;BnaC08G0…	K00026+K00026+K00026+K00026+K00058+K00058+K00058+K00058+K00058+K00058+K00058+K00058+K00133+K00547+K00547+K00549+K00549+K00640+K00640+K00641+K00789+K00789+K00797+K00815+K00815+K00815+K00815+K00815+K00815+K00815+K00815+K00815+K00815+K00815+K00826+K00826+K00826+K00826+K00826+K00826+K00826+K00826+K00826+K00827+K00827+K00827+K00831+K00837+K00837+K00928+K00928+K01011+K01011+K01011+K01251+K01251+K01251+…	https:\\www.genome.jp\dbget-bin\www_bget?map00270
Glycerophospholipid metabolism	ko00564	118 out of 6277 1.87987892305241%	622 out of 32833 1.8944354765023%	0.553896	1	BnaA04G0259700ZS;BnaA05G0025400ZS;BnaC04G0027000ZS;BnaC04G0576800ZS;BnaA01G0380700ZS;BnaA05G0326300ZS;BnaA08G0075600ZS;BnaC05G0343500ZS;BnaC08G0107200ZS;BnaC08G0208800ZS;Bnascaffold0025G0008500ZS;BnaA03G0520300ZS;BnaA04G0215000ZS;BnaA05G0108000ZS;BnaA06G0073900ZS;BnaA07G0258700ZS;BnaA07G0333800ZS;BnaA08G0284200ZS;BnaC04G0135100ZS;BnaC04G0526200ZS;BnaC05G0091500ZS;BnaC06G0288800ZS;BnaA01G0070200ZS…	K00006+K00006+K00006+K00006+K00111+K00630+K00630+K00630+K00630+K00655+K00655+K00655+K00655+K00655+K00655+K00655+K00655+K00655+K00655+K00655+K00655+K00655+K00901+K00901+K00901+K00968+K00968+K00968+K00981+K00981+K00981+K00993+K00993+K00993+K00993+K00993+K00993+K00995+K01094+K01094+K01114+K01114+K01115+K01115+K01126+K01126+K01126+K01126+K01126+K01126+K01126+K01613+K01613+K01613+K01613+K01613+K01613+…	https:\\www.genome.jp\dbget-bin\www_bget?map00564
Sulfur metabolism	ko00920	34 out of 6277 0.541660028676119%	182 out of 32833 0.554320348429933%	0.589544	1	BnaA02G0305700ZS;BnaC03G0816400ZS;BnaC04G0127200ZS;BnaA05G0106900ZS;BnaA03G0567200ZS;BnaA08G0192300ZS;BnaC01G0010100ZS;BnaC05G0553300ZS;BnaC07G0541600ZS;BnaA06G0110900ZS;BnaC02G0317300ZS;BnaC05G0137000ZS;BnaC09G0272600ZS;BnaA09G0232500ZS;BnaC09G0041800ZS;BnaA02G0370200ZS;BnaA04G0278900ZS;BnaA05G0479500ZS;BnaA09G0054800ZS;BnaC02G0496100ZS;BnaC04G0597000ZS;BnaC02G0068300ZS;BnaC09G0278900ZS;BnaA01G0…	K00387+K00640+K00640+K00641+K00860+K00860+K00860+K00860+K00860+K01011+K01011+K01011+K01082+K01082+K01738+K01738+K01738+K01738+K01738+K01738+K01738+K01739+K05907+K13811+K13811+K13811+K13811+K15422+K15422+K17285+K17285+K17285+K17285+K17285	https:\\www.genome.jp\dbget-bin\www_bget?map00920
Neomycin, kanamycin and gentamicin biosynthesis	ko00524	4 out of 6277 0.063724709256014%	21 out of 32833 0.0639600402034538%	0.590627	1	BnaA05G0176800ZS;BnaA10G0056100ZS;BnaC06G0022700ZS;novel.9541	K00844+K00844+K00844+K00844	https:\\www.genome.jp\dbget-bin\www_bget?map00524
Inositol phosphate metabolism	ko00562	86 out of 6277 1.3700812490043%	458 out of 32833 1.39493801967533%	0.592974	1	BnaA07G0285200ZS;BnaC06G0327000ZS;BnaA06G0095300ZS;BnaC07G0469700ZS;BnaC06G0052900ZS;BnaC08G0201200ZS;BnaC08G0201500ZS;BnaC08G0421800ZS;BnaA09G0571400ZS;BnaA03G0071100ZS;BnaA08G0139900ZS;BnaC03G0752700ZS;BnaA03G0565400ZS;BnaA01G0354200ZS;BnaC01G0440700ZS;BnaA02G0250100ZS;BnaA03G0277600ZS;BnaA05G0011100ZS;BnaA06G0019800ZS;BnaA09G0006800ZS;BnaA09G0016200ZS;BnaA09G0401200ZS;BnaC02G0335000ZS;BnaC03G0…	K00010+K00010+K00469+K00469+K00888+K00889+K00889+K00889+K00889+K00913+K00913+K00913+K00914+K00921+K00921+K01092+K01092+K01092+K01092+K01092+K01092+K01092+K01092+K01092+K01092+K01092+K01092+K01092+K01099+K01099+K01099+K01099+K01099+K01106+K01110+K01114+K01114+K01803+K01803+K01803+K01803+K01803+K01803+K01803+K01858+K01858+K01858+K01858+K01858+K01858+K01858+K05857+K05857+K05857+K05857+K05857+K05857+…	https:\\www.genome.jp\dbget-bin\www_bget?map00562
Amino sugar and nucleotide sugar metabolism	ko00520	183 out of 6277 2.91540544846264%	970 out of 32833 2.95434471415953%	0.593456	1	BnaC09G0509300ZS;BnaA02G0059400ZS;BnaA07G0170000ZS;BnaA10G0208700ZS;BnaC06G0160700ZS;BnaA02G0245500ZS;BnaA03G0075000ZS;BnaC02G0329100ZS;BnaC03G0085700ZS;BnaA05G0139100ZS;BnaA10G0013600ZS;BnaC05G0015500ZS;BnaA05G0176800ZS;BnaA10G0056100ZS;BnaC06G0022700ZS;novel.9541;BnaC08G0341300ZS;BnaA03G0151300ZS;BnaA04G0021200ZS;BnaA04G0205700ZS;BnaA07G0307500ZS;BnaA09G0500800ZS;BnaA10G0088800ZS;BnaC03G0177100…	K00012+K00012+K00012+K00012+K00012+K00326+K00326+K00326+K00326+K00770+K00770+K00770+K00844+K00844+K00844+K00844+K00847+K00847+K00847+K00847+K00847+K00847+K00847+K00847+K00847+K00847+K00847+K00847+K00963+K00963+K00963+K00966+K00966+K00972+K00972+K00972+K00972+K00975+K00975+K00975+K00975+K00975+K00975+K00975+K00975+K00975+K00975+K00975+K00975+K00975+K00975+K00975+K00975+K00975+K00975+K00975+K00975+…	https:\\www.genome.jp\dbget-bin\www_bget?map00520
Selenocompound metabolism	ko00450	27 out of 6277 0.430141787478095%	145 out of 32833 0.441628849023848%	0.594031	1	BnaA01G0394400ZS;BnaA03G0203500ZS;BnaA04G0105200ZS;BnaA05G0026000ZS;BnaA06G0015200ZS;BnaA07G0174100ZS;BnaA08G0089800ZS;BnaC01G0484900ZS;BnaC03G0240400ZS;BnaC04G0027600ZS;BnaC04G0388100ZS;BnaC06G0166900ZS;BnaC08G0128300ZS;novel.4417;novel.8919;BnaC03G0351200ZS;BnaC05G0549700ZS;BnaC02G0068300ZS;BnaC08G0369300ZS;BnaC08G0353400ZS;BnaA09G0511800ZS;BnaA06G0050700ZS;BnaC05G0063300ZS;BnaA01G0203700ZS;Bna…	K00384+K00384+K00384+K00384+K00384+K00384+K00384+K00384+K00384+K00384+K00384+K00384+K00384+K00384+K00384+K00549+K00549+K01739+K01760+K01874+K01874+K11717+K11717+K13811+K13811+K13811+K13811	https:\\www.genome.jp\dbget-bin\www_bget?map00450
Other types of O-glycan biosynthesis	ko00514	14 out of 6277 0.223036482396049%	77 out of 32833 0.234520147412664%	0.628293	1	novel.9553;BnaC08G0293100ZS;BnaA06G0323800ZS;BnaA07G0215000ZS;BnaA09G0555300ZS;BnaA10G0052000ZS;BnaC05G0052000ZS;BnaC06G0229200ZS;BnaC09G0526200ZS;BnaC08G0253100ZS;BnaC08G0463000ZS;BnaC06G0273500ZS;BnaC08G0232100ZS;BnaA08G0269500ZS	K09667+K13667+K13667+K13667+K13667+K13667+K13667+K13667+K20782+K20783+K20783+K20783+K20784+K20784	https:\\www.genome.jp\dbget-bin\www_bget?map00514
Valine, leucine and isoleucine degradation	ko00280	63 out of 6277 1.00366417078222%	340 out of 32833 1.03554350805592%	0.630917	1	BnaA02G0407800ZS;BnaA06G0293000ZS;BnaA10G0249100ZS;BnaC02G0541900ZS;BnaC03G0533400ZS;BnaC08G0284400ZS;BnaA01G0039400ZS;BnaA03G0554200ZS;BnaA06G0170700ZS;BnaA08G0182200ZS;BnaC01G0027700ZS;BnaC01G0045100ZS;BnaC03G0694900ZS;BnaC05G0208700ZS;BnaC07G0530700ZS;BnaA06G0151600ZS;BnaC05G0184400ZS;BnaC03G0419600ZS;BnaC06G0024800ZS;BnaC09G0250500ZS;BnaC08G0199000ZS;BnaC08G0298700ZS;BnaA01G0217100ZS;BnaA06G0…	K00020+K00020+K00020+K00020+K00020+K00128+K00128+K00128+K00128+K00128+K00128+K00128+K00128+K00128+K00128+K00166+K00166+K00382+K00382+K00626+K00826+K00826+K00826+K00826+K00826+K00826+K00826+K00826+K00826+K00827+K00827+K00827+K01640+K01968+K01968+K01968+K01968+K01968+K01968+K01968+K01968+K01968+K05605+K05605+K05605+K05605+K05605+K05605+K05605+K14085+K14085+K14085+K14085+K14085+K14085+K14085+K14085+…	https:\\www.genome.jp\dbget-bin\www_bget?map00280
Arginine and proline metabolism	ko00330	77 out of 6277 1.22670065317827%	415 out of 32833 1.26397222306825%	0.635179	1	BnaC08G0284400ZS;BnaA01G0039400ZS;BnaA03G0554200ZS;BnaA06G0170700ZS;BnaA08G0182200ZS;BnaC01G0027700ZS;BnaC01G0045100ZS;BnaC03G0694900ZS;BnaC05G0208700ZS;BnaC07G0530700ZS;BnaC09G0324500ZS;BnaA03G0060400ZS;BnaC04G0175600ZS;BnaC09G0031900ZS;BnaA08G0248000ZS;BnaC03G0363000ZS;BnaC03G0507000ZS;BnaC05G0172300ZS;novel.3470;BnaC07G0171800ZS;BnaC08G0528200ZS;BnaA06G0039800ZS;BnaA09G0663700ZS;BnaC06G0030900…	K00128+K00128+K00128+K00128+K00128+K00128+K00128+K00128+K00128+K00128+K00286+K00286+K00286+K00318+K00472+K00472+K00472+K00472+K00472+K00797+K01426+K01426+K01426+K01426+K01583+K01611+K10536+K12259+K12259+K12657+K12657+K13366+K13366+K13427+K13427+K13427+K13427+K14085+K14085+K14085+K14085+K14085+K14085+K14085+K14085+K14085+K14085+K14085+K14085+K14085+K14085+K14329+K14329+K14329+K14329+K14329+K14329+…	https:\\www.genome.jp\dbget-bin\www_bget?map00330
Biosynthesis of various secondary metabolites - part 2	ko00998	1 out of 6277 0.0159311773140035%	5 out of 32833 0.0152285810008223%	0.653878	1	BnaC05G0345000ZS	K21568	https:\\www.genome.jp\dbget-bin\www_bget?map00998
Phosphonate and phosphinate metabolism	ko00440	9 out of 6277 0.143380595826032%	52 out of 32833 0.158377242408552%	0.68451	1	BnaA01G0198600ZS;BnaC01G0250800ZS;BnaC06G0145400ZS;BnaC08G0224100ZS;BnaC08G0497700ZS;BnaA06G0087000ZS;BnaA08G0274600ZS;BnaC02G0446700ZS;BnaC07G0288600ZS	K00968+K00968+K00968+K00993+K00993+K00993+K00993+K00993+K00993	https:\\www.genome.jp\dbget-bin\www_bget?map00440
2-Oxocarboxylic acid metabolism	ko01210	63 out of 6277 1.00366417078222%	349 out of 32833 1.0629549538574%	0.715128	1	BnaC02G0325500ZS;BnaA06G0013000ZS;BnaA08G0015300ZS;BnaC06G0076400ZS;BnaC06G0080600ZS;BnaC06G0133500ZS;BnaA06G0098000ZS;novel.6774;BnaA07G0387600ZS;BnaC08G0199000ZS;BnaC08G0298700ZS;BnaA01G0217100ZS;BnaA06G0032400ZS;BnaA06G0063200ZS;BnaA06G0156700ZS;BnaA08G0027900ZS;BnaC05G0078800ZS;BnaC05G0078900ZS;BnaA02G0130700ZS;BnaC02G0163200ZS;BnaC08G0384900ZS;BnaC02G0072400ZS;BnaC04G0289100ZS;BnaC08G0469100…	K00052+K00053+K00053+K00053+K00053+K00053+K00133+K00814+K00818+K00826+K00826+K00826+K00826+K00826+K00826+K00826+K00826+K00826+K00928+K00928+K01647+K01647+K01647+K01649+K01649+K01653+K01653+K11812+K11813+K11819+K12154+K12154+K12156+K12156+K14272+K14272+K14272+K14272+K14272+K14272+K14454+K14454+K14454+K14454+K14454+K14454+K14454+K14455+K14682+K15741+K15741+K15741+K15741+K15741+K15741+K21346+K21346+…	https:\\www.genome.jp\dbget-bin\www_bget?map01210
Aflatoxin biosynthesis	ko00254	1 out of 6277 0.0159311773140035%	6 out of 32833 0.0182742972009868%	0.72006	1	BnaA08G0066900ZS	K11262	https:\\www.genome.jp\dbget-bin\www_bget?map00254
Butanoate metabolism	ko00650	20 out of 6277 0.31862354628007%	117 out of 32833 0.356348795419243%	0.746018	1	BnaC08G0366500ZS;BnaC09G0250500ZS;BnaC09G0256000ZS;BnaC09G0491600ZS;BnaA02G0320000ZS;BnaA03G0073800ZS;BnaA09G0220100ZS;BnaA10G0195700ZS;BnaC02G0431900ZS;BnaC03G0084100ZS;BnaC06G0326100ZS;BnaC04G0210400ZS;BnaA03G0154100ZS;novel.7232;BnaA07G0027200ZS;BnaC07G0051400ZS;BnaA05G0338300ZS;BnaC05G0361300ZS;BnaA06G0121200ZS;BnaC05G0149200ZS	K00109+K00626+K01580+K01580+K01580+K01580+K01580+K01580+K01580+K01580+K01580+K01640+K01653+K01653+K01913+K01913+K16871+K16871+K18121+K18121	https:\\www.genome.jp\dbget-bin\www_bget?map00650
Biosynthesis of unsaturated fatty acids	ko01040	14 out of 6277 0.223036482396049%	84 out of 32833 0.255840160813815%	0.756914	1	BnaC08G0320100ZS;BnaC03G0198000ZS;BnaC09G0501100ZS;BnaA09G0228200ZS;BnaC04G0043700ZS;BnaA07G0102200ZS;BnaC07G0154300ZS;novel.3403;BnaC01G0461200ZS;BnaC08G0352800ZS;BnaC09G0552800ZS;BnaA02G0102800ZS;BnaA10G0242100ZS;BnaC03G0047500ZS	K00232+K00232+K03921+K03921+K03921+K10251+K10251+K10251+K10256+K10258+K10703+K10703+K10703+K10703	https:\\www.genome.jp\dbget-bin\www_bget?map01040
Sesquiterpenoid and triterpenoid biosynthesis	ko00909	21 out of 6277 0.334554723594074%	125 out of 32833 0.380714525020559%	0.777798	1	BnaC09G0058800ZS;BnaA01G0012500ZS;BnaA02G0387500ZS;BnaA02G0387600ZS;BnaA04G0056500ZS;BnaA06G0326600ZS;BnaA06G0326700ZS;BnaA09G0068700ZS;BnaC01G0014800ZS;BnaC02G0518400ZS;BnaC02G0518900ZS;BnaC07G0367400ZS;novel.1677;novel.2234;BnaA03G0578700ZS;BnaA03G0578800ZS;BnaC07G0369300ZS;BnaC09G0479400ZS;BnaC06G0253500ZS;BnaA09G0590000ZS;BnaA05G0356700ZS	K00511+K00511+K00511+K00511+K00511+K00511+K00511+K00511+K00511+K00511+K00511+K00511+K14175+K14175+K14184+K14184+K14184+K15799+K15815+K16204+K16206	https:\\www.genome.jp\dbget-bin\www_bget?map00909
Protein export	ko03060	56 out of 6277 0.892145929584196%	323 out of 32833 0.983766332653123%	0.812188	1	BnaC08G0267500ZS;BnaA03G0274500ZS;BnaA07G0103100ZS;BnaA08G0242900ZS;BnaC03G0330900ZS;BnaA07G0066800ZS;BnaC07G0100500ZS;novel.9835;BnaC09G0607200ZS;BnaA02G0014700ZS;BnaA10G0287900ZS;BnaC02G0011700ZS;BnaC02G0014400ZS;BnaA04G0288800ZS;BnaA04G0288900ZS;BnaA05G0055100ZS;BnaA05G0055200ZS;BnaC04G0061400ZS;BnaC04G0061500ZS;BnaC04G0607200ZS;BnaC04G0607300ZS;BnaC09G0040300ZS;BnaA02G0145300ZS;BnaA03G0134700…	K03070+K03070+K03070+K03070+K03070+K03100+K03100+K03105+K03106+K03106+K03106+K03106+K03106+K03110+K03110+K03110+K03110+K03110+K03110+K03110+K03110+K03116+K03116+K03116+K03116+K03116+K03116+K03116+K03116+K03116+K03118+K03118+K03118+K03118+K03217+K03217+K03217+K03217+K07342+K09481+K09481+K09481+K09490+K09490+K09490+K09648+K09648+K09648+K10956+K10956+K10956+K10956+K10956+K10956+K10956+K13280	https:\\www.genome.jp\dbget-bin\www_bget?map03060
Lipoic acid metabolism	ko00785	2 out of 6277 0.031862354628007%	18 out of 32833 0.0548228916029604%	0.884754	1	BnaC03G0040000ZS;BnaC01G0076900ZS	K03644+K03801	https:\\www.genome.jp\dbget-bin\www_bget?map00785
Pyruvate metabolism	ko00620	99 out of 6277 1.57718655408635%	574 out of 32833 1.74824109889441%	0.88658	1	BnaC08G0450700ZS;BnaA02G0383900ZS;BnaA09G0597200ZS;BnaC02G0514000ZS;BnaA02G0400100ZS;BnaC02G0532200ZS;novel.1193;BnaC09G0561100ZS;BnaA02G0032600ZS;BnaA10G0248000ZS;BnaC02G0036000ZS;BnaC03G0052300ZS;BnaC09G0416100ZS;BnaA02G0111100ZS;BnaA03G0107100ZS;BnaA10G0138800ZS;BnaC02G0136200ZS;BnaC03G0123700ZS;BnaC08G0272600ZS;BnaA01G0121600ZS;BnaA07G0122900ZS;BnaA09G0461800ZS;BnaC07G0180700ZS;BnaC08G0284400…	K00001+K00001+K00001+K00001+K00002+K00002+K00002+K00026+K00026+K00026+K00026+K00029+K00051+K00051+K00051+K00051+K00051+K00051+K00121+K00121+K00121+K00121+K00121+K00128+K00128+K00128+K00128+K00128+K00128+K00128+K00128+K00128+K00128+K00382+K00382+K00626+K00873+K00873+K00873+K00873+K00873+K00873+K00873+K00873+K00873+K00873+K01006+K01006+K01006+K01006+K01069+K01069+K01512+K01595+K01595+K01595+K01595+…	https:\\www.genome.jp\dbget-bin\www_bget?map00620
Arachidonic acid metabolism	ko00590	22 out of 6277 0.350485900908077%	145 out of 32833 0.441628849023848%	0.909135	1	BnaC08G0428600ZS;BnaA02G0266400ZS;BnaA03G0529000ZS;BnaA07G0222500ZS;BnaA09G0015300ZS;BnaA09G0577200ZS;BnaC04G0257400ZS;BnaC06G0239400ZS;BnaC07G0506700ZS;BnaC09G0525900ZS;BnaA10G0221300ZS;BnaA03G0430800ZS;BnaA03G0431200ZS;BnaA05G0330100ZS;BnaC07G0404900ZS;BnaA02G0014900ZS;BnaC02G0014700ZS;BnaC05G0198000ZS;novel.9444;novel.3553;BnaA03G0510200ZS;BnaC07G0488400ZS	K00432+K00432+K00432+K00432+K00432+K00432+K00432+K00432+K00432+K01254+K01254+K08726+K08726+K08726+K08726+K14674+K14674+K15730+K15730+K15730+K18592+K18592	https:\\www.genome.jp\dbget-bin\www_bget?map00590
Lysine biosynthesis	ko00300	13 out of 6277 0.207105305082046%	92 out of 32833 0.280205890415131%	0.916004	1	BnaA06G0098000ZS;BnaA03G0215200ZS;BnaA02G0130700ZS;BnaC02G0163200ZS;BnaA04G0286700ZS;BnaC04G0604800ZS;BnaC08G0337400ZS;BnaA02G0387000ZS;BnaA03G0391700ZS;BnaA08G0140100ZS;BnaC03G0484900ZS;BnaA01G0105600ZS;BnaC04G0230200ZS	K00133+K00215+K00928+K00928+K01714+K01714+K01778+K10206+K10206+K10206+K10206+K12524+K12524	https:\\www.genome.jp\dbget-bin\www_bget?map00300
Glycosphingolipid biosynthesis - globo and isoglobo series	ko00603	6 out of 6277 0.095587063884021%	48 out of 32833 0.146194377607894%	0.918069	1	BnaA01G0363000ZS;BnaC01G0453100ZS;BnaA02G0029200ZS;BnaC01G0231500ZS;BnaC02G0032200ZS;BnaA09G0680300ZS	K01988+K01988+K07407+K07407+K07407+K12373	https:\\www.genome.jp\dbget-bin\www_bget?map00603
Purine metabolism	ko00230	94 out of 6277 1.49753066751633%	557 out of 32833 1.69646392349161%	0.922639	1	BnaA07G0382900ZS;BnaA09G0023600ZS;novel.9441;BnaC09G0545300ZS;BnaA02G0038800ZS;BnaA10G0237800ZS;BnaC02G0043700ZS;BnaC06G0241900ZS;BnaC06G0458900ZS;BnaA07G0036400ZS;BnaC01G0040600ZS;BnaC08G0524900ZS;BnaA01G0168800ZS;BnaA03G0498800ZS;BnaC01G0216900ZS;BnaC07G0477200ZS;BnaA03G0567200ZS;BnaA08G0192300ZS;BnaC01G0010100ZS;BnaC05G0553300ZS;BnaC07G0541600ZS;BnaC08G0499200ZS;BnaA01G0219900ZS;BnaA06G0287900…	K00088+K00106+K00106+K00759+K00759+K00759+K00759+K00759+K00759+K00764+K00764+K00856+K00856+K00856+K00856+K00856+K00860+K00860+K00860+K00860+K00860+K00873+K00873+K00873+K00873+K00873+K00873+K00873+K00873+K00873+K00873+K00939+K00939+K00939+K00939+K00939+K00939+K00939+K00940+K00940+K00940+K00940+K00940+K00942+K00948+K00951+K00951+K00951+K00951+K01081+K01466+K01510+K01510+K01510+K01510+K01510+K01513+…	https:\\www.genome.jp\dbget-bin\www_bget?map00230
Sulfur relay system	ko04122	5 out of 6277 0.0796558865700175%	44 out of 32833 0.134011512807237%	0.941648	1	BnaA06G0110900ZS;BnaC02G0317300ZS;BnaC05G0137000ZS;Bnascaffold2895G0000100ZS;BnaC02G0094000ZS	K01011+K01011+K01011+K11996+K11996	https:\\www.genome.jp\dbget-bin\www_bget?map04122
Glycosphingolipid biosynthesis - lacto and neolacto series	ko00601	2 out of 6277 0.031862354628007%	24 out of 32833 0.0730971888039472%	0.959053	1	BnaA01G0363000ZS;BnaC01G0453100ZS	K01988+K01988	https:\\www.genome.jp\dbget-bin\www_bget?map00601
Synthesis and degradation of ketone bodies	ko00072	2 out of 6277 0.031862354628007%	24 out of 32833 0.0730971888039472%	0.959053	1	BnaC09G0250500ZS;BnaC04G0210400ZS	K00626+K01640	https:\\www.genome.jp\dbget-bin\www_bget?map00072
Ether lipid metabolism	ko00565	20 out of 6277 0.31862354628007%	144 out of 32833 0.438583132823683%	0.960369	1	BnaC08G0224100ZS;BnaC08G0497700ZS;BnaA06G0087000ZS;BnaA08G0274600ZS;BnaC02G0446700ZS;BnaC07G0288600ZS;BnaC09G0079600ZS;BnaA09G0085500ZS;BnaA01G0408800ZS;BnaC05G0052100ZS;BnaC01G0032200ZS;BnaC03G0452600ZS;BnaA06G0301400ZS;BnaC02G0038500ZS;BnaC03G0524500ZS;BnaC07G0034000ZS;BnaA02G0014900ZS;BnaC02G0014700ZS;BnaA06G0334300ZS;BnaC07G0360200ZS	K00993+K00993+K00993+K00993+K00993+K00993+K01062+K01062+K01114+K01114+K01115+K01115+K06123+K06123+K06123+K13519+K14674+K14674+K16860+K16860	https:\\www.genome.jp\dbget-bin\www_bget?map00565
Pyrimidine metabolism	ko00240	56 out of 6277 0.892145929584196%	361 out of 32833 1.09950354825937%	0.96814	1	BnaC08G0340100ZS;BnaA09G0499700ZS;BnaA01G0159500ZS;BnaA08G0002600ZS;BnaC01G0204000ZS;BnaC03G0815100ZS;BnaA06G0285000ZS;BnaA09G0083500ZS;BnaC01G0173400ZS;BnaC01G0173500ZS;BnaC03G0544700ZS;BnaC02G0489800ZS;BnaC09G0476100ZS;BnaA10G0184800ZS;BnaC04G0102100ZS;BnaC08G0018600ZS;BnaA09G0087900ZS;BnaA07G0010500ZS;BnaC08G0159800ZS;BnaC08G0492600ZS;BnaA08G0175500ZS;BnaC01G0178000ZS;BnaC05G0113300ZS;BnaC08G0…	K00761+K00761+K00876+K00876+K00876+K00876+K00940+K00940+K00940+K00940+K00940+K01081+K01240+K01240+K01240+K01240+K01431+K01489+K01510+K01510+K01510+K01510+K01510+K01513+K01513+K01513+K01513+K01513+K01513+K01513+K01513+K01513+K01513+K01513+K01513+K01513+K01513+K01513+K01513+K01513+K01937+K03787+K03787+K03787+K03787+K03787+K09903+K09903+K09903+K09903+K10807+K13800+K13998+K14641+K16904+K16904	https:\\www.genome.jp\dbget-bin\www_bget?map00240
Phosphatidylinositol signaling system	ko04070	75 out of 6277 1.19483829855026%	471 out of 32833 1.43453233027746%	0.968956	1	BnaC06G0052900ZS;BnaC08G0201200ZS;BnaC08G0201500ZS;BnaC08G0421800ZS;BnaA09G0571400ZS;BnaA01G0070200ZS;BnaA03G0502500ZS;BnaC01G0083300ZS;BnaA03G0071100ZS;BnaA08G0139900ZS;BnaC03G0752700ZS;BnaA03G0565400ZS;BnaA01G0354200ZS;BnaC01G0440700ZS;BnaC08G0397600ZS;BnaA09G0551100ZS;BnaC01G0206900ZS;BnaA02G0250100ZS;BnaA03G0277600ZS;BnaA05G0011100ZS;BnaA06G0019800ZS;BnaA09G0006800ZS;BnaA09G0016200ZS;BnaA09G0…	K00888+K00889+K00889+K00889+K00889+K00901+K00901+K00901+K00913+K00913+K00913+K00914+K00921+K00921+K00981+K00981+K00981+K01092+K01092+K01092+K01092+K01092+K01092+K01092+K01092+K01092+K01092+K01092+K01092+K01092+K01099+K01099+K01099+K01099+K01099+K01106+K01110+K02183+K02183+K02183+K02183+K02183+K02183+K02183+K02183+K05857+K05857+K05857+K05857+K05857+K05857+K05857+K05857+K05857+K05857+K05857+K10572+…	https:\\www.genome.jp\dbget-bin\www_bget?map04070
Fatty acid biosynthesis	ko00061	29 out of 6277 0.462004142106102%	213 out of 32833 0.648737550635032%	0.986509	1	BnaA10G0189700ZS;BnaC04G0364400ZS;BnaC05G0554900ZS;BnaC09G0135500ZS;BnaA03G0402300ZS;BnaC07G0374000ZS;BnaA03G0376800ZS;BnaA04G0054300ZS;BnaA04G0297500ZS;BnaA05G0006100ZS;BnaA05G0470300ZS;BnaA06G0348800ZS;BnaC03G0461600ZS;BnaC04G0007500ZS;BnaC04G0356100ZS;BnaC04G0614600ZS;BnaC09G0509200ZS;BnaA10G0208500ZS;BnaC03G0078600ZS;BnaA02G0035300ZS;BnaC02G0039300ZS;BnaC09G0501100ZS;BnaA09G0228200ZS;BnaC04G0…	K00059+K00059+K00059+K00648+K00648+K00648+K01897+K01897+K01897+K01897+K01897+K01897+K01897+K01897+K01897+K01897+K02160+K02160+K02160+K02372+K02372+K03921+K03921+K03921+K09458+K10781+K10781+K10782+K11262	https:\\www.genome.jp\dbget-bin\www_bget?map00061
Non-homologous end-joining	ko03450	1 out of 6277 0.0159311773140035%	21 out of 32833 0.0639600402034538%	0.988406	1	BnaC08G0202600ZS	K03512	https:\\www.genome.jp\dbget-bin\www_bget?map03450
Fatty acid metabolism	ko01212	44 out of 6277 0.700971801816154%	312 out of 32833 0.950263454451314%	0.992063	1	BnaA10G0189700ZS;BnaC04G0364400ZS;BnaC05G0554900ZS;BnaC08G0320100ZS;BnaC03G0198000ZS;BnaC09G0250500ZS;BnaC09G0135500ZS;BnaA03G0402300ZS;BnaC07G0374000ZS;BnaA01G0177200ZS;BnaC01G0227100ZS;BnaA03G0376800ZS;BnaA04G0054300ZS;BnaA04G0297500ZS;BnaA05G0006100ZS;BnaA05G0470300ZS;BnaA06G0348800ZS;BnaC03G0461600ZS;BnaC04G0007500ZS;BnaC04G0356100ZS;BnaC04G0614600ZS;BnaC09G0509200ZS;BnaA10G0208500ZS;BnaC03G0…	K00059+K00059+K00059+K00232+K00232+K00626+K00648+K00648+K00648+K01074+K01074+K01897+K01897+K01897+K01897+K01897+K01897+K01897+K01897+K01897+K01897+K02160+K02160+K02160+K02372+K02372+K03921+K03921+K03921+K09458+K10251+K10251+K10251+K10256+K10258+K10527+K10527+K10703+K10703+K10703+K10703+K10781+K10781+K11262	https:\\www.genome.jp\dbget-bin\www_bget?map01212
Base excision repair	ko03410	27 out of 6277 0.430141787478095%	207 out of 32833 0.630463253434045%	0.992102	1	BnaA01G0365400ZS;BnaA02G0288700ZS;BnaA06G0088200ZS;BnaC02G0393300ZS;BnaC05G0108100ZS;BnaC05G0064500ZS;BnaA01G0138000ZS;BnaA05G0175400ZS;BnaA09G0377100ZS;BnaC01G0176400ZS;BnaC05G0294800ZS;BnaC05G0385300ZS;BnaC06G0099800ZS;BnaC08G0202600ZS;BnaA07G0294400ZS;BnaC06G0339600ZS;BnaC06G0121600ZS;BnaC08G0202100ZS;BnaC08G0519200ZS;BnaA02G0173100ZS;BnaA07G0290700ZS;BnaA08G0288600ZS;BnaA09G0657700ZS;BnaC02G0…	K01246+K01246+K01246+K01246+K01246+K02327+K02335+K02335+K02335+K02335+K02335+K02335+K02335+K03512+K03648+K03648+K10563+K10773+K10773+K10773+K10773+K10773+K10773+K10773+K10773+K10773+K10798	https:\\www.genome.jp\dbget-bin\www_bget?map03410
C5-Branched dibasic acid metabolism	ko00660	3 out of 6277 0.0477935319420105%	43 out of 32833 0.130965796607072%	0.993306	1	BnaC02G0325500ZS;BnaA03G0154100ZS;novel.7232	K00052+K01653+K01653	https:\\www.genome.jp\dbget-bin\www_bget?map00660
Propanoate metabolism	ko00640	20 out of 6277 0.31862354628007%	172 out of 32833 0.523863186428289%	0.996991	1	BnaA06G0151600ZS;BnaC05G0184400ZS;BnaC08G0320100ZS;BnaC03G0198000ZS;BnaC03G0419600ZS;BnaC06G0024800ZS;BnaC09G0250500ZS;BnaA05G0351700ZS;novel.1440;BnaC09G0509200ZS;BnaA10G0208500ZS;BnaC03G0078600ZS;BnaC08G0526100ZS;BnaA02G0420000ZS;BnaA04G0189100ZS;BnaA04G0189700ZS;BnaA06G0056200ZS;BnaC05G0070300ZS;BnaC08G0024500ZS;BnaA08G0066900ZS	K00166+K00166+K00232+K00232+K00382+K00382+K00626+K01578+K01578+K02160+K02160+K02160+K05605+K05605+K05605+K05605+K05605+K05605+K05605+K11262	https:\\www.genome.jp\dbget-bin\www_bget?map00640
Lysine degradation	ko00310	34 out of 6277 0.541660028676119%	272 out of 32833 0.828434806444735%	0.998662	1	BnaC08G0284400ZS;BnaA01G0039400ZS;BnaA03G0554200ZS;BnaA06G0170700ZS;BnaA08G0182200ZS;BnaC01G0027700ZS;BnaC01G0045100ZS;BnaC03G0694900ZS;BnaC05G0208700ZS;BnaC07G0530700ZS;BnaC03G0419600ZS;BnaC06G0024800ZS;BnaC09G0250500ZS;BnaA06G0418200ZS;BnaA09G0443600ZS;BnaC05G0219300ZS;Bnascaffold0025G0006300ZS;novel.533;novel.5916;novel.6051;novel.6232;novel.6265;novel.6691;novel.6696;novel.6994;novel.8923;nov…	K00128+K00128+K00128+K00128+K00128+K00128+K00128+K00128+K00128+K00128+K00382+K00382+K00626+K11420+K11426+K11426+K11433+K14085+K14085+K14085+K14085+K14085+K14085+K14085+K14085+K14085+K14085+K14085+K14085+K14085+K14085+K14157+K14157+K23700	https:\\www.genome.jp\dbget-bin\www_bget?map00310
Glycosylphosphatidylinositol (GPI)-anchor biosynthesis	ko00563	15 out of 6277 0.238967659710053%	146 out of 32833 0.444674565224012%	0.998777	1	BnaC01G0033900ZS;BnaC09G0107300ZS;Bnascaffold0157G0000100ZS;BnaA01G0381200ZS;BnaA01G0412300ZS;BnaA03G0393900ZS;BnaA07G0245600ZS;BnaA07G0354800ZS;BnaA09G0459300ZS;BnaC01G0502900ZS;BnaC02G0283900ZS;BnaC03G0488200ZS;BnaC06G0417700ZS;BnaC08G0480100ZS;BnaC09G0160900ZS	K03858+K03860+K03860+K03860+K03860+K03860+K03860+K03860+K03860+K03860+K03860+K03860+K03860+K05287+K05287	https:\\www.genome.jp\dbget-bin\www_bget?map00563
RNA degradation	ko03018	114 out of 6277 1.8161542137964%	762 out of 32833 2.32083574452533%	0.998971	1	BnaA01G0050200ZS;BnaA01G0157600ZS;BnaA02G0026300ZS;BnaA03G0115300ZS;BnaA06G0138600ZS;BnaA06G0138900ZS;BnaA08G0214700ZS;BnaA09G0403800ZS;BnaA09G0404100ZS;BnaA09G0492500ZS;BnaC01G0058900ZS;BnaC01G0096300ZS;BnaC01G0200700ZS;BnaC03G0203900ZS;BnaC03G0649900ZS;BnaC04G0132600ZS;BnaC05G0167600ZS;BnaC05G0268500ZS;BnaC05G0268800ZS;BnaC07G0383400ZS;novel.7275;Bnascaffold2773G0000100ZS;BnaA03G0291900ZS;BnaC0…	K00850+K00850+K00850+K00850+K00850+K00850+K00850+K00850+K00850+K00850+K00850+K00850+K00850+K00850+K00850+K00850+K00850+K00850+K00850+K00850+K00850+K00962+K00962+K00962+K00962+K01148+K01148+K01148+K01148+K01148+K01148+K01148+K01148+K01148+K01148+K01148+K01148+K01689+K01689+K01689+K01689+K01689+K01689+K04043+K04077+K04077+K04077+K04077+K04077+K04077+K04077+K04077+K04077+K04077+K04077+K04077+K04077+…	https:\\www.genome.jp\dbget-bin\www_bget?map03018
Biotin metabolism	ko00780	8 out of 6277 0.127449418512028%	109 out of 32833 0.331983065817927%	0.99985	1	BnaA10G0189700ZS;BnaC04G0364400ZS;BnaC05G0554900ZS;BnaC09G0071600ZS;BnaA02G0035300ZS;BnaC02G0039300ZS;novel.8476;novel.1104	K00059+K00059+K00059+K01942+K02372+K02372+K09458+K19562	https:\\www.genome.jp\dbget-bin\www_bget?map00780
Various types of N-glycan biosynthesis	ko00513	13 out of 6277 0.207105305082046%	167 out of 32833 0.508634605427466%	0.999989	1	BnaC08G0237300ZS;BnaA06G0114500ZS;BnaA08G0264600ZS;BnaC05G0140600ZS;BnaA06G0447400ZS;BnaA08G0195600ZS;BnaC01G0005400ZS;BnaC04G0053500ZS;BnaC04G0414700ZS;novel.1716;novel.3642;BnaC09G0457300ZS;BnaA09G0680300ZS	K03844+K03844+K03844+K03844+K03847+K03847+K03847+K03847+K03847+K03847+K03847+K07441+K12373	https:\\www.genome.jp\dbget-bin\www_bget?map00513
N-Glycan biosynthesis	ko00510	24 out of 6277 0.382348255536084%	250 out of 32833 0.761429050041117%	0.999989	1	BnaA07G0165900ZS;BnaC09G0104600ZS;BnaC09G0517400ZS;BnaA08G0276400ZS;BnaA07G0101300ZS;BnaC07G0153200ZS;BnaC08G0237300ZS;BnaA06G0114500ZS;BnaA08G0264600ZS;BnaC05G0140600ZS;BnaA06G0447400ZS;BnaA08G0195600ZS;BnaC01G0005400ZS;BnaC04G0053500ZS;BnaC04G0414700ZS;novel.1716;novel.3642;BnaA01G0289800ZS;BnaC09G0100200ZS;BnaA09G0100500ZS;BnaC09G0457300ZS;BnaC09G0111200ZS;BnaC03G0495900ZS;BnaC07G0064500ZS	K00729+K00737+K00737+K00737+K01228+K01228+K03844+K03844+K03844+K03844+K03847+K03847+K03847+K03847+K03847+K03847+K03847+K05546+K07252+K07252+K07441+K12345+K12345+K12345	https:\\www.genome.jp\dbget-bin\www_bget?map00510
Phagosome	ko04145	55 out of 6277 0.876214752270193%	490 out of 32833 1.49240093808059%	0.999999	1	BnaA03G0565400ZS;BnaA01G0354200ZS;BnaC01G0440700ZS;BnaA09G0042100ZS;novel.7022;BnaC09G0156900ZS;BnaA09G0145100ZS;BnaC09G0137100ZS;BnaC03G0799500ZS;BnaA01G0081400ZS;BnaA06G0427000ZS;BnaA07G0135400ZS;BnaA07G0355700ZS;BnaA08G0248700ZS;BnaA09G0114100ZS;BnaA09G0477800ZS;BnaC01G0098600ZS;BnaC04G0052800ZS;BnaC07G0197400ZS;BnaC07G0245400ZS;BnaC07G0392700ZS;BnaA03G0246100ZS;BnaA06G0032700ZS;novel.5768;Bna…	K00914+K00921+K00921+K02146+K02147+K02150+K02150+K02154+K02154+K04392+K04392+K04392+K04392+K04392+K04392+K04392+K04392+K04392+K04392+K04392+K04392+K07342+K07374+K07374+K07375+K07375+K07375+K07375+K07375+K07375+K07375+K07375+K07375+K07375+K07375+K07375+K07897+K07897+K07897+K07897+K07897+K07897+K07897+K08057+K08488+K09481+K09481+K09481+K10956+K10956+K10956+K10956+K10956+K10956+K10956	https:\\www.genome.jp\dbget-bin\www_bget?map04145
RNA polymerase	ko03020	26 out of 6277 0.414210610164091%	306 out of 32833 0.931989157250327%	1	1	BnaC02G0314100ZS;novel.4205;novel.39;novel.5138;novel.5604;novel.6114;novel.6384;novel.7150;novel.7194;novel.8224;novel.8336;novel.8863;novel.8947;novel.9276;novel.9476;novel.1146;novel.1703;novel.1741;novel.2539;novel.2700;novel.2792;BnaC03G0725500ZS;BnaC03G0125800ZS;novel.3062;BnaA06G0200300ZS;novel.101	K03006+K03006+K03006+K03006+K03006+K03006+K03006+K03006+K03006+K03006+K03006+K03006+K03006+K03006+K03006+K03006+K03006+K03006+K03006+K03006+K03006+K03010+K03013+K03018+K03046+K03046	https:\\www.genome.jp\dbget-bin\www_bget?map03020
Autophagy - other	ko04136	14 out of 6277 0.223036482396049%	212 out of 32833 0.645691834434867%	1	1	BnaA03G0565400ZS;BnaA08G0034400ZS;BnaA05G0371500ZS;BnaA03G0214700ZS;BnaA05G0041600ZS;BnaC03G0253200ZS;BnaC04G0045400ZS;BnaA08G0117200ZS;BnaC04G0603300ZS;BnaA06G0437700ZS;BnaC09G0372200ZS;BnaA01G0417600ZS;BnaA02G0131700ZS;BnaC01G0497500ZS	K00914+K08269+K08331+K08333+K08333+K08333+K08333+K08341+K08341+K17606+K17908+K17908+K17908+K17908	https:\\www.genome.jp\dbget-bin\www_bget?map04136
Basal transcription factors	ko03022	19 out of 6277 0.302692368966067%	270 out of 32833 0.822343374044406%	1	1	BnaA03G0243300ZS;BnaA06G0283700ZS;BnaA06G0294500ZS;BnaA07G0230200ZS;BnaC02G0454000ZS;BnaC03G0546500ZS;BnaC07G0297300ZS;BnaC07G0457800ZS;BnaC07G0149000ZS;BnaA07G0026100ZS;BnaA09G0113500ZS;BnaA09G0541800ZS;BnaC07G0049900ZS;BnaC09G0283100ZS;BnaC06G0271200ZS;BnaA03G0268400ZS;BnaC03G0322000ZS;BnaA07G0334600ZS;BnaC06G0392600ZS	K03122+K03122+K03122+K03122+K03122+K03122+K03122+K03123+K03129+K03131+K03131+K03131+K03131+K03138+K03139+K06634+K06634+K10844+K10844	https:\\www.genome.jp\dbget-bin\www_bget?map03022
Citrate cycle (TCA cycle)	ko00020	15 out of 6277 0.238967659710053%	274 out of 32833 0.834526238845064%	1	1	BnaC09G0561100ZS;BnaA02G0032600ZS;BnaA10G0248000ZS;BnaC02G0036000ZS;BnaA02G0411700ZS;BnaC03G0419600ZS;BnaC06G0024800ZS;BnaA02G0414700ZS;BnaA06G0306000ZS;BnaC02G0550700ZS;BnaC03G0518500ZS;BnaC08G0384900ZS;BnaC02G0072400ZS;BnaC04G0289100ZS;BnaA08G0287200ZS	K00026+K00026+K00026+K00026+K00235+K00382+K00382+K01610+K01610+K01610+K01610+K01647+K01647+K01647+K01648	https:\\www.genome.jp\dbget-bin\www_bget?map00020
SNARE interactions in vesicular transport	ko04130	7 out of 6277 0.111518241198025%	217 out of 32833 0.66092041543569%	1	1	BnaC08G0184500ZS;BnaA03G0325200ZS;BnaA04G0064000ZS;BnaA06G0051300ZS;BnaA08G0298900ZS;BnaC05G0063900ZS;BnaC03G0081400ZS	K08486+K08486+K08486+K08486+K08486+K08486+K08488	https:\\www.genome.jp\dbget-bin\www_bget?map04130
Ribosome biogenesis in eukaryotes	ko03008	55 out of 6277 0.876214752270193%	654 out of 32833 1.99189839490756%	1	1	BnaA01G0053800ZS;BnaA01G0424700ZS;BnaA04G0266600ZS;BnaA05G0027200ZS;BnaA05G0027300ZS;BnaA05G0453300ZS;BnaA07G0225700ZS;BnaC04G0583700ZS;BnaC05G0511400ZS;BnaC07G0256800ZS;BnaA04G0238300ZS;BnaC09G0434100ZS;BnaA04G0125500ZS;BnaC04G0413600ZS;BnaC06G0171900ZS;BnaA07G0228200ZS;BnaC06G0246100ZS;novel.5235;novel.6294;novel.7998;novel.8627;novel.8903;novel.10084;novel.3124;novel.3253;novel.3384;BnaA01G007…	K03097+K03097+K03097+K03097+K03097+K03097+K03097+K03097+K03097+K03115+K03538+K03539+K03539+K03539+K03539+K06943+K06943+K06943+K06943+K06943+K06943+K06943+K06943+K06943+K06943+K06943+K07936+K07936+K07936+K07936+K07936+K11128+K11131+K11131+K11883+K11883+K14521+K14521+K14525+K14525+K14539+K14539+K14544+K14544+K14544+K14548+K14548+K14570+K14570+K14570+K14570+K14570+K14572+K14573+K14573	https:\\www.genome.jp\dbget-bin\www_bget?map03008
Ubiquitin mediated proteolysis	ko04120	85 out of 6277 1.3541500716903%	883 out of 32833 2.68936740474523%	1	1	novel.7534;BnaA05G0392000ZS;BnaC09G0607700ZS;BnaA02G0272900ZS;BnaA03G0012800ZS;BnaA10G0288400ZS;BnaC03G0016900ZS;BnaC07G0350900ZS;BnaA01G0046100ZS;BnaA01G0149900ZS;BnaC01G0190600ZS;BnaC03G0367300ZS;BnaC04G0342100ZS;novel.4566;novel.5415;BnaA03G0055300ZS;BnaA03G0565500ZS;novel.7500;BnaC02G0140100ZS;BnaA07G0366200ZS;BnaC03G0643700ZS;BnaC03G0643800ZS;BnaC06G0430600ZS;BnaA07G0311500ZS;BnaC06G0362100Z…	K03094+K03350+K03354+K03354+K03354+K03354+K03354+K03358+K03363+K03363+K03363+K03363+K03363+K03363+K03363+K03364+K03364+K03364+K03873+K03875+K03875+K03875+K03875+K04506+K04506+K04706+K04706+K06688+K06688+K06688+K06689+K06689+K06689+K06689+K08770+K09561+K09561+K09561+K10140+K10143+K10144+K10144+K10260+K10260+K10260+K10260+K10260+K10260+K10260+K10260+K10260+K10260+K10260+K10260+K10260+K10260+K10260+…	https:\\www.genome.jp\dbget-bin\www_bget?map04120
Protein processing in endoplasmic reticulum	ko04141	132 out of 6277 2.10291540544846%	1211 out of 32833 3.68836231839917%	1	1	BnaA07G0101300ZS;BnaC07G0153200ZS;BnaC09G0185100ZS;BnaC09G0185300ZS;BnaC09G0185400ZS;BnaA09G0166000ZS;BnaA09G0166200ZS;BnaC01G0335400ZS;novel.7534;BnaC04G0573600ZS;BnaA03G0479600ZS;BnaA06G0148400ZS;BnaA07G0129900ZS;BnaA08G0176100ZS;BnaA09G0694100ZS;BnaC01G0457500ZS;BnaC05G0179900ZS;BnaC05G0431600ZS;BnaC07G0191800ZS;BnaC07G0377000ZS;novel.4681;novel.5134;novel.596;novel.6107;novel.704;novel.8859;n…	K01228+K01228+K01456+K01456+K01456+K01456+K01456+K01456+K03094+K03237+K03283+K03283+K03283+K03283+K03283+K03283+K03283+K03283+K03283+K03283+K03283+K03283+K03283+K03283+K03283+K03283+K03283+K03283+K03283+K04079+K04079+K04374+K04374+K04374+K04374+K04374+K05546+K06689+K06689+K06689+K06689+K07342+K07953+K07953+K08057+K08852+K09481+K09481+K09481+K09487+K09487+K09487+K09487+K09487+K09487+K09487+K09490+…	https:\\www.genome.jp\dbget-bin\www_bget?map04141
Proteasome	ko03050	9 out of 6277 0.143380595826032%	380 out of 32833 1.1573721560625%	1	1	BnaA07G0162800ZS;BnaC04G0484800ZS;BnaA03G0166400ZS;BnaA09G0477600ZS;BnaC05G0174900ZS;BnaC02G0544700ZS;BnaC09G0427900ZS;BnaC09G0187700ZS;BnaA09G0168200ZS	K02725+K02725+K03029+K03029+K03029+K03035+K03038+K06699+K06699	https:\\www.genome.jp\dbget-bin\www_bget?map03050
Endocytosis	ko04144	96 out of 6277 1.52939302214434%	1012 out of 32833 3.08226479456644%	1	1	BnaC08G0201200ZS;BnaC08G0201500ZS;BnaC08G0421800ZS;BnaA09G0571400ZS;BnaC01G0032200ZS;BnaC03G0452600ZS;BnaA03G0479600ZS;BnaA06G0148400ZS;BnaA07G0129900ZS;BnaA08G0176100ZS;BnaA09G0694100ZS;BnaC01G0457500ZS;BnaC05G0179900ZS;BnaC05G0431600ZS;BnaC07G0191800ZS;BnaC07G0377000ZS;novel.4681;novel.5134;novel.596;novel.6107;novel.704;novel.8859;novel.1101;novel.2475;novel.332;BnaA05G0108400ZS;BnaC04G0135600…	K00889+K00889+K00889+K00889+K01115+K01115+K03283+K03283+K03283+K03283+K03283+K03283+K03283+K03283+K03283+K03283+K03283+K03283+K03283+K03283+K03283+K03283+K03283+K03283+K03283+K05758+K05758+K07897+K07897+K07897+K07897+K07897+K07897+K07897+K07904+K07904+K07904+K07904+K07904+K07904+K07904+K07904+K07904+K07904+K07937+K07937+K07937+K11866+K12191+K12191+K12191+K12192+K12198+K12198+K12198+K12198+K12199+…	https:\\www.genome.jp\dbget-bin\www_bget?map04144
Nucleotide excision repair	ko03420	33 out of 6277 0.525728851362116%	657 out of 32833 2.00103554350806%	1	1	BnaC05G0064500ZS;BnaA01G0138000ZS;BnaA05G0175400ZS;BnaA09G0377100ZS;BnaC01G0176400ZS;BnaC05G0294800ZS;BnaC05G0385300ZS;BnaC06G0099800ZS;BnaA03G0268400ZS;BnaC03G0322000ZS;BnaC09G0172000ZS;BnaC03G0758500ZS;BnaC04G0333100ZS;BnaC04G0414500ZS;BnaC07G0172100ZS;BnaC07G0249100ZS;novel.5469;novel.5588;novel.6645;novel.11;novel.7287;novel.7330;novel.9119;novel.1624;BnaC02G0132800ZS;BnaA07G0372100ZS;BnaC06G…	K02327+K02335+K02335+K02335+K02335+K02335+K02335+K02335+K06634+K06634+K07466+K07466+K07466+K07466+K07466+K07466+K07466+K07466+K07466+K07466+K07466+K07466+K07466+K07466+K10140+K10570+K10570+K10610+K10755+K10755+K10755+K10844+K10844	https:\\www.genome.jp\dbget-bin\www_bget?map03420
Oxidative phosphorylation	ko00190	58 out of 6277 0.924008284212203%	844 out of 32833 2.57058447293881%	1	1	BnaA02G0411700ZS;BnaA02G0251700ZS;BnaA03G0036800ZS;BnaA09G0115900ZS;BnaA09G0692600ZS;BnaA09G0714000ZS;BnaC02G0338200ZS;BnaC03G0043400ZS;BnaC09G0407000ZS;BnaA02G0118400ZS;BnaA03G0516100ZS;BnaA03G0516200ZS;BnaA04G0149800ZS;BnaA06G0406600ZS;BnaA08G0156100ZS;BnaA09G0355800ZS;BnaA10G0132400ZS;BnaC03G0774500ZS;BnaC07G0494800ZS;novel.5613;novel.5785;novel.7742;novel.6795;BnaA01G0055700ZS;BnaC01G0065300Z…	K00235+K01507+K01507+K01507+K01507+K01507+K01507+K01507+K01535+K01535+K01535+K01535+K01535+K01535+K01535+K01535+K01535+K01535+K01535+K01535+K01535+K01535+K02108+K02109+K02109+K02113+K02113+K02113+K02113+K02113+K02113+K02115+K02115+K02115+K02115+K02115+K02115+K02132+K02133+K02133+K02140+K02146+K02147+K02150+K02150+K02154+K02154+K02258+K03884+K03884+K03884+K03884+K03946+K05573+K05573+K05577+K05579+…	https:\\www.genome.jp\dbget-bin\www_bget?map00190
Homologous recombination	ko03440	59 out of 6277 0.939939461526207%	723 out of 32833 2.20205281271891%	1	1	BnaC05G0064500ZS;BnaA01G0138000ZS;BnaA05G0175400ZS;BnaA09G0377100ZS;BnaC01G0176400ZS;BnaC05G0294800ZS;BnaC05G0385300ZS;BnaC06G0099800ZS;BnaA01G0421500ZS;BnaC01G0494200ZS;BnaC09G0172000ZS;BnaC03G0758500ZS;BnaC04G0333100ZS;BnaC04G0414500ZS;BnaC07G0172100ZS;BnaC07G0249100ZS;novel.5469;novel.5588;novel.6645;novel.11;novel.7287;novel.7330;novel.9119;novel.1624;BnaA05G0367700ZS;novel.902;BnaC08G0252500…	K02327+K02335+K02335+K02335+K02335+K02335+K02335+K02335+K03655+K03655+K07466+K07466+K07466+K07466+K07466+K07466+K07466+K07466+K07466+K07466+K07466+K07466+K07466+K07466+K10875+K10875+K12173+K12173+K12173+K12173+K12173+K12173+K12173+K12173+K12173+K12173+K12173+K12173+K12173+K12173+K12173+K12173+K12173+K12173+K12173+K12173+K12173+K12173+K12173+K12173+K12173+K12173+K12173+K12173+K12173+K12173+K12173+…	https:\\www.genome.jp\dbget-bin\www_bget?map03440
RNA transport	ko03013	69 out of 6277 1.09925123466624%	1113 out of 32833 3.38988213078305%	1	1	BnaA03G0385300ZS;BnaA10G0252800ZS;BnaC03G0476600ZS;BnaA03G0501500ZS;BnaA07G0234700ZS;BnaC03G0155000ZS;BnaC06G0254900ZS;BnaC04G0573600ZS;novel.4071;novel.5652;novel.9522;novel.10027;BnaA04G0247500ZS;BnaC04G0562700ZS;BnaC06G0081300ZS;BnaC06G0081400ZS;BnaC08G0460100ZS;BnaC06G0023700ZS;BnaA09G0050100ZS;BnaA09G0417000ZS;BnaC05G0252600ZS;BnaC08G0219200ZS;BnaA02G0201900ZS;BnaA08G0277700ZS;BnaC02G0268800…	K00784+K00784+K00784+K03231+K03231+K03231+K03231+K03237+K03238+K03238+K03238+K03238+K03239+K03239+K03239+K03239+K03243+K03246+K03247+K03251+K03251+K03257+K03257+K03257+K03257+K03257+K03538+K03539+K03539+K03539+K03539+K03680+K07936+K07936+K07936+K07936+K07936+K12882+K13126+K13126+K13126+K13126+K13137+K13175+K14004+K14289+K14292+K14292+K14292+K14292+K14292+K14292+K14292+K14292+K14292+K14292+K14292+…	https:\\www.genome.jp\dbget-bin\www_bget?map03013
mRNA surveillance pathway	ko03015	32 out of 6277 0.509797674048112%	678 out of 32833 2.06499558371151%	1	1	BnaC05G0534300ZS;BnaC02G0154100ZS;BnaC09G0105000ZS;BnaC08G0323500ZS;BnaA09G0485900ZS;BnaA09G0486100ZS;BnaC04G0347900ZS;BnaA09G0642900ZS;BnaC09G0244900ZS;BnaA03G0446400ZS;BnaC07G0421200ZS;BnaC08G0488300ZS;BnaA01G0301200ZS;BnaA05G0336300ZS;BnaA06G0098100ZS;BnaA09G0463600ZS;BnaA09G0630800ZS;BnaA09G0680700ZS;BnaA09G0702100ZS;BnaA09G0717500ZS;BnaC01G0024700ZS;BnaC01G0372100ZS;BnaC05G0120400ZS;BnaC05G0…	K06269+K11584+K12882+K13126+K13126+K13126+K13126+K14294+K14326+K14396+K14396+K14399+K14399+K14399+K14399+K14399+K14399+K14399+K14399+K14399+K14399+K14399+K14399+K14399+K14399+K14400+K14400+K14404+K14409+K14411+K14411+K14411	https:\\www.genome.jp\dbget-bin\www_bget?map03015
DNA replication	ko03030	32 out of 6277 0.509797674048112%	627 out of 32833 1.90966405750312%	1	1	novel.1000;novel.1642;novel.318;BnaC05G0064500ZS;BnaA01G0138000ZS;BnaA05G0175400ZS;BnaA09G0377100ZS;BnaC01G0176400ZS;BnaC05G0294800ZS;BnaC05G0385300ZS;BnaC06G0099800ZS;BnaC06G0288000ZS;BnaA02G0298800ZS;BnaC05G0295900ZS;BnaA07G0280600ZS;BnaC09G0172000ZS;BnaC03G0758500ZS;BnaC04G0333100ZS;BnaC04G0414500ZS;BnaC07G0172100ZS;BnaC07G0249100ZS;novel.5469;novel.5588;novel.6645;novel.11;novel.7287;novel.73…	K02209+K02209+K02209+K02327+K02335+K02335+K02335+K02335+K02335+K02335+K02335+K02540+K02541+K02542+K02685+K07466+K07466+K07466+K07466+K07466+K07466+K07466+K07466+K07466+K07466+K07466+K07466+K07466+K07466+K10755+K10755+K10755	https:\\www.genome.jp\dbget-bin\www_bget?map03030
Ribosome	ko03010	165 out of 6277 2.62864425681058%	1620 out of 32833 4.93406024426644%	1	1	BnaA04G0000500ZS;BnaC04G0254500ZS;BnaC09G0526000ZS;BnaA10G0221400ZS;BnaC02G0056300ZS;BnaA08G0072000ZS;BnaA09G0388300ZS;BnaC05G0288500ZS;BnaC09G0441900ZS;BnaA02G0232600ZS;BnaA07G0376800ZS;BnaC02G0313200ZS;BnaC06G0442400ZS;BnaC08G0172900ZS;BnaA03G0082500ZS;BnaA03G0374100ZS;BnaC03G0457800ZS;BnaC09G0268600ZS;BnaA06G0392300ZS;BnaA09G0228900ZS;BnaC07G0293300ZS;BnaC06G0390000ZS;BnaC08G0342500ZS;BnaA07G0…	K02863+K02863+K02864+K02864+K02864+K02867+K02867+K02867+K02870+K02871+K02871+K02871+K02871+K02875+K02875+K02875+K02875+K02876+K02876+K02876+K02876+K02878+K02879+K02879+K02879+K02879+K02880+K02881+K02881+K02881+K02881+K02881+K02881+K02881+K02882+K02882+K02884+K02884+K02884+K02884+K02884+K02884+K02885+K02885+K02885+K02885+K02885+K02885+K02886+K02888+K02888+K02894+K02894+K02895+K02895+K02895+K02899+…	https:\\www.genome.jp\dbget-bin\www_bget?map03010
Mismatch repair	ko03430	27 out of 6277 0.430141787478095%	562 out of 32833 1.71169250449243%	1	1	BnaC05G0064500ZS;BnaA02G0135400ZS;BnaA02G0154900ZS;BnaA06G0441900ZS;BnaC02G0170500ZS;BnaC02G0198100ZS;BnaC07G0219400ZS;BnaC09G0172000ZS;BnaC03G0758500ZS;BnaC04G0333100ZS;BnaC04G0414500ZS;BnaC07G0172100ZS;BnaC07G0249100ZS;novel.5469;novel.5588;novel.6645;novel.11;novel.7287;novel.7330;novel.9119;novel.1624;BnaA02G0359400ZS;BnaA03G0272700ZS;BnaA09G0012800ZS;BnaA01G0143700ZS;BnaA09G0204000ZS;BnaC01G…	K02327+K07456+K07456+K07456+K07456+K07456+K07456+K07466+K07466+K07466+K07466+K07466+K07466+K07466+K07466+K07466+K07466+K07466+K07466+K07466+K07466+K08737+K08737+K08737+K10755+K10755+K10755	https:\\www.genome.jp\dbget-bin\www_bget?map03430
Spliceosome	ko03040	96 out of 6277 1.52939302214434%	1228 out of 32833 3.74013949380197%	1	1	BnaA03G0479600ZS;BnaA06G0148400ZS;BnaA07G0129900ZS;BnaA08G0176100ZS;BnaA09G0694100ZS;BnaC01G0457500ZS;BnaC05G0179900ZS;BnaC05G0431600ZS;BnaC07G0191800ZS;BnaC07G0377000ZS;novel.4681;novel.5134;novel.596;novel.6107;novel.704;novel.8859;novel.1101;novel.2475;novel.332;BnaA02G0340900ZS;BnaA02G0341000ZS;BnaA04G0122200ZS;BnaA04G0122400ZS;BnaA06G0286300ZS;BnaA10G0081200ZS;BnaC04G0410200ZS;BnaC04G0410400…	K03283+K03283+K03283+K03283+K03283+K03283+K03283+K03283+K03283+K03283+K03283+K03283+K03283+K03283+K03283+K03283+K03283+K03283+K03283+K11094+K11094+K11094+K11094+K11094+K11094+K11094+K11094+K11094+K11096+K12741+K12811+K12811+K12818+K12818+K12818+K12818+K12818+K12823+K12823+K12823+K12825+K12833+K12833+K12835+K12835+K12835+K12835+K12835+K12835+K12835+K12835+K12835+K12835+K12835+K12835+K12835+K12835+…	https:\\www.genome.jp\dbget-bin\www_bget?map03040

## Sheet: Sheet2
#KEGG_pathway	ko_id	Cluster_frequency	Genome_frequency	P-value	Corrected_P-value	GeneID	KEGG Orthology	hyperlink
Nitrogen metabolism	ko00910	13 out of 249 5.22088353413655%	181 out of 32833 0.551274632229769%	1.50219e-09	1.51721e-07	BnaC09G0498800ZS;BnaC08G0220400ZS;BnaC08G0532700ZS;BnaC08G0532800ZS;BnaA06G0047500ZS;BnaA06G0047600ZS;BnaA08G0276500ZS;BnaA08G0300800ZS;BnaA09G0667800ZS;BnaC05G0059500ZS;BnaC05G0059600ZS;BnaC08G0033200ZS;BnaC08G0033300ZS	K01915+K02575+K02575+K02575+K02575+K02575+K02575+K02575+K02575+K02575+K02575+K02575+K02575	https:\\www.genome.jp\dbget-bin\www_bget?map00910
Fatty acid degradation	ko00071	9 out of 249 3.6144578313253%	277 out of 32833 0.843663387445558%	0.000286955	0.0289825	BnaA03G0540000ZS;BnaA05G0470300ZS;novel.4710;novel.533;novel.640;novel.6493;novel.6994;novel.9568;BnaA06G0318200ZS	K00128+K01897+K14085+K14085+K14085+K14085+K14085+K14085+K18857	https:\\www.genome.jp\dbget-bin\www_bget?map00071
Valine, leucine and isoleucine degradation	ko00280	10 out of 249 4.01606425702811%	340 out of 32833 1.03554350805592%	0.000295519	0.0298475	BnaA03G0540000ZS;Bnascaffold0027G0055300ZS;BnaA09G0700400ZS;BnaC01G0489400ZS;novel.4710;novel.533;novel.640;novel.6493;novel.6994;novel.9568	K00128+K01968+K01968+K09699+K14085+K14085+K14085+K14085+K14085+K14085	https:\\www.genome.jp\dbget-bin\www_bget?map00280
MAPK signaling pathway - plant	ko04016	28 out of 249 11.2449799196787%	1847 out of 32833 5.62543782170377%	0.000398831	0.0402819	BnaA01G0134900ZS;BnaA06G0325800ZS;BnaA07G0168300ZS;BnaC04G0187800ZS;BnaA07G0234200ZS;BnaC08G0442000ZS;BnaC09G0243000ZS;BnaA04G0149000ZS;BnaC03G0735700ZS;novel.8882;novel.1519;BnaC03G0232800ZS;BnaA03G0534500ZS;BnaA08G0143500ZS;BnaA10G0146400ZS;BnaC07G0511400ZS;BnaA01G0073400ZS;BnaA09G0670200ZS;BnaA10G0054600ZS;BnaC08G0030200ZS;BnaC08G0099800ZS;BnaC08G0099900ZS;BnaA07G0183500ZS;BnaC03G0314000ZS;Bna…	K00940+K13416+K13416+K13416+K13420+K13422+K13422+K13422+K13426+K13449+K13449+K14496+K14497+K14497+K14497+K14497+K16224+K16224+K16224+K16224+K16224+K16224+K20559+K20606+K20716+K20727+K20728+K20772	https:\\www.genome.jp\dbget-bin\www_bget?map04016
Histidine metabolism	ko00340	7 out of 249 2.81124497991968%	182 out of 32833 0.554320348429933%	0.000503094	0.0508125	BnaA03G0540000ZS;novel.4710;novel.533;novel.640;novel.6493;novel.6994;novel.9568	K00128+K14085+K14085+K14085+K14085+K14085+K14085	https:\\www.genome.jp\dbget-bin\www_bget?map00340
Tryptophan metabolism	ko00380	11 out of 249 4.41767068273092%	476 out of 32833 1.44976091127829%	0.00111124	0.112235	BnaA03G0540000ZS;novel.995;BnaA03G0148600ZS;BnaA06G0331000ZS;novel.4710;novel.533;novel.640;novel.6493;novel.6994;novel.9568;BnaC06G0372400ZS	K00128+K01237+K11868+K11868+K14085+K14085+K14085+K14085+K14085+K14085+K16903	https:\\www.genome.jp\dbget-bin\www_bget?map00380
Lysine degradation	ko00310	8 out of 249 3.21285140562249%	272 out of 32833 0.828434806444735%	0.00117945	0.119124	BnaA03G0540000ZS;novel.4710;novel.533;novel.640;novel.6493;novel.6994;novel.9568;Bnascaffold0163G0000100ZS	K00128+K14085+K14085+K14085+K14085+K14085+K14085+K24405	https:\\www.genome.jp\dbget-bin\www_bget?map00310
Phenylpropanoid biosynthesis	ko00940	18 out of 249 7.2289156626506%	1067 out of 32833 3.24977918557549%	0.00141036	0.142446	BnaC09G0464400ZS;BnaA01G0376700ZS;BnaA02G0147900ZS;BnaA03G0536800ZS;BnaC02G0189800ZS;BnaC03G0350800ZS;BnaC04G0582400ZS;BnaC07G0513600ZS;BnaC08G0037400ZS;novel.2728;BnaC09G0579300ZS;BnaA01G0408100ZS;BnaC09G0271500ZS;BnaA07G0385600ZS;BnaA02G0015500ZS;BnaC01G0134700ZS;BnaC01G0046500ZS;BnaC06G0055400ZS	K00430+K00430+K00430+K00430+K00430+K00430+K00430+K00430+K00430+K00430+K01188+K01188+K01904+K09753+K10775+K22395+K23260+K23260	https:\\www.genome.jp\dbget-bin\www_bget?map00940
beta-Alanine metabolism	ko00410	8 out of 249 3.21285140562249%	311 out of 32833 0.94721773825115%	0.00271784	0.274502	BnaA03G0540000ZS;BnaC02G0357300ZS;novel.4710;novel.533;novel.640;novel.6493;novel.6994;novel.9568	K00128+K00276+K14085+K14085+K14085+K14085+K14085+K14085	https:\\www.genome.jp\dbget-bin\www_bget?map00410
Selenocompound metabolism	ko00450	5 out of 249 2.00803212851406%	145 out of 32833 0.441628849023848%	0.00508118	0.513199	BnaA08G0089800ZS;BnaA09G0028600ZS;BnaC01G0484900ZS;BnaC08G0128300ZS;BnaA09G0525500ZS	K00384+K00384+K00384+K00384+K01760	https:\\www.genome.jp\dbget-bin\www_bget?map00450
Biosynthesis of secondary metabolites	ko01110	72 out of 249 28.9156626506024%	7179 out of 32833 21.8651966009807%	0.00533927	0.539266	BnaA03G0540000ZS;Bnascaffold1706G0000200ZS;BnaC02G0357300ZS;BnaC09G0464400ZS;BnaA01G0376700ZS;BnaA02G0147900ZS;BnaA03G0536800ZS;BnaC02G0189800ZS;BnaC03G0350800ZS;BnaC04G0582400ZS;BnaC07G0513600ZS;BnaC08G0037400ZS;novel.2728;BnaA02G0200800ZS;BnaC06G0315300ZS;novel.8240;BnaA04G0056500ZS;novel.5087;novel.5090;BnaA09G0578100ZS;BnaC07G0451900ZS;BnaA03G0502500ZS;BnaA01G0134900ZS;BnaA03G0590300ZS;BnaC01…	K00128+K00228+K00276+K00430+K00430+K00430+K00430+K00430+K00430+K00430+K00430+K00430+K00430+K00454+K00454+K00454+K00511+K00695+K00695+K00815+K00815+K00901+K00940+K00981+K01114+K01176+K01177+K01188+K01188+K01602+K01620+K01623+K01738+K01742+K01742+K01742+K01757+K01760+K01778+K01783+K01807+K01835+K01859+K01904+K04124+K04125+K04125+K04125+K05933+K08081+K09699+K09753+K09834+K10251+K10528+K10775+K12657+…	https:\\www.genome.jp\dbget-bin\www_bget?map01110
Isoquinoline alkaloid biosynthesis	ko00950	6 out of 249 2.40963855421687%	227 out of 32833 0.691377577437334%	0.00794758	0.802705	BnaC02G0357300ZS;BnaA09G0578100ZS;BnaC07G0451900ZS;BnaA07G0118200ZS;BnaC07G0174900ZS;BnaC07G0175300ZS	K00276+K00815+K00815+K01742+K01742+K01742	https:\\www.genome.jp\dbget-bin\www_bget?map00950
Tyrosine metabolism	ko00350	6 out of 249 2.40963855421687%	229 out of 32833 0.697469009837663%	0.00827895	0.836174	BnaC02G0357300ZS;BnaA09G0578100ZS;BnaC07G0451900ZS;BnaA04G0155600ZS;BnaC04G0237200ZS;BnaA06G0318200ZS	K00276+K00815+K00815+K01555+K01800+K18857	https:\\www.genome.jp\dbget-bin\www_bget?map00350
Arginine and proline metabolism	ko00330	8 out of 249 3.21285140562249%	415 out of 32833 1.26397222306825%	0.0144079	1	BnaA03G0540000ZS;BnaA04G0253600ZS;novel.4710;novel.533;novel.640;novel.6493;novel.6994;novel.9568	K00128+K12657+K14085+K14085+K14085+K14085+K14085+K14085	https:\\www.genome.jp\dbget-bin\www_bget?map00330
Linoleic acid metabolism	ko00591	3 out of 249 1.20481927710843%	70 out of 32833 0.213200134011513%	0.0162461	1	BnaA02G0200800ZS;BnaC06G0315300ZS;novel.8240	K00454+K00454+K00454	https:\\www.genome.jp\dbget-bin\www_bget?map00591
Diterpenoid biosynthesis	ko00904	4 out of 249 1.60642570281124%	128 out of 32833 0.389851673621052%	0.0165763	1	BnaA06G0105000ZS;BnaA03G0460000ZS;BnaA10G0011600ZS;BnaC02G0312300ZS	K04124+K04125+K04125+K04125	https:\\www.genome.jp\dbget-bin\www_bget?map00904
Ascorbate and aldarate metabolism	ko00053	8 out of 249 3.21285140562249%	436 out of 32833 1.32793226327171%	0.0187841	1	BnaA03G0540000ZS;BnaA06G0095300ZS;novel.4710;novel.533;novel.640;novel.6493;novel.6994;novel.9568	K00128+K00469+K14085+K14085+K14085+K14085+K14085+K14085	https:\\www.genome.jp\dbget-bin\www_bget?map00053
Glycine, serine and threonine metabolism	ko00260	8 out of 249 3.21285140562249%	450 out of 32833 1.37057229007401%	0.0221847	1	BnaC02G0357300ZS;novel.7568;novel.4710;novel.533;novel.640;novel.6493;novel.6994;novel.9568	K00276+K01620+K14085+K14085+K14085+K14085+K14085+K14085	https:\\www.genome.jp\dbget-bin\www_bget?map00260
Photosynthesis - antenna proteins	ko00196	3 out of 249 1.20481927710843%	81 out of 32833 0.246703012213322%	0.0238392	1	BnaA04G0221200ZS;BnaC03G0660800ZS;BnaC04G0532900ZS	K08912+K08912+K08912	https:\\www.genome.jp\dbget-bin\www_bget?map00196
Metabolic pathways	ko01100	120 out of 249 48.1927710843374%	13753 out of 32833 41.8877349008619%	0.0254703	1	BnaA03G0540000ZS;Bnascaffold1706G0000200ZS;BnaC02G0357300ZS;BnaC09G0464400ZS;BnaA01G0376700ZS;BnaA02G0147900ZS;BnaA03G0536800ZS;BnaC02G0189800ZS;BnaC03G0350800ZS;BnaC04G0582400ZS;BnaC07G0513600ZS;BnaC08G0037400ZS;novel.2728;BnaA02G0200800ZS;BnaC06G0315300ZS;novel.8240;BnaA06G0095300ZS;BnaA04G0056500ZS;novel.5087;novel.5090;BnaA01G0410200ZS;BnaC09G0011200ZS;BnaA07G0269100ZS;BnaA09G0026400ZS;BnaC01…	K00128+K00228+K00276+K00430+K00430+K00430+K00430+K00430+K00430+K00430+K00430+K00430+K00430+K00454+K00454+K00454+K00469+K00511+K00695+K00695+K00759+K00799+K00799+K00799+K00799+K00799+K00815+K00815+K00889+K00901+K00940+K00981+K01051+K01051+K01051+K01051+K01054+K01114+K01176+K01177+K01183+K01183+K01183+K01183+K01183+K01184+K01188+K01188+K01213+K01213+K01213+K01237+K01255+K01555+K01602+K01620+K01623+…	https:\\www.genome.jp\dbget-bin\www_bget?map01100
Glycerolipid metabolism	ko00561	9 out of 249 3.6144578313253%	588 out of 32833 1.79088112569671%	0.0363818	1	BnaA03G0540000ZS;BnaA03G0502500ZS;BnaC06G0398400ZS;novel.4710;novel.533;novel.640;novel.6493;novel.6994;novel.9568	K00128+K00901+K01054+K14085+K14085+K14085+K14085+K14085+K14085	https:\\www.genome.jp\dbget-bin\www_bget?map00561
Circadian rhythm - plant	ko04712	7 out of 249 2.81124497991968%	414 out of 32833 1.26092650686809%	0.0393891	1	BnaA05G0027300ZS;BnaC06G0458300ZS;BnaC05G0226300ZS;novel.7817;BnaA02G0400200ZS;BnaC06G0360900ZS;BnaC03G0263500ZS	K03097+K03097+K12135+K16221+K16222+K16222+K16240	https:\\www.genome.jp\dbget-bin\www_bget?map04712
alpha-Linolenic acid metabolism	ko00592	5 out of 249 2.00803212851406%	250 out of 32833 0.761429050041117%	0.0424608	1	BnaA02G0200800ZS;BnaC06G0315300ZS;novel.8240;BnaA03G0427200ZS;BnaA06G0318200ZS	K00454+K00454+K00454+K10528+K18857	https:\\www.genome.jp\dbget-bin\www_bget?map00592
Glycolysis / Gluconeogenesis	ko00010	10 out of 249 4.01606425702811%	732 out of 32833 2.22946425852039%	0.0537177	1	BnaA03G0540000ZS;novel.7276;BnaA09G0681800ZS;novel.4710;novel.533;novel.640;novel.6493;novel.6994;novel.9568;BnaA06G0318200ZS	K00128+K01623+K01835+K14085+K14085+K14085+K14085+K14085+K14085+K18857	https:\\www.genome.jp\dbget-bin\www_bget?map00010
Pyruvate metabolism	ko00620	8 out of 249 3.21285140562249%	574 out of 32833 1.74824109889441%	0.0724604	1	BnaA03G0540000ZS;novel.4710;novel.533;novel.640;novel.6493;novel.6994;novel.9568;BnaA06G0318200ZS	K00128+K14085+K14085+K14085+K14085+K14085+K14085+K18857	https:\\www.genome.jp\dbget-bin\www_bget?map00620
Vitamin B6 metabolism	ko00750	2 out of 249 0.803212851405622%	61 out of 32833 0.185788688210033%	0.078339	1	BnaA06G0121600ZS;BnaA09G0616400ZS	K13248+K13248	https:\\www.genome.jp\dbget-bin\www_bget?map00750
Tropane, piperidine and pyridine alkaloid biosynthesis	ko00960	4 out of 249 1.60642570281124%	215 out of 32833 0.654828983035361%	0.081699	1	BnaC02G0357300ZS;BnaA09G0578100ZS;BnaC07G0451900ZS;BnaC04G0186400ZS	K00276+K00815+K00815+K08081	https:\\www.genome.jp\dbget-bin\www_bget?map00960
Ubiquinone and other terpenoid-quinone biosynthesis	ko00130	4 out of 249 1.60642570281124%	224 out of 32833 0.682240428836841%	0.0915962	1	BnaA09G0578100ZS;BnaC07G0451900ZS;BnaC09G0271500ZS;novel.4570	K00815+K00815+K01904+K09834	https:\\www.genome.jp\dbget-bin\www_bget?map00130
Plant hormone signal transduction	ko04075	23 out of 249 9.23694779116466%	2271 out of 32833 6.91682149057351%	0.096521	1	BnaA06G0325800ZS;BnaA07G0168300ZS;BnaC04G0187800ZS;BnaC08G0442000ZS;BnaC09G0243000ZS;BnaA04G0149000ZS;novel.8882;novel.1519;BnaA09G0510200ZS;BnaA01G0401300ZS;novel.700;BnaC06G0416500ZS;BnaC03G0417400ZS;BnaC06G0411100ZS;BnaC06G0352000ZS;novel.1380;novel.8153;BnaC03G0232800ZS;BnaA03G0534500ZS;BnaA08G0143500ZS;BnaA10G0146400ZS;BnaC07G0511400ZS;BnaA04G0264300ZS	K13416+K13416+K13416+K13422+K13422+K13422+K13449+K13449+K13464+K14484+K14487+K14488+K14490+K14492+K14493+K14494+K14494+K14496+K14497+K14497+K14497+K14497+K14508	https:\\www.genome.jp\dbget-bin\www_bget?map04075
Phenylalanine metabolism	ko00360	4 out of 249 1.60642570281124%	233 out of 32833 0.709651874638321%	0.102037	1	BnaC02G0357300ZS;BnaA09G0578100ZS;BnaC07G0451900ZS;BnaA02G0015500ZS	K00276+K00815+K00815+K10775	https:\\www.genome.jp\dbget-bin\www_bget?map00360
Plant-pathogen interaction	ko04626	26 out of 249 10.4417670682731%	2759 out of 32833 8.40313099625377%	0.147345	1	BnaA07G0384200ZS;BnaA06G0325800ZS;BnaA07G0168300ZS;BnaC04G0187800ZS;BnaA07G0234200ZS;BnaC03G0735700ZS;BnaA09G0705100ZS;novel.3707;Bnascaffold0313G0000300ZS;BnaA01G0380900ZS;BnaC07G0474700ZS;novel.8882;novel.1519;BnaA07G0111500ZS;BnaA10G0087800ZS;BnaC02G0087000ZS;BnaA07G0020300ZS;BnaA01G0073400ZS;BnaA09G0670200ZS;BnaA10G0054600ZS;BnaC08G0030200ZS;BnaC08G0099800ZS;BnaC08G0099900ZS;BnaC01G0248700ZS;…	K05391+K13416+K13416+K13416+K13420+K13426+K13433+K13433+K13448+K13448+K13448+K13449+K13449+K13457+K13458+K13459+K15397+K16224+K16224+K16224+K16224+K16224+K16224+K16225+K16225+K18878	https:\\www.genome.jp\dbget-bin\www_bget?map04626
Glutathione metabolism	ko00480	6 out of 249 2.40963855421687%	479 out of 32833 1.45889805987878%	0.158263	1	BnaC09G0011200ZS;BnaA07G0269100ZS;BnaA09G0026400ZS;BnaC01G0505400ZS;BnaC04G0494100ZS;BnaA01G0398800ZS	K00799+K00799+K00799+K00799+K00799+K01255	https:\\www.genome.jp\dbget-bin\www_bget?map00480
Cysteine and methionine metabolism	ko00270	7 out of 249 2.81124497991968%	594 out of 32833 1.80915542289769%	0.167061	1	BnaA09G0578100ZS;BnaC07G0451900ZS;BnaC02G0496100ZS;BnaA09G0525500ZS;BnaA07G0010200ZS;BnaC08G0404700ZS;BnaA01G0408200ZS	K00815+K00815+K01738+K01760+K05933+K20772+K22846	https:\\www.genome.jp\dbget-bin\www_bget?map00270
Pentose and glucuronate interconversions	ko00040	10 out of 249 4.01606425702811%	979 out of 32833 2.98175615996101%	0.21162	1	BnaA01G0354000ZS;BnaA03G0337800ZS;BnaA06G0176800ZS;BnaC04G0097700ZS;BnaA08G0287500ZS;BnaA09G0691000ZS;BnaA09G0712500ZS;BnaA10G0012000ZS;BnaA09G0083100ZS;Bnascaffold0308G0000400ZS	K01051+K01051+K01051+K01051+K01184+K01213+K01213+K01213+K01728+K01783	https:\\www.genome.jp\dbget-bin\www_bget?map00040
Pentose phosphate pathway	ko00030	4 out of 249 1.60642570281124%	326 out of 32833 0.992903481253617%	0.235524	1	novel.7276;Bnascaffold0308G0000400ZS;BnaA01G0401000ZS;BnaA09G0681800ZS	K01623+K01783+K01807+K01835	https:\\www.genome.jp\dbget-bin\www_bget?map00030
Limonene and pinene degradation	ko00903	1 out of 249 0.401606425702811%	41 out of 32833 0.124874364206743%	0.268248	1	BnaA03G0540000ZS	K00128	https:\\www.genome.jp\dbget-bin\www_bget?map00903
Inositol phosphate metabolism	ko00562	5 out of 249 2.00803212851406%	458 out of 32833 1.39493801967533%	0.268449	1	BnaA06G0095300ZS;BnaC08G0201200ZS;BnaC01G0506700ZS;BnaC01G0485100ZS;BnaA01G0179200ZS	K00469+K00889+K01114+K10572+K19801	https:\\www.genome.jp\dbget-bin\www_bget?map00562
Phosphatidylinositol signaling system	ko04070	5 out of 249 2.00803212851406%	471 out of 32833 1.43453233027746%	0.287293	1	BnaC08G0201200ZS;BnaA03G0502500ZS;BnaA03G0590300ZS;BnaC01G0485100ZS;BnaA01G0179200ZS	K00889+K00901+K00981+K10572+K19801	https:\\www.genome.jp\dbget-bin\www_bget?map04070
Fatty acid elongation	ko00062	2 out of 249 0.803212851405622%	152 out of 32833 0.462948862424999%	0.320563	1	novel.3403;BnaA07G0020300ZS	K10251+K15397	https:\\www.genome.jp\dbget-bin\www_bget?map00062
Carbon fixation in photosynthetic organisms	ko00710	4 out of 249 1.60642570281124%	380 out of 32833 1.1573721560625%	0.326051	1	BnaC04G0380700ZS;novel.7276;Bnascaffold0308G0000400ZS;BnaA01G0401000ZS	K01602+K01623+K01783+K01807	https:\\www.genome.jp\dbget-bin\www_bget?map00710
Carotenoid biosynthesis	ko00906	2 out of 249 0.803212851405622%	170 out of 32833 0.51777175402796%	0.370015	1	BnaA01G0101700ZS;BnaC01G0124100ZS	K09843+K09843	https:\\www.genome.jp\dbget-bin\www_bget?map00906
Ribosome biogenesis in eukaryotes	ko03008	6 out of 249 2.40963855421687%	654 out of 32833 1.99189839490756%	0.376872	1	BnaA05G0027300ZS;BnaC06G0458300ZS;novel.372;BnaA01G0405800ZS;BnaA01G0410600ZS;BnaC08G0097800ZS	K03097+K03097+K06943+K11128+K14290+K14548	https:\\www.genome.jp\dbget-bin\www_bget?map03008
Cyanoamino acid metabolism	ko00460	3 out of 249 1.20481927710843%	331 out of 32833 1.00813206225444%	0.459964	1	BnaC09G0579300ZS;BnaA01G0408100ZS;BnaA03G0559900ZS	K01188+K01188+K20802	https:\\www.genome.jp\dbget-bin\www_bget?map00460
Thiamine metabolism	ko00730	1 out of 249 0.401606425702811%	81 out of 32833 0.246703012213322%	0.460648	1	BnaC04G0183400ZS	K03147	https:\\www.genome.jp\dbget-bin\www_bget?map00730
Homologous recombination	ko03440	6 out of 249 2.40963855421687%	723 out of 32833 2.20205281271891%	0.469411	1	BnaA01G0411800ZS;BnaC08G0252500ZS;BnaC08G0252700ZS;BnaA06G0134600ZS;BnaA08G0108800ZS;BnaC05G0162100ZS	K10739+K12173+K12173+K12173+K12173+K12173	https:\\www.genome.jp\dbget-bin\www_bget?map03440
Biosynthesis of unsaturated fatty acids	ko01040	1 out of 249 0.401606425702811%	84 out of 32833 0.255840160813815%	0.472857	1	novel.3403	K10251	https:\\www.genome.jp\dbget-bin\www_bget?map01040
Indole alkaloid biosynthesis	ko00901	1 out of 249 0.401606425702811%	88 out of 32833 0.268023025614473%	0.488707	1	BnaC02G0280100ZS	K01757	https:\\www.genome.jp\dbget-bin\www_bget?map00901
Lysine biosynthesis	ko00300	1 out of 249 0.401606425702811%	92 out of 32833 0.280205890415131%	0.504084	1	BnaA09G0497500ZS	K01778	https:\\www.genome.jp\dbget-bin\www_bget?map00300
Biosynthesis of amino acids	ko01230	10 out of 249 4.01606425702811%	1288 out of 32833 3.92288246581184%	0.515054	1	novel.7568;novel.7276;BnaC02G0496100ZS;BnaA09G0525500ZS;BnaA09G0497500ZS;Bnascaffold0308G0000400ZS;BnaA01G0401000ZS;BnaC09G0498800ZS;BnaA04G0253600ZS;BnaA01G0408200ZS	K01620+K01623+K01738+K01760+K01778+K01783+K01807+K01915+K12657+K22846	https:\\www.genome.jp\dbget-bin\www_bget?map01230
Flavonoid biosynthesis	ko00941	2 out of 249 0.803212851405622%	233 out of 32833 0.709651874638321%	0.528984	1	novel.2784;BnaC05G0435900ZS	K01859+K22845	https:\\www.genome.jp\dbget-bin\www_bget?map00941
Betalain biosynthesis	ko00965	1 out of 249 0.401606425702811%	104 out of 32833 0.316754484817105%	0.547503	1	BnaA09G0631700ZS	K15777	https:\\www.genome.jp\dbget-bin\www_bget?map00965
Phenylalanine, tyrosine and tryptophan biosynthesis	ko00400	2 out of 249 0.803212851405622%	250 out of 32833 0.761429050041117%	0.567043	1	BnaA09G0578100ZS;BnaC07G0451900ZS	K00815+K00815	https:\\www.genome.jp\dbget-bin\www_bget?map00400
Starch and sucrose metabolism	ko00500	10 out of 249 4.01606425702811%	1342 out of 32833 4.08735114062072%	0.56764	1	novel.5087;novel.5090;BnaA03G0002500ZS;novel.279;BnaC09G0579300ZS;BnaA01G0408100ZS;BnaA09G0681800ZS;BnaC09G0570800ZS;BnaA10G0256800ZS;BnaC03G0702700ZS	K00695+K00695+K01176+K01177+K01188+K01188+K01835+K19891+K19891+K19892	https:\\www.genome.jp\dbget-bin\www_bget?map00500
Butanoate metabolism	ko00650	1 out of 249 0.401606425702811%	117 out of 32833 0.356348795419243%	0.590277	1	BnaC03G0493100ZS	K16871	https:\\www.genome.jp\dbget-bin\www_bget?map00650
Amino sugar and nucleotide sugar metabolism	ko00520	7 out of 249 2.81124497991968%	970 out of 32833 2.95434471415953%	0.605509	1	BnaA01G0105700ZS;BnaA05G0039400ZS;BnaC03G0250400ZS;BnaC04G0043100ZS;BnaC04G0595000ZS;BnaA09G0681800ZS;BnaA09G0497000ZS	K01183+K01183+K01183+K01183+K01183+K01835+K08678	https:\\www.genome.jp\dbget-bin\www_bget?map00520
Purine metabolism	ko00230	4 out of 249 1.60642570281124%	557 out of 32833 1.69646392349161%	0.61184	1	BnaA01G0410200ZS;BnaA01G0134900ZS;BnaA09G0681800ZS;BnaA01G0404500ZS	K00759+K00940+K01835+K14641	https:\\www.genome.jp\dbget-bin\www_bget?map00230
Sesquiterpenoid and triterpenoid biosynthesis	ko00909	1 out of 249 0.401606425702811%	125 out of 32833 0.380714525020559%	0.614572	1	BnaA04G0056500ZS	K00511	https:\\www.genome.jp\dbget-bin\www_bget?map00909
Galactose metabolism	ko00052	4 out of 249 1.60642570281124%	562 out of 32833 1.71169250449243%	0.618847	1	BnaA09G0681800ZS;BnaC01G0300700ZS;BnaA09G0167700ZS;BnaA09G0178900ZS	K01835+K12309+K18819+K18819	https:\\www.genome.jp\dbget-bin\www_bget?map00052
Folate biosynthesis	ko00790	1 out of 249 0.401606425702811%	129 out of 32833 0.392897389821216%	0.626176	1	BnaC09G0227800ZS	K15631	https:\\www.genome.jp\dbget-bin\www_bget?map00790
Cutin, suberine and wax biosynthesis	ko00073	2 out of 249 0.803212851405622%	288 out of 32833 0.877166265647367%	0.643935	1	novel.7290;novel.1837	K20769+K20769	https:\\www.genome.jp\dbget-bin\www_bget?map00073
Alanine, aspartate and glutamate metabolism	ko00250	2 out of 249 0.803212851405622%	291 out of 32833 0.88630341424786%	0.649524	1	BnaC09G0498800ZS;BnaC03G0493100ZS	K01915+K16871	https:\\www.genome.jp\dbget-bin\www_bget?map00250
Other glycan degradation	ko00511	2 out of 249 0.803212851405622%	295 out of 32833 0.898486279048518%	0.656867	1	BnaA02G0169200ZS;BnaC01G0300700ZS	K01206+K12309	https:\\www.genome.jp\dbget-bin\www_bget?map00511
Ether lipid metabolism	ko00565	1 out of 249 0.401606425702811%	144 out of 32833 0.438583132823683%	0.666675	1	BnaC01G0506700ZS	K01114	https:\\www.genome.jp\dbget-bin\www_bget?map00565
Arachidonic acid metabolism	ko00590	1 out of 249 0.401606425702811%	145 out of 32833 0.441628849023848%	0.669214	1	BnaA01G0406700ZS	K15730	https:\\www.genome.jp\dbget-bin\www_bget?map00590
Glycosylphosphatidylinositol (GPI)-anchor biosynthesis	ko00563	1 out of 249 0.401606425702811%	146 out of 32833 0.444674565224012%	0.671734	1	BnaA01G0412300ZS	K03860	https:\\www.genome.jp\dbget-bin\www_bget?map00563
Fatty acid metabolism	ko01212	2 out of 249 0.803212851405622%	312 out of 32833 0.950263454451314%	0.686715	1	BnaA05G0470300ZS;novel.3403	K01897+K10251	https:\\www.genome.jp\dbget-bin\www_bget?map01212
Glycosphingolipid biosynthesis - ganglio series	ko00604	1 out of 249 0.401606425702811%	153 out of 32833 0.465994578625164%	0.688845	1	BnaC01G0300700ZS	K12309	https:\\www.genome.jp\dbget-bin\www_bget?map00604
Zeatin biosynthesis	ko00908	1 out of 249 0.401606425702811%	154 out of 32833 0.469040294825328%	0.691216	1	BnaA09G0493600ZS	K13496	https:\\www.genome.jp\dbget-bin\www_bget?map00908
Steroid biosynthesis	ko00100	1 out of 249 0.401606425702811%	166 out of 32833 0.505588889227302%	0.7183	1	BnaA04G0056500ZS	K00511	https:\\www.genome.jp\dbget-bin\www_bget?map00100
Propanoate metabolism	ko00640	1 out of 249 0.401606425702811%	172 out of 32833 0.523863186428289%	0.730941	1	BnaC01G0489400ZS	K09699	https:\\www.genome.jp\dbget-bin\www_bget?map00640
Glycosaminoglycan degradation	ko00531	1 out of 249 0.401606425702811%	172 out of 32833 0.523863186428289%	0.730941	1	BnaC01G0300700ZS	K12309	https:\\www.genome.jp\dbget-bin\www_bget?map00531
Arginine biosynthesis	ko00220	1 out of 249 0.401606425702811%	176 out of 32833 0.536046051228946%	0.739053	1	BnaC09G0498800ZS	K01915	https:\\www.genome.jp\dbget-bin\www_bget?map00220
Sulfur metabolism	ko00920	1 out of 249 0.401606425702811%	182 out of 32833 0.554320348429933%	0.750767	1	BnaC02G0496100ZS	K01738	https:\\www.genome.jp\dbget-bin\www_bget?map00920
ABC transporters	ko02010	2 out of 249 0.803212851405622%	356 out of 32833 1.08427496725855%	0.75416	1	BnaA01G0148700ZS;BnaA01G0364200ZS	K05658+K05665	https:\\www.genome.jp\dbget-bin\www_bget?map02010
Pyrimidine metabolism	ko00240	2 out of 249 0.803212851405622%	361 out of 32833 1.09950354825937%	0.760978	1	BnaA01G0134900ZS;BnaA01G0404500ZS	K00940+K14641	https:\\www.genome.jp\dbget-bin\www_bget?map00240
Autophagy - other	ko04136	1 out of 249 0.401606425702811%	212 out of 32833 0.645691834434867%	0.801929	1	BnaA04G0285300ZS	K08341	https:\\www.genome.jp\dbget-bin\www_bget?map04136
Fatty acid biosynthesis	ko00061	1 out of 249 0.401606425702811%	213 out of 32833 0.648737550635032%	0.803441	1	BnaA05G0470300ZS	K01897	https:\\www.genome.jp\dbget-bin\www_bget?map00061
Porphyrin and chlorophyll metabolism	ko00860	1 out of 249 0.401606425702811%	217 out of 32833 0.66092041543569%	0.809374	1	Bnascaffold1706G0000200ZS	K00228	https:\\www.genome.jp\dbget-bin\www_bget?map00860
Pantothenate and CoA biosynthesis	ko00770	1 out of 249 0.401606425702811%	221 out of 32833 0.673103280236348%	0.815129	1	BnaA03G0540000ZS	K00128	https:\\www.genome.jp\dbget-bin\www_bget?map00770
Glycerophospholipid metabolism	ko00564	3 out of 249 1.20481927710843%	622 out of 32833 1.8944354765023%	0.853007	1	BnaA03G0502500ZS;BnaA03G0590300ZS;BnaC01G0506700ZS	K00901+K00981+K01114	https:\\www.genome.jp\dbget-bin\www_bget?map00564
Glyoxylate and dicarboxylate metabolism	ko00630	2 out of 249 0.803212851405622%	449 out of 32833 1.36752657387385%	0.856633	1	BnaC04G0380700ZS;BnaC09G0498800ZS	K01602+K01915	https:\\www.genome.jp\dbget-bin\www_bget?map00630
Biosynthesis of cofactors	ko01240	7 out of 249 2.81124497991968%	1308 out of 32833 3.98379678981513%	0.870812	1	BnaA03G0540000ZS;Bnascaffold1706G0000200ZS;BnaA01G0134900ZS;BnaC04G0183400ZS;novel.4570;BnaA06G0121600ZS;BnaA09G0616400ZS	K00128+K00228+K00940+K03147+K09834+K13248+K13248	https:\\www.genome.jp\dbget-bin\www_bget?map01240
Protein processing in endoplasmic reticulum	ko04141	6 out of 249 2.40963855421687%	1211 out of 32833 3.68836231839917%	0.900256	1	BnaA03G0572200ZS;novel.596;BnaA01G0392800ZS;BnaC04G0115600ZS;BnaC05G0046300ZS;BnaC04G0347600ZS	K03283+K03283+K10661+K13525+K13993+K14003	https:\\www.genome.jp\dbget-bin\www_bget?map04141
RNA polymerase	ko03020	1 out of 249 0.401606425702811%	306 out of 32833 0.931989157250327%	0.903713	1	novel.3062	K03018	https:\\www.genome.jp\dbget-bin\www_bget?map03020
Spliceosome	ko03040	6 out of 249 2.40963855421687%	1228 out of 32833 3.74013949380197%	0.90716	1	BnaA03G0572200ZS;novel.596;BnaC07G0412600ZS;BnaC08G0157100ZS;BnaA06G0054800ZS;BnaC09G0575600ZS	K03283+K03283+K12825+K12835+K12890+K12900	https:\\www.genome.jp\dbget-bin\www_bget?map03040
Sphingolipid metabolism	ko00600	1 out of 249 0.401606425702811%	311 out of 32833 0.94721773825115%	0.907343	1	BnaC01G0300700ZS	K12309	https:\\www.genome.jp\dbget-bin\www_bget?map00600
Protein export	ko03060	1 out of 249 0.401606425702811%	323 out of 32833 0.983766332653123%	0.915508	1	BnaA06G0273000ZS	K03107	https:\\www.genome.jp\dbget-bin\www_bget?map03060
RNA transport	ko03013	5 out of 249 2.00803212851406%	1113 out of 32833 3.38988213078305%	0.927176	1	BnaA01G0374100ZS;BnaA01G0400800ZS;BnaA01G0410600ZS;BnaC01G0507400ZS;BnaC07G0150800ZS	K03248+K14289+K14290+K14292+K14308	https:\\www.genome.jp\dbget-bin\www_bget?map03013
Proteasome	ko03050	1 out of 249 0.401606425702811%	380 out of 32833 1.1573721560625%	0.94551	1	novel.627	K03065	https:\\www.genome.jp\dbget-bin\www_bget?map03050
Fructose and mannose metabolism	ko00051	1 out of 249 0.401606425702811%	387 out of 32833 1.17869216946365%	0.94837	1	novel.7276	K01623	https:\\www.genome.jp\dbget-bin\www_bget?map00051
Endocytosis	ko04144	4 out of 249 1.60642570281124%	1012 out of 32833 3.08226479456644%	0.95043	1	BnaC08G0201200ZS;BnaA03G0572200ZS;novel.596;BnaC08G0412200ZS	K00889+K03283+K03283+K07937	https:\\www.genome.jp\dbget-bin\www_bget?map04144
DNA replication	ko03030	2 out of 249 0.803212851405622%	627 out of 32833 1.90966405750312%	0.952499	1	novel.1642;BnaA01G0411800ZS	K02209+K10739	https:\\www.genome.jp\dbget-bin\www_bget?map03030
Nucleotide excision repair	ko03420	2 out of 249 0.803212851405622%	657 out of 32833 2.00103554350806%	0.960845	1	BnaA07G0372100ZS;BnaA01G0411800ZS	K10570+K10739	https:\\www.genome.jp\dbget-bin\www_bget?map03420
Peroxisome	ko04146	1 out of 249 0.401606425702811%	435 out of 32833 1.32488654707154%	0.964339	1	BnaA05G0470300ZS	K01897	https:\\www.genome.jp\dbget-bin\www_bget?map04146
Ribosome	ko03010	7 out of 249 2.81124497991968%	1620 out of 32833 4.93406024426644%	0.964858	1	BnaA06G0277900ZS;Bnascaffold0109G0000200ZS;BnaA01G0389200ZS;BnaA02G0348500ZS;BnaA01G0404100ZS;BnaC06G0362900ZS;BnaA01G0400600ZS	K02890+K02894+K02905+K02943+K02960+K02973+K02974	https:\\www.genome.jp\dbget-bin\www_bget?map03010
Carbon metabolism	ko01200	5 out of 249 2.00803212851406%	1326 out of 32833 4.03861968141809%	0.974406	1	BnaC04G0380700ZS;novel.7276;BnaC02G0496100ZS;Bnascaffold0308G0000400ZS;BnaA01G0401000ZS	K01602+K01623+K01738+K01783+K01807	https:\\www.genome.jp\dbget-bin\www_bget?map01200
Aminoacyl-tRNA biosynthesis	ko00970	1 out of 249 0.401606425702811%	489 out of 32833 1.48935522188043%	0.976498	1	BnaC01G0513900ZS	K01867	https:\\www.genome.jp\dbget-bin\www_bget?map00970
RNA degradation	ko03018	2 out of 249 0.803212851405622%	762 out of 32833 2.32083574452533%	0.980336	1	novel.6403;BnaA03G0538400ZS	K12617+K18681	https:\\www.genome.jp\dbget-bin\www_bget?map03018
Mismatch repair	ko03430	1 out of 249 0.401606425702811%	562 out of 32833 1.71169250449243%	0.98664	1	BnaA01G0411800ZS	K10739	https:\\www.genome.jp\dbget-bin\www_bget?map03430
Oxidative phosphorylation	ko00190	1 out of 249 0.401606425702811%	844 out of 32833 2.57058447293881%	0.998511	1	BnaA01G0410700ZS	K11352	https:\\www.genome.jp\dbget-bin\www_bget?map00190
Ubiquitin mediated proteolysis	ko04120	1 out of 249 0.401606425702811%	883 out of 32833 2.68936740474523%	0.998902	1	BnaA07G0372100ZS	K10570	https:\\www.genome.jp\dbget-bin\www_bget?map04120

## Sheet: Sheet3
#KEGG_pathway	ko_id	Cluster_frequency	Genome_frequency	P-value	Corrected_P-value	GeneID	KEGG Orthology	hyperlink
Carbon metabolism	ko01200	344 out of 5970 5.76214405360134%	1326 out of 32833 4.03861968141809%	0	0	BnaC09G0561100ZS;BnaA02G0032600ZS;BnaA10G0248000ZS;BnaC02G0036000ZS;novel.9515;BnaC09G0024300ZS;BnaA08G0077100ZS;BnaC08G0109100ZS;BnaC09G0416100ZS;BnaA02G0111100ZS;BnaA03G0107100ZS;BnaA10G0138800ZS;BnaC02G0136200ZS;BnaC03G0123700ZS;BnaA01G0039900ZS;BnaA03G0358500ZS;BnaA03G0543100ZS;BnaA08G0136800ZS;BnaA08G0260300ZS;BnaC01G0045700ZS;BnaC03G0436800ZS;BnaC03G0747700ZS;BnaC07G0519100ZS;BnaA01G0121600…	K00026+K00026+K00026+K00026+K00026+K00036+K00036+K00036+K00051+K00051+K00051+K00051+K00051+K00051+K00058+K00058+K00058+K00058+K00058+K00058+K00058+K00058+K00058+K00121+K00121+K00121+K00121+K00131+K00131+K00131+K00131+K00134+K00134+K00134+K00134+K00134+K00232+K00235+K00261+K00261+K00261+K00261+K00261+K00261+K00261+K00281+K00281+K00382+K00382+K00382+K00600+K00600+K00600+K00600+K00600+K00600+K00600+…	https:\\www.genome.jp\dbget-bin\www_bget?map01200
Carotenoid biosynthesis	ko00906	74 out of 5970 1.23953098827471%	170 out of 32833 0.51777175402796%	0	0	BnaA05G0480100ZS;BnaC09G0492400ZS;BnaA02G0068500ZS;BnaA03G0073200ZS;BnaA10G0196500ZS;BnaC02G0078700ZS;BnaC03G0083000ZS;BnaA04G0055700ZS;BnaA08G0202200ZS;BnaC03G0667600ZS;BnaC04G0354500ZS;BnaC05G0498900ZS;BnaC05G0562400ZS;novel.2366;BnaC09G0402100ZS;BnaA03G0113600ZS;BnaA10G0128800ZS;BnaC03G0131000ZS;BnaC09G0200400ZS;Bnascaffold0026G0072300ZS;BnaA09G0177600ZS;BnaA09G0675000ZS;BnaA07G0182700ZS;BnaC0…	K00514+K02291+K02291+K02291+K02291+K02291+K02291+K02293+K02293+K02293+K02293+K06443+K06443+K06443+K06444+K06444+K06444+K06444+K09835+K09835+K09835+K09835+K09837+K09837+K09838+K09838+K09838+K09838+K09838+K09838+K09838+K09838+K09839+K09839+K09839+K09839+K09840+K09840+K09840+K09840+K09840+K09840+K09841+K09841+K09841+K09841+K09843+K09843+K09843+K09843+K09843+K09843+K14595+K14595+K14595+K14595+K14595+…	https:\\www.genome.jp\dbget-bin\www_bget?map00906
Phenylpropanoid biosynthesis	ko00940	364 out of 5970 6.09715242881072%	1067 out of 32833 3.24977918557549%	0	0	BnaA01G0011000ZS;BnaA01G0039500ZS;BnaA05G0365200ZS;BnaA06G0447700ZS;BnaA08G0194900ZS;BnaA09G0596400ZS;BnaC01G0012900ZS;BnaC01G0045200ZS;BnaC03G0683600ZS;BnaC03G0684000ZS;BnaC07G0519500ZS;BnaC07G0545000ZS;BnaC09G0091800ZS;BnaC09G0100900ZS;BnaC09G0106000ZS;BnaC09G0294900ZS;BnaC09G0312500ZS;BnaC09G0464400ZS;BnaC09G0511700ZS;BnaC09G0581200ZS;BnaC09G0581300ZS;BnaA01G0045400ZS;BnaA01G0071800ZS;BnaA01G0…	K00083+K00083+K00083+K00083+K00083+K00083+K00083+K00083+K00083+K00083+K00083+K00083+K00430+K00430+K00430+K00430+K00430+K00430+K00430+K00430+K00430+K00430+K00430+K00430+K00430+K00430+K00430+K00430+K00430+K00430+K00430+K00430+K00430+K00430+K00430+K00430+K00430+K00430+K00430+K00430+K00430+K00430+K00430+K00430+K00430+K00430+K00430+K00430+K00430+K00430+K00430+K00430+K00430+K00430+K00430+K00430+K00430+…	https:\\www.genome.jp\dbget-bin\www_bget?map00940
MAPK signaling pathway - plant	ko04016	447 out of 5970 7.48743718592965%	1847 out of 32833 5.62543782170377%	0	0	BnaA06G0285000ZS;BnaA09G0083500ZS;BnaC03G0544700ZS;BnaA03G0050100ZS;BnaA06G0256000ZS;BnaA07G0171200ZS;BnaC03G0058000ZS;BnaC07G0317400ZS;BnaC08G0260800ZS;Bnascaffold0025G0038400ZS;BnaA01G0032600ZS;BnaA02G0147200ZS;BnaA03G0547900ZS;BnaA06G0144600ZS;BnaA07G0132000ZS;BnaA08G0131200ZS;BnaA08G0247000ZS;BnaC01G0037600ZS;BnaC02G0188700ZS;BnaC03G0740800ZS;BnaC07G0524400ZS;BnaC09G0039500ZS;BnaC09G0418000ZS…	K00940+K00940+K00940+K02183+K02183+K02183+K02183+K02183+K03781+K03781+K03781+K03781+K03781+K03781+K03781+K03781+K03781+K03781+K03781+K03781+K03781+K13413+K13413+K13413+K13413+K13413+K13413+K13413+K13413+K13413+K13413+K13413+K13413+K13413+K13413+K13413+K13413+K13413+K13413+K13413+K13413+K13413+K13413+K13413+K13413+K13413+K13413+K13413+K13413+K13413+K13413+K13413+K13413+K13413+K13413+K13413+K13413+…	https:\\www.genome.jp\dbget-bin\www_bget?map04016
Metabolic pathways	ko01100	3089 out of 5970 51.7420435510888%	13753 out of 32833 41.8877349008619%	9.48711e-65	1.31871e-62	BnaC08G0450700ZS;BnaA02G0383900ZS;BnaA09G0597200ZS;BnaC03G0003500ZS;BnaC09G0341100ZS;BnaA10G0089600ZS;BnaC08G0019700ZS;BnaC08G0019800ZS;BnaA07G0285200ZS;BnaC06G0327000ZS;BnaA10G0249100ZS;BnaC03G0533400ZS;BnaA02G0221800ZS;BnaC09G0561100ZS;BnaA02G0032600ZS;BnaA10G0248000ZS;BnaC02G0036000ZS;novel.9515;BnaC09G0024300ZS;BnaA08G0077100ZS;BnaC08G0109100ZS;BnaC09G0416100ZS;BnaA02G0111100ZS;BnaA03G0107100…	K00001+K00001+K00001+K00002+K00008+K00008+K00008+K00008+K00010+K00010+K00020+K00020+K00021+K00026+K00026+K00026+K00026+K00026+K00036+K00036+K00036+K00051+K00051+K00051+K00051+K00051+K00051+K00052+K00053+K00053+K00053+K00058+K00058+K00058+K00058+K00058+K00058+K00058+K00058+K00058+K00059+K00059+K00059+K00078+K00078+K00079+K00083+K00083+K00083+K00083+K00083+K00083+K00083+K00083+K00083+K00083+K00083+…	https:\\www.genome.jp\dbget-bin\www_bget?map01100
Photosynthesis	ko00195	178 out of 5970 2.98157453936348%	312 out of 32833 0.950263454451314%	1.54229e-53	2.14378e-51	BnaA01G0055700ZS;BnaC01G0065300ZS;BnaC09G0310000ZS;BnaA02G0251000ZS;BnaA03G0251900ZS;BnaA09G0261600ZS;BnaC02G0336600ZS;BnaC03G0299300ZS;BnaC09G0277400ZS;BnaA02G0258900ZS;BnaA03G0263200ZS;BnaA09G0236300ZS;BnaC02G0351500ZS;BnaC03G0314400ZS;BnaA01G0064000ZS;BnaC01G0077000ZS;BnaC09G0016600ZS;BnaA03G0266700ZS;BnaA09G0032200ZS;BnaC03G0319100ZS;BnaC08G0259500ZS;BnaA06G0143300ZS;BnaA07G0132900ZS;BnaA07G0…	K02109+K02109+K02113+K02113+K02113+K02113+K02113+K02113+K02115+K02115+K02115+K02115+K02115+K02115+K02634+K02634+K02636+K02636+K02636+K02636+K02638+K02638+K02638+K02638+K02638+K02638+K02638+K02638+K02638+K02639+K02639+K02639+K02639+K02639+K02639+K02639+K02639+K02639+K02639+K02639+K02639+K02639+K02639+K02639+K02640+K02641+K02641+K02641+K02641+K02641+K02641+K02641+K02641+K02641+K02641+K02692+K02692+…	https:\\www.genome.jp\dbget-bin\www_bget?map00195
Photosynthesis - antenna proteins	ko00196	68 out of 5970 1.13902847571189%	81 out of 32833 0.246703012213322%	9.82119e-38	1.36515e-35	BnaC08G0349200ZS;BnaA07G0190300ZS;BnaA09G0507700ZS;BnaC06G0191500ZS;BnaC08G0251300ZS;BnaA04G0010100ZS;BnaA07G0215800ZS;BnaA08G0253100ZS;BnaC04G0266800ZS;BnaC06G0230200ZS;BnaC09G0177400ZS;BnaA01G0279800ZS;BnaA03G0582000ZS;BnaA09G0160400ZS;BnaC01G0342600ZS;BnaC04G0235100ZS;BnaA06G0175800ZS;BnaC03G0618700ZS;BnaA08G0048100ZS;BnaC08G0062900ZS;BnaA03G0165600ZS;BnaA04G0221200ZS;BnaA05G0100700ZS;BnaA05G0…	K08907+K08907+K08907+K08907+K08908+K08908+K08908+K08908+K08908+K08908+K08909+K08909+K08909+K08909+K08909+K08909+K08910+K08910+K08911+K08911+K08912+K08912+K08912+K08912+K08912+K08912+K08912+K08912+K08912+K08912+K08912+K08912+K08912+K08912+K08912+K08912+K08913+K08913+K08913+K08913+K08913+K08913+K08913+K08913+K08914+K08914+K08914+K08915+K08915+K08915+K08915+K08915+K08915+K08916+K08916+K08916+K08916+…	https:\\www.genome.jp\dbget-bin\www_bget?map00196
Porphyrin and chlorophyll metabolism	ko00860	118 out of 5970 1.97654941373534%	217 out of 32833 0.66092041543569%	3.32671e-33	4.62413e-31	BnaA01G0167300ZS;BnaA03G0497900ZS;BnaA08G0167400ZS;BnaA08G0318400ZS;BnaA10G0020200ZS;BnaC01G0215200ZS;BnaC05G0022000ZS;BnaC07G0476300ZS;BnaC08G0006500ZS;BnaA09G0709600ZS;BnaA10G0018800ZS;BnaC05G0021000ZS;BnaA05G0441000ZS;BnaA10G0010800ZS;BnaC05G0012700ZS;BnaC05G0502900ZS;BnaA04G0258300ZS;BnaC04G0575600ZS;novel.7814;BnaA07G0314700ZS;BnaC06G0363000ZS;BnaC08G0421200ZS;BnaA09G0570800ZS;BnaC09G0568300…	K00218+K00218+K00218+K00218+K00218+K00218+K00218+K00218+K00218+K00228+K00228+K00228+K00231+K00231+K00231+K00231+K01599+K01599+K01599+K01698+K01698+K01719+K01719+K01749+K01749+K01749+K01749+K01749+K01749+K01772+K01772+K01845+K01845+K01845+K01845+K01885+K01885+K02492+K02492+K02492+K02492+K02492+K03403+K03403+K03404+K03404+K03405+K03405+K03405+K03405+K03405+K03405+K03428+K03428+K03428+K03428+K03794+…	https:\\www.genome.jp\dbget-bin\www_bget?map00860
Nitrogen metabolism	ko00910	74 out of 5970 1.23953098827471%	181 out of 32833 0.551274632229769%	2.28706e-13	3.17901e-11	BnaC09G0483800ZS;BnaC09G0483900ZS;BnaA01G0405900ZS;BnaA03G0027700ZS;BnaA10G0190000ZS;BnaC01G0508900ZS;BnaC02G0027900ZS;BnaA03G0129800ZS;BnaC03G0150600ZS;BnaC09G0604900ZS;BnaA03G0201500ZS;BnaA10G0286200ZS;BnaC03G0238000ZS;BnaC04G0580500ZS;BnaC09G0108500ZS;BnaA03G0141900ZS;BnaA09G0107500ZS;BnaC03G0164800ZS;BnaA01G0013400ZS;BnaA01G0013500ZS;BnaC01G0015800ZS;BnaC01G0015900ZS;BnaA02G0068000ZS;BnaA04G0…	K00261+K00261+K00261+K00261+K00261+K00261+K00261+K00264+K00264+K00284+K00284+K00284+K00284+K00284+K00366+K00366+K00366+K00366+K01455+K01455+K01455+K01455+K01501+K01501+K01501+K01673+K01673+K01673+K01673+K01673+K01673+K01673+K01673+K01673+K01673+K01673+K01673+K01673+K01673+K01673+K01674+K01674+K01674+K01915+K01915+K01915+K01915+K01915+K01915+K01915+K01915+K01915+K01915+K01915+K01915+K01915+K01915+…	https:\\www.genome.jp\dbget-bin\www_bget?map00910
Carbon fixation in photosynthetic organisms	ko00710	151 out of 5970 2.52931323283082%	380 out of 32833 1.1573721560625%	2.93732e-12	4.08287e-10	BnaC09G0561100ZS;BnaA02G0032600ZS;BnaA10G0248000ZS;BnaC02G0036000ZS;novel.9515;BnaC09G0416100ZS;BnaA02G0111100ZS;BnaA03G0107100ZS;BnaA10G0138800ZS;BnaC02G0136200ZS;BnaC03G0123700ZS;BnaA02G0238000ZS;BnaA03G0293300ZS;BnaA07G0230600ZS;BnaC02G0319900ZS;BnaC05G0135800ZS;BnaC08G0398700ZS;BnaA04G0013900ZS;BnaA05G0051500ZS;BnaA09G0552000ZS;BnaC04G0057500ZS;BnaC04G0274300ZS;novel.6774;BnaA05G0328400ZS;Bna…	K00026+K00026+K00026+K00026+K00026+K00051+K00051+K00051+K00051+K00051+K00051+K00134+K00134+K00134+K00134+K00134+K00615+K00615+K00615+K00615+K00615+K00615+K00814+K00855+K00855+K00855+K00855+K00855+K00855+K00927+K00927+K00927+K00927+K00927+K00927+K00927+K00927+K00927+K00927+K00927+K00927+K01006+K01006+K01006+K01006+K01100+K01100+K01100+K01100+K01100+K01100+K01595+K01595+K01595+K01595+K01595+K01595+…	https:\\www.genome.jp\dbget-bin\www_bget?map00710
Glyoxylate and dicarboxylate metabolism	ko00630	155 out of 5970 2.5963149078727%	449 out of 32833 1.36752657387385%	4.19598e-12	5.83241e-10	BnaC09G0561100ZS;BnaA02G0032600ZS;BnaA10G0248000ZS;BnaC02G0036000ZS;novel.9515;BnaA01G0048600ZS;BnaC01G0055600ZS;BnaC09G0604900ZS;BnaA03G0201500ZS;BnaA10G0286200ZS;BnaC03G0238000ZS;BnaC04G0580500ZS;BnaA06G0043400ZS;BnaC03G0419600ZS;BnaC06G0024800ZS;BnaA01G0011100ZS;BnaA07G0325000ZS;BnaA08G0052000ZS;BnaA08G0189700ZS;BnaC01G0013200ZS;BnaC01G0062600ZS;BnaC03G0684400ZS;BnaC08G0212500ZS;BnaC08G0510600…	K00026+K00026+K00026+K00026+K00026+K00281+K00281+K00284+K00284+K00284+K00284+K00284+K00382+K00382+K00382+K00600+K00600+K00600+K00600+K00600+K00600+K00600+K00605+K00605+K00605+K00605+K00605+K00626+K00626+K00830+K00830+K00830+K00830+K01433+K01433+K01433+K01455+K01455+K01455+K01455+K01601+K01601+K01601+K01602+K01602+K01602+K01602+K01602+K01602+K01602+K01602+K01602+K01602+K01602+K01647+K01647+K01647+…	https:\\www.genome.jp\dbget-bin\www_bget?map00630
Biosynthesis of secondary metabolites	ko01110	1913 out of 5970 32.0435510887772%	7179 out of 32833 21.8651966009807%	4.13767e-11	5.75136e-09	BnaC08G0450700ZS;BnaA02G0383900ZS;BnaA09G0597200ZS;BnaC03G0003500ZS;BnaA04G0259700ZS;BnaA05G0025400ZS;BnaC04G0027000ZS;BnaC04G0576800ZS;BnaA07G0285200ZS;BnaC06G0327000ZS;BnaA02G0221800ZS;BnaC09G0561100ZS;BnaA02G0032600ZS;BnaA10G0248000ZS;BnaC02G0036000ZS;novel.9515;BnaC09G0024300ZS;BnaA08G0077100ZS;BnaC08G0109100ZS;BnaA02G0242400ZS;BnaA06G0013000ZS;BnaC06G0076400ZS;BnaC06G0080600ZS;BnaA01G0039900…	K00001+K00001+K00001+K00002+K00006+K00006+K00006+K00006+K00010+K00010+K00021+K00026+K00026+K00026+K00026+K00026+K00036+K00036+K00036+K00052+K00053+K00053+K00053+K00058+K00058+K00058+K00058+K00058+K00058+K00058+K00058+K00058+K00059+K00059+K00059+K00083+K00083+K00083+K00083+K00083+K00083+K00083+K00083+K00083+K00083+K00083+K00083+K00099+K00099+K00099+K00106+K00111+K00121+K00121+K00121+K00121+K00128+…	https:\\www.genome.jp\dbget-bin\www_bget?map01110
Cyanoamino acid metabolism	ko00460	106 out of 5970 1.77554438860972%	331 out of 32833 1.00813206225444%	7.93939e-10	1.10358e-07	BnaA01G0011100ZS;BnaA07G0325000ZS;BnaA08G0052000ZS;BnaA08G0189700ZS;BnaC01G0013200ZS;BnaC01G0062600ZS;BnaC03G0684400ZS;BnaC08G0393500ZS;BnaC08G0393600ZS;BnaC08G0393700ZS;BnaC09G0579200ZS;BnaC09G0579300ZS;BnaC09G0579400ZS;Bnascaffold0027G0010300ZS;Bnascaffold2543G0000100ZS;Bnascaffold3064G0000100ZS;BnaA01G0367800ZS;BnaA03G0105400ZS;BnaA03G0105500ZS;BnaA03G0228700ZS;BnaA04G0005700ZS;BnaA04G0211400Z…	K00600+K00600+K00600+K00600+K00600+K00600+K00600+K01188+K01188+K01188+K01188+K01188+K01188+K01188+K01188+K01188+K01188+K01188+K01188+K01188+K01188+K01188+K01188+K01188+K01188+K01188+K01188+K01188+K01188+K01188+K01188+K01188+K01188+K01188+K01188+K01188+K01188+K01188+K01188+K01188+K01188+K01188+K01188+K01188+K01188+K01188+K01188+K01188+K01188+K01188+K01188+K01188+K01188+K01188+K01188+K01188+K01188+…	https:\\www.genome.jp\dbget-bin\www_bget?map00460
Starch and sucrose metabolism	ko00500	327 out of 5970 5.47738693467337%	1342 out of 32833 4.08735114062072%	4.43678e-09	6.16712e-07	BnaA06G0179000ZS;BnaA06G0371600ZS;BnaA07G0306500ZS;BnaC03G0614900ZS;BnaC08G0280700ZS;BnaC09G0008900ZS;BnaC09G0079300ZS;BnaC09G0159900ZS;BnaA03G0090400ZS;BnaA05G0483600ZS;BnaA07G0335800ZS;BnaC02G0270600ZS;BnaC02G0270900ZS;BnaC03G0102700ZS;BnaC03G0668000ZS;BnaC04G0416700ZS;BnaC06G0287300ZS;BnaC07G0249200ZS;novel.4203;novel.5087;novel.5090;novel.5596;novel.1304;novel.710;novel.8836;novel.9101;novel.…	K00688+K00688+K00688+K00688+K00695+K00695+K00695+K00695+K00695+K00695+K00695+K00695+K00695+K00695+K00695+K00695+K00695+K00695+K00695+K00695+K00695+K00695+K00695+K00695+K00695+K00695+K00695+K00695+K00696+K00696+K00696+K00696+K00696+K00696+K00696+K00700+K00700+K00700+K00700+K00703+K00703+K00703+K00703+K00703+K00703+K00705+K00705+K00706+K00706+K00706+K00706+K00844+K00844+K00844+K00847+K00847+K00847+…	https:\\www.genome.jp\dbget-bin\www_bget?map00500
Tryptophan metabolism	ko00380	138 out of 5970 2.31155778894472%	476 out of 32833 1.44976091127829%	4.52565e-09	6.29066e-07	BnaC08G0284400ZS;BnaA01G0023600ZS;BnaA01G0039400ZS;BnaA03G0554200ZS;BnaA05G0389400ZS;BnaA06G0170700ZS;BnaA08G0182200ZS;BnaA08G0235200ZS;BnaC01G0027700ZS;BnaC01G0045100ZS;BnaC03G0694900ZS;BnaC05G0208700ZS;BnaC07G0530700ZS;BnaA06G0043400ZS;BnaC03G0419600ZS;BnaC06G0024800ZS;BnaC09G0250500ZS;BnaA09G0047500ZS;BnaA07G0389000ZS;BnaC06G0457800ZS;BnaA05G0175500ZS;BnaC05G0295800ZS;novel.4052;novel.8233;nov…	K00128+K00128+K00128+K00128+K00128+K00128+K00128+K00128+K00128+K00128+K00128+K00128+K00128+K00382+K00382+K00382+K00626+K00626+K00837+K00837+K01237+K01237+K01237+K01237+K01237+K01237+K01237+K01237+K01237+K01426+K01426+K01426+K01426+K01426+K01501+K01501+K01501+K01593+K01593+K03781+K03781+K03781+K03781+K03781+K03781+K03781+K03781+K03781+K03781+K03781+K03781+K03781+K11812+K11812+K11812+K11812+K11812+…	https:\\www.genome.jp\dbget-bin\www_bget?map00380
Riboflavin metabolism	ko00740	49 out of 5970 0.820770519262982%	120 out of 32833 0.365485944019736%	5.97555e-09	8.30601e-07	BnaA07G0000800ZS;BnaC08G0352200ZS;BnaC08G0406900ZS;BnaA01G0076300ZS;BnaA01G0076400ZS;BnaA03G0511800ZS;BnaA05G0015100ZS;BnaA07G0217300ZS;BnaA08G0287300ZS;BnaA09G0510700ZS;BnaC01G0091800ZS;BnaC01G0091900ZS;BnaC03G0778100ZS;BnaC04G0015500ZS;novel.4159;novel.8160;BnaC03G0725200ZS;BnaC08G0230600ZS;BnaA02G0318800ZS;BnaA05G0381600ZS;BnaA06G0405600ZS;BnaA06G0405700ZS;BnaA08G0270600ZS;BnaC02G0430300ZS;Bna…	K00793+K01513+K01513+K01513+K01513+K01513+K01513+K01513+K01513+K01513+K01513+K01513+K01513+K01513+K01513+K01513+K11752+K14379+K14379+K14379+K14379+K14379+K14379+K14379+K14379+K14379+K14379+K14379+K14652+K14652+K14652+K14652+K14652+K20860+K20860+K20884+K20884+K20884+K20884+K20884+K20884+K20884+K20884+K20884+K22912+K22912+K22912+K22912+K22949	https:\\www.genome.jp\dbget-bin\www_bget?map00740
Glucosinolate biosynthesis	ko00966	48 out of 5970 0.804020100502513%	123 out of 32833 0.37462309262023%	4.68952e-08	6.51843e-06	BnaC08G0199000ZS;BnaC08G0298700ZS;BnaA02G0158700ZS;BnaA06G0032400ZS;BnaA06G0063200ZS;BnaA08G0290800ZS;BnaC05G0078800ZS;BnaA01G0008700ZS;BnaA03G0567100ZS;BnaA08G0192100ZS;BnaC03G0681300ZS;BnaC07G0541500ZS;BnaA04G0145000ZS;BnaC04G0436200ZS;BnaA07G0001300ZS;BnaA09G0123400ZS;BnaC07G0005900ZS;BnaA09G0448300ZS;BnaC05G0210800ZS;novel.3187;BnaA06G0110600ZS;BnaC05G0136700ZS;BnaA04G0074700ZS;BnaA04G0267400…	K00826+K00826+K00826+K00826+K00826+K00826+K00826+K11812+K11812+K11812+K11812+K11812+K11813+K11813+K11819+K11819+K11819+K11820+K11820+K11821+K12154+K12154+K12156+K12156+K12156+K12156+K15741+K15741+K15741+K15741+K15741+K15741+K21346+K21346+K21346+K21346+K21359+K21359+K21360+K21360+K22321+K22321+K22321+K22321+K22321+K22321+K22321+K22321	https:\\www.genome.jp\dbget-bin\www_bget?map00966
Cutin, suberine and wax biosynthesis	ko00073	90 out of 5970 1.50753768844221%	288 out of 32833 0.877166265647367%	5.23255e-08	7.27325e-06	BnaC08G0364800ZS;BnaA01G0042600ZS;BnaA03G0095100ZS;BnaA06G0188700ZS;BnaA06G0257000ZS;BnaA08G0139800ZS;BnaA10G0163900ZS;BnaC01G0048500ZS;BnaC02G0110800ZS;BnaC03G0107600ZS;BnaC03G0579500ZS;BnaC03G0597600ZS;BnaC03G0752500ZS;BnaA02G0248800ZS;BnaA10G0004100ZS;BnaC02G0332800ZS;BnaC05G0006000ZS;BnaC08G0291200ZS;BnaA01G0141100ZS;BnaA02G0156800ZS;BnaA03G0197500ZS;BnaA03G0529500ZS;BnaA04G0122700ZS;BnaA06G0…	K13356+K13356+K13356+K13356+K13356+K13356+K13356+K13356+K13356+K13356+K13356+K13356+K13356+K15398+K15398+K15398+K15398+K15400+K15400+K15400+K15400+K15400+K15400+K15400+K15400+K15400+K15400+K15400+K15400+K15400+K15400+K15400+K15400+K15400+K15400+K15400+K15400+K15400+K15400+K15401+K15401+K15401+K15401+K15402+K15402+K15402+K15402+K15402+K15403+K15404+K15404+K15404+K15404+K15404+K15404+K15404+K15405+…	https:\\www.genome.jp\dbget-bin\www_bget?map00073
Ubiquinone and other terpenoid-quinone biosynthesis	ko00130	74 out of 5970 1.23953098827471%	224 out of 32833 0.682240428836841%	6.51548e-08	9.05652e-06	BnaA10G0046800ZS;BnaC05G0047700ZS;BnaA03G0147400ZS;BnaA04G0196700ZS;BnaA04G0196800ZS;BnaA05G0132000ZS;BnaC03G0171900ZS;BnaC04G0174600ZS;BnaC04G0500400ZS;BnaC04G0500500ZS;BnaC08G0458300ZS;BnaA03G0238000ZS;BnaA03G0473600ZS;BnaA03G0504500ZS;BnaA05G0144400ZS;BnaA09G0604200ZS;BnaC06G0001700ZS;BnaC06G0151600ZS;BnaC07G0451900ZS;novel.1470;novel.8853;BnaC09G0186400ZS;BnaA09G0166800ZS;BnaC09G0137200ZS;Bna…	K00457+K00457+K00487+K00487+K00487+K00487+K00487+K00487+K00487+K00487+K00815+K00815+K00815+K00815+K00815+K00815+K00815+K00815+K00815+K00815+K00815+K01661+K01661+K01904+K01904+K01904+K01904+K01904+K01904+K01904+K01904+K01904+K01904+K01904+K01904+K01904+K01904+K02552+K02552+K02552+K02552+K03809+K03809+K03809+K03809+K05928+K05928+K05928+K05928+K09833+K09833+K09834+K09834+K09834+K12501+K12501+K12501+…	https:\\www.genome.jp\dbget-bin\www_bget?map00130
Plant-pathogen interaction	ko04626	605 out of 5970 10.1340033500838%	2759 out of 32833 8.40313099625377%	1.04475e-07	1.4522e-05	BnaA01G0189800ZS;BnaA03G0050100ZS;BnaA06G0256000ZS;BnaA07G0171200ZS;BnaC03G0058000ZS;BnaC07G0317400ZS;Bnascaffold0026G0068100ZS;BnaA01G0109200ZS;BnaA03G0457600ZS;BnaA06G0434400ZS;BnaA07G0051600ZS;BnaC01G0132800ZS;BnaC03G0718900ZS;BnaC07G0232700ZS;BnaC07G0433400ZS;novel.9428;novel.1974;BnaC09G0274900ZS;BnaC02G0160100ZS;BnaC05G0282400ZS;BnaA03G0115500ZS;BnaC03G0133700ZS;BnaC08G0235800ZS;BnaC08G0253…	K01373+K02183+K02183+K02183+K02183+K02183+K02358+K02358+K02358+K02358+K02358+K02358+K02358+K02358+K02358+K02358+K02358+K04079+K04079+K04079+K04368+K04368+K05391+K05391+K05391+K05391+K05391+K05391+K05391+K05391+K05391+K05391+K05391+K05391+K05391+K05391+K05391+K05391+K05391+K05391+K05391+K05391+K05391+K05391+K05391+K05391+K05391+K05391+K05391+K05391+K05391+K05391+K05391+K05391+K05391+K05391+K05391+…	https:\\www.genome.jp\dbget-bin\www_bget?map04626
Glycerolipid metabolism	ko00561	157 out of 5970 2.62981574539364%	588 out of 32833 1.79088112569671%	1.70814e-07	2.37432e-05	BnaC03G0003500ZS;BnaC08G0284400ZS;BnaA01G0023600ZS;BnaA01G0039400ZS;BnaA03G0554200ZS;BnaA05G0389400ZS;BnaA06G0170700ZS;BnaA08G0182200ZS;BnaA08G0235200ZS;BnaC01G0027700ZS;BnaC01G0045100ZS;BnaC03G0694900ZS;BnaC05G0208700ZS;BnaC07G0530700ZS;BnaA05G0326300ZS;BnaA08G0075600ZS;BnaC05G0343500ZS;BnaC08G0107200ZS;BnaC08G0208800ZS;BnaA04G0215000ZS;BnaA05G0108000ZS;BnaA06G0073900ZS;BnaA07G0258700ZS;BnaA07G0…	K00002+K00128+K00128+K00128+K00128+K00128+K00128+K00128+K00128+K00128+K00128+K00128+K00128+K00128+K00630+K00630+K00630+K00630+K00655+K00655+K00655+K00655+K00655+K00655+K00655+K00655+K00655+K00655+K00655+K00655+K00679+K00679+K00679+K00679+K00679+K00679+K00679+K00679+K00679+K00679+K00679+K00679+K00679+K00679+K00679+K00679+K00679+K00679+K00679+K00679+K00679+K00679+K00679+K00679+K00679+K00679+K00679+…	https:\\www.genome.jp\dbget-bin\www_bget?map00561
Glutathione metabolism	ko00480	132 out of 5970 2.21105527638191%	479 out of 32833 1.45889805987878%	2.4554e-07	3.413e-05	BnaC09G0024300ZS;BnaA08G0077100ZS;BnaC08G0109100ZS;BnaC08G0346500ZS;BnaA09G0505500ZS;BnaC08G0428600ZS;BnaA03G0529000ZS;BnaA07G0222500ZS;BnaA09G0577200ZS;BnaC04G0257400ZS;BnaC06G0239400ZS;BnaC07G0506700ZS;BnaA03G0249400ZS;BnaA03G0399300ZS;BnaA03G0531500ZS;BnaA03G0547400ZS;BnaA07G0368900ZS;BnaC03G0295500ZS;BnaC03G0497700ZS;BnaC06G0433300ZS;BnaC07G0509200ZS;BnaC07G0523900ZS;BnaC07G0171800ZS;BnaC08G0…	K00036+K00036+K00036+K00383+K00383+K00432+K00432+K00432+K00432+K00432+K00432+K00432+K00434+K00434+K00434+K00434+K00434+K00434+K00434+K00434+K00434+K00434+K00797+K00799+K00799+K00799+K00799+K00799+K00799+K00799+K00799+K00799+K00799+K00799+K00799+K00799+K00799+K00799+K00799+K00799+K00799+K00799+K00799+K00799+K00799+K00799+K00799+K00799+K00799+K00799+K00799+K00799+K00799+K00799+K00799+K00799+K00799+…	https:\\www.genome.jp\dbget-bin\www_bget?map00480
Glycine, serine and threonine metabolism	ko00260	125 out of 5970 2.09380234505863%	450 out of 32833 1.37057229007401%	3.17566e-07	4.41417e-05	BnaA01G0039900ZS;BnaA03G0358500ZS;BnaA03G0543100ZS;BnaA08G0136800ZS;BnaA08G0260300ZS;BnaC01G0045700ZS;BnaC03G0436800ZS;BnaC03G0747700ZS;BnaC07G0519100ZS;BnaC08G0217900ZS;BnaC08G0359400ZS;BnaC08G0359500ZS;BnaC08G0359600ZS;BnaA08G0278500ZS;BnaA09G0517000ZS;BnaA09G0517100ZS;BnaC06G0131700ZS;BnaA06G0098000ZS;BnaA04G0296800ZS;BnaA08G0083500ZS;BnaA08G0083600ZS;BnaC01G0252100ZS;BnaC02G0357300ZS;BnaC04G0…	K00058+K00058+K00058+K00058+K00058+K00058+K00058+K00058+K00058+K00108+K00108+K00108+K00108+K00108+K00108+K00108+K00130+K00133+K00276+K00276+K00276+K00276+K00276+K00276+K00281+K00281+K00306+K00306+K00382+K00382+K00382+K00499+K00499+K00600+K00600+K00600+K00600+K00600+K00600+K00600+K00605+K00605+K00605+K00605+K00605+K00827+K00827+K00827+K00827+K00827+K00827+K00830+K00830+K00830+K00830+K00831+K00831+…	https:\\www.genome.jp\dbget-bin\www_bget?map00260
Flavonoid biosynthesis	ko00941	73 out of 5970 1.22278056951424%	233 out of 32833 0.709651874638321%	8.10313e-07	0.000112634	BnaC08G0314600ZS;BnaA09G0476900ZS;BnaA03G0147400ZS;BnaA04G0196700ZS;BnaA04G0196800ZS;BnaA05G0132000ZS;BnaC03G0171900ZS;BnaC04G0174600ZS;BnaC04G0500400ZS;BnaC04G0500500ZS;BnaA02G0170100ZS;BnaA03G0541500ZS;BnaA08G0089300ZS;BnaC02G0218400ZS;BnaC08G0127300ZS;BnaC08G0127400ZS;novel.4489;novel.5122;novel.5805;novel.10077;novel.1084;BnaC09G0593800ZS;BnaA07G0191700ZS;BnaA10G0276200ZS;BnaC06G0078300ZS;Bna…	K00475+K00475+K00487+K00487+K00487+K00487+K00487+K00487+K00487+K00487+K00588+K00588+K00588+K00588+K00588+K00588+K00660+K00660+K00660+K00660+K00660+K01859+K01859+K01859+K01859+K05277+K05278+K05278+K05278+K05278+K05278+K05278+K05278+K05278+K05278+K05278+K05278+K05278+K05278+K05280+K05280+K08243+K08243+K08243+K09754+K13065+K13065+K13065+K13065+K13065+K13065+K13065+K13065+K13065+K13065+K13065+K13065+…	https:\\www.genome.jp\dbget-bin\www_bget?map00941
Stilbenoid, diarylheptanoid and gingerol biosynthesis	ko00945	42 out of 5970 0.703517587939699%	113 out of 32833 0.344165930618585%	1.45348e-06	0.000202034	BnaA03G0147400ZS;BnaA04G0196700ZS;BnaA04G0196800ZS;BnaA05G0132000ZS;BnaC03G0171900ZS;BnaC04G0174600ZS;BnaC04G0500400ZS;BnaC04G0500500ZS;BnaA02G0170100ZS;BnaA03G0541500ZS;BnaA08G0089300ZS;BnaC02G0218400ZS;BnaC08G0127300ZS;BnaC08G0127400ZS;novel.8218;BnaC08G0441800ZS;BnaC09G0614200ZS;BnaA01G0197600ZS;BnaA02G0009800ZS;BnaA02G0056700ZS;BnaA02G0276300ZS;BnaA02G0369900ZS;BnaA04G0073500ZS;BnaA04G0150900…	K00487+K00487+K00487+K00487+K00487+K00487+K00487+K00487+K00588+K00588+K00588+K00588+K00588+K00588+K09754+K13065+K13065+K13065+K13065+K13065+K13065+K13065+K13065+K13065+K13065+K13065+K13065+K13065+K13065+K13065+K13065+K13065+K13065+K13065+K13065+K13065+K13065+K13065+K13065+K13065+K13065+K13065	https:\\www.genome.jp\dbget-bin\www_bget?map00945
Alanine, aspartate and glutamate metabolism	ko00250	84 out of 5970 1.4070351758794%	291 out of 32833 0.88630341424786%	5.19969e-06	0.000722757	BnaC09G0483800ZS;BnaC09G0483900ZS;BnaA01G0405900ZS;BnaA03G0027700ZS;BnaA10G0190000ZS;BnaC01G0508900ZS;BnaC02G0027900ZS;BnaA03G0129800ZS;BnaC03G0150600ZS;BnaA07G0036400ZS;BnaC01G0040600ZS;novel.6774;BnaA02G0299800ZS;BnaA03G0184700ZS;BnaC01G0007500ZS;BnaC02G0408900ZS;BnaC03G0216700ZS;novel.1320;BnaC09G0104800ZS;BnaA03G0390800ZS;BnaA09G0104000ZS;BnaC03G0483800ZS;BnaC09G0256000ZS;BnaC09G0491600ZS;Bna…	K00261+K00261+K00261+K00261+K00261+K00261+K00261+K00264+K00264+K00764+K00764+K00814+K00827+K00827+K00827+K00827+K00827+K00827+K00830+K00830+K00830+K00830+K01580+K01580+K01580+K01580+K01580+K01580+K01580+K01580+K01580+K01915+K01915+K01915+K01915+K01915+K01915+K01915+K01915+K01915+K01915+K01915+K01915+K01915+K01915+K01915+K01915+K01939+K01939+K01953+K01953+K01953+K01953+K01953+K01953+K01953+K01953+…	https:\\www.genome.jp\dbget-bin\www_bget?map00250
ABC transporters	ko02010	97 out of 5970 1.62479061976549%	356 out of 32833 1.08427496725855%	1.48208e-05	0.00206009	BnaA01G0227000ZS;BnaA06G0261200ZS;BnaA07G0067800ZS;BnaC01G0290400ZS;BnaC03G0575300ZS;BnaC07G0102000ZS;BnaA07G0266700ZS;BnaC06G0299800ZS;BnaC08G0164700ZS;BnaC08G0164800ZS;BnaC08G0476000ZS;BnaC09G0026900ZS;Bnascaffold0024G0000200ZS;BnaA01G0045000ZS;BnaA01G0148700ZS;BnaA01G0154600ZS;BnaA01G0307000ZS;BnaA03G0445100ZS;BnaA04G0296500ZS;BnaA05G0008100ZS;BnaA05G0008800ZS;BnaA06G0368200ZS;BnaA08G0173300ZS…	K05643+K05643+K05643+K05643+K05643+K05643+K05656+K05656+K05658+K05658+K05658+K05658+K05658+K05658+K05658+K05658+K05658+K05658+K05658+K05658+K05658+K05658+K05658+K05658+K05658+K05658+K05658+K05658+K05658+K05658+K05658+K05658+K05658+K05658+K05658+K05658+K05658+K05658+K05658+K05658+K05658+K05658+K05658+K05665+K05665+K05665+K05665+K05665+K05666+K05666+K05666+K05677+K05677+K05681+K05681+K05681+K05681+…	https:\\www.genome.jp\dbget-bin\www_bget?map02010
Zeatin biosynthesis	ko00908	49 out of 5970 0.820770519262982%	154 out of 32833 0.469040294825328%	3.0817e-05	0.00428356	BnaC08G0420600ZS;BnaA02G0120800ZS;BnaA03G0203000ZS;BnaC02G0107100ZS;BnaC03G0239900ZS;BnaA03G0086000ZS;BnaC03G0098500ZS;BnaA02G0164000ZS;BnaC02G0210000ZS;BnaC04G0380600ZS;BnaC09G0474600ZS;BnaA02G0076800ZS;BnaA07G0075700ZS;BnaA10G0183600ZS;BnaC02G0090600ZS;BnaC06G0312200ZS;BnaC07G0117300ZS;BnaC08G0356400ZS;BnaC09G0588900ZS;BnaC09G0589000ZS;BnaC09G0589100ZS;BnaC09G0589400ZS;BnaC09G0589500ZS;BnaA03G0…	K00279+K00279+K00279+K00279+K00279+K00791+K00791+K10717+K10717+K10717+K10760+K10760+K10760+K10760+K10760+K10760+K10760+K13493+K13493+K13493+K13493+K13493+K13493+K13493+K13493+K13493+K13493+K13493+K13493+K13493+K13496+K13496+K13496+K13496+K13496+K13496+K13496+K13496+K13496+K13496+K13496+K13496+K23452+K23452+K23452+K23452+K23452+K23452+K23452	https:\\www.genome.jp\dbget-bin\www_bget?map00908
Vitamin B6 metabolism	ko00750	24 out of 5970 0.402010050251256%	61 out of 32833 0.185788688210033%	8.73499e-05	0.0121416	BnaA03G0021200ZS;BnaC03G0025700ZS;novel.9938;BnaC09G0115400ZS;BnaA09G0112900ZS;BnaC09G0126400ZS;BnaA02G0203200ZS;BnaA09G0120900ZS;BnaC09G0357600ZS;BnaA08G0306200ZS;BnaA10G0100500ZS;BnaC08G0024900ZS;BnaA01G0344100ZS;BnaA03G0003200ZS;BnaA04G0245700ZS;BnaC01G0425000ZS;BnaC03G0005300ZS;BnaC04G0560700ZS;BnaA02G0098100ZS;BnaA02G0098300ZS;BnaA10G0157500ZS;BnaC02G0118000ZS;BnaA06G0121600ZS;BnaC05G0149700…	K00275+K00275+K00275+K00831+K00831+K01733+K01733+K01733+K05275+K05275+K05275+K05275+K06215+K06215+K06215+K06215+K06215+K06215+K08681+K08681+K08681+K08681+K13248+K13248	https:\\www.genome.jp\dbget-bin\www_bget?map00750
Pentose phosphate pathway	ko00030	87 out of 5970 1.4572864321608%	326 out of 32833 0.992903481253617%	8.81922e-05	0.0122587	BnaC09G0024300ZS;BnaA08G0077100ZS;BnaC08G0109100ZS;BnaC08G0433500ZS;BnaA04G0160500ZS;BnaA09G0581000ZS;BnaC04G0455800ZS;BnaC08G0398700ZS;BnaA04G0013900ZS;BnaA05G0051500ZS;BnaA09G0552000ZS;BnaC04G0057500ZS;BnaC04G0274300ZS;BnaC09G0526900ZS;BnaA02G0048000ZS;BnaA03G0053300ZS;BnaA10G0222100ZS;BnaC02G0055400ZS;BnaA01G0050200ZS;BnaA01G0157600ZS;BnaA02G0026300ZS;BnaA06G0138600ZS;BnaA06G0138900ZS;BnaA08G0…	K00036+K00036+K00036+K00131+K00131+K00131+K00131+K00615+K00615+K00615+K00615+K00615+K00615+K00616+K00616+K00616+K00616+K00616+K00850+K00850+K00850+K00850+K00850+K00850+K00850+K00850+K00850+K00850+K00850+K00850+K00850+K00850+K00850+K00850+K00850+K00850+K00850+K00895+K00895+K00895+K00895+K00895+K00948+K01057+K01057+K01057+K01623+K01623+K01623+K01623+K01623+K01623+K01623+K01623+K01623+K01623+K01623+…	https:\\www.genome.jp\dbget-bin\www_bget?map00030
Fructose and mannose metabolism	ko00051	100 out of 5970 1.6750418760469%	387 out of 32833 1.17869216946365%	0.000106798	0.0148449	BnaC09G0341100ZS;BnaA10G0089600ZS;BnaC08G0019700ZS;BnaC08G0019800ZS;BnaA10G0056100ZS;BnaC06G0022700ZS;novel.9541;BnaC08G0341300ZS;BnaA03G0151300ZS;BnaA04G0021200ZS;BnaA04G0205700ZS;BnaA05G0126000ZS;BnaA07G0307500ZS;BnaA09G0500800ZS;BnaA10G0088800ZS;BnaC03G0177100ZS;BnaC03G0420000ZS;BnaC04G0286400ZS;BnaC04G0512300ZS;BnaC06G0356900ZS;BnaA01G0050200ZS;BnaA01G0157600ZS;BnaA02G0026300ZS;BnaA06G0138600…	K00008+K00008+K00008+K00008+K00844+K00844+K00844+K00847+K00847+K00847+K00847+K00847+K00847+K00847+K00847+K00847+K00847+K00847+K00847+K00847+K00850+K00850+K00850+K00850+K00850+K00850+K00850+K00850+K00850+K00850+K00850+K00850+K00850+K00850+K00850+K00850+K00850+K00850+K00850+K00895+K00895+K00895+K00895+K00895+K00966+K00966+K01103+K01103+K01103+K01623+K01623+K01623+K01623+K01623+K01623+K01623+K01623+…	https:\\www.genome.jp\dbget-bin\www_bget?map00051
Glycolysis / Gluconeogenesis	ko00010	173 out of 5970 2.89782244556114%	732 out of 32833 2.22946425852039%	0.000107129	0.014891	BnaC08G0450700ZS;BnaA02G0383900ZS;BnaA09G0597200ZS;BnaC03G0003500ZS;BnaA01G0121600ZS;BnaA07G0122900ZS;BnaA09G0461800ZS;BnaC07G0180700ZS;BnaC08G0284400ZS;BnaA01G0023600ZS;BnaA01G0039400ZS;BnaA03G0554200ZS;BnaA05G0389400ZS;BnaA06G0170700ZS;BnaA08G0182200ZS;BnaA08G0235200ZS;BnaC01G0027700ZS;BnaC01G0045100ZS;BnaC03G0694900ZS;BnaC05G0208700ZS;BnaC07G0530700ZS;BnaC08G0433500ZS;BnaA04G0160500ZS;BnaA09G0…	K00001+K00001+K00001+K00002+K00121+K00121+K00121+K00121+K00128+K00128+K00128+K00128+K00128+K00128+K00128+K00128+K00128+K00128+K00128+K00128+K00128+K00131+K00131+K00131+K00131+K00134+K00134+K00134+K00134+K00134+K00382+K00382+K00382+K00844+K00844+K00844+K00850+K00850+K00850+K00850+K00850+K00850+K00850+K00850+K00850+K00850+K00850+K00850+K00850+K00850+K00850+K00850+K00850+K00850+K00850+K00873+K00873+…	https:\\www.genome.jp\dbget-bin\www_bget?map00010
Biosynthesis of amino acids	ko01230	283 out of 5970 4.74036850921273%	1288 out of 32833 3.92288246581184%	0.000247375	0.0343851	BnaA02G0242400ZS;BnaA06G0013000ZS;BnaC06G0076400ZS;BnaC06G0080600ZS;BnaA01G0039900ZS;BnaA03G0358500ZS;BnaA03G0543100ZS;BnaA08G0136800ZS;BnaA08G0260300ZS;BnaC01G0045700ZS;BnaC03G0436800ZS;BnaC03G0747700ZS;BnaC07G0519100ZS;BnaA06G0098000ZS;BnaA02G0238000ZS;BnaA03G0293300ZS;BnaA07G0230600ZS;BnaC02G0319900ZS;BnaC05G0135800ZS;BnaA03G0129800ZS;BnaC03G0150600ZS;BnaA03G0292400ZS;BnaC03G0351200ZS;BnaC05G0…	K00052+K00053+K00053+K00053+K00058+K00058+K00058+K00058+K00058+K00058+K00058+K00058+K00058+K00133+K00134+K00134+K00134+K00134+K00134+K00264+K00264+K00549+K00549+K00549+K00600+K00600+K00600+K00600+K00600+K00600+K00600+K00615+K00615+K00615+K00615+K00615+K00615+K00616+K00616+K00616+K00616+K00616+K00620+K00640+K00640+K00640+K00640+K00640+K00641+K00765+K00765+K00765+K00789+K00789+K00814+K00818+K00818+…	https:\\www.genome.jp\dbget-bin\www_bget?map01230
Fatty acid elongation	ko00062	45 out of 5970 0.753768844221106%	152 out of 32833 0.462948862424999%	0.000398071	0.0553319	BnaA03G0279800ZS;BnaA01G0177200ZS;BnaC01G0227100ZS;BnaA07G0102200ZS;BnaC07G0154300ZS;BnaC09G0552800ZS;BnaA02G0102800ZS;BnaC03G0047500ZS;BnaC08G0422900ZS;BnaC08G0450600ZS;BnaA01G0004400ZS;BnaA01G0022000ZS;BnaA04G0140000ZS;BnaA04G0173100ZS;BnaA05G0012000ZS;BnaA06G0045100ZS;BnaA06G0135600ZS;BnaA06G0136500ZS;BnaA07G0020300ZS;BnaA07G0037000ZS;BnaA07G0037100ZS;BnaA07G0043200ZS;BnaA07G0275100ZS;BnaA08G0…	K01068+K01074+K01074+K10251+K10251+K10703+K10703+K10703+K15397+K15397+K15397+K15397+K15397+K15397+K15397+K15397+K15397+K15397+K15397+K15397+K15397+K15397+K15397+K15397+K15397+K15397+K15397+K15397+K15397+K15397+K15397+K15397+K15397+K15397+K15397+K15397+K15397+K15397+K15397+K15397+K15397+K15397+K15397+K15397+K15397	https:\\www.genome.jp\dbget-bin\www_bget?map00062
Glycosaminoglycan degradation	ko00531	49 out of 5970 0.820770519262982%	172 out of 32833 0.523863186428289%	0.000600911	0.0835266	BnaA02G0050000ZS;BnaC02G0057600ZS;BnaA03G0407200ZS;BnaC07G0379900ZS;BnaA02G0373000ZS;BnaA06G0367100ZS;BnaA08G0095500ZS;BnaC02G0499200ZS;BnaC08G0137100ZS;BnaC08G0376700ZS;BnaC09G0098400ZS;BnaC09G0255600ZS;BnaC09G0256500ZS;BnaC09G0256600ZS;BnaC09G0444300ZS;BnaA01G0233800ZS;BnaA01G0357700ZS;BnaA02G0095900ZS;BnaA02G0121300ZS;BnaA02G0286300ZS;BnaA02G0320500ZS;BnaA03G0009200ZS;BnaA03G0232200ZS;BnaA05G0…	K01205+K01205+K07964+K07964+K10532+K10532+K10532+K10532+K10532+K12309+K12309+K12309+K12309+K12309+K12309+K12309+K12309+K12309+K12309+K12309+K12309+K12309+K12309+K12309+K12309+K12309+K12309+K12309+K12309+K12309+K12309+K12309+K12309+K12309+K12309+K12309+K12309+K12309+K12309+K12309+K12309+K12309+K12309+K12309+K12309+K12309+K12309+K12373+K12373	https:\\www.genome.jp\dbget-bin\www_bget?map00531
Histidine metabolism	ko00340	51 out of 5970 0.85427135678392%	182 out of 32833 0.554320348429933%	0.000714258	0.0992818	BnaC08G0284400ZS;BnaA01G0023600ZS;BnaA01G0039400ZS;BnaA03G0554200ZS;BnaA05G0389400ZS;BnaA06G0170700ZS;BnaA08G0182200ZS;BnaA08G0235200ZS;BnaC01G0027700ZS;BnaC01G0045100ZS;BnaC03G0694900ZS;BnaC05G0208700ZS;BnaC07G0530700ZS;BnaC09G0198100ZS;BnaA06G0060300ZS;BnaC05G0075600ZS;novel.1664;BnaC03G0202500ZS;novel.4578;novel.4710;novel.5028;novel.5029;novel.5620;novel.5629;novel.5731;novel.5916;novel.6002;…	K00128+K00128+K00128+K00128+K00128+K00128+K00128+K00128+K00128+K00128+K00128+K00128+K00128+K00765+K00765+K00765+K01693+K01814+K14085+K14085+K14085+K14085+K14085+K14085+K14085+K14085+K14085+K14085+K14085+K14085+K14085+K14085+K14085+K14085+K14085+K14085+K14085+K14085+K14085+K14152+K14152+K14152+K14152+K14152+K14152+K14152+K14152+K14152+K14152+K14152+K19787	https:\\www.genome.jp\dbget-bin\www_bget?map00340
Monoterpenoid biosynthesis	ko00902	10 out of 5970 0.16750418760469%	20 out of 32833 0.0609143240032894%	0.00121277	0.168575	BnaC08G0434400ZS;BnaA03G0240000ZS;BnaC03G0283300ZS;BnaC03G0304500ZS;BnaA09G0159800ZS;BnaA09G0160000ZS;BnaC08G0401600ZS;BnaA04G0011500ZS;BnaA09G0554800ZS;BnaC04G0270300ZS	K07385+K12467+K12467+K12467+K15086+K15086+K15095+K15095+K15095+K15095	https:\\www.genome.jp\dbget-bin\www_bget?map00902
Isoquinoline alkaloid biosynthesis	ko00950	60 out of 5970 1.00502512562814%	227 out of 32833 0.691377577437334%	0.00128771	0.178992	BnaA04G0296800ZS;BnaA08G0083500ZS;BnaA08G0083600ZS;BnaC01G0252100ZS;BnaC02G0357300ZS;BnaC04G0613900ZS;BnaC08G0458300ZS;BnaA03G0238000ZS;BnaA03G0473600ZS;BnaA03G0504500ZS;BnaA05G0144400ZS;BnaA09G0604200ZS;BnaC06G0001700ZS;BnaC06G0151600ZS;BnaC07G0451900ZS;novel.1470;novel.8853;BnaA01G0083700ZS;BnaC01G0102000ZS;BnaA07G0003700ZS;BnaC04G0403200ZS;BnaC08G0274600ZS;BnaA02G0191100ZS;BnaA04G0102600ZS;Bna…	K00276+K00276+K00276+K00276+K00276+K00276+K00815+K00815+K00815+K00815+K00815+K00815+K00815+K00815+K00815+K00815+K00815+K01592+K01592+K01593+K01593+K01742+K01742+K01742+K01742+K01742+K01742+K01742+K01742+K01742+K01742+K01742+K01742+K01742+K01742+K01742+K01742+K01742+K01742+K01742+K01742+K01742+K01742+K13384+K13384+K13384+K14454+K14454+K14454+K14454+K14454+K14454+K14454+K14455+K14975+K15849+K15849+…	https:\\www.genome.jp\dbget-bin\www_bget?map00950
Phenylalanine, tyrosine and tryptophan biosynthesis	ko00400	65 out of 5970 1.08877721943049%	250 out of 32833 0.761429050041117%	0.00131412	0.182663	BnaC08G0458300ZS;BnaA03G0238000ZS;BnaA03G0473600ZS;BnaA03G0504500ZS;BnaA05G0144400ZS;BnaA09G0604200ZS;BnaC06G0001700ZS;BnaC06G0151600ZS;BnaC07G0451900ZS;novel.1470;novel.8853;BnaA06G0387100ZS;BnaC01G0006100ZS;BnaC04G0432500ZS;BnaC04G0540100ZS;BnaC07G0300500ZS;BnaA03G0384700ZS;BnaA06G0365700ZS;BnaC02G0065600ZS;BnaC07G0327000ZS;BnaC08G0272200ZS;BnaA01G0044300ZS;BnaA09G0461900ZS;BnaC01G0010600ZS;Bna…	K00815+K00815+K00815+K00815+K00815+K00815+K00815+K00815+K00815+K00815+K00815+K00891+K00891+K00891+K00891+K00891+K01609+K01609+K01609+K01609+K01626+K01626+K01626+K01626+K01626+K01626+K01657+K01657+K01657+K01657+K01658+K01696+K01696+K01850+K01850+K01850+K05359+K05359+K05359+K05359+K05359+K05359+K05359+K05359+K05359+K05359+K05359+K06001+K06001+K06001+K06001+K13832+K13832+K13832+K13832+K14454+K14454+…	https:\\www.genome.jp\dbget-bin\www_bget?map00400
Plant hormone signal transduction	ko04075	467 out of 5970 7.82244556113903%	2271 out of 32833 6.91682149057351%	0.00143547	0.19953	BnaA03G0270300ZS;BnaA03G0407400ZS;BnaA05G0010000ZS;BnaA09G0026700ZS;BnaA10G0010700ZS;BnaC03G0324600ZS;BnaC04G0010300ZS;BnaC04G0455600ZS;BnaC07G0207700ZS;BnaC07G0380100ZS;BnaC09G0039500ZS;BnaC09G0418000ZS;Bnascaffold0026G0050200ZS;BnaA01G0096200ZS;BnaA01G0292900ZS;BnaA02G0110000ZS;BnaA02G0233400ZS;BnaA02G0295500ZS;BnaA03G0207300ZS;BnaA03G0366400ZS;BnaA03G0449400ZS;BnaA04G0202700ZS;BnaA04G0271600ZS…	K12126+K12126+K12126+K12126+K12126+K12126+K12126+K12126+K12126+K12126+K13413+K13413+K13413+K13413+K13413+K13413+K13413+K13413+K13413+K13413+K13413+K13413+K13413+K13413+K13413+K13413+K13413+K13413+K13413+K13413+K13413+K13413+K13413+K13413+K13413+K13413+K13413+K13413+K13413+K13413+K13413+K13413+K13413+K13413+K13413+K13413+K13413+K13415+K13415+K13415+K13415+K13415+K13415+K13415+K13415+K13415+K13415+…	https:\\www.genome.jp\dbget-bin\www_bget?map04075
Thiamine metabolism	ko00730	26 out of 5970 0.435510887772194%	81 out of 32833 0.246703012213322%	0.00179734	0.24983	BnaC09G0032200ZS;BnaA08G0078800ZS;BnaA09G0046500ZS;BnaA10G0063100ZS;BnaC06G0013100ZS;BnaC08G0111500ZS;BnaA08G0321000ZS;BnaA03G0368100ZS;BnaC07G0401700ZS;BnaC09G0372400ZS;BnaA02G0131600ZS;BnaA03G0124100ZS;BnaA10G0109700ZS;BnaC02G0164500ZS;BnaC03G0143700ZS;BnaA05G0139000ZS;BnaC04G0183400ZS;BnaA01G0374600ZS;BnaC01G0467800ZS;BnaC08G0216700ZS;BnaC08G0506300ZS;BnaA06G0083100ZS;BnaA08G0279200ZS;BnaA09G0…	K00939+K00939+K00939+K00939+K00939+K00939+K00949+K01662+K01662+K03146+K03146+K03146+K03146+K03146+K03146+K03147+K03147+K20896+K20896+K22911+K22911+K22911+K22911+K22911+K22911+K22911	https:\\www.genome.jp\dbget-bin\www_bget?map00730
Circadian rhythm - plant	ko04712	99 out of 5970 1.65829145728643%	414 out of 32833 1.26092650686809%	0.00194342	0.270136	novel.4489;novel.5122;novel.5805;novel.10077;novel.1084;BnaA01G0424700ZS;BnaA05G0453300ZS;BnaC01G0063000ZS;BnaC04G0029100ZS;BnaC05G0511400ZS;BnaC07G0256800ZS;BnaC09G0311500ZS;BnaA09G0264500ZS;BnaA10G0025800ZS;BnaC05G0027100ZS;BnaC08G0524800ZS;BnaA09G0661700ZS;BnaA03G0367100ZS;BnaA03G0367200ZS;BnaC03G0448200ZS;BnaA03G0270300ZS;BnaA03G0407400ZS;BnaA05G0010000ZS;BnaA09G0026700ZS;BnaA10G0010700ZS;Bna…	K00660+K00660+K00660+K00660+K00660+K03097+K03097+K03097+K03097+K03097+K03115+K12118+K12118+K12119+K12119+K12120+K12120+K12125+K12125+K12125+K12126+K12126+K12126+K12126+K12126+K12126+K12126+K12126+K12126+K12126+K12127+K12127+K12127+K12129+K12129+K12129+K12129+K12130+K12130+K12130+K12130+K12130+K12130+K12130+K12130+K12131+K12133+K12133+K12135+K12135+K12135+K12135+K12135+K12135+K12135+K12135+K12135+…	https:\\www.genome.jp\dbget-bin\www_bget?map04712
Benzoxazinoid biosynthesis	ko00402	18 out of 5970 0.301507537688442%	51 out of 32833 0.155331526208388%	0.0027589	0.383487	BnaC06G0195900ZS;novel.2536;BnaA08G0315600ZS;BnaA09G0675800ZS;BnaC03G0090500ZS;BnaC04G0504200ZS;BnaC04G0504300ZS;BnaC04G0504400ZS;BnaC07G0220300ZS;BnaC08G0010000ZS;novel.4267;novel.4309;novel.4315;novel.4317;novel.7345;novel.7352;novel.7354;novel.1129	K13227+K13227+K13229+K13229+K13229+K13229+K13229+K13229+K13229+K13229+K13229+K13229+K13229+K13229+K13229+K13229+K13229+K13229	https:\\www.genome.jp\dbget-bin\www_bget?map00402
Arginine biosynthesis	ko00220	47 out of 5970 0.787269681742044%	176 out of 32833 0.536046051228946%	0.00324613	0.451212	BnaC09G0483800ZS;BnaC09G0483900ZS;BnaA01G0405900ZS;BnaA03G0027700ZS;BnaA10G0190000ZS;BnaC01G0508900ZS;BnaC02G0027900ZS;novel.8622;novel.6774;BnaA07G0387600ZS;BnaC06G0455600ZS;BnaC09G0498800ZS;BnaA01G0331500ZS;BnaA03G0351300ZS;BnaA04G0089100ZS;BnaA04G0089200ZS;BnaA04G0096800ZS;BnaA07G0182800ZS;BnaA08G0077600ZS;BnaA10G0200900ZS;BnaC01G0409900ZS;BnaC03G0426200ZS;BnaC04G0369400ZS;BnaC04G0378100ZS;Bna…	K00261+K00261+K00261+K00261+K00261+K00261+K00261+K00620+K00814+K00818+K00818+K01915+K01915+K01915+K01915+K01915+K01915+K01915+K01915+K01915+K01915+K01915+K01915+K01915+K01915+K01915+K01915+K13427+K13427+K13427+K13427+K14272+K14272+K14272+K14272+K14272+K14272+K14272+K14454+K14454+K14454+K14454+K14454+K14454+K14454+K14455+K14682	https:\\www.genome.jp\dbget-bin\www_bget?map00220
Tropane, piperidine and pyridine alkaloid biosynthesis	ko00960	55 out of 5970 0.921273031825796%	215 out of 32833 0.654828983035361%	0.0042386	0.589165	BnaA04G0296800ZS;BnaA08G0083500ZS;BnaA08G0083600ZS;BnaC01G0252100ZS;BnaC02G0357300ZS;BnaC04G0613900ZS;BnaC08G0458300ZS;BnaA03G0238000ZS;BnaA03G0473600ZS;BnaA03G0504500ZS;BnaA05G0144400ZS;BnaA09G0604200ZS;BnaC06G0001700ZS;BnaC06G0151600ZS;BnaC07G0451900ZS;novel.1470;novel.8853;BnaC09G0207000ZS;BnaC09G0207100ZS;BnaC09G0220000ZS;BnaC09G0587500ZS;BnaA02G0159800ZS;BnaA03G0230100ZS;BnaA03G0443200ZS;Bna…	K00276+K00276+K00276+K00276+K00276+K00276+K00815+K00815+K00815+K00815+K00815+K00815+K00815+K00815+K00815+K00815+K00815+K08081+K08081+K08081+K08081+K08081+K08081+K08081+K08081+K08081+K08081+K08081+K08081+K08081+K08081+K08081+K08081+K08081+K08081+K08081+K08081+K08081+K08081+K08081+K08081+K08081+K08081+K08081+K08081+K14454+K14454+K14454+K14454+K14454+K14454+K14454+K14455+K15849+K15849	https:\\www.genome.jp\dbget-bin\www_bget?map00960
Fatty acid degradation	ko00071	67 out of 5970 1.12227805695142%	277 out of 32833 0.843663387445558%	0.00717591	0.997452	BnaC08G0450700ZS;BnaA02G0383900ZS;BnaA09G0597200ZS;BnaA01G0121600ZS;BnaA07G0122900ZS;BnaA09G0461800ZS;BnaC07G0180700ZS;BnaC08G0284400ZS;BnaA01G0023600ZS;BnaA01G0039400ZS;BnaA03G0554200ZS;BnaA05G0389400ZS;BnaA06G0170700ZS;BnaA08G0182200ZS;BnaA08G0235200ZS;BnaC01G0027700ZS;BnaC01G0045100ZS;BnaC03G0694900ZS;BnaC05G0208700ZS;BnaC07G0530700ZS;BnaC03G0198000ZS;BnaC09G0250500ZS;BnaA09G0047500ZS;BnaC09G0…	K00001+K00001+K00001+K00121+K00121+K00121+K00121+K00128+K00128+K00128+K00128+K00128+K00128+K00128+K00128+K00128+K00128+K00128+K00128+K00128+K00232+K00626+K00626+K01897+K01897+K01897+K01897+K01897+K01897+K01897+K01897+K01897+K01897+K07517+K07517+K10527+K10527+K14085+K14085+K14085+K14085+K14085+K14085+K14085+K14085+K14085+K14085+K14085+K14085+K14085+K14085+K14085+K14085+K14085+K14085+K14085+K14085+…	https:\\www.genome.jp\dbget-bin\www_bget?map00071
Nicotinate and nicotinamide metabolism	ko00760	35 out of 5970 0.586264656616415%	130 out of 32833 0.395943106021381%	0.00877679	1	BnaA05G0347100ZS;BnaA06G0153700ZS;BnaC05G0187100ZS;BnaA07G0247600ZS;BnaC09G0476100ZS;BnaA10G0184800ZS;BnaC04G0102100ZS;BnaC08G0018600ZS;BnaC08G0352200ZS;BnaC08G0406900ZS;BnaA01G0076300ZS;BnaA01G0076400ZS;BnaA03G0511800ZS;BnaA05G0015100ZS;BnaA07G0217300ZS;BnaA08G0287300ZS;BnaA09G0510700ZS;BnaC01G0091800ZS;BnaC01G0091900ZS;BnaC03G0778100ZS;BnaC04G0015500ZS;novel.4159;novel.8160;BnaA07G0278100ZS;Bna…	K00858+K00858+K00858+K01081+K01240+K01240+K01240+K01240+K01513+K01513+K01513+K01513+K01513+K01513+K01513+K01513+K01513+K01513+K01513+K01513+K01513+K01513+K01513+K03517+K03517+K03517+K03517+K03787+K03787+K03787+K03787+K11414+K11414+K18551+K18551	https:\\www.genome.jp\dbget-bin\www_bget?map00760
Glycosphingolipid biosynthesis - ganglio series	ko00604	40 out of 5970 0.670016750418761%	153 out of 32833 0.465994578625164%	0.00908112	1	BnaC08G0376700ZS;BnaC09G0098400ZS;BnaC09G0255600ZS;BnaC09G0256500ZS;BnaC09G0256600ZS;BnaC09G0444300ZS;BnaA01G0233800ZS;BnaA01G0357700ZS;BnaA02G0095900ZS;BnaA02G0121300ZS;BnaA02G0286300ZS;BnaA02G0320500ZS;BnaA03G0009200ZS;BnaA03G0232200ZS;BnaA05G0413000ZS;BnaA06G0049200ZS;BnaA06G0289000ZS;BnaA06G0404500ZS;BnaA07G0257500ZS;BnaA07G0276600ZS;BnaA09G0219500ZS;BnaA09G0220700ZS;BnaA09G0434700ZS;BnaA09G0…	K12309+K12309+K12309+K12309+K12309+K12309+K12309+K12309+K12309+K12309+K12309+K12309+K12309+K12309+K12309+K12309+K12309+K12309+K12309+K12309+K12309+K12309+K12309+K12309+K12309+K12309+K12309+K12309+K12309+K12309+K12309+K12309+K12309+K12309+K12309+K12309+K12309+K12309+K12373+K12373	https:\\www.genome.jp\dbget-bin\www_bget?map00604
Peroxisome	ko04146	98 out of 5970 1.64154103852596%	435 out of 32833 1.32488654707154%	0.0121171	1	novel.9441;BnaC03G0198000ZS;BnaA04G0163200ZS;BnaC04G0458700ZS;BnaC09G0104800ZS;BnaA03G0390800ZS;BnaA09G0104000ZS;BnaC03G0483800ZS;BnaC02G0498100ZS;BnaA05G0351700ZS;BnaC09G0149500ZS;BnaA04G0054300ZS;BnaA04G0297500ZS;BnaA05G0006100ZS;BnaA05G0470300ZS;BnaA06G0348800ZS;BnaC04G0007500ZS;BnaC04G0356100ZS;BnaC04G0614600ZS;BnaC05G0531100ZS;BnaC08G0260800ZS;Bnascaffold0025G0038400ZS;BnaA01G0032600ZS;BnaA0…	K00106+K00232+K00306+K00306+K00830+K00830+K00830+K00830+K00869+K01578+K01897+K01897+K01897+K01897+K01897+K01897+K01897+K01897+K01897+K01897+K03781+K03781+K03781+K03781+K03781+K03781+K03781+K03781+K03781+K03781+K03781+K03781+K03781+K04564+K04564+K04564+K04564+K04564+K04564+K04564+K04564+K04564+K04565+K04565+K04565+K05677+K05677+K08726+K08726+K08726+K08726+K11147+K11147+K11517+K11517+K11517+K11517+…	https:\\www.genome.jp\dbget-bin\www_bget?map04146
Betalain biosynthesis	ko00965	28 out of 5970 0.469011725293132%	104 out of 32833 0.316754484817105%	0.017648	1	BnaA07G0003700ZS;BnaC04G0403200ZS;BnaC08G0160800ZS;BnaC08G0491200ZS;BnaC09G0028700ZS;BnaC09G0088200ZS;BnaC09G0120400ZS;BnaC09G0511400ZS;BnaA04G0110100ZS;BnaA05G0149300ZS;BnaA06G0303300ZS;BnaA06G0374500ZS;BnaA07G0250600ZS;BnaA07G0347300ZS;BnaA08G0092200ZS;BnaA08G0174700ZS;BnaA09G0043100ZS;BnaA09G0116600ZS;BnaA09G0631700ZS;BnaA09G0633400ZS;BnaA10G0210600ZS;BnaC04G0393500ZS;BnaC06G0145500ZS;BnaC06G0…	K01593+K01593+K15777+K15777+K15777+K15777+K15777+K15777+K15777+K15777+K15777+K15777+K15777+K15777+K15777+K15777+K15777+K15777+K15777+K15777+K15777+K15777+K15777+K15777+K15777+K15777+K15777+K15777	https:\\www.genome.jp\dbget-bin\www_bget?map00965
Other glycan degradation	ko00511	68 out of 5970 1.13902847571189%	295 out of 32833 0.898486279048518%	0.019981	1	BnaA08G0268100ZS;BnaA09G0101600ZS;BnaC09G0517700ZS;BnaA02G0169200ZS;BnaA05G0476800ZS;BnaA06G0008400ZS;BnaA06G0264600ZS;BnaA07G0093500ZS;BnaA07G0093700ZS;BnaA08G0211800ZS;BnaA09G0421600ZS;BnaC02G0466700ZS;BnaC03G0570600ZS;BnaC03G0653600ZS;BnaC03G0653700ZS;BnaC05G0538100ZS;BnaC07G0142700ZS;BnaC07G0142900ZS;BnaC07G0143000ZS;BnaC07G0143100ZS;BnaC01G0468800ZS;BnaC01G0469100ZS;BnaC08G0376700ZS;BnaC09G0…	K01191+K01191+K01206+K01206+K01206+K01206+K01206+K01206+K01206+K01206+K01206+K01206+K01206+K01206+K01206+K01206+K01206+K01206+K01206+K01206+K01227+K01227+K12309+K12309+K12309+K12309+K12309+K12309+K12309+K12309+K12309+K12309+K12309+K12309+K12309+K12309+K12309+K12309+K12309+K12309+K12309+K12309+K12309+K12309+K12309+K12309+K12309+K12309+K12309+K12309+K12309+K12309+K12309+K12309+K12309+K12309+K12309+…	https:\\www.genome.jp\dbget-bin\www_bget?map00511
Folate biosynthesis	ko00790	33 out of 5970 0.552763819095477%	129 out of 32833 0.392897389821216%	0.0225931	1	BnaA09G0544400ZS;BnaC09G0211300ZS;BnaA02G0362800ZS;BnaA05G0459900ZS;BnaC01G0492400ZS;BnaC02G0487400ZS;BnaA01G0371800ZS;BnaA05G0430900ZS;BnaC05G0484100ZS;BnaA03G0141300ZS;BnaC03G0163600ZS;BnaC08G0355900ZS;BnaA01G0381300ZS;BnaA09G0513800ZS;BnaC03G0026600ZS;BnaA03G0241400ZS;BnaC03G0285500ZS;BnaC08G0444700ZS;BnaA02G0103000ZS;BnaA09G0087700ZS;BnaA09G0592700ZS;BnaC02G0124900ZS;BnaC09G0227700ZS;BnaC09G0…	K00079+K01113+K01495+K01495+K01495+K01495+K01633+K01633+K01633+K01724+K01724+K01930+K01930+K01930+K01930+K13998+K13998+K14652+K14652+K14652+K14652+K14652+K15631+K15631+K15631+K15631+K15631+K15631+K15631+K15631+K15631+K15631+K18482	https:\\www.genome.jp\dbget-bin\www_bget?map00790
Sulfur metabolism	ko00920	44 out of 5970 0.737018425460637%	182 out of 32833 0.554320348429933%	0.0253949	1	BnaC08G0398300ZS;BnaC09G0399100ZS;BnaA05G0420600ZS;BnaC03G0816400ZS;BnaC05G0472600ZS;BnaA05G0106900ZS;BnaA01G0008600ZS;BnaA03G0393500ZS;BnaA03G0567200ZS;BnaA08G0192300ZS;BnaA09G0105100ZS;BnaC01G0010100ZS;BnaC03G0487200ZS;BnaC07G0541600ZS;BnaA06G0110900ZS;BnaC09G0272600ZS;BnaA09G0232500ZS;BnaC09G0041800ZS;BnaA02G0370200ZS;BnaA04G0278900ZS;BnaA09G0054800ZS;BnaC02G0496100ZS;BnaC04G0597000ZS;BnaC05G0…	K00640+K00640+K00640+K00640+K00640+K00641+K00860+K00860+K00860+K00860+K00860+K00860+K00860+K00860+K01011+K01082+K01082+K01738+K01738+K01738+K01738+K01738+K01738+K01738+K01739+K05907+K05907+K05907+K05907+K05907+K05907+K05907+K13811+K13811+K13811+K13811+K15422+K17285+K17285+K17285+K17285+K17285+K17725+K17725	https:\\www.genome.jp\dbget-bin\www_bget?map00920
Limonene and pinene degradation	ko00903	13 out of 5970 0.217755443886097%	41 out of 32833 0.124874364206743%	0.0259689	1	BnaC08G0284400ZS;BnaA01G0023600ZS;BnaA01G0039400ZS;BnaA03G0554200ZS;BnaA05G0389400ZS;BnaA06G0170700ZS;BnaA08G0182200ZS;BnaA08G0235200ZS;BnaC01G0027700ZS;BnaC01G0045100ZS;BnaC03G0694900ZS;BnaC05G0208700ZS;BnaC07G0530700ZS	K00128+K00128+K00128+K00128+K00128+K00128+K00128+K00128+K00128+K00128+K00128+K00128+K00128	https:\\www.genome.jp\dbget-bin\www_bget?map00903
Pentose and glucuronate interconversions	ko00040	201 out of 5970 3.36683417085427%	979 out of 32833 2.98175615996101%	0.0306267	1	BnaC03G0003500ZS;BnaC09G0341100ZS;BnaA10G0089600ZS;BnaC08G0019700ZS;BnaC08G0019800ZS;novel.7968;novel.2400;BnaA03G0073600ZS;BnaC03G0083900ZS;BnaC04G0517800ZS;novel.5952;BnaC08G0231500ZS;BnaC08G0416300ZS;BnaC08G0512700ZS;BnaC09G0069900ZS;BnaC09G0168000ZS;BnaC09G0254700ZS;BnaC09G0285100ZS;BnaC09G0457900ZS;BnaC09G0560600ZS;BnaC09G0596400ZS;BnaC09G0609200ZS;BnaA01G0354000ZS;BnaA01G0354100ZS;BnaA01G03…	K00002+K00008+K00008+K00008+K00008+K00078+K00078+K00963+K00963+K00963+K00963+K01051+K01051+K01051+K01051+K01051+K01051+K01051+K01051+K01051+K01051+K01051+K01051+K01051+K01051+K01051+K01051+K01051+K01051+K01051+K01051+K01051+K01051+K01051+K01051+K01051+K01051+K01051+K01051+K01051+K01051+K01051+K01051+K01051+K01051+K01051+K01051+K01051+K01051+K01051+K01051+K01051+K01051+K01051+K01051+K01051+K01051+…	https:\\www.genome.jp\dbget-bin\www_bget?map00040
alpha-Linolenic acid metabolism	ko00592	56 out of 5970 0.938023450586265%	250 out of 32833 0.761429050041117%	0.0519028	1	BnaA08G0056800ZS;BnaC08G0079500ZS;BnaC03G0198000ZS;BnaC06G0315600ZS;BnaC06G0315700ZS;novel.8166;novel.8240;novel.3080;novel.3126;BnaA01G0019000ZS;BnaC01G0021900ZS;BnaC08G0471000ZS;BnaA09G0615500ZS;BnaC07G0201300ZS;BnaC09G0267300ZS;BnaC09G0267600ZS;BnaA09G0228100ZS;BnaC08G0260200ZS;BnaC08G0260600ZS;BnaA06G0144100ZS;BnaA06G0144200ZS;BnaA07G0133300ZS;BnaA07G0133400ZS;BnaC05G0174800ZS;BnaC07G0194600Z…	K00224+K00224+K00232+K00454+K00454+K00454+K00454+K00454+K00454+K01723+K01723+K05894+K05894+K08241+K10525+K10525+K10525+K10526+K10526+K10526+K10526+K10526+K10526+K10526+K10526+K10527+K10527+K10528+K10528+K10529+K10529+K10529+K10529+K10529+K10529+K10529+K10529+K14674+K16818+K16818+K16818+K16818+K16818+K16818+K16818+K16818+K16818+K16818+K16818+K16818+K16818+K16818+K18857+K18857+K18858+K18858	https:\\www.genome.jp\dbget-bin\www_bget?map00592
Isoflavonoid biosynthesis	ko00943	17 out of 5970 0.284757118927973%	63 out of 32833 0.191880120610362%	0.0545412	1	BnaC08G0251700ZS;BnaA05G0180200ZS;BnaA06G0133400ZS;BnaA06G0266100ZS;BnaA06G0396700ZS;BnaA08G0030000ZS;BnaA08G0044700ZS;BnaA08G0252800ZS;BnaA09G0610200ZS;BnaC01G0283100ZS;BnaC05G0160900ZS;BnaA07G0141100ZS;BnaA07G0141200ZS;BnaA07G0141300ZS;BnaC04G0457900ZS;BnaC07G0205200ZS;BnaA09G0457500ZS	K13258+K13258+K13258+K13258+K13258+K13258+K13258+K13258+K13258+K13258+K13258+K13260+K13260+K13260+K13260+K13260+K25075	https:\\www.genome.jp\dbget-bin\www_bget?map00943
Biosynthesis of cofactors	ko01240	260 out of 5970 4.35510887772194%	1308 out of 32833 3.98379678981513%	0.057637	1	BnaC03G0003500ZS;BnaA08G0289300ZS;BnaA10G0189700ZS;BnaC05G0554900ZS;BnaA05G0011700ZS;BnaA05G0011800ZS;BnaA05G0011900ZS;BnaC04G0012200ZS;BnaC04G0012300ZS;BnaC04G0012400ZS;novel.5240;novel.5591;BnaC08G0284400ZS;BnaA01G0023600ZS;BnaA01G0039400ZS;BnaA03G0554200ZS;BnaA05G0389400ZS;BnaA06G0170700ZS;BnaA08G0182200ZS;BnaA08G0235200ZS;BnaC01G0027700ZS;BnaC01G0045100ZS;BnaC03G0694900ZS;BnaC05G0208700ZS;Bna…	K00002+K00059+K00059+K00059+K00103+K00103+K00103+K00103+K00103+K00103+K00103+K00103+K00128+K00128+K00128+K00128+K00128+K00128+K00128+K00128+K00128+K00128+K00128+K00128+K00128+K00225+K00228+K00228+K00228+K00231+K00231+K00231+K00231+K00275+K00275+K00275+K00288+K00382+K00382+K00382+K00457+K00457+K00600+K00600+K00600+K00600+K00600+K00600+K00600+K00789+K00789+K00793+K00826+K00826+K00826+K00826+K00826+…	https:\\www.genome.jp\dbget-bin\www_bget?map01240
Phenylalanine metabolism	ko00360	52 out of 5970 0.871021775544389%	233 out of 32833 0.709651874638321%	0.0624522	1	BnaA04G0296800ZS;BnaA08G0083500ZS;BnaA08G0083600ZS;BnaC01G0252100ZS;BnaC02G0357300ZS;BnaC04G0613900ZS;BnaA10G0046800ZS;BnaC05G0047700ZS;BnaC08G0458300ZS;BnaA03G0238000ZS;BnaA03G0473600ZS;BnaA03G0504500ZS;BnaA05G0144400ZS;BnaA09G0604200ZS;BnaC06G0001700ZS;BnaC06G0151600ZS;BnaC07G0451900ZS;novel.1470;novel.8853;BnaC08G0528200ZS;BnaA01G0034100ZS;BnaA02G0307900ZS;BnaA09G0663700ZS;BnaC06G0030900ZS;Bna…	K00276+K00276+K00276+K00276+K00276+K00276+K00457+K00457+K00815+K00815+K00815+K00815+K00815+K00815+K00815+K00815+K00815+K00815+K00815+K01426+K01426+K01426+K01426+K01426+K01593+K01593+K07253+K07253+K07253+K07253+K10775+K10775+K10775+K10775+K10775+K10775+K10775+K10775+K10775+K10775+K10775+K10775+K14454+K14454+K14454+K14454+K14454+K14454+K14454+K14455+K15849+K15849	https:\\www.genome.jp\dbget-bin\www_bget?map00360
2-Oxocarboxylic acid metabolism	ko01210	75 out of 5970 1.25628140703518%	349 out of 32833 1.0629549538574%	0.0639262	1	BnaA02G0242400ZS;BnaA06G0013000ZS;BnaC06G0076400ZS;BnaC06G0080600ZS;BnaA06G0098000ZS;novel.8622;novel.6774;BnaA07G0387600ZS;BnaC06G0455600ZS;BnaC08G0199000ZS;BnaC08G0298700ZS;BnaA02G0158700ZS;BnaA06G0032400ZS;BnaA06G0063200ZS;BnaA08G0290800ZS;BnaC05G0078800ZS;BnaC02G0163200ZS;BnaC08G0384900ZS;BnaA05G0033900ZS;BnaC02G0072400ZS;BnaC04G0036600ZS;BnaC04G0289100ZS;BnaC08G0469100ZS;BnaA02G0063700ZS;Bna…	K00052+K00053+K00053+K00053+K00133+K00620+K00814+K00818+K00818+K00826+K00826+K00826+K00826+K00826+K00826+K00826+K00928+K01647+K01647+K01647+K01647+K01647+K01649+K01653+K01653+K01653+K11812+K11812+K11812+K11812+K11812+K11813+K11813+K11819+K11819+K11819+K11820+K11820+K11821+K12154+K12154+K12156+K12156+K12156+K12156+K14272+K14272+K14272+K14272+K14272+K14272+K14272+K14454+K14454+K14454+K14454+K14454+…	https:\\www.genome.jp\dbget-bin\www_bget?map01210
Glycerophospholipid metabolism	ko00564	128 out of 5970 2.14405360134003%	622 out of 32833 1.8944354765023%	0.0669574	1	BnaA04G0259700ZS;BnaA05G0025400ZS;BnaC04G0027000ZS;BnaC04G0576800ZS;BnaA01G0380700ZS;BnaA05G0326300ZS;BnaA08G0075600ZS;BnaC05G0343500ZS;BnaC08G0107200ZS;BnaC08G0208800ZS;BnaA04G0215000ZS;BnaA05G0108000ZS;BnaA06G0073900ZS;BnaA07G0258700ZS;BnaA07G0333800ZS;BnaA08G0284200ZS;BnaC04G0135100ZS;BnaC04G0526200ZS;BnaC05G0091500ZS;BnaC06G0288800ZS;BnaC07G0498300ZS;BnaA01G0070200ZS;BnaA03G0502500ZS;BnaA09G0…	K00006+K00006+K00006+K00006+K00111+K00630+K00630+K00630+K00630+K00655+K00655+K00655+K00655+K00655+K00655+K00655+K00655+K00655+K00655+K00655+K00655+K00901+K00901+K00901+K00901+K00968+K00968+K00968+K00981+K00981+K00981+K00981+K00993+K00993+K00993+K00993+K00993+K00993+K00993+K00993+K00995+K01094+K01094+K01114+K01114+K01114+K01114+K01115+K01115+K01115+K01115+K01126+K01126+K01126+K01126+K01126+K01126+…	https:\\www.genome.jp\dbget-bin\www_bget?map00564
Ascorbate and aldarate metabolism	ko00053	91 out of 5970 1.52428810720268%	436 out of 32833 1.32793226327171%	0.0820513	1	BnaC03G0003500ZS;BnaA05G0011700ZS;BnaA05G0011800ZS;BnaA05G0011900ZS;BnaC04G0012200ZS;BnaC04G0012300ZS;BnaC04G0012400ZS;novel.5240;novel.5591;BnaC08G0284400ZS;BnaA01G0023600ZS;BnaA01G0039400ZS;BnaA03G0554200ZS;BnaA05G0389400ZS;BnaA06G0170700ZS;BnaA08G0182200ZS;BnaA08G0235200ZS;BnaC01G0027700ZS;BnaC01G0045100ZS;BnaC03G0694900ZS;BnaC05G0208700ZS;BnaC07G0530700ZS;BnaC03G0574800ZS;BnaA01G0148000ZS;Bna…	K00002+K00103+K00103+K00103+K00103+K00103+K00103+K00103+K00103+K00128+K00128+K00128+K00128+K00128+K00128+K00128+K00128+K00128+K00128+K00128+K00128+K00128+K00225+K00423+K00423+K00423+K00423+K00423+K00423+K00423+K00434+K00434+K00434+K00434+K00434+K00434+K00434+K00434+K00434+K00434+K00469+K00469+K00469+K08232+K08232+K08232+K08679+K10046+K10046+K12447+K12447+K12447+K12447+K12447+K14085+K14085+K14085+…	https:\\www.genome.jp\dbget-bin\www_bget?map00053
Galactose metabolism	ko00052	115 out of 5970 1.92629815745394%	562 out of 32833 1.71169250449243%	0.088607	1	BnaA10G0056100ZS;BnaC06G0022700ZS;novel.9541;BnaA01G0050200ZS;BnaA01G0157600ZS;BnaA02G0026300ZS;BnaA06G0138600ZS;BnaA06G0138900ZS;BnaA08G0214700ZS;BnaA09G0492500ZS;BnaC01G0058900ZS;BnaC01G0096300ZS;BnaC01G0200700ZS;BnaC03G0203900ZS;BnaC03G0649900ZS;BnaC04G0132600ZS;BnaC05G0167300ZS;BnaC05G0167600ZS;BnaC05G0268500ZS;BnaC05G0268800ZS;BnaC07G0383400ZS;novel.7275;BnaA03G0073600ZS;BnaC03G0083900ZS;Bna…	K00844+K00844+K00844+K00850+K00850+K00850+K00850+K00850+K00850+K00850+K00850+K00850+K00850+K00850+K00850+K00850+K00850+K00850+K00850+K00850+K00850+K00850+K00963+K00963+K00963+K00963+K01193+K01193+K01193+K01193+K01193+K01193+K01193+K01193+K01193+K01193+K01193+K01193+K01193+K01193+K01193+K01193+K01193+K01193+K01193+K01193+K01193+K01784+K01784+K01784+K01784+K01784+K01784+K01785+K01785+K01785+K01785+…	https:\\www.genome.jp\dbget-bin\www_bget?map00052
Arginine and proline metabolism	ko00330	86 out of 5970 1.44053601340034%	415 out of 32833 1.26397222306825%	0.100587	1	BnaC08G0284400ZS;BnaA01G0023600ZS;BnaA01G0039400ZS;BnaA03G0554200ZS;BnaA05G0389400ZS;BnaA06G0170700ZS;BnaA08G0182200ZS;BnaA08G0235200ZS;BnaC01G0027700ZS;BnaC01G0045100ZS;BnaC03G0694900ZS;BnaC05G0208700ZS;BnaC07G0530700ZS;BnaA06G0368500ZS;BnaC04G0377900ZS;BnaA02G0076400ZS;BnaA03G0302900ZS;BnaC02G0090100ZS;BnaC03G0363000ZS;novel.3470;BnaC07G0171800ZS;BnaC08G0528200ZS;BnaA01G0034100ZS;BnaA02G0307900…	K00128+K00128+K00128+K00128+K00128+K00128+K00128+K00128+K00128+K00128+K00128+K00128+K00128+K00318+K00318+K00472+K00472+K00472+K00472+K00472+K00797+K01426+K01426+K01426+K01426+K01426+K01583+K01583+K01583+K01611+K10536+K10536+K10536+K10536+K12259+K12259+K12259+K12657+K13427+K13427+K13427+K13427+K14085+K14085+K14085+K14085+K14085+K14085+K14085+K14085+K14085+K14085+K14085+K14085+K14085+K14085+K14085+…	https:\\www.genome.jp\dbget-bin\www_bget?map00330
Valine, leucine and isoleucine degradation	ko00280	71 out of 5970 1.1892797319933%	340 out of 32833 1.03554350805592%	0.111234	1	BnaA10G0249100ZS;BnaC03G0533400ZS;BnaC08G0284400ZS;BnaA01G0023600ZS;BnaA01G0039400ZS;BnaA03G0554200ZS;BnaA05G0389400ZS;BnaA06G0170700ZS;BnaA08G0182200ZS;BnaA08G0235200ZS;BnaC01G0027700ZS;BnaC01G0045100ZS;BnaC03G0694900ZS;BnaC05G0208700ZS;BnaC07G0530700ZS;BnaC05G0184400ZS;BnaA06G0043400ZS;BnaC03G0419600ZS;BnaC06G0024800ZS;BnaC09G0250500ZS;BnaA09G0047500ZS;BnaC08G0199000ZS;BnaC08G0298700ZS;BnaA02G0…	K00020+K00020+K00128+K00128+K00128+K00128+K00128+K00128+K00128+K00128+K00128+K00128+K00128+K00128+K00128+K00166+K00382+K00382+K00382+K00626+K00626+K00826+K00826+K00826+K00826+K00826+K00826+K00826+K00827+K00827+K00827+K00827+K00827+K00827+K01641+K01968+K01968+K01968+K01968+K01968+K01968+K01968+K01968+K05605+K05605+K05605+K05605+K05605+K05605+K05605+K14085+K14085+K14085+K14085+K14085+K14085+K14085+…	https:\\www.genome.jp\dbget-bin\www_bget?map00280
Flavone and flavonol biosynthesis	ko00944	4 out of 5970 0.067001675041876%	11 out of 32833 0.0335028782018092%	0.123245	1	BnaC09G0570900ZS;BnaA10G0256900ZS;BnaA02G0067600ZS;BnaC02G0077700ZS	K05280+K05280+K10757+K10757	https:\\www.genome.jp\dbget-bin\www_bget?map00944
Steroid biosynthesis	ko00100	36 out of 5970 0.603015075376884%	166 out of 32833 0.505588889227302%	0.142245	1	BnaC09G0058800ZS;BnaC09G0059100ZS;BnaA01G0012500ZS;BnaA02G0387500ZS;BnaA04G0056500ZS;BnaA06G0326600ZS;BnaA06G0326700ZS;BnaA09G0068700ZS;BnaC01G0014800ZS;BnaC02G0518900ZS;BnaC04G0353700ZS;BnaC07G0367400ZS;BnaC04G0579600ZS;BnaC07G0522300ZS;BnaA07G0043100ZS;BnaA10G0216500ZS;BnaA07G0135900ZS;BnaC07G0197900ZS;BnaA07G0077200ZS;BnaA02G0230400ZS;BnaC02G0310700ZS;BnaC08G0429300ZS;BnaA09G0577700ZS;BnaC03G0…	K00511+K00511+K00511+K00511+K00511+K00511+K00511+K00511+K00511+K00511+K00511+K00511+K00559+K00801+K01052+K01052+K01824+K01824+K01853+K08242+K08242+K08246+K08246+K08246+K09828+K09828+K09828+K09828+K09832+K09832+K14423+K14424+K14424+K14674+K23558+K23558	https:\\www.genome.jp\dbget-bin\www_bget?map00100
beta-Alanine metabolism	ko00410	64 out of 5970 1.07202680067002%	311 out of 32833 0.94721773825115%	0.152357	1	BnaC08G0284400ZS;BnaA01G0023600ZS;BnaA01G0039400ZS;BnaA03G0554200ZS;BnaA05G0389400ZS;BnaA06G0170700ZS;BnaA08G0182200ZS;BnaA08G0235200ZS;BnaC01G0027700ZS;BnaC01G0045100ZS;BnaC03G0694900ZS;BnaC05G0208700ZS;BnaC07G0530700ZS;BnaC03G0198000ZS;BnaA04G0296800ZS;BnaA08G0083500ZS;BnaA08G0083600ZS;BnaC01G0252100ZS;BnaC02G0357300ZS;BnaC04G0613900ZS;BnaA09G0087900ZS;BnaA05G0351700ZS;BnaC09G0256000ZS;BnaC09G0…	K00128+K00128+K00128+K00128+K00128+K00128+K00128+K00128+K00128+K00128+K00128+K00128+K00128+K00232+K00276+K00276+K00276+K00276+K00276+K00276+K01431+K01578+K01580+K01580+K01580+K01580+K01580+K01580+K01580+K01580+K01580+K05605+K05605+K05605+K05605+K05605+K05605+K05605+K12259+K12259+K12259+K14085+K14085+K14085+K14085+K14085+K14085+K14085+K14085+K14085+K14085+K14085+K14085+K14085+K14085+K14085+K14085+…	https:\\www.genome.jp\dbget-bin\www_bget?map00410
Pantothenate and CoA biosynthesis	ko00770	46 out of 5970 0.770519262981575%	221 out of 32833 0.673103280236348%	0.175408	1	BnaA06G0013000ZS;BnaC06G0076400ZS;BnaC06G0080600ZS;BnaC08G0284400ZS;BnaA01G0023600ZS;BnaA01G0039400ZS;BnaA03G0554200ZS;BnaA05G0389400ZS;BnaA06G0170700ZS;BnaA08G0182200ZS;BnaA08G0235200ZS;BnaC01G0027700ZS;BnaC01G0045100ZS;BnaC03G0694900ZS;BnaC05G0208700ZS;BnaC07G0530700ZS;BnaC08G0199000ZS;BnaC08G0298700ZS;BnaA02G0158700ZS;BnaA06G0032400ZS;BnaA06G0063200ZS;BnaA08G0290800ZS;BnaC05G0078800ZS;BnaA09G0…	K00053+K00053+K00053+K00128+K00128+K00128+K00128+K00128+K00128+K00128+K00128+K00128+K00128+K00128+K00128+K00128+K00826+K00826+K00826+K00826+K00826+K00826+K00826+K01431+K01513+K01513+K01513+K01513+K01513+K01513+K01513+K01513+K01513+K01513+K01513+K01513+K01513+K01513+K01513+K01598+K01653+K01653+K01653+K02201+K17839+K17839	https:\\www.genome.jp\dbget-bin\www_bget?map00770
Tyrosine metabolism	ko00350	47 out of 5970 0.787269681742044%	229 out of 32833 0.697469009837663%	0.200082	1	BnaC08G0450700ZS;BnaA02G0383900ZS;BnaA09G0597200ZS;BnaA01G0121600ZS;BnaA07G0122900ZS;BnaA09G0461800ZS;BnaC07G0180700ZS;BnaA04G0296800ZS;BnaA08G0083500ZS;BnaA08G0083600ZS;BnaC01G0252100ZS;BnaC02G0357300ZS;BnaC04G0613900ZS;BnaA10G0046800ZS;BnaC05G0047700ZS;BnaC08G0458300ZS;BnaA03G0238000ZS;BnaA03G0473600ZS;BnaA03G0504500ZS;BnaA05G0144400ZS;BnaA09G0604200ZS;BnaC06G0001700ZS;BnaC06G0151600ZS;BnaC07G0…	K00001+K00001+K00001+K00121+K00121+K00121+K00121+K00276+K00276+K00276+K00276+K00276+K00276+K00457+K00457+K00815+K00815+K00815+K00815+K00815+K00815+K00815+K00815+K00815+K00815+K00815+K01557+K01592+K01592+K01593+K01593+K07253+K07253+K07253+K07253+K14454+K14454+K14454+K14454+K14454+K14454+K14454+K14455+K15849+K15849+K18857+K18857	https:\\www.genome.jp\dbget-bin\www_bget?map00350
Taurine and hypotaurine metabolism	ko00430	12 out of 5970 0.201005025125628%	52 out of 32833 0.158377242408552%	0.225594	1	BnaC09G0256000ZS;BnaC09G0491600ZS;BnaA02G0320000ZS;BnaA03G0073800ZS;BnaA09G0220100ZS;BnaA10G0195700ZS;BnaC02G0431900ZS;BnaC03G0084100ZS;BnaC06G0326100ZS;BnaA03G0510200ZS;BnaC01G0007400ZS;BnaC07G0488400ZS	K01580+K01580+K01580+K01580+K01580+K01580+K01580+K01580+K01580+K18592+K18592+K18592	https:\\www.genome.jp\dbget-bin\www_bget?map00430
Polyketide sugar unit biosynthesis	ko00523	2 out of 5970 0.033500837520938%	5 out of 32833 0.0152285810008223%	0.225979	1	BnaA06G0081600ZS;BnaC05G0100900ZS	K12451+K12451	https:\\www.genome.jp\dbget-bin\www_bget?map00523
Indole alkaloid biosynthesis	ko00901	19 out of 5970 0.318257956448911%	88 out of 32833 0.268023025614473%	0.239845	1	BnaA07G0003700ZS;BnaC04G0403200ZS;BnaC09G0451700ZS;BnaA01G0207300ZS;BnaA02G0209200ZS;BnaA04G0020700ZS;BnaA04G0031900ZS;BnaA04G0032300ZS;BnaA07G0343200ZS;BnaA10G0167500ZS;BnaC01G0260400ZS;BnaC02G0279900ZS;BnaC03G0238400ZS;BnaC04G0025400ZS;BnaC04G0303100ZS;BnaC04G0303200ZS;BnaC04G0303700ZS;BnaC04G0476800ZS;BnaC06G0403500ZS	K01593+K01593+K01757+K01757+K01757+K01757+K01757+K01757+K01757+K01757+K01757+K01757+K01757+K01757+K01757+K01757+K01757+K01757+K01757	https:\\www.genome.jp\dbget-bin\www_bget?map00901
Butanoate metabolism	ko00650	24 out of 5970 0.402010050251256%	117 out of 32833 0.356348795419243%	0.290356	1	BnaC08G0366500ZS;BnaC09G0250500ZS;BnaA09G0047500ZS;BnaC09G0256000ZS;BnaC09G0491600ZS;BnaA02G0320000ZS;BnaA03G0073800ZS;BnaA09G0220100ZS;BnaA10G0195700ZS;BnaC02G0431900ZS;BnaC03G0084100ZS;BnaC06G0326100ZS;BnaA09G0245900ZS;BnaA02G0063700ZS;BnaA03G0154100ZS;novel.7233;BnaA07G0027200ZS;BnaC07G0051400ZS;BnaA05G0338300ZS;BnaC05G0361300ZS;BnaA07G0382700ZS;BnaA06G0121200ZS;BnaA07G0065900ZS;BnaC05G0149200…	K00109+K00626+K00626+K01580+K01580+K01580+K01580+K01580+K01580+K01580+K01580+K01580+K01641+K01653+K01653+K01653+K01913+K01913+K16871+K16871+K17761+K18121+K18121+K18121	https:\\www.genome.jp\dbget-bin\www_bget?map00650
Diterpenoid biosynthesis	ko00904	26 out of 5970 0.435510887772194%	128 out of 32833 0.389851673621052%	0.298503	1	BnaC09G0013100ZS;BnaA09G0028500ZS;BnaA07G0382800ZS;BnaC06G0450200ZS;BnaA05G0117300ZS;BnaA02G0150000ZS;BnaA06G0105000ZS;BnaC02G0192400ZS;BnaC05G0130100ZS;BnaA01G0114200ZS;BnaA01G0375200ZS;BnaA02G0232000ZS;BnaA08G0206600ZS;BnaC01G0468400ZS;BnaC03G0661800ZS;novel.9448;BnaC09G0574300ZS;BnaA01G0149400ZS;BnaA02G0024900ZS;BnaA02G0244700ZS;BnaA10G0260100ZS;BnaC02G0328200ZS;BnaA05G0007100ZS;BnaC02G0455700…	K04120+K04120+K04121+K04121+K04123+K04124+K04124+K04124+K04124+K04125+K04125+K04125+K04125+K04125+K04125+K04125+K05282+K05282+K05282+K05282+K05282+K05282+K13070+K13070+K13070+K17961	https:\\www.genome.jp\dbget-bin\www_bget?map00904
Brassinosteroid biosynthesis	ko00905	10 out of 5970 0.16750418760469%	46 out of 32833 0.140102945207566%	0.320287	1	BnaA09G0472400ZS;BnaA10G0273600ZS;BnaC09G0503900ZS;BnaA03G0066200ZS;BnaA10G0204900ZS;BnaA01G0357900ZS;BnaC01G0445000ZS;BnaA02G0356800ZS;BnaA06G0369900ZS;BnaC07G0322400ZS	K09587+K09588+K09591+K09591+K09591+K12638+K12638+K12640+K12640+K12640	https:\\www.genome.jp\dbget-bin\www_bget?map00905
Phosphonate and phosphinate metabolism	ko00440	11 out of 5970 0.184254606365159%	52 out of 32833 0.158377242408552%	0.341538	1	BnaA01G0198600ZS;BnaC01G0250800ZS;BnaC06G0145400ZS;BnaC08G0224200ZS;BnaC08G0497500ZS;BnaC08G0497700ZS;BnaA02G0331600ZS;BnaA08G0274600ZS;BnaA09G0640300ZS;BnaC02G0446700ZS;BnaC07G0288600ZS	K00968+K00968+K00968+K00993+K00993+K00993+K00993+K00993+K00993+K00993+K00993	https:\\www.genome.jp\dbget-bin\www_bget?map00440
Cysteine and methionine metabolism	ko00270	112 out of 5970 1.87604690117253%	594 out of 32833 1.80915542289769%	0.35034	1	BnaC09G0561100ZS;BnaA02G0032600ZS;BnaA10G0248000ZS;BnaC02G0036000ZS;novel.9515;BnaA01G0039900ZS;BnaA03G0358500ZS;BnaA03G0543100ZS;BnaA08G0136800ZS;BnaA08G0260300ZS;BnaC01G0045700ZS;BnaC03G0436800ZS;BnaC03G0747700ZS;BnaC07G0519100ZS;BnaA06G0098000ZS;BnaA09G0569800ZS;BnaA03G0292400ZS;BnaC03G0351200ZS;BnaC05G0549700ZS;BnaC08G0398300ZS;BnaC09G0399100ZS;BnaA05G0420600ZS;BnaC03G0816400ZS;BnaC05G0472600…	K00026+K00026+K00026+K00026+K00026+K00058+K00058+K00058+K00058+K00058+K00058+K00058+K00058+K00058+K00133+K00547+K00549+K00549+K00549+K00640+K00640+K00640+K00640+K00640+K00641+K00789+K00789+K00797+K00815+K00815+K00815+K00815+K00815+K00815+K00815+K00815+K00815+K00815+K00815+K00826+K00826+K00826+K00826+K00826+K00826+K00826+K00827+K00827+K00827+K00827+K00827+K00827+K00831+K00831+K00837+K00837+K00928+…	https:\\www.genome.jp\dbget-bin\www_bget?map00270
Glycosphingolipid biosynthesis - globo and isoglobo series	ko00603	10 out of 5970 0.16750418760469%	48 out of 32833 0.146194377607894%	0.372505	1	BnaC09G0622000ZS;BnaA10G0301100ZS;BnaC01G0453100ZS;BnaA01G0181300ZS;BnaA02G0029200ZS;BnaA02G0337300ZS;BnaC01G0231500ZS;BnaC02G0032100ZS;BnaA09G0680300ZS;BnaC06G0324200ZS	K01988+K01988+K01988+K07407+K07407+K07407+K07407+K07407+K12373+K12373	https:\\www.genome.jp\dbget-bin\www_bget?map00603
Aminoacyl-tRNA biosynthesis	ko00970	91 out of 5970 1.52428810720268%	489 out of 32833 1.48935522188043%	0.421139	1	BnaA07G0288000ZS;BnaC01G0501700ZS;BnaC03G0347300ZS;BnaC03G0650700ZS;BnaA03G0134000ZS;BnaA04G0171700ZS;BnaC03G0155700ZS;novel.9996;novel.2395;novel.2944;BnaC08G0471300ZS;BnaA03G0386100ZS;BnaC03G0478600ZS;BnaA03G0262100ZS;BnaC03G0312500ZS;BnaC08G0455600ZS;BnaA02G0003800ZS;BnaA02G0364900ZS;BnaA03G0334600ZS;BnaA03G0450400ZS;BnaA03G0465600ZS;BnaA03G0573400ZS;BnaA05G0414700ZS;BnaA06G0005800ZS;BnaA06G03…	K00604+K01866+K01866+K01866+K01867+K01867+K01867+K01867+K01867+K01867+K01868+K01868+K01868+K01869+K01869+K01870+K01870+K01870+K01870+K01870+K01870+K01870+K01870+K01870+K01870+K01870+K01870+K01870+K01870+K01870+K01870+K01870+K01870+K01870+K01870+K01870+K01870+K01872+K01872+K01872+K01872+K01872+K01872+K01872+K01872+K01872+K01872+K01872+K01872+K01872+K01873+K01873+K01875+K01875+K01876+K01881+K01881+…	https:\\www.genome.jp\dbget-bin\www_bget?map00970
Sphingolipid metabolism	ko00600	58 out of 5970 0.971524288107203%	311 out of 32833 0.94721773825115%	0.438202	1	BnaA01G0212000ZS;BnaA09G0392900ZS;BnaA09G0471600ZS;BnaC05G0282000ZS;BnaA04G0291400ZS;BnaA01G0181300ZS;BnaA02G0029200ZS;BnaA02G0337300ZS;BnaC01G0231500ZS;BnaC02G0032100ZS;BnaC08G0376700ZS;BnaC09G0098400ZS;BnaC09G0255600ZS;BnaC09G0256500ZS;BnaC09G0256600ZS;BnaC09G0444300ZS;BnaA01G0233800ZS;BnaA01G0357700ZS;BnaA02G0095900ZS;BnaA02G0121300ZS;BnaA02G0286300ZS;BnaA02G0320500ZS;BnaA03G0009200ZS;BnaA03G0…	K04708+K04708+K04708+K04708+K04715+K07407+K07407+K07407+K07407+K07407+K12309+K12309+K12309+K12309+K12309+K12309+K12309+K12309+K12309+K12309+K12309+K12309+K12309+K12309+K12309+K12309+K12309+K12309+K12309+K12309+K12309+K12309+K12309+K12309+K12309+K12309+K12309+K12309+K12309+K12309+K12309+K12309+K12309+K12309+K12309+K12309+K12309+K12309+K12349+K12349+K12349+K12382+K12382+K17108+K17108+K17108+K17108+…	https:\\www.genome.jp\dbget-bin\www_bget?map00600
One carbon pool by folate	ko00670	21 out of 5970 0.351758793969849%	111 out of 32833 0.338074498218256%	0.458583	1	BnaC03G0393200ZS;BnaA01G0011100ZS;BnaA07G0325000ZS;BnaA08G0052000ZS;BnaA08G0189700ZS;BnaC01G0013200ZS;BnaC01G0062600ZS;BnaC03G0684400ZS;BnaA07G0288000ZS;BnaC08G0212500ZS;BnaC08G0510600ZS;BnaA08G0282000ZS;BnaA09G0651400ZS;BnaC01G0338000ZS;BnaA01G0177800ZS;BnaC01G0228200ZS;BnaC07G0375300ZS;BnaA07G0242300ZS;BnaC06G0265300ZS;BnaA03G0241400ZS;BnaC03G0285500ZS	K00288+K00600+K00600+K00600+K00600+K00600+K00600+K00600+K00604+K00605+K00605+K00605+K00605+K00605+K01433+K01433+K01433+K01934+K01934+K13998+K13998	https:\\www.genome.jp\dbget-bin\www_bget?map00670
Inositol phosphate metabolism	ko00562	84 out of 5970 1.4070351758794%	458 out of 32833 1.39493801967533%	0.48417	1	BnaA07G0285200ZS;BnaC06G0327000ZS;BnaA03G0491300ZS;BnaA09G0123600ZS;BnaC07G0469700ZS;BnaC06G0052900ZS;BnaC08G0201200ZS;BnaC08G0201500ZS;BnaC08G0421800ZS;BnaA03G0124300ZS;BnaA06G0070700ZS;BnaA09G0033300ZS;BnaA03G0071100ZS;BnaA01G0354200ZS;BnaC01G0440700ZS;BnaC05G0497200ZS;BnaC05G0497300ZS;BnaA02G0250100ZS;BnaA03G0277600ZS;BnaA05G0011100ZS;BnaA06G0019800ZS;BnaA09G0006800ZS;BnaA09G0016200ZS;BnaA09G0…	K00010+K00010+K00469+K00469+K00469+K00888+K00889+K00889+K00889+K00889+K00889+K00889+K00913+K00921+K00921+K00921+K00921+K01092+K01092+K01092+K01092+K01092+K01092+K01092+K01092+K01092+K01092+K01092+K01092+K01092+K01099+K01099+K01099+K01099+K01099+K01099+K01106+K01110+K01114+K01114+K01114+K01114+K01803+K01803+K01803+K01803+K01803+K01803+K01803+K01858+K01858+K01858+K01858+K05857+K05857+K05857+K05857+…	https:\\www.genome.jp\dbget-bin\www_bget?map00562
Terpenoid backbone biosynthesis	ko00900	42 out of 5970 0.703517587939699%	236 out of 32833 0.718789023238815%	0.587925	1	BnaA02G0221800ZS;BnaA06G0281100ZS;BnaA09G0080000ZS;BnaC03G0549800ZS;BnaC09G0250500ZS;BnaA09G0047500ZS;BnaC02G0498100ZS;BnaA07G0152500ZS;BnaC04G0210200ZS;BnaA02G0323600ZS;BnaA09G0502500ZS;BnaA09G0245900ZS;BnaA03G0368100ZS;BnaC07G0401700ZS;BnaC09G0146100ZS;BnaC09G0159500ZS;BnaA09G0136300ZS;BnaA09G0147000ZS;BnaC09G0441000ZS;BnaA10G0158300ZS;BnaA01G0038500ZS;BnaA08G0135800ZS;BnaC01G0044000ZS;BnaC03G0…	K00021+K00099+K00099+K00099+K00626+K00626+K00869+K00919+K00919+K00991+K01597+K01641+K01662+K01662+K01770+K01770+K01770+K01770+K03526+K03526+K03527+K03527+K03527+K03527+K05356+K05356+K05356+K05356+K05954+K10960+K10960+K10960+K10960+K11778+K11778+K11778+K13789+K13789+K13789+K14066+K14066+K15892	https:\\www.genome.jp\dbget-bin\www_bget?map00900
Anthocyanin biosynthesis	ko00942	5 out of 5970 0.0837520938023451%	28 out of 32833 0.0852800536046051%	0.594508	1	BnaA02G0135600ZS;BnaA06G0035700ZS;BnaA08G0028900ZS;BnaC03G0148100ZS;BnaC03G0780100ZS	K17193+K17193+K17193+K17193+K17193	https:\\www.genome.jp\dbget-bin\www_bget?map00942
Lysine degradation	ko00310	48 out of 5970 0.804020100502513%	272 out of 32833 0.828434806444735%	0.615592	1	BnaC08G0284400ZS;BnaA01G0023600ZS;BnaA01G0039400ZS;BnaA03G0554200ZS;BnaA05G0389400ZS;BnaA06G0170700ZS;BnaA08G0182200ZS;BnaA08G0235200ZS;BnaC01G0027700ZS;BnaC01G0045100ZS;BnaC03G0694900ZS;BnaC05G0208700ZS;BnaC07G0530700ZS;BnaA04G0163200ZS;BnaC04G0458700ZS;BnaA06G0043400ZS;BnaC03G0419600ZS;BnaC06G0024800ZS;BnaC09G0250500ZS;BnaA09G0047500ZS;BnaA09G0443600ZS;BnaC05G0219300ZS;novel.4578;novel.4710;nov…	K00128+K00128+K00128+K00128+K00128+K00128+K00128+K00128+K00128+K00128+K00128+K00128+K00128+K00306+K00306+K00382+K00382+K00382+K00626+K00626+K11426+K11426+K14085+K14085+K14085+K14085+K14085+K14085+K14085+K14085+K14085+K14085+K14085+K14085+K14085+K14085+K14085+K14085+K14085+K14085+K14085+K14085+K14085+K14157+K14157+K14157+K23700+K24406	https:\\www.genome.jp\dbget-bin\www_bget?map00310
Lipoic acid metabolism	ko00785	3 out of 5970 0.050251256281407%	18 out of 32833 0.0548228916029604%	0.661163	1	BnaC08G0457200ZS;BnaA09G0603100ZS;BnaC03G0040000ZS	K03644+K03644+K03644	https:\\www.genome.jp\dbget-bin\www_bget?map00785
Pyruvate metabolism	ko00620	100 out of 5970 1.6750418760469%	574 out of 32833 1.74824109889441%	0.699711	1	BnaC08G0450700ZS;BnaA02G0383900ZS;BnaA09G0597200ZS;BnaC03G0003500ZS;BnaC09G0561100ZS;BnaA02G0032600ZS;BnaA10G0248000ZS;BnaC02G0036000ZS;novel.9515;BnaC09G0416100ZS;BnaA02G0111100ZS;BnaA03G0107100ZS;BnaA10G0138800ZS;BnaC02G0136200ZS;BnaC03G0123700ZS;BnaA01G0121600ZS;BnaA07G0122900ZS;BnaA09G0461800ZS;BnaC07G0180700ZS;BnaC08G0284400ZS;BnaA01G0023600ZS;BnaA01G0039400ZS;BnaA03G0554200ZS;BnaA05G0389400…	K00001+K00001+K00001+K00002+K00026+K00026+K00026+K00026+K00026+K00051+K00051+K00051+K00051+K00051+K00051+K00121+K00121+K00121+K00121+K00128+K00128+K00128+K00128+K00128+K00128+K00128+K00128+K00128+K00128+K00128+K00128+K00128+K00382+K00382+K00382+K00626+K00626+K00873+K00873+K00873+K00873+K00873+K00873+K01006+K01006+K01006+K01006+K01069+K01069+K01595+K01595+K01595+K01595+K01595+K01595+K01595+K01595+…	https:\\www.genome.jp\dbget-bin\www_bget?map00620
Aflatoxin biosynthesis	ko00254	1 out of 5970 0.016750418760469%	6 out of 32833 0.0182742972009868%	0.70007	1	BnaA06G0043200ZS	K11262	https:\\www.genome.jp\dbget-bin\www_bget?map00254
Ether lipid metabolism	ko00565	24 out of 5970 0.402010050251256%	144 out of 32833 0.438583132823683%	0.714149	1	BnaC08G0224200ZS;BnaC08G0497500ZS;BnaC08G0497700ZS;BnaA02G0331600ZS;BnaA08G0274600ZS;BnaA09G0640300ZS;BnaC02G0446700ZS;BnaC07G0288600ZS;BnaC09G0079600ZS;BnaA09G0085500ZS;BnaA01G0408800ZS;BnaC01G0506700ZS;BnaC04G0472700ZS;BnaC05G0052100ZS;BnaA01G0027300ZS;BnaC01G0032200ZS;BnaC03G0307300ZS;BnaC03G0452600ZS;BnaA02G0034700ZS;BnaA06G0301400ZS;BnaC02G0038500ZS;BnaC03G0017400ZS;BnaA06G0334300ZS;BnaC07G0…	K00993+K00993+K00993+K00993+K00993+K00993+K00993+K00993+K01062+K01062+K01114+K01114+K01114+K01114+K01115+K01115+K01115+K01115+K06123+K06123+K06123+K14674+K16860+K16860	https:\\www.genome.jp\dbget-bin\www_bget?map00565
Selenocompound metabolism	ko00450	24 out of 5970 0.402010050251256%	145 out of 32833 0.441628849023848%	0.727041	1	BnaA01G0394400ZS;BnaA03G0203500ZS;BnaA04G0105200ZS;BnaA05G0026000ZS;BnaA07G0174100ZS;BnaA08G0089800ZS;BnaC03G0240400ZS;BnaC04G0027600ZS;BnaC04G0388100ZS;BnaC06G0166900ZS;BnaC08G0128300ZS;novel.5966;novel.6001;BnaA03G0292400ZS;BnaC03G0351200ZS;BnaC05G0549700ZS;BnaC02G0068300ZS;BnaC08G0369300ZS;BnaA06G0050700ZS;BnaC05G0063300ZS;BnaA01G0203700ZS;BnaA06G0140400ZS;BnaA06G0440400ZS;BnaC07G0222000ZS	K00384+K00384+K00384+K00384+K00384+K00384+K00384+K00384+K00384+K00384+K00384+K00384+K00384+K00549+K00549+K00549+K01739+K01760+K11717+K11717+K13811+K13811+K13811+K13811	https:\\www.genome.jp\dbget-bin\www_bget?map00450
Valine, leucine and isoleucine biosynthesis	ko00290	19 out of 5970 0.318257956448911%	117 out of 32833 0.356348795419243%	0.742676	1	BnaA02G0242400ZS;BnaA06G0013000ZS;BnaC06G0076400ZS;BnaC06G0080600ZS;BnaC08G0199000ZS;BnaC08G0298700ZS;BnaA02G0158700ZS;BnaA06G0032400ZS;BnaA06G0063200ZS;BnaA08G0290800ZS;BnaC05G0078800ZS;BnaC08G0469100ZS;BnaA02G0063700ZS;BnaA03G0154100ZS;novel.7233;BnaA05G0036500ZS;BnaC04G0039400ZS;BnaA02G0052200ZS;BnaC02G0060000ZS	K00052+K00053+K00053+K00053+K00826+K00826+K00826+K00826+K00826+K00826+K00826+K01649+K01653+K01653+K01653+K21359+K21359+K21360+K21360	https:\\www.genome.jp\dbget-bin\www_bget?map00290
Neomycin, kanamycin and gentamicin biosynthesis	ko00524	3 out of 5970 0.050251256281407%	21 out of 32833 0.0639600402034538%	0.763007	1	BnaA10G0056100ZS;BnaC06G0022700ZS;novel.9541	K00844+K00844+K00844	https:\\www.genome.jp\dbget-bin\www_bget?map00524
Amino sugar and nucleotide sugar metabolism	ko00520	167 out of 5970 2.79731993299833%	970 out of 32833 2.95434471415953%	0.797259	1	BnaA02G0245500ZS;BnaA03G0075000ZS;BnaA10G0013600ZS;BnaC05G0015500ZS;BnaA10G0056100ZS;BnaC06G0022700ZS;novel.9541;BnaC08G0341300ZS;BnaA03G0151300ZS;BnaA04G0021200ZS;BnaA04G0205700ZS;BnaA05G0126000ZS;BnaA07G0307500ZS;BnaA09G0500800ZS;BnaA10G0088800ZS;BnaC03G0177100ZS;BnaC03G0420000ZS;BnaC04G0286400ZS;BnaC04G0512300ZS;BnaC06G0356900ZS;BnaA03G0073600ZS;BnaC03G0083900ZS;BnaC04G0517800ZS;novel.5952;Bna…	K00326+K00326+K00770+K00770+K00844+K00844+K00844+K00847+K00847+K00847+K00847+K00847+K00847+K00847+K00847+K00847+K00847+K00847+K00847+K00847+K00963+K00963+K00963+K00963+K00966+K00966+K00972+K00972+K00972+K00975+K00975+K00975+K00975+K00975+K00975+K00975+K00975+K00975+K00975+K00975+K00975+K00975+K00975+K00975+K00975+K00975+K00975+K00975+K00975+K00975+K00975+K00975+K00975+K00975+K01183+K01183+K01183+…	https:\\www.genome.jp\dbget-bin\www_bget?map00520
Monobactam biosynthesis	ko00261	8 out of 5970 0.134003350083752%	56 out of 32833 0.17056010720921%	0.822797	1	BnaA06G0098000ZS;BnaC02G0163200ZS;BnaA04G0286700ZS;BnaC04G0604800ZS;BnaA01G0203700ZS;BnaA06G0140400ZS;BnaA06G0440400ZS;BnaC07G0222000ZS	K00133+K00928+K01714+K01714+K13811+K13811+K13811+K13811	https:\\www.genome.jp\dbget-bin\www_bget?map00261
Caffeine metabolism	ko00232	1 out of 5970 0.016750418760469%	9 out of 32833 0.0274114458014802%	0.835756	1	novel.9441	K00106	https:\\www.genome.jp\dbget-bin\www_bget?map00232
Glycosphingolipid biosynthesis - lacto and neolacto series	ko00601	3 out of 5970 0.050251256281407%	24 out of 32833 0.0730971888039472%	0.838465	1	BnaC09G0622000ZS;BnaA10G0301100ZS;BnaC01G0453100ZS	K01988+K01988+K01988	https:\\www.genome.jp\dbget-bin\www_bget?map00601
Synthesis and degradation of ketone bodies	ko00072	3 out of 5970 0.050251256281407%	24 out of 32833 0.0730971888039472%	0.838465	1	BnaC09G0250500ZS;BnaA09G0047500ZS;BnaA09G0245900ZS	K00626+K00626+K01641	https:\\www.genome.jp\dbget-bin\www_bget?map00072
Linoleic acid metabolism	ko00591	10 out of 5970 0.16750418760469%	70 out of 32833 0.213200134011513%	0.842057	1	BnaC06G0315600ZS;BnaC06G0315700ZS;novel.8166;novel.8240;novel.3080;novel.3126;BnaC03G0017400ZS;BnaC09G0044400ZS;BnaA01G0301300ZS;BnaA09G0057100ZS	K00454+K00454+K00454+K00454+K00454+K00454+K14674+K15718+K15718+K15718	https:\\www.genome.jp\dbget-bin\www_bget?map00591
Sesquiterpenoid and triterpenoid biosynthesis	ko00909	18 out of 5970 0.301507537688442%	125 out of 32833 0.380714525020559%	0.890462	1	BnaC09G0058800ZS;BnaC09G0059100ZS;BnaA01G0012500ZS;BnaA02G0387500ZS;BnaA04G0056500ZS;BnaA06G0326600ZS;BnaA06G0326700ZS;BnaA09G0068700ZS;BnaC01G0014800ZS;BnaC02G0518900ZS;BnaC04G0353700ZS;BnaC07G0367400ZS;BnaC07G0522300ZS;novel.2234;BnaC07G0369300ZS;BnaC09G0479400ZS;BnaA02G0288300ZS;BnaA05G0356700ZS	K00511+K00511+K00511+K00511+K00511+K00511+K00511+K00511+K00511+K00511+K00511+K00511+K00801+K14175+K14184+K15799+K15799+K16206	https:\\www.genome.jp\dbget-bin\www_bget?map00909
Other types of O-glycan biosynthesis	ko00514	10 out of 5970 0.16750418760469%	77 out of 32833 0.234520147412664%	0.913399	1	BnaC08G0293100ZS;BnaA06G0323800ZS;BnaA07G0215000ZS;BnaA09G0555300ZS;BnaC05G0052000ZS;BnaC06G0229200ZS;BnaC09G0526200ZS;BnaC08G0463000ZS;BnaC08G0232100ZS;BnaA08G0269500ZS	K13667+K13667+K13667+K13667+K13667+K13667+K20782+K20783+K20784+K20784	https:\\www.genome.jp\dbget-bin\www_bget?map00514
Fatty acid biosynthesis	ko00061	31 out of 5970 0.519262981574539%	213 out of 32833 0.648737550635032%	0.932078	1	BnaA08G0289300ZS;BnaA10G0189700ZS;BnaC05G0554900ZS;BnaC09G0135500ZS;BnaA03G0402300ZS;BnaC07G0374000ZS;BnaC09G0149500ZS;BnaA04G0054300ZS;BnaA04G0297500ZS;BnaA05G0006100ZS;BnaA05G0470300ZS;BnaA06G0348800ZS;BnaC04G0007500ZS;BnaC04G0356100ZS;BnaC04G0614600ZS;BnaC05G0531100ZS;BnaC09G0509200ZS;BnaA03G0063900ZS;BnaA10G0208500ZS;BnaA02G0035300ZS;BnaC02G0039300ZS;BnaC09G0501100ZS;BnaA09G0228200ZS;BnaC04G0…	K00059+K00059+K00059+K00648+K00648+K00648+K01897+K01897+K01897+K01897+K01897+K01897+K01897+K01897+K01897+K01897+K02160+K02160+K02160+K02372+K02372+K03921+K03921+K03921+K09458+K10781+K10781+K10781+K10782+K10782+K11262	https:\\www.genome.jp\dbget-bin\www_bget?map00061
Base excision repair	ko03410	30 out of 5970 0.50251256281407%	207 out of 32833 0.630463253434045%	0.932762	1	BnaA02G0288700ZS;BnaA05G0423700ZS;BnaA06G0088200ZS;BnaC02G0393300ZS;BnaC05G0475600ZS;BnaC06G0246800ZS;BnaC05G0064500ZS;BnaA01G0138000ZS;BnaA05G0175400ZS;BnaA09G0377100ZS;BnaC01G0176400ZS;BnaC05G0294800ZS;BnaC06G0099800ZS;novel.7666;BnaA07G0294400ZS;BnaC06G0339600ZS;BnaA05G0139500ZS;BnaC06G0121600ZS;BnaC08G0202100ZS;BnaC08G0519200ZS;BnaA02G0173100ZS;BnaA07G0290700ZS;BnaA08G0288600ZS;BnaA09G0657700…	K01246+K01246+K01246+K01246+K01246+K01246+K02327+K02335+K02335+K02335+K02335+K02335+K02335+K03575+K03648+K03648+K04802+K10563+K10773+K10773+K10773+K10773+K10773+K10773+K10773+K10773+K10773+K10773+K10798+K10802	https:\\www.genome.jp\dbget-bin\www_bget?map03410
Arachidonic acid metabolism	ko00590	20 out of 5970 0.33500837520938%	145 out of 32833 0.441628849023848%	0.934939	1	BnaA09G0544400ZS;BnaC08G0428600ZS;BnaA03G0529000ZS;BnaA07G0222500ZS;BnaA09G0577200ZS;BnaC04G0257400ZS;BnaC06G0239400ZS;BnaC07G0506700ZS;BnaC09G0525900ZS;Bnascaffold0026G0062200ZS;BnaA03G0430800ZS;BnaA03G0431200ZS;BnaA05G0330100ZS;BnaC07G0404900ZS;BnaC03G0017400ZS;novel.9444;novel.3553;BnaA03G0510200ZS;BnaC01G0007400ZS;BnaC07G0488400ZS	K00079+K00432+K00432+K00432+K00432+K00432+K00432+K00432+K01254+K01254+K08726+K08726+K08726+K08726+K14674+K15730+K15730+K18592+K18592+K18592	https:\\www.genome.jp\dbget-bin\www_bget?map00590
Protein export	ko03060	48 out of 5970 0.804020100502513%	323 out of 32833 0.983766332653123%	0.951156	1	BnaA03G0274500ZS;BnaA05G0369700ZS;BnaA08G0223200ZS;BnaA08G0242900ZS;BnaA09G0433100ZS;BnaC03G0330900ZS;BnaA07G0066800ZS;BnaC07G0100500ZS;BnaC09G0607200ZS;BnaA02G0014700ZS;BnaA10G0287900ZS;BnaC02G0014400ZS;BnaA03G0222100ZS;BnaA04G0288800ZS;BnaA04G0288900ZS;BnaA05G0055100ZS;BnaA05G0055200ZS;BnaA09G0554600ZS;BnaC03G0261200ZS;BnaC04G0061400ZS;BnaC04G0061500ZS;BnaC04G0607200ZS;BnaC04G0607300ZS;BnaC09G0…	K03070+K03070+K03070+K03070+K03070+K03070+K03100+K03100+K03106+K03106+K03106+K03106+K03110+K03110+K03110+K03110+K03110+K03110+K03110+K03110+K03110+K03110+K03110+K03116+K03116+K03116+K03116+K03116+K03116+K03116+K03116+K03118+K03118+K03118+K03118+K03217+K03217+K03217+K09481+K09648+K09648+K09648+K09648+K10956+K10956+K10956+K13280+K13280	https:\\www.genome.jp\dbget-bin\www_bget?map03060
Purine metabolism	ko00230	87 out of 5970 1.4572864321608%	557 out of 32833 1.69646392349161%	0.951374	1	novel.9441;BnaA02G0038800ZS;BnaA10G0237800ZS;BnaC02G0043700ZS;BnaC06G0241900ZS;BnaC06G0458900ZS;BnaA07G0036400ZS;BnaC01G0040600ZS;BnaC08G0524900ZS;BnaA01G0168800ZS;BnaA03G0498800ZS;BnaC01G0216900ZS;BnaC07G0477200ZS;BnaA01G0008600ZS;BnaA03G0393500ZS;BnaA03G0567200ZS;BnaA08G0192300ZS;BnaA09G0105100ZS;BnaC01G0010100ZS;BnaC03G0487200ZS;BnaC07G0541600ZS;BnaC08G0499200ZS;BnaA01G0219900ZS;BnaA07G0138600…	K00106+K00759+K00759+K00759+K00759+K00759+K00764+K00764+K00856+K00856+K00856+K00856+K00856+K00860+K00860+K00860+K00860+K00860+K00860+K00860+K00860+K00873+K00873+K00873+K00873+K00873+K00873+K00939+K00939+K00939+K00939+K00939+K00939+K00940+K00940+K00940+K00948+K00951+K00951+K00951+K00951+K00951+K01081+K01466+K01510+K01510+K01510+K01510+K01510+K01510+K01510+K01510+K01513+K01513+K01513+K01513+K01513+…	https:\\www.genome.jp\dbget-bin\www_bget?map00230
Biosynthesis of unsaturated fatty acids	ko01040	10 out of 5970 0.16750418760469%	84 out of 32833 0.255840160813815%	0.95536	1	BnaC03G0198000ZS;BnaA03G0279800ZS;BnaC09G0501100ZS;BnaA09G0228200ZS;BnaC04G0043700ZS;BnaA07G0102200ZS;BnaC07G0154300ZS;BnaC09G0552800ZS;BnaA02G0102800ZS;BnaC03G0047500ZS	K00232+K01068+K03921+K03921+K03921+K10251+K10251+K10703+K10703+K10703	https:\\www.genome.jp\dbget-bin\www_bget?map01040
C5-Branched dibasic acid metabolism	ko00660	4 out of 5970 0.067001675041876%	43 out of 32833 0.130965796607072%	0.966008	1	BnaA02G0242400ZS;BnaA02G0063700ZS;BnaA03G0154100ZS;novel.7233	K00052+K01653+K01653+K01653	https:\\www.genome.jp\dbget-bin\www_bget?map00660
Pyrimidine metabolism	ko00240	53 out of 5970 0.887772194304858%	361 out of 32833 1.09950354825937%	0.967045	1	BnaC08G0340100ZS;BnaA09G0499700ZS;BnaA01G0159500ZS;BnaA08G0002600ZS;BnaC01G0204000ZS;BnaC03G0815100ZS;BnaA06G0285000ZS;BnaA09G0083500ZS;BnaC03G0544700ZS;BnaA07G0247600ZS;BnaC09G0476100ZS;BnaA10G0184800ZS;BnaC04G0102100ZS;BnaC08G0018600ZS;BnaA09G0087900ZS;BnaA07G0010500ZS;BnaC08G0159800ZS;BnaC08G0492600ZS;BnaA01G0139500ZS;BnaA01G0306500ZS;BnaA08G0175500ZS;BnaC01G0178000ZS;BnaC01G0378900ZS;BnaC05G0…	K00761+K00761+K00876+K00876+K00876+K00876+K00940+K00940+K00940+K01081+K01240+K01240+K01240+K01240+K01431+K01489+K01510+K01510+K01510+K01510+K01510+K01510+K01510+K01510+K01513+K01513+K01513+K01513+K01513+K01513+K01513+K01513+K01513+K01513+K01513+K01513+K01513+K01513+K01513+K01937+K03787+K03787+K03787+K03787+K09903+K09903+K09903+K09903+K10807+K13800+K13998+K13998+K16904	https:\\www.genome.jp\dbget-bin\www_bget?map00240
Lysine biosynthesis	ko00300	10 out of 5970 0.16750418760469%	92 out of 32833 0.280205890415131%	0.980397	1	BnaA06G0098000ZS;BnaC02G0163200ZS;BnaA04G0286700ZS;BnaC04G0604800ZS;BnaC08G0337400ZS;BnaA02G0387000ZS;BnaA03G0160100ZS;BnaA03G0391700ZS;BnaC01G0049500ZS;BnaC03G0484900ZS	K00133+K00928+K01714+K01714+K01778+K10206+K10206+K10206+K10206+K10206	https:\\www.genome.jp\dbget-bin\www_bget?map00300
Propanoate metabolism	ko00640	21 out of 5970 0.351758793969849%	172 out of 32833 0.523863186428289%	0.987	1	BnaC05G0184400ZS;BnaC03G0198000ZS;BnaA06G0043400ZS;BnaC03G0419600ZS;BnaC06G0024800ZS;BnaC09G0250500ZS;BnaA09G0047500ZS;BnaA05G0351700ZS;BnaA03G0403600ZS;BnaC09G0509200ZS;BnaA03G0063900ZS;BnaA10G0208500ZS;BnaC08G0526100ZS;BnaA02G0420000ZS;BnaA04G0189100ZS;BnaA04G0189700ZS;BnaA06G0056200ZS;BnaC05G0070300ZS;BnaC08G0024500ZS;BnaA06G0043200ZS;BnaC09G0079200ZS	K00166+K00232+K00382+K00382+K00382+K00626+K00626+K01578+K01895+K02160+K02160+K02160+K05605+K05605+K05605+K05605+K05605+K05605+K05605+K11262+K18369	https:\\www.genome.jp\dbget-bin\www_bget?map00640
Phosphatidylinositol signaling system	ko04070	67 out of 5970 1.12227805695142%	471 out of 32833 1.43453233027746%	0.990952	1	BnaC06G0052900ZS;BnaC08G0201200ZS;BnaC08G0201500ZS;BnaC08G0421800ZS;BnaA03G0124300ZS;BnaA06G0070700ZS;BnaA09G0033300ZS;BnaA01G0070200ZS;BnaA03G0502500ZS;BnaA09G0126600ZS;BnaC01G0083300ZS;BnaA03G0071100ZS;BnaA01G0354200ZS;BnaC01G0440700ZS;BnaC05G0497200ZS;BnaC05G0497300ZS;BnaC08G0397600ZS;BnaA01G0161800ZS;BnaA09G0551100ZS;BnaC01G0206900ZS;BnaA02G0250100ZS;BnaA03G0277600ZS;BnaA05G0011100ZS;BnaA06G0…	K00888+K00889+K00889+K00889+K00889+K00889+K00889+K00901+K00901+K00901+K00901+K00913+K00921+K00921+K00921+K00921+K00981+K00981+K00981+K00981+K01092+K01092+K01092+K01092+K01092+K01092+K01092+K01092+K01092+K01092+K01092+K01092+K01092+K01099+K01099+K01099+K01099+K01099+K01099+K01106+K01110+K02183+K02183+K02183+K02183+K02183+K05857+K05857+K05857+K05857+K05857+K05857+K05857+K05857+K05857+K10572+K10572+…	https:\\www.genome.jp\dbget-bin\www_bget?map04070
Fatty acid metabolism	ko01212	41 out of 5970 0.68676716917923%	312 out of 32833 0.950263454451314%	0.993411	1	BnaA08G0289300ZS;BnaA10G0189700ZS;BnaC05G0554900ZS;BnaC03G0198000ZS;BnaC09G0250500ZS;BnaA09G0047500ZS;BnaC09G0135500ZS;BnaA03G0402300ZS;BnaC07G0374000ZS;BnaA01G0177200ZS;BnaC01G0227100ZS;BnaC09G0149500ZS;BnaA04G0054300ZS;BnaA04G0297500ZS;BnaA05G0006100ZS;BnaA05G0470300ZS;BnaA06G0348800ZS;BnaC04G0007500ZS;BnaC04G0356100ZS;BnaC04G0614600ZS;BnaC05G0531100ZS;BnaC09G0509200ZS;BnaA03G0063900ZS;BnaA10G0…	K00059+K00059+K00059+K00232+K00626+K00626+K00648+K00648+K00648+K01074+K01074+K01897+K01897+K01897+K01897+K01897+K01897+K01897+K01897+K01897+K01897+K02160+K02160+K02160+K02372+K02372+K03921+K03921+K03921+K09458+K10251+K10251+K10527+K10527+K10703+K10703+K10703+K10781+K10781+K10781+K11262	https:\\www.genome.jp\dbget-bin\www_bget?map01212
Various types of N-glycan biosynthesis	ko00513	18 out of 5970 0.301507537688442%	167 out of 32833 0.508634605427466%	0.996945	1	BnaC08G0237300ZS;BnaA06G0114500ZS;BnaA08G0264600ZS;BnaC05G0140600ZS;BnaA05G0047800ZS;BnaA06G0447400ZS;BnaA08G0195600ZS;BnaC01G0005400ZS;BnaC04G0053500ZS;BnaC04G0414700ZS;novel.1080;novel.1716;novel.3642;BnaA08G0108500ZS;BnaA09G0680300ZS;BnaC06G0324200ZS;BnaC06G0083000ZS;BnaA07G0110100ZS	K03844+K03844+K03844+K03844+K03847+K03847+K03847+K03847+K03847+K03847+K03847+K03847+K03847+K07441+K12373+K12373+K12669+K14413	https:\\www.genome.jp\dbget-bin\www_bget?map00513
Glycosylphosphatidylinositol (GPI)-anchor biosynthesis	ko00563	15 out of 5970 0.251256281407035%	146 out of 32833 0.444674565224012%	0.997107	1	BnaC09G0107300ZS;Bnascaffold0157G0000100ZS;BnaA01G0412300ZS;BnaA02G0212500ZS;BnaA03G0393900ZS;BnaA07G0245600ZS;BnaA07G0354800ZS;BnaA09G0106000ZS;BnaA09G0459300ZS;BnaC01G0502900ZS;BnaC02G0283900ZS;BnaC03G0488200ZS;BnaC06G0417700ZS;BnaC08G0480100ZS;novel.4259	K03860+K03860+K03860+K03860+K03860+K03860+K03860+K03860+K03860+K03860+K03860+K03860+K03860+K05287+K05290	https:\\www.genome.jp\dbget-bin\www_bget?map00563
Sulfur relay system	ko04122	2 out of 5970 0.033500837520938%	44 out of 32833 0.134011512807237%	0.998431	1	BnaA06G0110900ZS;BnaC02G0094000ZS	K01011+K11996	https:\\www.genome.jp\dbget-bin\www_bget?map04122
Biotin metabolism	ko00780	7 out of 5970 0.117252931323283%	109 out of 32833 0.331983065817927%	0.9999	1	BnaA08G0289300ZS;BnaA10G0189700ZS;BnaC05G0554900ZS;BnaC09G0071600ZS;BnaA02G0035300ZS;BnaC02G0039300ZS;novel.8476	K00059+K00059+K00059+K01942+K02372+K02372+K09458	https:\\www.genome.jp\dbget-bin\www_bget?map00780
N-Glycan biosynthesis	ko00510	24 out of 5970 0.402010050251256%	250 out of 32833 0.761429050041117%	0.99995	1	BnaC09G0517400ZS;novel.4486;BnaA07G0101300ZS;BnaC07G0153200ZS;BnaC08G0237300ZS;BnaA06G0114500ZS;BnaA08G0264600ZS;BnaC05G0140600ZS;BnaA05G0047800ZS;BnaA06G0447400ZS;BnaA08G0195600ZS;BnaC01G0005400ZS;BnaC04G0053500ZS;BnaC04G0414700ZS;novel.1080;novel.1716;novel.3642;BnaA01G0289800ZS;BnaC09G0100200ZS;BnaA09G0100500ZS;BnaA08G0108500ZS;BnaC09G0111200ZS;BnaC03G0495900ZS;BnaC06G0083000ZS	K00737+K00737+K01228+K01228+K03844+K03844+K03844+K03844+K03847+K03847+K03847+K03847+K03847+K03847+K03847+K03847+K03847+K05546+K07252+K07252+K07441+K12345+K12345+K12669	https:\\www.genome.jp\dbget-bin\www_bget?map00510
Autophagy - other	ko04136	17 out of 5970 0.284757118927973%	212 out of 32833 0.645691834434867%	0.999992	1	BnaC02G0244400ZS;BnaA08G0034400ZS;BnaA03G0214700ZS;BnaA05G0041600ZS;BnaC03G0253200ZS;BnaC04G0045400ZS;BnaA03G0303400ZS;BnaA05G0466100ZS;BnaA07G0201700ZS;BnaA08G0117200ZS;BnaA09G0551300ZS;BnaC04G0603300ZS;BnaC06G0210300ZS;BnaC07G0439500ZS;BnaA06G0437700ZS;BnaA01G0417600ZS;BnaC01G0497500ZS	K04382+K08269+K08333+K08333+K08333+K08333+K08341+K08341+K08341+K08341+K08341+K08341+K08341+K08341+K17606+K17908+K17908	https:\\www.genome.jp\dbget-bin\www_bget?map04136
Citrate cycle (TCA cycle)	ko00020	22 out of 5970 0.368509212730318%	274 out of 32833 0.834526238845064%	0.999999	1	BnaC09G0561100ZS;BnaA02G0032600ZS;BnaA10G0248000ZS;BnaC02G0036000ZS;novel.9515;BnaA07G0174400ZS;BnaA06G0043400ZS;BnaC03G0419600ZS;BnaC06G0024800ZS;BnaA02G0414700ZS;BnaA06G0306000ZS;BnaC01G0013800ZS;BnaC02G0550700ZS;BnaC03G0518500ZS;BnaC08G0384900ZS;BnaA05G0033900ZS;BnaC02G0072400ZS;BnaC04G0036600ZS;BnaC04G0289100ZS;BnaA06G0356800ZS;BnaA08G0287200ZS;BnaC07G0336100ZS	K00026+K00026+K00026+K00026+K00026+K00235+K00382+K00382+K00382+K01610+K01610+K01610+K01610+K01610+K01647+K01647+K01647+K01647+K01647+K01648+K01648+K01648	https:\\www.genome.jp\dbget-bin\www_bget?map00020
RNA degradation	ko03018	89 out of 5970 1.49078726968174%	762 out of 32833 2.32083574452533%	1	1	BnaA01G0050200ZS;BnaA01G0157600ZS;BnaA02G0026300ZS;BnaA06G0138600ZS;BnaA06G0138900ZS;BnaA08G0214700ZS;BnaA09G0492500ZS;BnaC01G0058900ZS;BnaC01G0096300ZS;BnaC01G0200700ZS;BnaC03G0203900ZS;BnaC03G0649900ZS;BnaC04G0132600ZS;BnaC05G0167300ZS;BnaC05G0167600ZS;BnaC05G0268500ZS;BnaC05G0268800ZS;BnaC07G0383400ZS;novel.7275;Bnascaffold2773G0000100ZS;BnaA03G0291900ZS;BnaC03G0350900ZS;BnaA01G0205200ZS;BnaA0…	K00850+K00850+K00850+K00850+K00850+K00850+K00850+K00850+K00850+K00850+K00850+K00850+K00850+K00850+K00850+K00850+K00850+K00850+K00850+K00962+K00962+K00962+K01148+K01148+K01148+K01148+K01148+K01148+K01148+K01148+K01148+K01689+K01689+K01689+K04043+K04077+K04077+K04077+K04077+K04077+K04077+K04077+K04077+K04077+K04077+K04077+K04077+K04077+K04077+K04077+K04077+K04077+K04077+K04077+K04077+K04077+K04077+…	https:\\www.genome.jp\dbget-bin\www_bget?map03018
Basal transcription factors	ko03022	20 out of 5970 0.33500837520938%	270 out of 32833 0.822343374044406%	1	1	BnaC09G0076300ZS;BnaA02G0337800ZS;BnaA02G0408600ZS;BnaA06G0283700ZS;BnaA06G0294500ZS;BnaA07G0230200ZS;BnaC02G0543300ZS;BnaC03G0546500ZS;BnaC06G0373100ZS;BnaC07G0297300ZS;BnaA03G0479800ZS;BnaC07G0457800ZS;BnaA09G0113500ZS;BnaA09G0541800ZS;novel.1262;BnaC06G0271200ZS;BnaA03G0268400ZS;BnaC03G0322000ZS;BnaA07G0334600ZS;BnaC06G0392600ZS	K03122+K03122+K03122+K03122+K03122+K03122+K03122+K03122+K03122+K03122+K03123+K03123+K03131+K03131+K03136+K03139+K06634+K06634+K10844+K10844	https:\\www.genome.jp\dbget-bin\www_bget?map03022
Phagosome	ko04145	46 out of 5970 0.770519262981575%	490 out of 32833 1.49240093808059%	1	1	BnaA01G0354200ZS;BnaC01G0440700ZS;BnaC05G0497200ZS;BnaC05G0497300ZS;BnaA09G0042100ZS;novel.9236;novel.7022;BnaA09G0145100ZS;BnaC09G0137100ZS;novel.8376;BnaC03G0743600ZS;BnaA01G0081400ZS;BnaA03G0399500ZS;BnaA07G0135400ZS;BnaA07G0355700ZS;BnaA08G0248700ZS;BnaA09G0114100ZS;BnaC01G0098600ZS;BnaC04G0052800ZS;BnaC07G0197400ZS;BnaA06G0032700ZS;novel.5768;BnaA04G0191000ZS;BnaA05G0139700ZS;BnaA06G0258900Z…	K00921+K00921+K00921+K00921+K02146+K02146+K02147+K02150+K02154+K02154+K02155+K04392+K04392+K04392+K04392+K04392+K04392+K04392+K04392+K04392+K07374+K07374+K07375+K07375+K07375+K07375+K07375+K07375+K07375+K07375+K07375+K07897+K07897+K07897+K07897+K07897+K07897+K07897+K07897+K08488+K08488+K08488+K09481+K10956+K10956+K10956	https:\\www.genome.jp\dbget-bin\www_bget?map04145
RNA polymerase	ko03020	18 out of 5970 0.301507537688442%	306 out of 32833 0.931989157250327%	1	1	BnaC03G0132100ZS;novel.5138;novel.6384;novel.7194;novel.7953;novel.8336;novel.8863;novel.9276;novel.9476;novel.1123;novel.1146;novel.1631;novel.2338;novel.2792;BnaC03G0725500ZS;BnaC09G0108100ZS;novel.3062;BnaC09G0183500ZS	K03006+K03006+K03006+K03006+K03006+K03006+K03006+K03006+K03006+K03006+K03006+K03006+K03006+K03006+K03010+K03011+K03018+K03027	https:\\www.genome.jp\dbget-bin\www_bget?map03020
SNARE interactions in vesicular transport	ko04130	8 out of 5970 0.134003350083752%	217 out of 32833 0.66092041543569%	1	1	BnaC08G0184500ZS;BnaA06G0051300ZS;BnaA08G0298900ZS;BnaC05G0063900ZS;BnaA02G0066600ZS;BnaC07G0299500ZS;novel.8728;BnaA08G0218400ZS	K08486+K08486+K08486+K08486+K08488+K08488+K08488+K08500	https:\\www.genome.jp\dbget-bin\www_bget?map04130
Homologous recombination	ko03440	64 out of 5970 1.07202680067002%	723 out of 32833 2.20205281271891%	1	1	BnaC05G0064500ZS;BnaA01G0138000ZS;BnaA05G0175400ZS;BnaA09G0377100ZS;BnaC01G0176400ZS;BnaC05G0294800ZS;BnaC06G0099800ZS;BnaA01G0421500ZS;BnaC01G0494200ZS;BnaC08G0483600ZS;BnaC09G0172000ZS;BnaC09G0456100ZS;BnaA05G0413200ZS;BnaC07G0172100ZS;BnaC07G0249100ZS;novel.5588;novel.5730;novel.6645;novel.9099;novel.9119;BnaC01G0137900ZS;BnaC01G0138000ZS;BnaA03G0272400ZS;BnaC09G0460900ZS;BnaA05G0367700ZS;BnaA…	K02327+K02335+K02335+K02335+K02335+K02335+K02335+K03655+K03655+K07466+K07466+K07466+K07466+K07466+K07466+K07466+K07466+K07466+K07466+K07466+K10683+K10683+K10728+K10875+K10875+K10875+K10875+K12173+K12173+K12173+K12173+K12173+K12173+K12173+K12173+K12173+K12173+K12173+K12173+K12173+K12173+K12173+K12173+K12173+K12173+K12173+K12173+K12173+K12173+K12173+K12173+K12173+K12173+K12173+K12173+K12173+K12173+…	https:\\www.genome.jp\dbget-bin\www_bget?map03440
Endocytosis	ko04144	101 out of 5970 1.69179229480737%	1012 out of 32833 3.08226479456644%	1	1	BnaC08G0201200ZS;BnaC08G0201500ZS;BnaC08G0421800ZS;BnaA03G0124300ZS;BnaA06G0070700ZS;BnaA09G0033300ZS;BnaA01G0027300ZS;BnaC01G0032200ZS;BnaC03G0307300ZS;BnaC03G0452600ZS;BnaC08G0520700ZS;BnaA03G0479600ZS;BnaA06G0148400ZS;BnaA07G0129900ZS;BnaA08G0176100ZS;BnaA09G0694100ZS;BnaC01G0457500ZS;BnaC05G0179900ZS;BnaC05G0431600ZS;BnaC07G0377000ZS;novel.4681;novel.6107;novel.8859;novel.9097;novel.1098;nove…	K00889+K00889+K00889+K00889+K00889+K00889+K01115+K01115+K01115+K01115+K01528+K03283+K03283+K03283+K03283+K03283+K03283+K03283+K03283+K03283+K03283+K03283+K03283+K03283+K03283+K03283+K07897+K07897+K07897+K07897+K07897+K07897+K07897+K07897+K07904+K07904+K07904+K07904+K07904+K07904+K07904+K07904+K07904+K07904+K07904+K07904+K07904+K07904+K07904+K07937+K07937+K07937+K07937+K07937+K10396+K12183+K12191+…	https:\\www.genome.jp\dbget-bin\www_bget?map04144
Nucleotide excision repair	ko03420	28 out of 5970 0.469011725293132%	657 out of 32833 2.00103554350806%	1	1	BnaC05G0064500ZS;BnaA01G0138000ZS;BnaA05G0175400ZS;BnaA09G0377100ZS;BnaC01G0176400ZS;BnaC05G0294800ZS;BnaC06G0099800ZS;BnaA05G0139500ZS;BnaA03G0268400ZS;BnaC03G0322000ZS;BnaC08G0483600ZS;BnaC09G0172000ZS;BnaC09G0456100ZS;BnaA05G0413200ZS;BnaC07G0172100ZS;BnaC07G0249100ZS;novel.5588;novel.5730;novel.6645;novel.9099;novel.9119;BnaA07G0372100ZS;BnaA01G0143700ZS;BnaA09G0204000ZS;BnaC01G0182700ZS;BnaC…	K02327+K02335+K02335+K02335+K02335+K02335+K02335+K04802+K06634+K06634+K07466+K07466+K07466+K07466+K07466+K07466+K07466+K07466+K07466+K07466+K07466+K10570+K10755+K10755+K10755+K10839+K10844+K10844	https:\\www.genome.jp\dbget-bin\www_bget?map03420
Mismatch repair	ko03430	24 out of 5970 0.402010050251256%	562 out of 32833 1.71169250449243%	1	1	BnaC05G0064500ZS;BnaA05G0139500ZS;BnaA02G0135400ZS;BnaA02G0154900ZS;BnaA06G0441900ZS;BnaC02G0170500ZS;BnaC02G0198100ZS;BnaC07G0219400ZS;BnaC08G0483600ZS;BnaC09G0172000ZS;BnaC09G0456100ZS;BnaA05G0413200ZS;BnaC07G0172100ZS;BnaC07G0249100ZS;novel.5588;novel.5730;novel.6645;novel.9099;novel.9119;BnaA02G0359400ZS;BnaA09G0012800ZS;BnaA01G0143700ZS;BnaA09G0204000ZS;BnaC01G0182700ZS	K02327+K04802+K07456+K07456+K07456+K07456+K07456+K07456+K07466+K07466+K07466+K07466+K07466+K07466+K07466+K07466+K07466+K07466+K07466+K08737+K08737+K10755+K10755+K10755	https:\\www.genome.jp\dbget-bin\www_bget?map03430
RNA transport	ko03013	55 out of 5970 0.921273031825796%	1113 out of 32833 3.38988213078305%	1	1	BnaA03G0385300ZS;BnaA10G0252800ZS;BnaC03G0476600ZS;BnaC09G0349400ZS;BnaA03G0501500ZS;BnaA07G0234700ZS;BnaC03G0155000ZS;BnaC06G0254900ZS;BnaC04G0573600ZS;novel.4071;novel.5652;novel.7783;novel.9522;novel.10027;novel.3603;BnaA04G0247500ZS;BnaC04G0562700ZS;BnaC06G0081300ZS;BnaC08G0460100ZS;BnaA09G0417000ZS;BnaC05G0252600ZS;BnaC05G0123800ZS;BnaC08G0219200ZS;BnaA08G0277700ZS;BnaC09G0434100ZS;BnaA04G01…	K00784+K00784+K00784+K03231+K03231+K03231+K03231+K03231+K03237+K03238+K03238+K03238+K03238+K03238+K03238+K03239+K03239+K03239+K03243+K03251+K03251+K03252+K03257+K03257+K03539+K03539+K03539+K03539+K03680+K03754+K07936+K13126+K13126+K13126+K13126+K13126+K14004+K14289+K14292+K14292+K14292+K14292+K14292+K14292+K14292+K14292+K14292+K14292+K14297+K14297+K14297+K14308+K14321+K18213+K18213	https:\\www.genome.jp\dbget-bin\www_bget?map03013
DNA replication	ko03030	24 out of 5970 0.402010050251256%	627 out of 32833 1.90966405750312%	1	1	novel.1000;BnaC05G0064500ZS;BnaA01G0138000ZS;BnaA05G0175400ZS;BnaA09G0377100ZS;BnaC01G0176400ZS;BnaC05G0294800ZS;BnaC06G0099800ZS;BnaC05G0295900ZS;BnaA05G0139500ZS;BnaC08G0483600ZS;BnaC09G0172000ZS;BnaC09G0456100ZS;BnaA05G0413200ZS;BnaC07G0172100ZS;BnaC07G0249100ZS;novel.5588;novel.5730;novel.6645;novel.9099;novel.9119;BnaA01G0143700ZS;BnaA09G0204000ZS;BnaC01G0182700ZS	K02209+K02327+K02335+K02335+K02335+K02335+K02335+K02335+K02542+K04802+K07466+K07466+K07466+K07466+K07466+K07466+K07466+K07466+K07466+K07466+K07466+K10755+K10755+K10755	https:\\www.genome.jp\dbget-bin\www_bget?map03030
Ubiquitin mediated proteolysis	ko04120	65 out of 5970 1.08877721943049%	883 out of 32833 2.68936740474523%	1	1	BnaC04G0280900ZS;novel.7534;BnaA05G0392000ZS;BnaC06G0192600ZS;BnaC09G0607700ZS;BnaA02G0272900ZS;BnaA10G0288400ZS;BnaC03G0016900ZS;BnaC07G0350900ZS;BnaA01G0046100ZS;BnaA01G0149900ZS;BnaC01G0190600ZS;BnaC04G0342100ZS;novel.4566;novel.5415;BnaA03G0055300ZS;novel.7500;BnaC02G0140100ZS;BnaC08G0266400ZS;BnaC03G0643700ZS;BnaC03G0643800ZS;BnaC08G0358600ZS;BnaA07G0288100ZS;BnaC06G0362100ZS;BnaA06G0053500Z…	K03094+K03094+K03350+K03350+K03354+K03354+K03354+K03354+K03358+K03363+K03363+K03363+K03363+K03363+K03363+K03364+K03364+K03873+K03875+K03875+K03875+K04506+K04506+K04506+K04706+K04706+K06688+K06688+K06688+K06689+K06689+K06689+K06689+K06689+K06689+K09561+K09561+K09561+K09561+K10144+K10144+K10260+K10260+K10260+K10260+K10260+K10260+K10260+K10260+K10260+K10260+K10260+K10260+K10570+K10573+K10573+K10580+…	https:\\www.genome.jp\dbget-bin\www_bget?map04120
mRNA surveillance pathway	ko03015	26 out of 5970 0.435510887772194%	678 out of 32833 2.06499558371151%	1	1	BnaC02G0244400ZS;BnaC05G0534300ZS;BnaC02G0154100ZS;BnaC08G0323500ZS;BnaA09G0485900ZS;BnaA09G0486100ZS;BnaA10G0048200ZS;BnaC04G0347900ZS;BnaA01G0301200ZS;BnaA03G0556300ZS;BnaA05G0336300ZS;BnaA06G0098100ZS;BnaA07G0125100ZS;BnaA09G0463600ZS;BnaA09G0630800ZS;BnaA09G0680700ZS;BnaA09G0702100ZS;BnaA09G0717500ZS;BnaC01G0024700ZS;BnaC03G0693200ZS;BnaC05G0120400ZS;BnaC05G0359200ZS;BnaC07G0532800ZS;BnaC09G0…	K04382+K06269+K11584+K13126+K13126+K13126+K13126+K13126+K14399+K14399+K14399+K14399+K14399+K14399+K14399+K14399+K14399+K14399+K14399+K14399+K14399+K14399+K14399+K14411+K14411+K14411	https:\\www.genome.jp\dbget-bin\www_bget?map03015
Ribosome biogenesis in eukaryotes	ko03008	41 out of 5970 0.68676716917923%	654 out of 32833 1.99189839490756%	1	1	BnaA01G0424700ZS;BnaA05G0453300ZS;BnaC01G0063000ZS;BnaC04G0029100ZS;BnaC05G0511400ZS;BnaC07G0256800ZS;BnaC09G0434100ZS;BnaA04G0125500ZS;BnaC04G0413600ZS;BnaC06G0171900ZS;BnaA07G0228200ZS;BnaA07G0386000ZS;BnaC06G0246100ZS;novel.7407;novel.8627;novel.8903;novel.9447;novel.10083;novel.10084;novel.3384;novel.360;BnaC08G0429700ZS;BnaC02G0049700ZS;BnaA02G0073100ZS;BnaC02G0364400ZS;BnaC04G0491100ZS;BnaC…	K03097+K03097+K03097+K03097+K03097+K03115+K03539+K03539+K03539+K03539+K06943+K06943+K06943+K06943+K06943+K06943+K06943+K06943+K06943+K06943+K06943+K07178+K07936+K11128+K11131+K11131+K11883+K11883+K14521+K14521+K14536+K14544+K14544+K14548+K14548+K14558+K14567+K14570+K14570+K14570+K14573	https:\\www.genome.jp\dbget-bin\www_bget?map03008
Oxidative phosphorylation	ko00190	53 out of 5970 0.887772194304858%	844 out of 32833 2.57058447293881%	1	1	BnaA07G0174400ZS;BnaC08G0337900ZS;BnaA02G0251700ZS;BnaA03G0036800ZS;BnaA09G0115900ZS;BnaA09G0497800ZS;BnaA09G0714000ZS;BnaA10G0248100ZS;BnaC02G0338200ZS;BnaC03G0043400ZS;BnaC09G0407000ZS;BnaA02G0118400ZS;BnaA03G0516200ZS;BnaA06G0406600ZS;BnaA08G0156100ZS;BnaA10G0132400ZS;BnaA10G0147500ZS;BnaC02G0145800ZS;BnaC03G0774500ZS;BnaC07G0494700ZS;BnaC07G0494800ZS;novel.5785;novel.7742;novel.8354;BnaA01G00…	K00235+K01507+K01507+K01507+K01507+K01507+K01507+K01507+K01507+K01507+K01535+K01535+K01535+K01535+K01535+K01535+K01535+K01535+K01535+K01535+K01535+K01535+K01535+K01535+K02109+K02109+K02113+K02113+K02113+K02113+K02113+K02113+K02115+K02115+K02115+K02115+K02115+K02115+K02133+K02140+K02146+K02146+K02147+K02150+K02154+K02154+K02155+K02258+K02265+K03884+K03884+K03884+K03955	https:\\www.genome.jp\dbget-bin\www_bget?map00190
Ribosome	ko03010	156 out of 5970 2.61306532663317%	1620 out of 32833 4.93406024426644%	1	1	BnaA04G0000500ZS;BnaC04G0254500ZS;BnaC09G0526000ZS;BnaA10G0221400ZS;BnaC02G0056300ZS;novel.9163;BnaA08G0072000ZS;BnaA09G0388300ZS;BnaC05G0288500ZS;BnaA02G0232600ZS;BnaA07G0376800ZS;BnaC02G0313200ZS;BnaC06G0442400ZS;BnaA03G0082500ZS;BnaA03G0374100ZS;BnaC03G0094500ZS;BnaC09G0268600ZS;BnaA06G0392300ZS;BnaA09G0228900ZS;BnaC07G0293300ZS;BnaC08G0342500ZS;BnaA07G0187800ZS;BnaA09G0501900ZS;BnaC06G0188500…	K02863+K02863+K02864+K02864+K02864+K02864+K02867+K02867+K02867+K02871+K02871+K02871+K02871+K02875+K02875+K02875+K02876+K02876+K02876+K02876+K02879+K02879+K02879+K02879+K02881+K02881+K02881+K02881+K02881+K02881+K02881+K02882+K02882+K02884+K02884+K02884+K02884+K02884+K02884+K02885+K02885+K02885+K02885+K02888+K02888+K02891+K02894+K02894+K02895+K02895+K02895+K02899+K02899+K02899+K02899+K02902+K02902+…	https:\\www.genome.jp\dbget-bin\www_bget?map03010
Proteasome	ko03050	16 out of 5970 0.268006700167504%	380 out of 32833 1.1573721560625%	1	1	BnaA07G0162800ZS;BnaC03G0274300ZS;BnaC04G0196100ZS;BnaC04G0484800ZS;BnaC04G0019100ZS;BnaC08G0315300ZS;BnaC08G0395000ZS;BnaA01G0007700ZS;BnaA03G0166400ZS;BnaA09G0477600ZS;BnaA09G0548700ZS;BnaC05G0174900ZS;BnaC03G0035600ZS;BnaC09G0187700ZS;BnaA09G0168200ZS;BnaC06G0300600ZS	K02725+K02725+K02725+K02725+K02728+K03029+K03029+K03029+K03029+K03029+K03029+K03029+K03038+K06699+K06699+K06699	https:\\www.genome.jp\dbget-bin\www_bget?map03050
Protein processing in endoplasmic reticulum	ko04141	115 out of 5970 1.92629815745394%	1211 out of 32833 3.68836231839917%	1	1	BnaA07G0101300ZS;BnaC07G0153200ZS;BnaC09G0184500ZS;BnaC09G0185100ZS;BnaC09G0185400ZS;BnaA09G0166000ZS;BnaA09G0166200ZS;BnaC01G0335400ZS;BnaC04G0280900ZS;novel.7534;BnaC04G0573600ZS;BnaA03G0479600ZS;BnaA06G0148400ZS;BnaA07G0129900ZS;BnaA08G0176100ZS;BnaA09G0694100ZS;BnaC01G0457500ZS;BnaC05G0179900ZS;BnaC05G0431600ZS;BnaC07G0377000ZS;novel.4681;novel.6107;novel.8859;novel.9097;novel.1098;novel.332;…	K01228+K01228+K01456+K01456+K01456+K01456+K01456+K01456+K03094+K03094+K03237+K03283+K03283+K03283+K03283+K03283+K03283+K03283+K03283+K03283+K03283+K03283+K03283+K03283+K03283+K03283+K04079+K04079+K04079+K04374+K04374+K04374+K04374+K04374+K04523+K05546+K06689+K06689+K06689+K06689+K06689+K06689+K07953+K07953+K08852+K09481+K09487+K09487+K09487+K09487+K09487+K09487+K09487+K09487+K09503+K09517+K09517+…	https:\\www.genome.jp\dbget-bin\www_bget?map04141
Spliceosome	ko03040	87 out of 5970 1.4572864321608%	1228 out of 32833 3.74013949380197%	1	1	BnaA03G0479600ZS;BnaA06G0148400ZS;BnaA07G0129900ZS;BnaA08G0176100ZS;BnaA09G0694100ZS;BnaC01G0457500ZS;BnaC05G0179900ZS;BnaC05G0431600ZS;BnaC07G0377000ZS;novel.4681;novel.6107;novel.8859;novel.9097;novel.1098;novel.332;BnaC08G0290700ZS;BnaA02G0340900ZS;BnaA02G0341000ZS;BnaA04G0122400ZS;BnaA10G0081200ZS;BnaC04G0410400ZS;novel.9850;BnaC06G0361600ZS;BnaC02G0264700ZS;novel.4759;BnaA10G0219600ZS;BnaC03…	K03283+K03283+K03283+K03283+K03283+K03283+K03283+K03283+K03283+K03283+K03283+K03283+K03283+K03283+K03283+K11094+K11094+K11094+K11094+K11094+K11094+K11094+K11096+K12741+K12811+K12818+K12818+K12821+K12821+K12823+K12823+K12823+K12825+K12833+K12835+K12835+K12835+K12835+K12835+K12835+K12835+K12835+K12835+K12835+K12835+K12835+K12835+K12835+K12835+K12835+K12835+K12835+K12836+K12839+K12842+K12842+K12842+…	https:\\www.genome.jp\dbget-bin\www_bget?map03040

## Sheet: Sheet4
#KEGG_pathway	ko_id	Cluster_frequency	Genome_frequency	P-value	Corrected_P-value	GeneID	KEGG Orthology	hyperlink
Nitrogen metabolism	ko00910	23 out of 578 3.97923875432526%	181 out of 32833 0.551274632229769%	5.85421e-13	6.84942e-11	BnaA01G0405900ZS;BnaC01G0508900ZS;BnaA02G0187600ZS;BnaA06G0043600ZS;BnaC06G0024500ZS;BnaC06G0369600ZS;BnaC09G0498800ZS;BnaA07G0182800ZS;BnaA10G0200900ZS;BnaC02G0075000ZS;BnaC08G0220400ZS;BnaC08G0532800ZS;BnaC09G0443000ZS;BnaA06G0047500ZS;BnaA06G0047600ZS;BnaA08G0276500ZS;BnaA08G0300800ZS;BnaA09G0667800ZS;BnaC05G0059500ZS;BnaC05G0059600ZS;BnaC08G0033200ZS;BnaC08G0033300ZS;BnaA07G0237900ZS	K00261+K00261+K01673+K01673+K01673+K01673+K01915+K01915+K01915+K01915+K02575+K02575+K02575+K02575+K02575+K02575+K02575+K02575+K02575+K02575+K02575+K02575+K10534	https:\\www.genome.jp\dbget-bin\www_bget?map00910
Plant-pathogen interaction	ko04626	97 out of 578 16.7820069204152%	2759 out of 32833 8.40313099625377%	3.73027e-11	4.36442e-09	BnaC06G0161900ZS;novel.2270;BnaA03G0276700ZS;BnaA04G0270000ZS;BnaA07G0384200ZS;BnaA08G0312600ZS;BnaC03G0333700ZS;BnaC03G0424500ZS;BnaC03G0424700ZS;BnaC03G0424800ZS;BnaC04G0015400ZS;BnaC04G0587300ZS;BnaC05G0182300ZS;BnaC06G0247900ZS;BnaC07G0190300ZS;novel.1366;novel.3004;novel.985;BnaA01G0092200ZS;BnaA09G0036200ZS;novel.770;BnaC08G0435000ZS;BnaA07G0234200ZS;BnaC09G0512100ZS;BnaA02G0057600ZS;BnaA10…	K02183+K02358+K05391+K05391+K05391+K05391+K05391+K05391+K05391+K05391+K05391+K05391+K05391+K05391+K05391+K05391+K05391+K13413+K13416+K13416+K13416+K13420+K13420+K13424+K13424+K13424+K13424+K13424+K13424+K13425+K13426+K13426+K13426+K13426+K13429+K13429+K13430+K13430+K13430+K13430+K13448+K13448+K13448+K13448+K13448+K13448+K13448+K13448+K13449+K13449+K13449+K13449+K13449+K13456+K13459+K16224+K16224+…	https:\\www.genome.jp\dbget-bin\www_bget?map04626
Phenylpropanoid biosynthesis	ko00940	49 out of 578 8.47750865051903%	1067 out of 32833 3.24977918557549%	1.33918e-09	1.56684e-07	BnaC09G0464400ZS;BnaA02G0147900ZS;BnaA03G0291800ZS;BnaA03G0536800ZS;BnaA04G0246800ZS;BnaA07G0035700ZS;BnaA08G0031000ZS;BnaA09G0094600ZS;BnaA10G0176900ZS;BnaC03G0350800ZS;BnaC04G0230600ZS;BnaC04G0562000ZS;BnaC05G0563600ZS;BnaC07G0062800ZS;BnaC07G0216500ZS;BnaC07G0468200ZS;BnaC07G0513600ZS;BnaC08G0037400ZS;novel.1215;novel.1022;BnaA04G0196700ZS;BnaC04G0500400ZS;BnaC08G0393400ZS;BnaC08G0393700ZS;Bna…	K00430+K00430+K00430+K00430+K00430+K00430+K00430+K00430+K00430+K00430+K00430+K00430+K00430+K00430+K00430+K00430+K00430+K00430+K00430+K00430+K00487+K00487+K01188+K01188+K01188+K01188+K01188+K01188+K01188+K01188+K01188+K01188+K01904+K05350+K06892+K09753+K09755+K12356+K12356+K12356+K12356+K13065+K13065+K13065+K13066+K13066+K13068+K22395+K22395	https:\\www.genome.jp\dbget-bin\www_bget?map00940
MAPK signaling pathway - plant	ko04016	63 out of 578 10.8996539792388%	1847 out of 32833 5.62543782170377%	4.47503e-07	5.23579e-05	BnaC06G0161900ZS;BnaC08G0260800ZS;novel.985;BnaA01G0092200ZS;BnaA09G0036200ZS;novel.770;BnaC08G0435000ZS;BnaA07G0234200ZS;BnaC03G0274900ZS;BnaC09G0512100ZS;BnaA02G0057600ZS;BnaA10G0211300ZS;BnaC02G0066900ZS;BnaC03G0070800ZS;BnaC03G0312700ZS;BnaC02G0325000ZS;BnaC09G0446700ZS;BnaA01G0132000ZS;BnaA08G0130000ZS;BnaC03G0735700ZS;BnaC01G0049200ZS;BnaC03G0486800ZS;novel.1398;novel.8882;novel.1519;BnaA03…	K02183+K03781+K13413+K13416+K13416+K13416+K13420+K13420+K13422+K13424+K13424+K13424+K13424+K13424+K13424+K13425+K13426+K13426+K13426+K13426+K13449+K13449+K13449+K13449+K13449+K14497+K14497+K14497+K14497+K14497+K14498+K14498+K14498+K16224+K16224+K16224+K16224+K16224+K16224+K16224+K16224+K16224+K16224+K16224+K16224+K16224+K16224+K16224+K16224+K20559+K20559+K20559+K20599+K20606+K20606+K20606+K20606+…	https:\\www.genome.jp\dbget-bin\www_bget?map04016
Glutathione metabolism	ko00480	25 out of 578 4.32525951557093%	479 out of 32833 1.45889805987878%	1.71967e-06	0.000201201	BnaC09G0011200ZS;BnaA02G0184900ZS;BnaA03G0270600ZS;BnaA05G0140500ZS;BnaA07G0269100ZS;BnaA07G0314000ZS;BnaA09G0026400ZS;BnaA09G0103700ZS;BnaC02G0244200ZS;BnaC02G0244300ZS;BnaC02G0283300ZS;BnaC03G0324900ZS;BnaC04G0184800ZS;BnaC04G0185400ZS;BnaC05G0546700ZS;BnaC06G0255600ZS;BnaC06G0303400ZS;BnaC06G0365100ZS;BnaC06G0365200ZS;novel.8942;BnaA03G0218600ZS;BnaC07G0488400ZS;BnaC09G0050100ZS;BnaA09G0061600…	K00799+K00799+K00799+K00799+K00799+K00799+K00799+K00799+K00799+K00799+K00799+K00799+K00799+K00799+K00799+K00799+K00799+K00799+K00799+K00799+K01255+K18592+K22596+K22596+K22596	https:\\www.genome.jp\dbget-bin\www_bget?map00480
Alanine, aspartate and glutamate metabolism	ko00250	18 out of 578 3.11418685121107%	291 out of 32833 0.88630341424786%	4.91654e-06	0.000575235	BnaA01G0405900ZS;BnaC01G0508900ZS;novel.1320;BnaC09G0104800ZS;BnaA09G0104000ZS;BnaA09G0220100ZS;BnaC09G0498800ZS;BnaA07G0182800ZS;BnaA10G0200900ZS;BnaC02G0075000ZS;BnaA01G0348500ZS;BnaA06G0015600ZS;BnaA06G0177300ZS;BnaA06G0259500ZS;BnaA08G0167300ZS;BnaC09G0570200ZS;BnaA05G0393500ZS;BnaC05G0440300ZS	K00261+K00261+K00827+K00830+K00830+K01580+K01915+K01915+K01915+K01915+K01953+K01953+K01953+K01953+K01953+K13051+K13051+K13051	https:\\www.genome.jp\dbget-bin\www_bget?map00250
Glucosinolate biosynthesis	ko00966	11 out of 578 1.90311418685121%	123 out of 32833 0.37462309262023%	1.19249e-05	0.00139521	BnaA02G0158700ZS;BnaC03G0780900ZS;BnaA01G0008700ZS;BnaA03G0567100ZS;BnaC03G0681300ZS;BnaC07G0541500ZS;BnaA04G0145000ZS;BnaC04G0436200ZS;BnaA02G0257100ZS;BnaC02G0347600ZS;BnaA03G0359600ZS	K00826+K00826+K11812+K11812+K11812+K11812+K11813+K11813+K15741+K15741+K21346	https:\\www.genome.jp\dbget-bin\www_bget?map00966
Biosynthesis of secondary metabolites	ko01110	167 out of 578 28.8927335640138%	7179 out of 32833 21.8651966009807%	3.91046e-05	0.00457524	BnaA02G0263300ZS;BnaA04G0103200ZS;BnaA06G0368500ZS;BnaC04G0377900ZS;BnaC09G0464400ZS;BnaA02G0147900ZS;BnaA03G0291800ZS;BnaA03G0536800ZS;BnaA04G0246800ZS;BnaA07G0035700ZS;BnaA08G0031000ZS;BnaA09G0094600ZS;BnaA10G0176900ZS;BnaC03G0350800ZS;BnaC04G0230600ZS;BnaC04G0562000ZS;BnaC05G0563600ZS;BnaC07G0062800ZS;BnaC07G0216500ZS;BnaC07G0468200ZS;BnaC07G0513600ZS;BnaC08G0037400ZS;novel.1215;novel.1022;Bna…	K00276+K00318+K00318+K00318+K00430+K00430+K00430+K00430+K00430+K00430+K00430+K00430+K00430+K00430+K00430+K00430+K00430+K00430+K00430+K00430+K00430+K00430+K00430+K00430+K00487+K00487+K00511+K00511+K00511+K00511+K00511+K00549+K00640+K00688+K00695+K00695+K00696+K00815+K00815+K00815+K00815+K00826+K00826+K00827+K00830+K00830+K00963+K00975+K00975+K00981+K00981+K00993+K00993+K00993+K01006+K01115+K01115+…	https:\\www.genome.jp\dbget-bin\www_bget?map01110
Metabolic pathways	ko01100	286 out of 578 49.4809688581315%	13753 out of 32833 41.8877349008619%	0.000121577	0.0142245	BnaA01G0405900ZS;BnaC01G0508900ZS;BnaA02G0263300ZS;BnaA04G0103200ZS;BnaA06G0368500ZS;BnaC04G0377900ZS;BnaA09G0645700ZS;novel.5166;BnaC09G0464400ZS;BnaA02G0147900ZS;BnaA03G0291800ZS;BnaA03G0536800ZS;BnaA04G0246800ZS;BnaA07G0035700ZS;BnaA08G0031000ZS;BnaA09G0094600ZS;BnaA10G0176900ZS;BnaC03G0350800ZS;BnaC04G0230600ZS;BnaC04G0562000ZS;BnaC05G0563600ZS;BnaC07G0062800ZS;BnaC07G0216500ZS;BnaC07G0468200…	K00261+K00261+K00276+K00318+K00318+K00318+K00423+K00423+K00430+K00430+K00430+K00430+K00430+K00430+K00430+K00430+K00430+K00430+K00430+K00430+K00430+K00430+K00430+K00430+K00430+K00430+K00430+K00430+K00469+K00469+K00469+K00487+K00487+K00511+K00511+K00511+K00511+K00511+K00549+K00640+K00679+K00679+K00688+K00695+K00695+K00696+K00799+K00799+K00799+K00799+K00799+K00799+K00799+K00799+K00799+K00799+K00799+…	https:\\www.genome.jp\dbget-bin\www_bget?map01100
Inositol phosphate metabolism	ko00562	20 out of 578 3.46020761245675%	458 out of 32833 1.39493801967533%	0.000211644	0.0247624	BnaA03G0491300ZS;BnaA09G0123600ZS;BnaC07G0469700ZS;BnaC08G0201200ZS;BnaC08G0201500ZS;BnaA03G0124300ZS;BnaA09G0033300ZS;BnaA08G0139900ZS;BnaA02G0319000ZS;BnaC02G0430600ZS;BnaA04G0041000ZS;BnaC04G0315300ZS;BnaA10G0142800ZS;BnaA06G0343800ZS;BnaA02G0406500ZS;BnaC08G0473500ZS;BnaC08G0473600ZS;BnaA09G0618300ZS;BnaA03G0444600ZS;BnaC04G0555500ZS	K00469+K00469+K00469+K00889+K00889+K00889+K00889+K00913+K01099+K01099+K01803+K01803+K05857+K10572+K15422+K22913+K22913+K22913+K24221+K24221	https:\\www.genome.jp\dbget-bin\www_bget?map00562
Cyanoamino acid metabolism	ko00460	16 out of 578 2.7681660899654%	331 out of 32833 1.00813206225444%	0.00029412	0.034412	BnaC08G0393400ZS;BnaC08G0393700ZS;BnaA05G0419800ZS;BnaA09G0547100ZS;BnaA09G0547400ZS;BnaC04G0050900ZS;BnaC04G0260400ZS;BnaC04G0279200ZS;BnaC05G0016100ZS;novel.107;BnaA01G0283500ZS;BnaC09G0570200ZS;BnaA05G0393500ZS;BnaC05G0440300ZS;BnaC07G0488400ZS;BnaC05G0406400ZS	K01188+K01188+K01188+K01188+K01188+K01188+K01188+K01188+K01188+K01188+K05350+K13051+K13051+K13051+K18592+K20802	https:\\www.genome.jp\dbget-bin\www_bget?map00460
Tryptophan metabolism	ko00380	20 out of 578 3.46020761245675%	476 out of 32833 1.44976091127829%	0.000347752	0.040687	novel.2026;BnaA01G0034100ZS;BnaA01G0034200ZS;BnaC08G0260800ZS;BnaA01G0008700ZS;BnaA03G0567100ZS;BnaC03G0681300ZS;BnaC07G0541500ZS;BnaA04G0145000ZS;BnaC04G0436200ZS;BnaC05G0025300ZS;BnaA06G0331000ZS;BnaC07G0363100ZS;BnaC01G0219200ZS;BnaC07G0478100ZS;novel.6232;novel.8954;novel.868;BnaA06G0016500ZS;BnaC06G0070900ZS	K01237+K01426+K01426+K03781+K11812+K11812+K11812+K11812+K11813+K11813+K11816+K11868+K11868+K13066+K13066+K14085+K14085+K14085+K23947+K23947	https:\\www.genome.jp\dbget-bin\www_bget?map00380
ABC transporters	ko02010	16 out of 578 2.7681660899654%	356 out of 32833 1.08427496725855%	0.000649117	0.0759467	BnaA01G0227000ZS;BnaA07G0067800ZS;BnaC01G0290400ZS;BnaC07G0102000ZS;BnaC08G0164700ZS;BnaC08G0164800ZS;BnaA08G0173500ZS;BnaC07G0324400ZS;novel.3567;BnaA01G0364200ZS;BnaA05G0420700ZS;BnaA09G0409700ZS;BnaC01G0452500ZS;BnaC01G0454700ZS;BnaC05G0472700ZS;BnaC03G0398500ZS	K05643+K05643+K05643+K05643+K05658+K05658+K05658+K05658+K05658+K05665+K05665+K05665+K05665+K05665+K05665+K05666	https:\\www.genome.jp\dbget-bin\www_bget?map02010
Isoquinoline alkaloid biosynthesis	ko00950	11 out of 578 1.90311418685121%	227 out of 32833 0.691377577437334%	0.00244839	0.286462	BnaA02G0263300ZS;BnaA03G0473600ZS;BnaA09G0578100ZS;BnaC06G0001700ZS;BnaC07G0451900ZS;BnaC08G0274600ZS;BnaA07G0118200ZS;BnaC02G0254800ZS;BnaC07G0175300ZS;BnaA01G0047700ZS;BnaC02G0227600ZS	K00276+K00815+K00815+K00815+K00815+K01742+K01742+K01742+K01742+K13384+K22097	https:\\www.genome.jp\dbget-bin\www_bget?map00950
2-Oxocarboxylic acid metabolism	ko01210	13 out of 578 2.24913494809689%	349 out of 32833 1.0629549538574%	0.00952383	1	BnaA02G0158700ZS;BnaC03G0780900ZS;novel.7232;novel.7233;BnaA01G0008700ZS;BnaA03G0567100ZS;BnaC03G0681300ZS;BnaC07G0541500ZS;BnaA04G0145000ZS;BnaC04G0436200ZS;BnaA02G0257100ZS;BnaC02G0347600ZS;BnaA03G0359600ZS	K00826+K00826+K01653+K01653+K11812+K11812+K11812+K11812+K11813+K11813+K15741+K15741+K21346	https:\\www.genome.jp\dbget-bin\www_bget?map01210
Tropane, piperidine and pyridine alkaloid biosynthesis	ko00960	9 out of 578 1.55709342560554%	215 out of 32833 0.654828983035361%	0.0144333	1	BnaA02G0263300ZS;BnaA03G0473600ZS;BnaA09G0578100ZS;BnaC06G0001700ZS;BnaC07G0451900ZS;BnaC09G0220000ZS;BnaA04G0189600ZS;BnaA05G0140700ZS;BnaC04G0493000ZS	K00276+K00815+K00815+K00815+K00815+K08081+K08081+K08081+K08081	https:\\www.genome.jp\dbget-bin\www_bget?map00960
Ubiquinone and other terpenoid-quinone biosynthesis	ko00130	9 out of 578 1.55709342560554%	224 out of 32833 0.682240428836841%	0.0183474	1	BnaA04G0196700ZS;BnaC04G0500400ZS;BnaA03G0473600ZS;BnaA09G0578100ZS;BnaC06G0001700ZS;BnaC07G0451900ZS;BnaC05G0371900ZS;BnaC08G0249400ZS;BnaA02G0212800ZS	K00487+K00487+K00815+K00815+K00815+K00815+K01904+K02552+K02552	https:\\www.genome.jp\dbget-bin\www_bget?map00130
Galactose metabolism	ko00052	17 out of 578 2.94117647058824%	562 out of 32833 1.71169250449243%	0.0226826	1	Bnascaffold0511G0000100ZS;BnaA02G0305300ZS;BnaA05G0413300ZS;BnaA10G0231900ZS;BnaC03G0054500ZS;BnaC05G0465400ZS;novel.4494;novel.10092;BnaA02G0084600ZS;BnaC02G0100500ZS;BnaC09G0444300ZS;BnaA09G0434700ZS;BnaA09G0708200ZS;BnaC03G0131700ZS;BnaC03G0632800ZS;BnaC09G0187100ZS;BnaA09G0167700ZS	K00963+K01193+K01193+K01193+K01193+K01193+K01193+K01193+K06617+K06617+K12309+K12309+K12309+K12309+K12309+K18819+K18819	https:\\www.genome.jp\dbget-bin\www_bget?map00052
Sesquiterpenoid and triterpenoid biosynthesis	ko00909	6 out of 578 1.03806228373702%	125 out of 32833 0.380714525020559%	0.023513	1	BnaA02G0387500ZS;BnaA02G0387600ZS;BnaA04G0056500ZS;BnaC02G0518400ZS;BnaC04G0353700ZS;BnaC09G0479400ZS	K00511+K00511+K00511+K00511+K00511+K15799	https:\\www.genome.jp\dbget-bin\www_bget?map00909
Ether lipid metabolism	ko00565	6 out of 578 1.03806228373702%	144 out of 32833 0.438583132823683%	0.0425219	1	BnaC08G0224200ZS;BnaC08G0497500ZS;BnaA08G0274600ZS;BnaA01G0396500ZS;BnaC03G0307200ZS;BnaC03G0307300ZS	K00993+K00993+K00993+K01115+K01115+K01115	https:\\www.genome.jp\dbget-bin\www_bget?map00565
Selenocompound metabolism	ko00450	6 out of 578 1.03806228373702%	145 out of 32833 0.441628849023848%	0.0437279	1	BnaA01G0394400ZS;BnaA08G0089800ZS;BnaC06G0166900ZS;BnaC08G0128300ZS;BnaC05G0549700ZS;BnaC02G0068300ZS	K00384+K00384+K00384+K00384+K00549+K01739	https:\\www.genome.jp\dbget-bin\www_bget?map00450
Stilbenoid, diarylheptanoid and gingerol biosynthesis	ko00945	5 out of 578 0.865051903114187%	113 out of 32833 0.344165930618585%	0.0497912	1	BnaA04G0196700ZS;BnaC04G0500400ZS;BnaA07G0379300ZS;BnaA09G0432100ZS;BnaC06G0446000ZS	K00487+K00487+K13065+K13065+K13065	https:\\www.genome.jp\dbget-bin\www_bget?map00945
Plant hormone signal transduction	ko04075	50 out of 578 8.65051903114187%	2271 out of 32833 6.91682149057351%	0.0611854	1	BnaC04G0455600ZS;novel.985;BnaA04G0218300ZS;BnaA01G0092200ZS;BnaA09G0036200ZS;novel.770;BnaC03G0274900ZS;BnaC01G0049200ZS;BnaC03G0486800ZS;novel.1398;novel.8882;novel.1519;BnaA07G0249100ZS;BnaA09G0610300ZS;BnaC03G0060300ZS;BnaC08G0531400ZS;BnaC09G0579800ZS;BnaA10G0264600ZS;BnaC03G0031300ZS;BnaC05G0062000ZS;BnaC09G0527400ZS;BnaC02G0054500ZS;novel.4491;novel.5803;novel.700;novel.1083;BnaA05G0391500…	K12126+K13413+K13415+K13416+K13416+K13416+K13422+K13449+K13449+K13449+K13449+K13449+K13464+K13464+K13464+K14431+K14431+K14431+K14431+K14431+K14487+K14487+K14487+K14487+K14487+K14487+K14490+K14493+K14493+K14493+K14493+K14494+K14494+K14494+K14494+K14494+K14494+K14494+K14494+K14494+K14494+K14497+K14497+K14497+K14497+K14497+K14498+K14498+K14498+K14500	https:\\www.genome.jp\dbget-bin\www_bget?map04075
Phosphonate and phosphinate metabolism	ko00440	3 out of 578 0.519031141868512%	52 out of 32833 0.158377242408552%	0.0636492	1	BnaC08G0224200ZS;BnaC08G0497500ZS;BnaA08G0274600ZS	K00993+K00993+K00993	https:\\www.genome.jp\dbget-bin\www_bget?map00440
Steroid biosynthesis	ko00100	6 out of 578 1.03806228373702%	166 out of 32833 0.505588889227302%	0.0740206	1	BnaA02G0387500ZS;BnaA02G0387600ZS;BnaA04G0056500ZS;BnaC02G0518400ZS;BnaC04G0353700ZS;BnaA05G0100300ZS	K00511+K00511+K00511+K00511+K00511+K09832	https:\\www.genome.jp\dbget-bin\www_bget?map00100
Phosphatidylinositol signaling system	ko04070	13 out of 578 2.24913494809689%	471 out of 32833 1.43453233027746%	0.0755766	1	BnaC08G0201200ZS;BnaC08G0201500ZS;BnaA03G0124300ZS;BnaA09G0033300ZS;BnaA08G0139900ZS;BnaA01G0161800ZS;BnaC01G0206900ZS;BnaA02G0319000ZS;BnaC02G0430600ZS;BnaC06G0161900ZS;BnaA10G0142800ZS;BnaA06G0343800ZS;BnaA02G0406500ZS	K00889+K00889+K00889+K00889+K00913+K00981+K00981+K01099+K01099+K02183+K05857+K10572+K15422	https:\\www.genome.jp\dbget-bin\www_bget?map04070
Nicotinate and nicotinamide metabolism	ko00760	5 out of 578 0.865051903114187%	130 out of 32833 0.395943106021381%	0.0802573	1	BnaA10G0184800ZS;BnaA07G0296500ZS;BnaA01G0200600ZS;BnaC08G0410300ZS;BnaA09G0561700ZS	K01240+K03517+K03787+K18551+K18551	https:\\www.genome.jp\dbget-bin\www_bget?map00760
Glycosaminoglycan degradation	ko00531	6 out of 578 1.03806228373702%	172 out of 32833 0.523863186428289%	0.0844253	1	BnaC07G0379900ZS;BnaC09G0444300ZS;BnaA09G0434700ZS;BnaA09G0708200ZS;BnaC03G0131700ZS;BnaC03G0632800ZS	K07964+K12309+K12309+K12309+K12309+K12309	https:\\www.genome.jp\dbget-bin\www_bget?map00531
Arginine biosynthesis	ko00220	6 out of 578 1.03806228373702%	176 out of 32833 0.536046051228946%	0.091788	1	BnaA01G0405900ZS;BnaC01G0508900ZS;BnaC09G0498800ZS;BnaA07G0182800ZS;BnaA10G0200900ZS;BnaC02G0075000ZS	K00261+K00261+K01915+K01915+K01915+K01915	https:\\www.genome.jp\dbget-bin\www_bget?map00220
Glycerolipid metabolism	ko00561	15 out of 578 2.59515570934256%	588 out of 32833 1.79088112569671%	0.0991594	1	BnaA05G0187800ZS;BnaC06G0082200ZS;BnaA07G0255600ZS;BnaC09G0104000ZS;BnaA02G0085500ZS;BnaC02G0101600ZS;BnaC09G0621600ZS;BnaA01G0034300ZS;BnaA10G0300600ZS;BnaA10G0300700ZS;BnaC01G0126000ZS;novel.6232;novel.8954;novel.868;BnaC06G0457600ZS	K00679+K00679+K01054+K03715+K03715+K03715+K06119+K06119+K06119+K06119+K06119+K14085+K14085+K14085+K15918	https:\\www.genome.jp\dbget-bin\www_bget?map00561
Biosynthesis of amino acids	ko01230	29 out of 578 5.01730103806228%	1288 out of 32833 3.92288246581184%	0.106728	1	BnaC05G0549700ZS;BnaC06G0142700ZS;BnaA02G0158700ZS;BnaC03G0780900ZS;BnaC05G0064400ZS;novel.4260;BnaA06G0449300ZS;BnaA08G0198600ZS;novel.7276;novel.7232;novel.7233;BnaA09G0553300ZS;BnaA02G0370200ZS;BnaC02G0496100ZS;BnaC02G0068300ZS;BnaA04G0041000ZS;BnaC04G0315300ZS;BnaC09G0498800ZS;BnaA07G0182800ZS;BnaA10G0200900ZS;BnaC02G0075000ZS;BnaA01G0348500ZS;BnaA06G0015600ZS;BnaA06G0177300ZS;BnaA06G0259500Z…	K00549+K00640+K00826+K00826+K01620+K01620+K01623+K01623+K01623+K01653+K01653+K01714+K01738+K01738+K01739+K01803+K01803+K01915+K01915+K01915+K01915+K01953+K01953+K01953+K01953+K01953+K10206+K14152+K14152	https:\\www.genome.jp\dbget-bin\www_bget?map01230
Flavonoid biosynthesis	ko00941	7 out of 578 1.21107266435986%	233 out of 32833 0.709651874638321%	0.118951	1	BnaA04G0196700ZS;BnaC04G0500400ZS;BnaA01G0107500ZS;BnaA02G0020400ZS;BnaA07G0379300ZS;BnaA09G0432100ZS;BnaC06G0446000ZS	K00487+K00487+K01859+K05278+K13065+K13065+K13065	https:\\www.genome.jp\dbget-bin\www_bget?map00941
Phenylalanine metabolism	ko00360	7 out of 578 1.21107266435986%	233 out of 32833 0.709651874638321%	0.118951	1	BnaA02G0263300ZS;BnaA03G0473600ZS;BnaA09G0578100ZS;BnaC06G0001700ZS;BnaC07G0451900ZS;BnaA01G0034100ZS;BnaA01G0034200ZS	K00276+K00815+K00815+K00815+K00815+K01426+K01426	https:\\www.genome.jp\dbget-bin\www_bget?map00360
Glycosphingolipid biosynthesis - ganglio series	ko00604	5 out of 578 0.865051903114187%	153 out of 32833 0.465994578625164%	0.133929	1	BnaC09G0444300ZS;BnaA09G0434700ZS;BnaA09G0708200ZS;BnaC03G0131700ZS;BnaC03G0632800ZS	K12309+K12309+K12309+K12309+K12309	https:\\www.genome.jp\dbget-bin\www_bget?map00604
Glycerophospholipid metabolism	ko00564	15 out of 578 2.59515570934256%	622 out of 32833 1.8944354765023%	0.138276	1	BnaA01G0161800ZS;BnaC01G0206900ZS;BnaC08G0224200ZS;BnaC08G0497500ZS;BnaA08G0274600ZS;BnaA01G0396500ZS;BnaC03G0307200ZS;BnaC03G0307300ZS;BnaA03G0279200ZS;BnaC02G0333400ZS;BnaC03G0336200ZS;BnaA01G0421800ZS;BnaC01G0493900ZS;BnaC04G0603100ZS;BnaC08G0058300ZS	K00981+K00981+K00993+K00993+K00993+K01115+K01115+K01115+K01613+K01613+K01613+K18696+K18696+K18696+K18696	https:\\www.genome.jp\dbget-bin\www_bget?map00564
Valine, leucine and isoleucine biosynthesis	ko00290	4 out of 578 0.692041522491349%	117 out of 32833 0.356348795419243%	0.151925	1	BnaA02G0158700ZS;BnaC03G0780900ZS;novel.7232;novel.7233	K00826+K00826+K01653+K01653	https:\\www.genome.jp\dbget-bin\www_bget?map00290
Cysteine and methionine metabolism	ko00270	14 out of 578 2.42214532871972%	594 out of 32833 1.80915542289769%	0.167269	1	BnaC05G0549700ZS;BnaC06G0142700ZS;BnaA03G0473600ZS;BnaA09G0578100ZS;BnaC06G0001700ZS;BnaC07G0451900ZS;BnaA02G0158700ZS;BnaC03G0780900ZS;novel.1320;BnaA02G0370200ZS;BnaC02G0496100ZS;BnaC02G0068300ZS;BnaA10G0005000ZS;BnaC05G0007100ZS	K00549+K00640+K00815+K00815+K00815+K00815+K00826+K00826+K00827+K01738+K01738+K01739+K20772+K20772	https:\\www.genome.jp\dbget-bin\www_bget?map00270
C5-Branched dibasic acid metabolism	ko00660	2 out of 578 0.346020761245675%	43 out of 32833 0.130965796607072%	0.174992	1	novel.7232;novel.7233	K01653+K01653	https:\\www.genome.jp\dbget-bin\www_bget?map00660
Folate biosynthesis	ko00790	4 out of 578 0.692041522491349%	129 out of 32833 0.392897389821216%	0.193158	1	BnaC02G0022200ZS;BnaA03G0241400ZS;BnaC09G0227800ZS;BnaA09G0197300ZS	K01930+K13998+K15631+K15631	https:\\www.genome.jp\dbget-bin\www_bget?map00790
Starch and sucrose metabolism	ko00500	28 out of 578 4.84429065743945%	1342 out of 32833 4.08735114062072%	0.202679	1	BnaA07G0240400ZS;BnaC09G0160500ZS;BnaC03G0668000ZS;BnaA02G0084800ZS;Bnascaffold0511G0000100ZS;BnaC03G0031000ZS;BnaC04G0572700ZS;BnaC07G0198500ZS;BnaC08G0393400ZS;BnaC08G0393700ZS;BnaA05G0419800ZS;BnaA09G0547100ZS;BnaA09G0547400ZS;BnaC04G0050900ZS;BnaC04G0260400ZS;BnaC04G0279200ZS;BnaC05G0016100ZS;novel.107;BnaA02G0305300ZS;BnaA05G0413300ZS;BnaA10G0231900ZS;BnaC03G0054500ZS;BnaC05G0465400ZS;novel.…	K00688+K00695+K00695+K00696+K00963+K00975+K00975+K01179+K01188+K01188+K01188+K01188+K01188+K01188+K01188+K01188+K01188+K01188+K01193+K01193+K01193+K01193+K01193+K01193+K01193+K05350+K07024+K07024	https:\\www.genome.jp\dbget-bin\www_bget?map00500
Tyrosine metabolism	ko00350	6 out of 578 1.03806228373702%	229 out of 32833 0.697469009837663%	0.217879	1	BnaA02G0263300ZS;BnaA03G0473600ZS;BnaA09G0578100ZS;BnaC06G0001700ZS;BnaC07G0451900ZS;BnaC09G0257500ZS	K00276+K00815+K00815+K00815+K00815+K01800	https:\\www.genome.jp\dbget-bin\www_bget?map00350
Histidine metabolism	ko00340	5 out of 578 0.865051903114187%	182 out of 32833 0.554320348429933%	0.218418	1	novel.6232;novel.8954;novel.868;BnaC09G0036600ZS;BnaA09G0050500ZS	K14085+K14085+K14085+K14152+K14152	https:\\www.genome.jp\dbget-bin\www_bget?map00340
Sulfur metabolism	ko00920	5 out of 578 0.865051903114187%	182 out of 32833 0.554320348429933%	0.218418	1	BnaC06G0142700ZS;BnaA02G0370200ZS;BnaC02G0496100ZS;BnaC02G0068300ZS;BnaA02G0406500ZS	K00640+K01738+K01738+K01739+K15422	https:\\www.genome.jp\dbget-bin\www_bget?map00920
Taurine and hypotaurine metabolism	ko00430	2 out of 578 0.346020761245675%	52 out of 32833 0.158377242408552%	0.232848	1	BnaA09G0220100ZS;BnaC07G0488400ZS	K01580+K18592	https:\\www.genome.jp\dbget-bin\www_bget?map00430
Glycine, serine and threonine metabolism	ko00260	10 out of 578 1.73010380622837%	450 out of 32833 1.37057229007401%	0.271611	1	BnaA02G0263300ZS;novel.1320;BnaC09G0104800ZS;BnaA09G0104000ZS;BnaC05G0064400ZS;novel.4260;novel.6232;novel.8954;novel.868;BnaC06G0457600ZS	K00276+K00827+K00830+K00830+K01620+K01620+K14085+K14085+K14085+K15918	https:\\www.genome.jp\dbget-bin\www_bget?map00260
Arginine and proline metabolism	ko00330	9 out of 578 1.55709342560554%	415 out of 32833 1.26397222306825%	0.310093	1	BnaA04G0103200ZS;BnaA06G0368500ZS;BnaC04G0377900ZS;BnaA01G0034100ZS;BnaA01G0034200ZS;novel.6232;novel.8954;novel.868;BnaC07G0321100ZS	K00318+K00318+K00318+K01426+K01426+K14085+K14085+K14085+K14329	https:\\www.genome.jp\dbget-bin\www_bget?map00330
Butanoate metabolism	ko00650	3 out of 578 0.519031141868512%	117 out of 32833 0.356348795419243%	0.339634	1	BnaA09G0220100ZS;novel.7232;novel.7233	K01580+K01653+K01653	https:\\www.genome.jp\dbget-bin\www_bget?map00650
Riboflavin metabolism	ko00740	3 out of 578 0.519031141868512%	120 out of 32833 0.365485944019736%	0.354056	1	BnaA01G0331700ZS;BnaA05G0381600ZS;BnaC05G0425800ZS	K14379+K14379+K14379	https:\\www.genome.jp\dbget-bin\www_bget?map00740
Valine, leucine and isoleucine degradation	ko00280	7 out of 578 1.21107266435986%	340 out of 32833 1.03554350805592%	0.391305	1	BnaA02G0158700ZS;BnaC03G0780900ZS;novel.1320;BnaA07G0330500ZS;novel.6232;novel.8954;novel.868	K00826+K00826+K00827+K01968+K14085+K14085+K14085	https:\\www.genome.jp\dbget-bin\www_bget?map00280
Diterpenoid biosynthesis	ko00904	3 out of 578 0.519031141868512%	128 out of 32833 0.389851673621052%	0.392272	1	BnaA01G0114200ZS;BnaA02G0244700ZS;BnaC02G0328200ZS	K04125+K05282+K05282	https:\\www.genome.jp\dbget-bin\www_bget?map00904
beta-Alanine metabolism	ko00410	6 out of 578 1.03806228373702%	311 out of 32833 0.94721773825115%	0.467878	1	BnaA02G0263300ZS;BnaA05G0351700ZS;BnaA09G0220100ZS;novel.6232;novel.8954;novel.868	K00276+K01578+K01580+K14085+K14085+K14085	https:\\www.genome.jp\dbget-bin\www_bget?map00410
Lysine biosynthesis	ko00300	2 out of 578 0.346020761245675%	92 out of 32833 0.280205890415131%	0.483412	1	BnaA09G0553300ZS;BnaC03G0484900ZS	K01714+K10206	https:\\www.genome.jp\dbget-bin\www_bget?map00300
Ascorbate and aldarate metabolism	ko00053	8 out of 578 1.3840830449827%	436 out of 32833 1.32793226327171%	0.502404	1	BnaA09G0645700ZS;novel.5166;BnaA03G0491300ZS;BnaA09G0123600ZS;BnaC07G0469700ZS;novel.6232;novel.8954;novel.868	K00423+K00423+K00469+K00469+K00469+K14085+K14085+K14085	https:\\www.genome.jp\dbget-bin\www_bget?map00053
Zeatin biosynthesis	ko00908	3 out of 578 0.519031141868512%	154 out of 32833 0.469040294825328%	0.511024	1	BnaC08G0332400ZS;BnaA09G0493600ZS;BnaA09G0493700ZS	K13496+K13496+K13496	https:\\www.genome.jp\dbget-bin\www_bget?map00908
Fructose and mannose metabolism	ko00051	7 out of 578 1.21107266435986%	387 out of 32833 1.17869216946365%	0.523876	1	BnaA06G0449300ZS;BnaA08G0198600ZS;novel.7276;BnaA04G0041000ZS;BnaC04G0315300ZS;BnaA02G0163300ZS;BnaC02G0209100ZS	K01623+K01623+K01623+K01803+K01803+K01809+K01809	https:\\www.genome.jp\dbget-bin\www_bget?map00051
Glyoxylate and dicarboxylate metabolism	ko00630	8 out of 578 1.3840830449827%	449 out of 32833 1.36752657387385%	0.535609	1	BnaC09G0104800ZS;BnaA09G0104000ZS;BnaC09G0498800ZS;BnaA07G0182800ZS;BnaA10G0200900ZS;BnaC02G0075000ZS;BnaC08G0260800ZS;BnaC06G0457600ZS	K00830+K00830+K01915+K01915+K01915+K01915+K03781+K15918	https:\\www.genome.jp\dbget-bin\www_bget?map00630
Fatty acid degradation	ko00071	5 out of 578 0.865051903114187%	277 out of 32833 0.843663387445558%	0.539612	1	BnaA03G0376800ZS;BnaC03G0461600ZS;novel.6232;novel.8954;novel.868	K01897+K01897+K14085+K14085+K14085	https:\\www.genome.jp\dbget-bin\www_bget?map00071
Pantothenate and CoA biosynthesis	ko00770	4 out of 578 0.692041522491349%	221 out of 32833 0.673103280236348%	0.547041	1	BnaA02G0158700ZS;BnaC03G0780900ZS;novel.7232;novel.7233	K00826+K00826+K01653+K01653	https:\\www.genome.jp\dbget-bin\www_bget?map00770
Betalain biosynthesis	ko00965	2 out of 578 0.346020761245675%	104 out of 32833 0.316754484817105%	0.548824	1	BnaA07G0250600ZS;BnaC06G0276500ZS	K15777+K15777	https:\\www.genome.jp\dbget-bin\www_bget?map00965
Cutin, suberine and wax biosynthesis	ko00073	5 out of 578 0.865051903114187%	288 out of 32833 0.877166265647367%	0.57416	1	BnaA08G0218900ZS;BnaC03G0645200ZS;BnaC03G0565200ZS;BnaA06G0441300ZS;novel.1837	K15400+K15400+K15406+K20769+K20769	https:\\www.genome.jp\dbget-bin\www_bget?map00073
Other glycan degradation	ko00511	5 out of 578 0.865051903114187%	295 out of 32833 0.898486279048518%	0.595423	1	BnaC09G0444300ZS;BnaA09G0434700ZS;BnaA09G0708200ZS;BnaC03G0131700ZS;BnaC03G0632800ZS	K12309+K12309+K12309+K12309+K12309	https:\\www.genome.jp\dbget-bin\www_bget?map00511
Monobactam biosynthesis	ko00261	1 out of 578 0.173010380622837%	56 out of 32833 0.17056010720921%	0.630446	1	BnaA09G0553300ZS	K01714	https:\\www.genome.jp\dbget-bin\www_bget?map00261
Sphingolipid metabolism	ko00600	5 out of 578 0.865051903114187%	311 out of 32833 0.94721773825115%	0.641714	1	BnaC09G0444300ZS;BnaA09G0434700ZS;BnaA09G0708200ZS;BnaC03G0131700ZS;BnaC03G0632800ZS	K12309+K12309+K12309+K12309+K12309	https:\\www.genome.jp\dbget-bin\www_bget?map00600
Phenylalanine, tyrosine and tryptophan biosynthesis	ko00400	4 out of 578 0.692041522491349%	250 out of 32833 0.761429050041117%	0.643835	1	BnaA03G0473600ZS;BnaA09G0578100ZS;BnaC06G0001700ZS;BnaC07G0451900ZS	K00815+K00815+K00815+K00815	https:\\www.genome.jp\dbget-bin\www_bget?map00400
Peroxisome	ko04146	7 out of 578 1.21107266435986%	435 out of 32833 1.32488654707154%	0.646489	1	BnaC09G0104800ZS;BnaA09G0104000ZS;BnaA05G0351700ZS;BnaA03G0376800ZS;BnaC03G0461600ZS;BnaC08G0260800ZS;BnaC07G0462000ZS	K00830+K00830+K01578+K01897+K01897+K03781+K04564	https:\\www.genome.jp\dbget-bin\www_bget?map04146
Carbon fixation in photosynthetic organisms	ko00710	6 out of 578 1.03806228373702%	380 out of 32833 1.1573721560625%	0.661357	1	BnaA01G0195500ZS;BnaA06G0449300ZS;BnaA08G0198600ZS;novel.7276;BnaA04G0041000ZS;BnaC04G0315300ZS	K01006+K01623+K01623+K01623+K01803+K01803	https:\\www.genome.jp\dbget-bin\www_bget?map00710
Vitamin B6 metabolism	ko00750	1 out of 578 0.173010380622837%	61 out of 32833 0.185788688210033%	0.661903	1	BnaA08G0260500ZS	K13248	https:\\www.genome.jp\dbget-bin\www_bget?map00750
Isoflavonoid biosynthesis	ko00943	1 out of 578 0.173010380622837%	63 out of 32833 0.191880120610362%	0.673724	1	BnaC01G0018200ZS	K13260	https:\\www.genome.jp\dbget-bin\www_bget?map00943
Protein export	ko03060	5 out of 578 0.865051903114187%	323 out of 32833 0.983766332653123%	0.674187	1	BnaC08G0401400ZS;BnaA03G0222100ZS;BnaA09G0554600ZS;BnaC03G0261200ZS;BnaC04G0061400ZS	K03110+K03110+K03110+K03110+K03110	https:\\www.genome.jp\dbget-bin\www_bget?map03060
Endocytosis	ko04144	16 out of 578 2.7681660899654%	1012 out of 32833 3.08226479456644%	0.704232	1	BnaC08G0201200ZS;BnaC08G0201500ZS;BnaA03G0124300ZS;BnaA09G0033300ZS;BnaA01G0396500ZS;BnaC03G0307200ZS;BnaC03G0307300ZS;novel.1098;BnaC08G0448800ZS;BnaC03G0703700ZS;BnaC04G0564000ZS;novel.1446;BnaC02G0455300ZS;BnaC08G0039700ZS;BnaC09G0253700ZS;BnaA08G0275300ZS	K00889+K00889+K00889+K00889+K01115+K01115+K01115+K03283+K07897+K07904+K12183+K12193+K12198+K12472+K12486+K19476	https:\\www.genome.jp\dbget-bin\www_bget?map04144
Lysine degradation	ko00310	4 out of 578 0.692041522491349%	272 out of 32833 0.828434806444735%	0.707548	1	novel.6232;novel.8954;novel.868;BnaA03G0535700ZS	K14085+K14085+K14085+K14157	https:\\www.genome.jp\dbget-bin\www_bget?map00310
Linoleic acid metabolism	ko00591	1 out of 578 0.173010380622837%	70 out of 32833 0.213200134011513%	0.711942	1	BnaA01G0301300ZS	K15718	https:\\www.genome.jp\dbget-bin\www_bget?map00591
Homologous recombination	ko03440	11 out of 578 1.90311418685121%	723 out of 32833 2.20205281271891%	0.729201	1	BnaA04G0159500ZS;BnaA09G0404900ZS;BnaA09G0568700ZS;novel.4434;BnaC09G0460900ZS;BnaC08G0252500ZS;BnaC08G0252700ZS;BnaA06G0134600ZS;BnaC05G0162100ZS;novel.3099;novel.3477	K07466+K07466+K07466+K07466+K10875+K12173+K12173+K12173+K12173+K12173+K12173	https:\\www.genome.jp\dbget-bin\www_bget?map03440
Amino sugar and nucleotide sugar metabolism	ko00520	15 out of 578 2.59515570934256%	970 out of 32833 2.95434471415953%	0.731012	1	Bnascaffold0511G0000100ZS;BnaC03G0031000ZS;BnaC04G0572700ZS;BnaA03G0211900ZS;BnaA03G0212300ZS;BnaA04G0277400ZS;BnaA05G0039200ZS;BnaC01G0129000ZS;BnaC04G0595200ZS;novel.4662;novel.1185;BnaA02G0163300ZS;BnaC02G0209100ZS;BnaA06G0357200ZS;BnaC07G0335700ZS	K00963+K00975+K00975+K01183+K01183+K01183+K01183+K01183+K01183+K01183+K01183+K01809+K01809+K15920+K15920	https:\\www.genome.jp\dbget-bin\www_bget?map00520
Porphyrin and chlorophyll metabolism	ko00860	3 out of 578 0.519031141868512%	217 out of 32833 0.66092041543569%	0.737882	1	BnaA07G0314700ZS;BnaA01G0146000ZS;BnaC01G0020300ZS	K01698+K03428+K13545	https:\\www.genome.jp\dbget-bin\www_bget?map00860
Photosynthesis - antenna proteins	ko00196	1 out of 578 0.173010380622837%	81 out of 32833 0.246703012213322%	0.763171	1	BnaA03G0206900ZS	K08917	https:\\www.genome.jp\dbget-bin\www_bget?map00196
Pyrimidine metabolism	ko00240	5 out of 578 0.865051903114187%	361 out of 32833 1.09950354825937%	0.763675	1	BnaA10G0184800ZS;BnaA01G0306500ZS;BnaC01G0378900ZS;BnaA01G0200600ZS;BnaA03G0241400ZS	K01240+K01510+K01510+K03787+K13998	https:\\www.genome.jp\dbget-bin\www_bget?map00240
Biosynthesis of unsaturated fatty acids	ko01040	1 out of 578 0.173010380622837%	84 out of 32833 0.255840160813815%	0.77549	1	novel.3403	K10251	https:\\www.genome.jp\dbget-bin\www_bget?map01040
Indole alkaloid biosynthesis	ko00901	1 out of 578 0.173010380622837%	88 out of 32833 0.268023025614473%	0.790925	1	BnaC02G0279900ZS	K01757	https:\\www.genome.jp\dbget-bin\www_bget?map00901
Various types of N-glycan biosynthesis	ko00513	2 out of 578 0.346020761245675%	167 out of 32833 0.508634605427466%	0.795129	1	BnaC04G0601200ZS;novel.1080	K03847+K03847	https:\\www.genome.jp\dbget-bin\www_bget?map00513
One carbon pool by folate	ko00670	1 out of 578 0.173010380622837%	111 out of 32833 0.338074498218256%	0.861213	1	BnaA03G0241400ZS	K13998	https:\\www.genome.jp\dbget-bin\www_bget?map00670
Fatty acid biosynthesis	ko00061	2 out of 578 0.346020761245675%	213 out of 32833 0.648737550635032%	0.891186	1	BnaA03G0376800ZS;BnaC03G0461600ZS	K01897+K01897	https:\\www.genome.jp\dbget-bin\www_bget?map00061
Glycolysis / Gluconeogenesis	ko00010	9 out of 578 1.55709342560554%	732 out of 32833 2.22946425852039%	0.899585	1	BnaA01G0195500ZS;BnaA06G0449300ZS;BnaA08G0198600ZS;novel.7276;BnaA04G0041000ZS;BnaC04G0315300ZS;novel.6232;novel.8954;novel.868	K01006+K01623+K01623+K01623+K01803+K01803+K14085+K14085+K14085	https:\\www.genome.jp\dbget-bin\www_bget?map00010
Fatty acid metabolism	ko01212	3 out of 578 0.519031141868512%	312 out of 32833 0.950263454451314%	0.914095	1	BnaA03G0376800ZS;BnaC03G0461600ZS;novel.3403	K01897+K01897+K10251	https:\\www.genome.jp\dbget-bin\www_bget?map01212
Terpenoid backbone biosynthesis	ko00900	2 out of 578 0.346020761245675%	236 out of 32833 0.718789023238815%	0.921658	1	BnaC06G0452000ZS;BnaC02G0132700ZS	K01823+K11778	https:\\www.genome.jp\dbget-bin\www_bget?map00900
Arachidonic acid metabolism	ko00590	1 out of 578 0.173010380622837%	145 out of 32833 0.441628849023848%	0.924307	1	BnaC07G0488400ZS	K18592	https:\\www.genome.jp\dbget-bin\www_bget?map00590
Glycosylphosphatidylinositol (GPI)-anchor biosynthesis	ko00563	1 out of 578 0.173010380622837%	146 out of 32833 0.444674565224012%	0.925645	1	BnaA07G0245600ZS	K03860	https:\\www.genome.jp\dbget-bin\www_bget?map00563
Pentose phosphate pathway	ko00030	3 out of 578 0.519031141868512%	326 out of 32833 0.992903481253617%	0.928038	1	BnaA06G0449300ZS;BnaA08G0198600ZS;novel.7276	K01623+K01623+K01623	https:\\www.genome.jp\dbget-bin\www_bget?map00030
Fatty acid elongation	ko00062	1 out of 578 0.173010380622837%	152 out of 32833 0.462948862424999%	0.933194	1	novel.3403	K10251	https:\\www.genome.jp\dbget-bin\www_bget?map00062
N-Glycan biosynthesis	ko00510	2 out of 578 0.346020761245675%	250 out of 32833 0.761429050041117%	0.936066	1	BnaC04G0601200ZS;novel.1080	K03847+K03847	https:\\www.genome.jp\dbget-bin\www_bget?map00510
Propanoate metabolism	ko00640	1 out of 578 0.173010380622837%	172 out of 32833 0.523863186428289%	0.953251	1	BnaA05G0351700ZS	K01578	https:\\www.genome.jp\dbget-bin\www_bget?map00640
Pentose and glucuronate interconversions	ko00040	11 out of 578 1.90311418685121%	979 out of 32833 2.98175615996101%	0.959551	1	Bnascaffold0511G0000100ZS;BnaC09G0285100ZS;BnaA01G0354100ZS;BnaA01G0377400ZS;BnaA03G0219900ZS;BnaA09G0243200ZS;BnaC03G0258900ZS;BnaC03G0383700ZS;BnaA04G0279400ZS;BnaC04G0597500ZS;BnaA10G0012000ZS	K00963+K01051+K01051+K01051+K01051+K01051+K01051+K01051+K01184+K01184+K01213	https:\\www.genome.jp\dbget-bin\www_bget?map00040
Biosynthesis of cofactors	ko01240	15 out of 578 2.59515570934256%	1308 out of 32833 3.98379678981513%	0.972711	1	BnaA02G0158700ZS;BnaC03G0780900ZS;Bnascaffold0511G0000100ZS;BnaA07G0314700ZS;BnaA02G0163300ZS;BnaC02G0209100ZS;BnaC02G0022200ZS;BnaC08G0249400ZS;BnaA02G0212800ZS;BnaA07G0296500ZS;BnaC09G0150100ZS;BnaA09G0140500ZS;BnaA09G0141900ZS;BnaA08G0260500ZS;BnaA03G0241400ZS	K00826+K00826+K00963+K01698+K01809+K01809+K01930+K02552+K02552+K03517+K11153+K11153+K11153+K13248+K13998	https:\\www.genome.jp\dbget-bin\www_bget?map01240
Photosynthesis	ko00195	2 out of 578 0.346020761245675%	312 out of 32833 0.950263454451314%	0.97463	1	BnaA01G0343400ZS;BnaC08G0493500ZS	K02695+K08901	https:\\www.genome.jp\dbget-bin\www_bget?map00195
Base excision repair	ko03410	1 out of 578 0.173010380622837%	207 out of 32833 0.630463253434045%	0.974984	1	novel.7666	K03575	https:\\www.genome.jp\dbget-bin\www_bget?map03410
Carbon metabolism	ko01200	15 out of 578 2.59515570934256%	1326 out of 32833 4.03861968141809%	0.976456	1	BnaA01G0405900ZS;BnaC01G0508900ZS;BnaC06G0142700ZS;BnaC09G0104800ZS;BnaA09G0104000ZS;BnaA01G0195500ZS;BnaA06G0449300ZS;BnaA08G0198600ZS;novel.7276;BnaA02G0370200ZS;BnaC02G0496100ZS;BnaA04G0041000ZS;BnaC04G0315300ZS;BnaC08G0260800ZS;BnaC06G0457600ZS	K00261+K00261+K00640+K00830+K00830+K01006+K01623+K01623+K01623+K01738+K01738+K01803+K01803+K03781+K15918	https:\\www.genome.jp\dbget-bin\www_bget?map01200
Autophagy - other	ko04136	1 out of 578 0.173010380622837%	212 out of 32833 0.645691834434867%	0.977122	1	BnaC04G0603300ZS	K08341	https:\\www.genome.jp\dbget-bin\www_bget?map04136
SNARE interactions in vesicular transport	ko04130	1 out of 578 0.173010380622837%	217 out of 32833 0.66092041543569%	0.979079	1	novel.5282	K08486	https:\\www.genome.jp\dbget-bin\www_bget?map04130
DNA replication	ko03030	5 out of 578 0.865051903114187%	627 out of 32833 1.90966405750312%	0.986532	1	novel.318;BnaA04G0159500ZS;BnaA09G0404900ZS;BnaA09G0568700ZS;novel.4434	K02209+K07466+K07466+K07466+K07466	https:\\www.genome.jp\dbget-bin\www_bget?map03030
Ubiquitin mediated proteolysis	ko04120	8 out of 578 1.3840830449827%	883 out of 32833 2.68936740474523%	0.988317	1	BnaC02G0529800ZS;BnaC03G0183600ZS;BnaA05G0089300ZS;BnaC04G0105400ZS;BnaA07G0372100ZS;BnaA07G0234000ZS;BnaA02G0009500ZS;BnaA09G0229500ZS	K03363+K06689+K10260+K10260+K10570+K10580+K10590+K10615	https:\\www.genome.jp\dbget-bin\www_bget?map04120
alpha-Linolenic acid metabolism	ko00592	1 out of 578 0.173010380622837%	250 out of 32833 0.761429050041117%	0.988407	1	BnaC05G0560400ZS	K10529	https:\\www.genome.jp\dbget-bin\www_bget?map00592
Mismatch repair	ko03430	4 out of 578 0.692041522491349%	562 out of 32833 1.71169250449243%	0.98978	1	BnaA04G0159500ZS;BnaA09G0404900ZS;BnaA09G0568700ZS;novel.4434	K07466+K07466+K07466+K07466	https:\\www.genome.jp\dbget-bin\www_bget?map03430
Nucleotide excision repair	ko03420	5 out of 578 0.865051903114187%	657 out of 32833 2.00103554350806%	0.990709	1	BnaA04G0159500ZS;BnaA09G0404900ZS;BnaA09G0568700ZS;novel.4434;BnaA07G0372100ZS	K07466+K07466+K07466+K07466+K10570	https:\\www.genome.jp\dbget-bin\www_bget?map03420
Pyruvate metabolism	ko00620	4 out of 578 0.692041522491349%	574 out of 32833 1.74824109889441%	0.991283	1	BnaA01G0195500ZS;novel.6232;novel.8954;novel.868	K01006+K14085+K14085+K14085	https:\\www.genome.jp\dbget-bin\www_bget?map00620
RNA polymerase	ko03020	1 out of 578 0.173010380622837%	306 out of 32833 0.931989157250327%	0.995749	1	novel.7953	K03006	https:\\www.genome.jp\dbget-bin\www_bget?map03020
Spliceosome	ko03040	11 out of 578 1.90311418685121%	1228 out of 32833 3.74013949380197%	0.996344	1	novel.1098;novel.9850;BnaA03G0054800ZS;BnaC03G0063000ZS;BnaC03G0063100ZS;BnaC07G0412600ZS;BnaA03G0445900ZS;BnaA04G0141800ZS;BnaC03G0059500ZS;BnaC09G0527300ZS;BnaC03G0061100ZS	K03283+K11094+K12818+K12818+K12818+K12825+K12835+K12835+K12835+K12900+K12900	https:\\www.genome.jp\dbget-bin\www_bget?map03040
Purine metabolism	ko00230	3 out of 578 0.519031141868512%	557 out of 32833 1.69646392349161%	0.997098	1	BnaA01G0306500ZS;BnaC01G0378900ZS;BnaA01G0200600ZS	K01510+K01510+K03787	https:\\www.genome.jp\dbget-bin\www_bget?map00230
Ribosome biogenesis in eukaryotes	ko03008	3 out of 578 0.519031141868512%	654 out of 32833 1.99189839490756%	0.999324	1	novel.10083;novel.10084;BnaA09G0379400ZS	K06943+K06943+K14548	https:\\www.genome.jp\dbget-bin\www_bget?map03008
Circadian rhythm - plant	ko04712	1 out of 578 0.173010380622837%	414 out of 32833 1.26092650686809%	0.999389	1	BnaC04G0455600ZS	K12126	https:\\www.genome.jp\dbget-bin\www_bget?map04712
RNA transport	ko03013	7 out of 578 1.21107266435986%	1113 out of 32833 3.38988213078305%	0.999736	1	BnaC01G0211600ZS;BnaC03G0726900ZS;BnaA10G0170600ZS;BnaA03G0186300ZS;BnaA03G0186400ZS;BnaC03G0218800ZS;BnaA08G0244100ZS	K03113+K03231+K03238+K03239+K03239+K03239+K03243	https:\\www.genome.jp\dbget-bin\www_bget?map03013
Oxidative phosphorylation	ko00190	4 out of 578 0.692041522491349%	844 out of 32833 2.57058447293881%	0.999808	1	BnaA06G0406600ZS;novel.4755;BnaA07G0244300ZS;BnaC05G0548600ZS	K01535+K01535+K03958+K11352	https:\\www.genome.jp\dbget-bin\www_bget?map00190
Aminoacyl-tRNA biosynthesis	ko00970	1 out of 578 0.173010380622837%	489 out of 32833 1.48935522188043%	0.999842	1	BnaA02G0408700ZS	K02433	https:\\www.genome.jp\dbget-bin\www_bget?map00970
Phagosome	ko04145	1 out of 578 0.173010380622837%	490 out of 32833 1.49240093808059%	0.999845	1	BnaC08G0448800ZS	K07897	https:\\www.genome.jp\dbget-bin\www_bget?map04145
RNA degradation	ko03018	3 out of 578 0.519031141868512%	762 out of 32833 2.32083574452533%	0.999873	1	BnaC05G0552200ZS;BnaA04G0093800ZS;novel.6403	K00962+K04077+K12617	https:\\www.genome.jp\dbget-bin\www_bget?map03018
Protein processing in endoplasmic reticulum	ko04141	6 out of 578 1.03806228373702%	1211 out of 32833 3.68836231839917%	0.999982	1	novel.1098;BnaC03G0183600ZS;BnaA01G0031500ZS;BnaA06G0092300ZS;BnaC05G0014700ZS;BnaA09G0568200ZS	K03283+K06689+K10661+K10661+K10661+K14015	https:\\www.genome.jp\dbget-bin\www_bget?map04141
mRNA surveillance pathway	ko03015	1 out of 578 0.173010380622837%	678 out of 32833 2.06499558371151%	0.999995	1	BnaA03G0556300ZS	K14399	https:\\www.genome.jp\dbget-bin\www_bget?map03015
Ribosome	ko03010	3 out of 578 0.519031141868512%	1620 out of 32833 4.93406024426644%	1	1	novel.8761;BnaC09G0346400ZS;novel.5724	K02891+K02947+K02973	https:\\www.genome.jp\dbget-bin\www_bget?map03010

## Sheet: Sheet5
#KEGG_pathway	ko_id	Cluster_frequency	Genome_frequency	P-value	Corrected_P-value	GeneID	KEGG Orthology	hyperlink
Cyanoamino acid metabolism	ko00460	20 out of 552 3.6231884057971%	331 out of 32833 1.00813206225444%	1.05254e-06	0.000125252	BnaC08G0393500ZS;BnaC08G0393700ZS;BnaC09G0579300ZS;BnaA04G0017900ZS;BnaA05G0045000ZS;BnaA07G0063200ZS;BnaA09G0547400ZS;BnaC04G0049800ZS;BnaC04G0050200ZS;BnaC04G0050600ZS;BnaC04G0279200ZS;BnaC04G0279600ZS;BnaC05G0016100ZS;BnaC01G0424200ZS;BnaC08G0437400ZS;BnaA03G0415700ZS;BnaA03G0559800ZS;BnaC04G0448000ZS;novel.7145;novel.1753	K01188+K01188+K01188+K01188+K01188+K01188+K01188+K01188+K01188+K01188+K01188+K01188+K01188+K13051+K20802+K20802+K20802+K20802+K20802+K20802	https:\\www.genome.jp\dbget-bin\www_bget?map00460
Phenylpropanoid biosynthesis	ko00940	36 out of 552 6.52173913043478%	1067 out of 32833 3.24977918557549%	7.11995e-05	0.00847274	BnaA08G0190200ZS;BnaC03G0683500ZS;BnaC08G0294600ZS;BnaA01G0376700ZS;BnaA03G0523200ZS;BnaC02G0098000ZS;BnaC04G0562000ZS;novel.9468;BnaC08G0393500ZS;BnaC08G0393700ZS;BnaC09G0579300ZS;BnaA04G0017900ZS;BnaA05G0045000ZS;BnaA07G0063200ZS;BnaA09G0547400ZS;BnaC04G0049800ZS;BnaC04G0050200ZS;BnaC04G0050600ZS;BnaC04G0279200ZS;BnaC04G0279600ZS;BnaC05G0016100ZS;BnaA06G0258400ZS;novel.4257;novel.8218;BnaA06G04…	K00083+K00083+K00430+K00430+K00430+K00430+K00430+K00430+K01188+K01188+K01188+K01188+K01188+K01188+K01188+K01188+K01188+K01188+K01188+K01188+K01188+K06892+K09753+K09754+K09755+K13068+K13068+K13068+K18368+K22395+K22395+K22395+K22395+K23260+K23260+K23260	https:\\www.genome.jp\dbget-bin\www_bget?map00940
Anthocyanin biosynthesis	ko00942	5 out of 552 0.905797101449275%	28 out of 32833 0.0852800536046051%	9.41401e-05	0.0112027	BnaA08G0082300ZS;BnaC08G0116200ZS;BnaC09G0362400ZS;BnaA06G0190700ZS;BnaA10G0103400ZS	K12338+K12338+K17193+K17193+K17193	https:\\www.genome.jp\dbget-bin\www_bget?map00942
Biosynthesis of secondary metabolites	ko01110	157 out of 552 28.4420289855072%	7179 out of 32833 21.8651966009807%	0.000151118	0.0179831	BnaA08G0190200ZS;BnaC03G0683500ZS;BnaA03G0540000ZS;BnaA03G0553300ZS;BnaC02G0357300ZS;BnaC07G0529600ZS;BnaC08G0294600ZS;BnaA01G0376700ZS;BnaA03G0523200ZS;BnaC02G0098000ZS;BnaC04G0562000ZS;novel.9468;BnaC08G0240500ZS;BnaA09G0068700ZS;BnaC04G0353700ZS;BnaC07G0367400ZS;BnaA03G0054700ZS;BnaA03G0053300ZS;BnaC03G0061300ZS;novel.585;BnaC09G0008900ZS;BnaA09G0024200ZS;BnaC03G0689600ZS;BnaC04G0332800ZS;BnaC…	K00083+K00083+K00128+K00276+K00276+K00276+K00430+K00430+K00430+K00430+K00430+K00430+K00454+K00511+K00511+K00511+K00559+K00616+K00616+K00655+K00695+K00695+K00695+K00695+K00696+K00827+K00850+K00873+K00901+K00928+K00963+K00975+K00981+K00993+K00993+K01081+K01114+K01176+K01176+K01176+K01177+K01177+K01177+K01188+K01188+K01188+K01188+K01188+K01188+K01188+K01188+K01188+K01188+K01188+K01188+K01188+K01193+…	https:\\www.genome.jp\dbget-bin\www_bget?map01110
Flavone and flavonol biosynthesis	ko00944	3 out of 552 0.543478260869565%	11 out of 32833 0.0335028782018092%	0.000705217	0.0839208	BnaC09G0570900ZS;BnaA08G0317300ZS;BnaC08G0007500ZS	K05280+K13264+K13264	https:\\www.genome.jp\dbget-bin\www_bget?map00944
Plant-pathogen interaction	ko04626	68 out of 552 12.3188405797101%	2759 out of 32833 8.40313099625377%	0.000968953	0.115305	BnaA02G0351200ZS;BnaA04G0109300ZS;BnaC04G0392100ZS;BnaC08G0479500ZS;BnaA10G0096600ZS;BnaC01G0411100ZS;novel.558;BnaC08G0374600ZS;BnaA07G0150600ZS;BnaC03G0502900ZS;BnaC07G0216700ZS;BnaC04G0266900ZS;BnaA03G0536900ZS;BnaC04G0187800ZS;BnaA07G0234200ZS;BnaA02G0239700ZS;BnaA03G0185200ZS;BnaA04G0247200ZS;BnaA05G0071200ZS;BnaC02G0323100ZS;BnaC03G0217300ZS;BnaC09G0446700ZS;BnaC09G0032300ZS;BnaA06G0145100Z…	K02183+K02183+K02183+K05391+K05391+K05391+K05391+K13412+K13412+K13412+K13412+K13414+K13416+K13416+K13420+K13424+K13424+K13424+K13424+K13424+K13424+K13426+K13430+K13430+K13430+K13434+K13435+K13435+K13436+K13436+K13436+K13447+K13448+K13448+K13448+K13448+K13448+K13448+K13448+K13448+K13448+K13456+K13456+K13458+K13459+K13460+K13466+K13466+K13466+K13466+K15397+K15397+K15397+K15397+K16224+K16224+K16225+…	https:\\www.genome.jp\dbget-bin\www_bget?map04626
Brassinosteroid biosynthesis	ko00905	5 out of 552 0.905797101449275%	46 out of 32833 0.140102945207566%	0.00102408	0.121865	BnaA09G0472400ZS;BnaA03G0555000ZS;BnaC07G0531500ZS;BnaA01G0357900ZS;BnaC01G0445000ZS	K09587+K12637+K12637+K12638+K12638	https:\\www.genome.jp\dbget-bin\www_bget?map00905
Nitrogen metabolism	ko00910	10 out of 552 1.81159420289855%	181 out of 32833 0.551274632229769%	0.00103841	0.123571	BnaC01G0508900ZS;BnaA07G0116200ZS;BnaC09G0498800ZS;BnaC08G0220400ZS;BnaA06G0047500ZS;BnaA08G0276500ZS;BnaA07G0237900ZS;BnaA07G0369900ZS;BnaC06G0258800ZS;BnaC06G0434700ZS	K00261+K01673+K01915+K02575+K02575+K02575+K10534+K10534+K10534+K10534	https:\\www.genome.jp\dbget-bin\www_bget?map00910
Circadian rhythm - plant	ko04712	16 out of 552 2.89855072463768%	414 out of 32833 1.26092650686809%	0.00192422	0.228982	BnaA09G0071100ZS;BnaC01G0381100ZS;BnaA07G0218800ZS;BnaA10G0010700ZS;BnaC04G0010300ZS;BnaA04G0295200ZS;BnaA05G0011400ZS;BnaA06G0329000ZS;BnaA09G0067500ZS;BnaC07G0364800ZS;BnaA05G0011000ZS;BnaC04G0011300ZS;BnaA10G0206100ZS;BnaA03G0221500ZS;BnaA06G0175400ZS;BnaC03G0619100ZS	K10143+K12125+K12126+K12126+K12126+K12128+K12128+K12130+K12130+K12130+K12134+K12134+K12135+K16221+K16222+K16222	https:\\www.genome.jp\dbget-bin\www_bget?map04712
Riboflavin metabolism	ko00740	7 out of 552 1.26811594202899%	120 out of 32833 0.365485944019736%	0.00425348	0.506164	BnaC08G0352200ZS;BnaA08G0158400ZS;BnaA09G0510700ZS;BnaC03G0778100ZS;BnaA05G0381600ZS;BnaC05G0425800ZS;BnaC07G0274000ZS	K01513+K01513+K01513+K01513+K14379+K14379+K14379	https:\\www.genome.jp\dbget-bin\www_bget?map00740
Starch and sucrose metabolism	ko00500	35 out of 552 6.34057971014493%	1342 out of 32833 4.08735114062072%	0.0073376	0.873175	BnaC09G0008900ZS;BnaA09G0024200ZS;BnaC03G0689600ZS;BnaC04G0332800ZS;BnaC03G0050300ZS;BnaC01G0505700ZS;BnaC05G0118100ZS;BnaC09G0004000ZS;BnaC09G0010200ZS;BnaC09G0010300ZS;BnaC09G0477500ZS;BnaA10G0186000ZS;novel.279;BnaC01G0177500ZS;BnaC01G0204600ZS;BnaC08G0393500ZS;BnaC08G0393700ZS;BnaC09G0579300ZS;BnaA04G0017900ZS;BnaA05G0045000ZS;BnaA07G0063200ZS;BnaA09G0547400ZS;BnaC04G0049800ZS;BnaC04G0050200Z…	K00695+K00695+K00695+K00695+K00696+K00963+K00975+K01176+K01176+K01176+K01177+K01177+K01177+K01179+K01179+K01188+K01188+K01188+K01188+K01188+K01188+K01188+K01188+K01188+K01188+K01188+K01188+K01188+K01193+K01194+K01513+K01513+K01513+K01513+K01835	https:\\www.genome.jp\dbget-bin\www_bget?map00500
Carotenoid biosynthesis	ko00906	8 out of 552 1.44927536231884%	170 out of 32833 0.51777175402796%	0.00832666	0.990872	BnaC09G0232800ZS;BnaA02G0292900ZS;BnaA04G0188100ZS;BnaA06G0430700ZS;BnaA09G0201200ZS;BnaC01G0124100ZS;BnaC02G0400200ZS;BnaC06G0067000ZS	K09843+K09843+K09843+K09843+K09843+K09843+K09843+K15748	https:\\www.genome.jp\dbget-bin\www_bget?map00906
Glycine, serine and threonine metabolism	ko00260	15 out of 552 2.71739130434783%	450 out of 32833 1.37057229007401%	0.00988033	1	BnaA09G0516900ZS;BnaC03G0573400ZS;BnaA03G0553300ZS;BnaC02G0357300ZS;BnaC07G0529600ZS;BnaC04G0458700ZS;novel.1320;BnaC02G0163200ZS;BnaC05G0064400ZS;novel.2431;BnaC04G0420900ZS;novel.417;novel.533;novel.640;BnaA06G0081800ZS	K00108+K00130+K00276+K00276+K00276+K00306+K00827+K00928+K01620+K01620+K06001+K14085+K14085+K14085+K15919	https:\\www.genome.jp\dbget-bin\www_bget?map00260
Plant hormone signal transduction	ko04075	52 out of 552 9.42028985507246%	2271 out of 32833 6.91682149057351%	0.0149637	1	BnaA07G0218800ZS;BnaA10G0010700ZS;BnaC04G0010300ZS;BnaC03G0189300ZS;BnaA03G0536900ZS;BnaC04G0187800ZS;BnaC09G0307800ZS;BnaA09G0209900ZS;BnaC03G0274900ZS;BnaA07G0191600ZS;BnaC06G0391300ZS;BnaA01G0055600ZS;BnaA01G0401300ZS;BnaA03G0375000ZS;BnaA03G0506400ZS;BnaC03G0412800ZS;novel.1364;BnaC02G0166500ZS;BnaC08G0409000ZS;BnaA01G0035100ZS;BnaA03G0467200ZS;BnaA03G0546800ZS;BnaA07G0133200ZS;BnaC01G0155600…	K12126+K12126+K12126+K13415+K13416+K13416+K13422+K13422+K13422+K13464+K13464+K14484+K14484+K14484+K14484+K14484+K14484+K14487+K14488+K14488+K14488+K14488+K14488+K14488+K14488+K14488+K14491+K14491+K14492+K14493+K14493+K14493+K14493+K14493+K14494+K14494+K14494+K14494+K14494+K14496+K14496+K14497+K14504+K14504+K14504+K14504+K14504+K14504+K14504+K14509+K14509+K14517	https:\\www.genome.jp\dbget-bin\www_bget?map04075
Flavonoid biosynthesis	ko00941	9 out of 552 1.6304347826087%	233 out of 32833 0.709651874638321%	0.0176817	1	BnaA01G0127300ZS;BnaA03G0469300ZS;BnaC01G0158400ZS;BnaC07G0445600ZS;BnaC09G0570900ZS;novel.8218;BnaC09G0215200ZS;BnaA09G0187400ZS;BnaC02G0378400ZS	K05277+K05277+K05277+K05277+K05280+K09754+K13082+K13082+K13082	https:\\www.genome.jp\dbget-bin\www_bget?map00941
Valine, leucine and isoleucine degradation	ko00280	11 out of 552 1.99275362318841%	340 out of 32833 1.03554350805592%	0.0300279	1	BnaA02G0407800ZS;BnaC02G0541900ZS;BnaA03G0540000ZS;novel.1320;BnaA05G0147600ZS;BnaA06G0179400ZS;BnaC06G0147700ZS;BnaA03G0541400ZS;novel.417;novel.533;novel.640	K00020+K00020+K00128+K00827+K01968+K01968+K01968+K01969+K14085+K14085+K14085	https:\\www.genome.jp\dbget-bin\www_bget?map00280
Glycerophospholipid metabolism	ko00564	17 out of 552 3.07971014492754%	622 out of 32833 1.8944354765023%	0.0356314	1	novel.585;BnaA01G0044000ZS;BnaA03G0590300ZS;BnaC08G0224100ZS;BnaA09G0640200ZS;BnaC01G0506700ZS;BnaA07G0327000ZS;BnaC02G0014700ZS;BnaA07G0085000ZS;BnaC09G0251100ZS;BnaA09G0216300ZS;BnaA09G0216400ZS;BnaC07G0265000ZS;BnaC07G0271300ZS;BnaA04G0285100ZS;BnaA07G0176300ZS;BnaC04G0603100ZS	K00655+K00901+K00981+K00993+K00993+K01114+K14156+K14674+K16818+K18693+K18693+K18693+K18693+K18693+K18696+K18696+K18696	https:\\www.genome.jp\dbget-bin\www_bget?map00564
Sesquiterpenoid and triterpenoid biosynthesis	ko00909	5 out of 552 0.905797101449275%	125 out of 32833 0.380714525020559%	0.0603206	1	BnaA09G0068700ZS;BnaC04G0353700ZS;BnaC07G0367400ZS;BnaC07G0369300ZS;BnaC06G0253500ZS	K00511+K00511+K00511+K14184+K15815	https:\\www.genome.jp\dbget-bin\www_bget?map00909
MAPK signaling pathway - plant	ko04016	40 out of 552 7.2463768115942%	1847 out of 32833 5.62543782170377%	0.0617929	1	BnaA02G0351200ZS;BnaA04G0109300ZS;BnaC04G0392100ZS;BnaC04G0266900ZS;BnaA03G0536900ZS;BnaC04G0187800ZS;BnaA07G0234200ZS;BnaC09G0307800ZS;BnaA09G0209900ZS;BnaC03G0274900ZS;BnaA02G0239700ZS;BnaA03G0185200ZS;BnaA04G0247200ZS;BnaA05G0071200ZS;BnaC02G0323100ZS;BnaC03G0217300ZS;BnaC09G0446700ZS;BnaA03G0483900ZS;BnaA05G0058400ZS;BnaC04G0064600ZS;BnaA10G0053600ZS;BnaA01G0294600ZS;BnaC01G0363300ZS;BnaA08G0…	K02183+K02183+K02183+K13414+K13416+K13416+K13420+K13422+K13422+K13422+K13424+K13424+K13424+K13424+K13424+K13424+K13426+K13447+K14496+K14496+K14497+K14509+K14509+K16224+K16224+K20547+K20558+K20558+K20559+K20600+K20606+K20606+K20716+K20718+K20718+K20727+K20728+K20728+K20772+K20772	https:\\www.genome.jp\dbget-bin\www_bget?map04016
Diterpenoid biosynthesis	ko00904	5 out of 552 0.905797101449275%	128 out of 32833 0.389851673621052%	0.0654016	1	BnaA02G0232000ZS;BnaA10G0011600ZS;BnaC02G0312300ZS;BnaC05G0013500ZS;BnaA03G0384500ZS	K04125+K04125+K04125+K04125+K17961	https:\\www.genome.jp\dbget-bin\www_bget?map00904
Nicotinate and nicotinamide metabolism	ko00760	5 out of 552 0.905797101449275%	130 out of 32833 0.395943106021381%	0.0689179	1	BnaA04G0157300ZS;BnaC08G0352200ZS;BnaA08G0158400ZS;BnaA09G0510700ZS;BnaC03G0778100ZS	K01081+K01513+K01513+K01513+K01513	https:\\www.genome.jp\dbget-bin\www_bget?map00760
Glycerolipid metabolism	ko00561	15 out of 552 2.71739130434783%	588 out of 32833 1.79088112569671%	0.0740752	1	BnaA03G0540000ZS;novel.585;BnaA06G0395600ZS;BnaA09G0203700ZS;BnaC03G0658600ZS;BnaA01G0044000ZS;novel.417;novel.533;novel.640;BnaC02G0014700ZS;BnaC09G0251100ZS;BnaA09G0216300ZS;BnaA09G0216400ZS;BnaC07G0265000ZS;BnaC07G0271300ZS	K00128+K00655+K00679+K00679+K00679+K00901+K14085+K14085+K14085+K14674+K18693+K18693+K18693+K18693+K18693	https:\\www.genome.jp\dbget-bin\www_bget?map00561
beta-Alanine metabolism	ko00410	9 out of 552 1.6304347826087%	311 out of 32833 0.94721773825115%	0.0813238	1	BnaA03G0540000ZS;BnaA03G0553300ZS;BnaC02G0357300ZS;BnaC07G0529600ZS;BnaA09G0220100ZS;BnaA03G0054600ZS;novel.417;novel.533;novel.640	K00128+K00276+K00276+K00276+K01580+K13366+K14085+K14085+K14085	https:\\www.genome.jp\dbget-bin\www_bget?map00410
Pyrimidine metabolism	ko00240	10 out of 552 1.81159420289855%	361 out of 32833 1.09950354825937%	0.0858527	1	BnaA04G0157300ZS;BnaC08G0352200ZS;BnaA08G0158400ZS;BnaA09G0510700ZS;BnaC03G0778100ZS;BnaA01G0365800ZS;BnaC07G0433200ZS;BnaA01G0148500ZS;BnaC01G0188400ZS;BnaA01G0404500ZS	K01081+K01513+K01513+K01513+K01513+K01937+K01937+K13800+K13800+K14641	https:\\www.genome.jp\dbget-bin\www_bget?map00240
Zeatin biosynthesis	ko00908	5 out of 552 0.905797101449275%	154 out of 32833 0.469040294825328%	0.118879	1	BnaA05G0434700ZS;BnaC05G0488900ZS;novel.5910;novel.1186;BnaA08G0239600ZS	K13493+K13493+K13496+K13496+K23452	https:\\www.genome.jp\dbget-bin\www_bget?map00908
RNA degradation	ko03018	17 out of 552 3.07971014492754%	762 out of 32833 2.32083574452533%	0.146767	1	BnaA08G0214700ZS;BnaA10G0214300ZS;BnaC05G0552200ZS;BnaA04G0175400ZS;BnaA08G0260800ZS;BnaC04G0473700ZS;BnaC09G0449600ZS;BnaA02G0090700ZS;BnaA06G0190900ZS;BnaA10G0165800ZS;BnaC02G0109300ZS;BnaC03G0600600ZS;novel.7212;BnaA04G0191400ZS;BnaA09G0486100ZS;BnaC04G0495500ZS;BnaA03G0538400ZS	K00850+K00962+K00962+K04077+K04077+K04077+K12581+K12581+K12581+K12581+K12581+K12581+K12617+K13126+K13126+K13126+K18681	https:\\www.genome.jp\dbget-bin\www_bget?map03018
Steroid biosynthesis	ko00100	5 out of 552 0.905797101449275%	166 out of 32833 0.505588889227302%	0.148819	1	BnaA09G0068700ZS;BnaC04G0353700ZS;BnaC07G0367400ZS;BnaA03G0054700ZS;BnaC02G0014700ZS	K00511+K00511+K00511+K00559+K14674	https:\\www.genome.jp\dbget-bin\www_bget?map00100
Glucosinolate biosynthesis	ko00966	4 out of 552 0.72463768115942%	123 out of 32833 0.37462309262023%	0.153519	1	BnaA08G0192100ZS;BnaA06G0110600ZS;BnaC05G0136700ZS;novel.8786	K11812+K12154+K12154+K15741	https:\\www.genome.jp\dbget-bin\www_bget?map00966
Arginine and proline metabolism	ko00330	10 out of 552 1.81159420289855%	415 out of 32833 1.26397222306825%	0.164146	1	BnaA03G0540000ZS;BnaA06G0315600ZS;BnaA03G0054600ZS;novel.417;novel.533;novel.640;BnaC09G0030600ZS;BnaA09G0045000ZS;BnaC04G0431300ZS;BnaA03G0591400ZS	K00128+K00472+K13366+K14085+K14085+K14085+K14329+K14329+K14329+K14454	https:\\www.genome.jp\dbget-bin\www_bget?map00330
Protein export	ko03060	8 out of 552 1.44927536231884%	323 out of 32833 0.983766332653123%	0.179431	1	BnaA08G0223200ZS;BnaA09G0433100ZS;BnaC05G0231500ZS;novel.9420;BnaA06G0273000ZS;BnaA04G0288800ZS;BnaC04G0607200ZS;BnaA01G0338800ZS	K03070+K03070+K03070+K03106+K03107+K03110+K03110+K10956	https:\\www.genome.jp\dbget-bin\www_bget?map03060
Indole alkaloid biosynthesis	ko00901	3 out of 552 0.543478260869565%	88 out of 32833 0.268023025614473%	0.184729	1	BnaC08G0368700ZS;BnaA01G0207400ZS;BnaC04G0476800ZS	K01757+K01757+K01757	https:\\www.genome.jp\dbget-bin\www_bget?map00901
Tyrosine metabolism	ko00350	6 out of 552 1.08695652173913%	229 out of 32833 0.697469009837663%	0.189804	1	BnaA03G0553300ZS;BnaC02G0357300ZS;BnaC07G0529600ZS;BnaA01G0083700ZS;BnaC04G0237200ZS;BnaA03G0591400ZS	K00276+K00276+K00276+K01592+K01800+K14454	https:\\www.genome.jp\dbget-bin\www_bget?map00350
Benzoxazinoid biosynthesis	ko00402	2 out of 552 0.36231884057971%	51 out of 32833 0.155331526208388%	0.211486	1	BnaC03G0090500ZS;novel.5847	K13229+K13229	https:\\www.genome.jp\dbget-bin\www_bget?map00402
Phosphonate and phosphinate metabolism	ko00440	2 out of 552 0.36231884057971%	52 out of 32833 0.158377242408552%	0.217665	1	BnaC08G0224100ZS;BnaA09G0640200ZS	K00993+K00993	https:\\www.genome.jp\dbget-bin\www_bget?map00440
Alanine, aspartate and glutamate metabolism	ko00250	7 out of 552 1.26811594202899%	291 out of 32833 0.88630341424786%	0.220186	1	BnaC01G0508900ZS;BnaA03G0377500ZS;novel.1320;BnaA09G0220100ZS;BnaC09G0498800ZS;BnaC01G0424200ZS;BnaA03G0591400ZS	K00261+K00820+K00827+K01580+K01915+K13051+K14454	https:\\www.genome.jp\dbget-bin\www_bget?map00250
Ether lipid metabolism	ko00565	4 out of 552 0.72463768115942%	144 out of 32833 0.438583132823683%	0.224354	1	BnaC08G0224100ZS;BnaA09G0640200ZS;BnaC01G0506700ZS;BnaC02G0014700ZS	K00993+K00993+K01114+K14674	https:\\www.genome.jp\dbget-bin\www_bget?map00565
Ubiquitin mediated proteolysis	ko04120	18 out of 552 3.26086956521739%	883 out of 32833 2.68936740474523%	0.234166	1	BnaC04G0280900ZS;BnaA08G0243600ZS;novel.5983;BnaA09G0071100ZS;BnaC08G0326200ZS;BnaA03G0172600ZS;BnaA03G0425600ZS;BnaA04G0230300ZS;BnaA06G0296500ZS;BnaA09G0488400ZS;BnaC01G0493100ZS;BnaC03G0200400ZS;BnaC03G0529400ZS;BnaC05G0252300ZS;BnaC05G0411300ZS;BnaC07G0398800ZS;BnaC06G0437600ZS;BnaC07G0531700ZS	K03094+K03875+K08770+K10143+K10260+K10260+K10260+K10260+K10260+K10260+K10260+K10260+K10260+K10260+K10260+K10260+K10570+K10688	https:\\www.genome.jp\dbget-bin\www_bget?map04120
Fatty acid elongation	ko00062	4 out of 552 0.72463768115942%	152 out of 32833 0.462948862424999%	0.253289	1	BnaA06G0045100ZS;BnaA07G0137900ZS;BnaA09G0597100ZS;BnaC01G0025600ZS	K15397+K15397+K15397+K15397	https:\\www.genome.jp\dbget-bin\www_bget?map00062
Vitamin B6 metabolism	ko00750	2 out of 552 0.36231884057971%	61 out of 32833 0.185788688210033%	0.273715	1	BnaA02G0098300ZS;BnaA08G0260500ZS	K08681+K13248	https:\\www.genome.jp\dbget-bin\www_bget?map00750
Autophagy - other	ko04136	5 out of 552 0.905797101449275%	212 out of 32833 0.645691834434867%	0.28574	1	BnaA03G0463600ZS;BnaA05G0466100ZS;BnaC04G0603300ZS;BnaC06G0210300ZS;BnaA03G0519300ZS	K08341+K08341+K08341+K08341+K17908	https:\\www.genome.jp\dbget-bin\www_bget?map04136
Isoflavonoid biosynthesis	ko00943	2 out of 552 0.36231884057971%	63 out of 32833 0.191880120610362%	0.286191	1	BnaA08G0317300ZS;BnaC08G0007500ZS	K13264+K13264	https:\\www.genome.jp\dbget-bin\www_bget?map00943
Monoterpenoid biosynthesis	ko00902	1 out of 552 0.181159420289855%	20 out of 32833 0.0609143240032894%	0.287663	1	BnaC03G0283300ZS	K12467	https:\\www.genome.jp\dbget-bin\www_bget?map00902
Glutathione metabolism	ko00480	10 out of 552 1.81159420289855%	479 out of 32833 1.45889805987878%	0.288083	1	BnaA02G0068400ZS;BnaA02G0212100ZS;BnaA02G0255100ZS;BnaA03G0229900ZS;BnaA10G0014800ZS;BnaA10G0196600ZS;BnaC02G0078600ZS;BnaC02G0345000ZS;BnaC03G0173400ZS;BnaC05G0016900ZS	K00799+K00799+K00799+K00799+K00799+K00799+K00799+K00799+K00799+K00799	https:\\www.genome.jp\dbget-bin\www_bget?map00480
Lysine degradation	ko00310	6 out of 552 1.08695652173913%	272 out of 32833 0.828434806444735%	0.308629	1	BnaA03G0540000ZS;BnaC04G0458700ZS;BnaA06G0418200ZS;novel.417;novel.533;novel.640	K00128+K00306+K11420+K14085+K14085+K14085	https:\\www.genome.jp\dbget-bin\www_bget?map00310
Pantothenate and CoA biosynthesis	ko00770	5 out of 552 0.905797101449275%	221 out of 32833 0.673103280236348%	0.315108	1	BnaA03G0540000ZS;BnaC08G0352200ZS;BnaA08G0158400ZS;BnaA09G0510700ZS;BnaC03G0778100ZS	K00128+K01513+K01513+K01513+K01513	https:\\www.genome.jp\dbget-bin\www_bget?map00770
Linoleic acid metabolism	ko00591	2 out of 552 0.36231884057971%	70 out of 32833 0.213200134011513%	0.329596	1	BnaC08G0240500ZS;BnaC02G0014700ZS	K00454+K14674	https:\\www.genome.jp\dbget-bin\www_bget?map00591
Isoquinoline alkaloid biosynthesis	ko00950	5 out of 552 0.905797101449275%	227 out of 32833 0.691377577437334%	0.3349	1	BnaA03G0553300ZS;BnaC02G0357300ZS;BnaC07G0529600ZS;BnaA01G0083700ZS;BnaA03G0591400ZS	K00276+K00276+K00276+K01592+K14454	https:\\www.genome.jp\dbget-bin\www_bget?map00950
Histidine metabolism	ko00340	4 out of 552 0.72463768115942%	182 out of 32833 0.554320348429933%	0.366309	1	BnaA03G0540000ZS;novel.417;novel.533;novel.640	K00128+K14085+K14085+K14085	https:\\www.genome.jp\dbget-bin\www_bget?map00340
Photosynthesis - antenna proteins	ko00196	2 out of 552 0.36231884057971%	81 out of 32833 0.246703012213322%	0.396127	1	BnaA03G0582000ZS;BnaC02G0001800ZS	K08909+K08915	https:\\www.genome.jp\dbget-bin\www_bget?map00196
Lysine biosynthesis	ko00300	2 out of 552 0.36231884057971%	92 out of 32833 0.280205890415131%	0.459467	1	BnaC02G0163200ZS;BnaA09G0497500ZS	K00928+K01778	https:\\www.genome.jp\dbget-bin\www_bget?map00300
Galactose metabolism	ko00052	10 out of 552 1.81159420289855%	562 out of 32833 1.71169250449243%	0.472459	1	BnaA08G0214700ZS;BnaC01G0505700ZS;BnaA09G0154800ZS;BnaA03G0476700ZS;BnaC07G0455000ZS;BnaA09G0681800ZS;BnaA02G0286300ZS;novel.9905;BnaC08G0526000ZS;BnaC09G0202600ZS	K00850+K00963+K01193+K01784+K01784+K01835+K12309+K12447+K18819+K18819	https:\\www.genome.jp\dbget-bin\www_bget?map00052
Pentose and glucuronate interconversions	ko00040	17 out of 552 3.07971014492754%	979 out of 32833 2.98175615996101%	0.480556	1	BnaC01G0505700ZS;BnaC09G0009300ZS;BnaC09G0168300ZS;BnaA01G0353900ZS;BnaA02G0033400ZS;BnaA04G0022400ZS;BnaA05G0408200ZS;BnaA06G0009600ZS;BnaA09G0024600ZS;BnaA09G0153800ZS;BnaC01G0473100ZS;BnaC07G0463000ZS;BnaA09G0584900ZS;BnaC07G0513800ZS;BnaA03G0014300ZS;BnaC03G0018500ZS;novel.9905	K00963+K01051+K01051+K01051+K01051+K01051+K01051+K01051+K01051+K01051+K01051+K01051+K01184+K01184+K01728+K01728+K12447	https:\\www.genome.jp\dbget-bin\www_bget?map00040
Tropane, piperidine and pyridine alkaloid biosynthesis	ko00960	4 out of 552 0.72463768115942%	215 out of 32833 0.654828983035361%	0.489418	1	BnaA03G0553300ZS;BnaC02G0357300ZS;BnaC07G0529600ZS;BnaA03G0591400ZS	K00276+K00276+K00276+K14454	https:\\www.genome.jp\dbget-bin\www_bget?map00960
Porphyrin and chlorophyll metabolism	ko00860	4 out of 552 0.72463768115942%	217 out of 32833 0.66092041543569%	0.496603	1	BnaA03G0585900ZS;BnaA03G0258700ZS;BnaA03G0469700ZS;BnaC03G0307700ZS	K02492+K22013+K22013+K22013	https:\\www.genome.jp\dbget-bin\www_bget?map00860
Limonene and pinene degradation	ko00903	1 out of 552 0.181159420289855%	41 out of 32833 0.124874364206743%	0.501222	1	BnaA03G0540000ZS	K00128	https:\\www.genome.jp\dbget-bin\www_bget?map00903
Metabolic pathways	ko01100	231 out of 552 41.8478260869565%	13753 out of 32833 41.8877349008619%	0.524078	1	BnaA02G0407800ZS;BnaC02G0541900ZS;BnaA06G0339400ZS;BnaA08G0190200ZS;BnaC03G0683500ZS;BnaA09G0516900ZS;BnaC02G0065000ZS;BnaA03G0540000ZS;BnaC03G0573400ZS;BnaC01G0508900ZS;BnaA03G0553300ZS;BnaC02G0357300ZS;BnaC07G0529600ZS;BnaC04G0458700ZS;BnaC08G0294600ZS;BnaA01G0376700ZS;BnaA03G0523200ZS;BnaC02G0098000ZS;BnaC04G0562000ZS;novel.9468;BnaC08G0240500ZS;BnaA09G0123600ZS;BnaA06G0315600ZS;BnaA09G0068700…	K00020+K00020+K00029+K00083+K00083+K00108+K00122+K00128+K00130+K00261+K00276+K00276+K00276+K00306+K00430+K00430+K00430+K00430+K00430+K00430+K00454+K00469+K00472+K00511+K00511+K00511+K00558+K00559+K00616+K00616+K00655+K00679+K00679+K00679+K00695+K00695+K00695+K00695+K00696+K00737+K00799+K00799+K00799+K00799+K00799+K00799+K00799+K00799+K00799+K00799+K00820+K00827+K00850+K00873+K00901+K00928+K00963+…	https:\\www.genome.jp\dbget-bin\www_bget?map01100
2-Oxocarboxylic acid metabolism	ko01210	6 out of 552 1.08695652173913%	349 out of 32833 1.0629549538574%	0.534771	1	BnaC02G0163200ZS;BnaA08G0192100ZS;BnaA06G0110600ZS;BnaC05G0136700ZS;BnaA03G0591400ZS;novel.8786	K00928+K11812+K12154+K12154+K14454+K15741	https:\\www.genome.jp\dbget-bin\www_bget?map01210
Phenylalanine metabolism	ko00360	4 out of 552 0.72463768115942%	233 out of 32833 0.709651874638321%	0.5524	1	BnaA03G0553300ZS;BnaC02G0357300ZS;BnaC07G0529600ZS;BnaA03G0591400ZS	K00276+K00276+K00276+K14454	https:\\www.genome.jp\dbget-bin\www_bget?map00360
Amino sugar and nucleotide sugar metabolism	ko00520	16 out of 552 2.89855072463768%	970 out of 32833 2.95434471415953%	0.566471	1	BnaA03G0377500ZS;BnaC01G0505700ZS;BnaC05G0118100ZS;BnaC09G0204800ZS;BnaA01G0105700ZS;BnaA05G0092600ZS;BnaA09G0180300ZS;BnaC04G0595000ZS;BnaA03G0476700ZS;BnaC07G0455000ZS;BnaC02G0209100ZS;BnaA09G0681800ZS;BnaA09G0497000ZS;novel.9905;BnaA04G0289000ZS;BnaA03G0328200ZS	K00820+K00963+K00975+K01183+K01183+K01183+K01183+K01183+K01784+K01784+K01809+K01835+K08678+K12447+K17497+K20547	https:\\www.genome.jp\dbget-bin\www_bget?map00520
Arginine biosynthesis	ko00220	3 out of 552 0.543478260869565%	176 out of 32833 0.536046051228946%	0.569983	1	BnaC01G0508900ZS;BnaC09G0498800ZS;BnaA03G0591400ZS	K00261+K01915+K14454	https:\\www.genome.jp\dbget-bin\www_bget?map00220
Taurine and hypotaurine metabolism	ko00430	1 out of 552 0.181159420289855%	52 out of 32833 0.158377242408552%	0.586197	1	BnaA09G0220100ZS	K01580	https:\\www.genome.jp\dbget-bin\www_bget?map00430
Purine metabolism	ko00230	9 out of 552 1.6304347826087%	557 out of 32833 1.69646392349161%	0.59423	1	BnaC08G0499200ZS;BnaA04G0157300ZS;BnaC08G0352200ZS;BnaA08G0158400ZS;BnaA09G0510700ZS;BnaC03G0778100ZS;BnaA09G0681800ZS;BnaA01G0404500ZS;BnaC07G0413000ZS	K00873+K01081+K01513+K01513+K01513+K01513+K01835+K14641+K14977	https:\\www.genome.jp\dbget-bin\www_bget?map00230
alpha-Linolenic acid metabolism	ko00592	4 out of 552 0.72463768115942%	250 out of 32833 0.761429050041117%	0.607902	1	BnaC08G0240500ZS;BnaC05G0560400ZS;BnaC02G0014700ZS;BnaA07G0085000ZS	K00454+K10529+K14674+K16818	https:\\www.genome.jp\dbget-bin\www_bget?map00592
Monobactam biosynthesis	ko00261	1 out of 552 0.181159420289855%	56 out of 32833 0.17056010720921%	0.613375	1	BnaC02G0163200ZS	K00928	https:\\www.genome.jp\dbget-bin\www_bget?map00261
Pentose phosphate pathway	ko00030	5 out of 552 0.905797101449275%	326 out of 32833 0.992903481253617%	0.642608	1	BnaA03G0053300ZS;BnaC03G0061300ZS;BnaA08G0214700ZS;BnaC07G0265900ZS;BnaA09G0681800ZS	K00616+K00616+K00850+K01807+K01835	https:\\www.genome.jp\dbget-bin\www_bget?map00030
Phosphatidylinositol signaling system	ko04070	7 out of 552 1.26811594202899%	471 out of 32833 1.43453233027746%	0.680338	1	BnaA01G0044000ZS;BnaA03G0590300ZS;BnaA02G0351200ZS;BnaA04G0109300ZS;BnaC04G0392100ZS;BnaA07G0262700ZS;BnaA10G0057700ZS	K00901+K00981+K02183+K02183+K02183+K20279+K20279	https:\\www.genome.jp\dbget-bin\www_bget?map04070
Fatty acid degradation	ko00071	4 out of 552 0.72463768115942%	277 out of 32833 0.843663387445558%	0.686863	1	BnaA03G0540000ZS;novel.417;novel.533;novel.640	K00128+K14085+K14085+K14085	https:\\www.genome.jp\dbget-bin\www_bget?map00071
Tryptophan metabolism	ko00380	7 out of 552 1.26811594202899%	476 out of 32833 1.44976091127829%	0.690809	1	BnaA03G0540000ZS;BnaA08G0192100ZS;novel.417;novel.533;novel.640;BnaC03G0740100ZS;BnaA06G0091200ZS	K00128+K11812+K14085+K14085+K14085+K22588+K23947	https:\\www.genome.jp\dbget-bin\www_bget?map00380
Arachidonic acid metabolism	ko00590	2 out of 552 0.36231884057971%	145 out of 32833 0.441628849023848%	0.702963	1	BnaC02G0014700ZS;BnaA01G0406700ZS	K14674+K15730	https:\\www.genome.jp\dbget-bin\www_bget?map00590
Glycosylphosphatidylinositol (GPI)-anchor biosynthesis	ko00563	2 out of 552 0.36231884057971%	146 out of 32833 0.444674565224012%	0.706536	1	BnaA02G0058500ZS;BnaA02G0212500ZS	K03860+K03860	https:\\www.genome.jp\dbget-bin\www_bget?map00563
Cutin, suberine and wax biosynthesis	ko00073	4 out of 552 0.72463768115942%	288 out of 32833 0.877166265647367%	0.715623	1	novel.3690;BnaA05G0108500ZS;BnaC04G0135700ZS;BnaA06G0441300ZS	K15405+K17991+K17991+K20769	https:\\www.genome.jp\dbget-bin\www_bget?map00073
Ascorbate and aldarate metabolism	ko00053	6 out of 552 1.08695652173913%	436 out of 32833 1.32793226327171%	0.743542	1	BnaA03G0540000ZS;BnaA09G0123600ZS;novel.9905;novel.417;novel.533;novel.640	K00128+K00469+K12447+K14085+K14085+K14085	https:\\www.genome.jp\dbget-bin\www_bget?map00053
Photosynthesis	ko00195	4 out of 552 0.72463768115942%	312 out of 32833 0.950263454451314%	0.771519	1	BnaA03G0233500ZS;BnaA03G0578600ZS;BnaC03G0276000ZS;BnaC04G0173200ZS	K02639+K02639+K02639+K02721	https:\\www.genome.jp\dbget-bin\www_bget?map00195
Fructose and mannose metabolism	ko00051	5 out of 552 0.905797101449275%	387 out of 32833 1.17869216946365%	0.781059	1	BnaA08G0214700ZS;BnaC02G0209100ZS;BnaA04G0289000ZS;BnaA10G0010400ZS;BnaC05G0012300ZS	K00850+K01809+K17497+K19355+K19355	https:\\www.genome.jp\dbget-bin\www_bget?map00051
Phenylalanine, tyrosine and tryptophan biosynthesis	ko00400	3 out of 552 0.543478260869565%	250 out of 32833 0.761429050041117%	0.793737	1	BnaC04G0420900ZS;Bnascaffold1753G0000100ZS;BnaA03G0591400ZS	K06001+K13832+K14454	https:\\www.genome.jp\dbget-bin\www_bget?map00400
Betalain biosynthesis	ko00965	1 out of 552 0.181159420289855%	104 out of 32833 0.316754484817105%	0.829009	1	BnaA01G0142400ZS	K15777	https:\\www.genome.jp\dbget-bin\www_bget?map00965
Basal transcription factors	ko03022	3 out of 552 0.543478260869565%	270 out of 32833 0.822343374044406%	0.834305	1	BnaA02G0408600ZS;BnaC02G0543300ZS;BnaC09G0283100ZS	K03122+K03122+K03138	https:\\www.genome.jp\dbget-bin\www_bget?map03022
ABC transporters	ko02010	4 out of 552 0.72463768115942%	356 out of 32833 1.08427496725855%	0.85119	1	BnaA07G0219300ZS;BnaA08G0321900ZS;BnaA09G0426500ZS;BnaC02G0024400ZS	K05658+K05658+K05658+K05681	https:\\www.genome.jp\dbget-bin\www_bget?map02010
Stilbenoid, diarylheptanoid and gingerol biosynthesis	ko00945	1 out of 552 0.181159420289855%	113 out of 32833 0.344165930618585%	0.853283	1	novel.8218	K09754	https:\\www.genome.jp\dbget-bin\www_bget?map00945
Butanoate metabolism	ko00650	1 out of 552 0.181159420289855%	117 out of 32833 0.356348795419243%	0.862937	1	BnaA09G0220100ZS	K01580	https:\\www.genome.jp\dbget-bin\www_bget?map00650
Glyoxylate and dicarboxylate metabolism	ko00630	5 out of 552 0.905797101449275%	449 out of 32833 1.36752657387385%	0.875313	1	BnaC02G0065000ZS;BnaC09G0498800ZS;novel.6126;BnaA06G0081800ZS;BnaC04G0284000ZS	K00122+K01915+K11517+K15919+K22133	https:\\www.genome.jp\dbget-bin\www_bget?map00630
SNARE interactions in vesicular transport	ko04130	2 out of 552 0.36231884057971%	217 out of 32833 0.66092041543569%	0.881925	1	BnaA03G0325200ZS;BnaC03G0390000ZS	K08486+K08486	https:\\www.genome.jp\dbget-bin\www_bget?map04130
Inositol phosphate metabolism	ko00562	5 out of 552 0.905797101449275%	458 out of 32833 1.39493801967533%	0.885635	1	BnaA09G0123600ZS;BnaC01G0506700ZS;BnaA01G0007900ZS;BnaA07G0262700ZS;BnaA10G0057700ZS	K00469+K01114+K01858+K20279+K20279	https:\\www.genome.jp\dbget-bin\www_bget?map00562
Sphingolipid metabolism	ko00600	3 out of 552 0.543478260869565%	311 out of 32833 0.94721773825115%	0.896439	1	BnaC08G0227900ZS;BnaA02G0286300ZS;BnaA04G0244600ZS	K04713+K12309+K12349	https:\\www.genome.jp\dbget-bin\www_bget?map00600
Terpenoid backbone biosynthesis	ko00900	2 out of 552 0.36231884057971%	236 out of 32833 0.718789023238815%	0.908697	1	BnaA07G0384300ZS;BnaA02G0108800ZS	K01823+K11778	https:\\www.genome.jp\dbget-bin\www_bget?map00900
Mismatch repair	ko03430	6 out of 552 1.08695652173913%	562 out of 32833 1.71169250449243%	0.912683	1	BnaC09G0172000ZS;BnaA09G0202700ZS;BnaC05G0406900ZS;novel.11;novel.1923;BnaA01G0411800ZS	K07466+K07466+K07466+K07466+K07466+K10739	https:\\www.genome.jp\dbget-bin\www_bget?map03430
Selenocompound metabolism	ko00450	1 out of 552 0.181159420289855%	145 out of 32833 0.441628849023848%	0.914904	1	BnaA06G0015200ZS	K00384	https:\\www.genome.jp\dbget-bin\www_bget?map00450
Pyruvate metabolism	ko00620	6 out of 552 1.08695652173913%	574 out of 32833 1.74824109889441%	0.922043	1	BnaA06G0339400ZS;BnaA03G0540000ZS;BnaC08G0499200ZS;novel.417;novel.533;novel.640	K00029+K00128+K00873+K14085+K14085+K14085	https:\\www.genome.jp\dbget-bin\www_bget?map00620
N-Glycan biosynthesis	ko00510	2 out of 552 0.36231884057971%	250 out of 32833 0.761429050041117%	0.924669	1	BnaC06G0317200ZS;BnaC08G0157700ZS	K00737+K07441	https:\\www.genome.jp\dbget-bin\www_bget?map00510
Ribosome biogenesis in eukaryotes	ko03008	7 out of 552 1.26811594202899%	654 out of 32833 1.99189839490756%	0.924957	1	novel.10084;novel.372;BnaA01G0075800ZS;BnaA03G0512700ZS;BnaC01G0089700ZS;BnaC07G0491700ZS;BnaA08G0069800ZS	K06943+K06943+K07936+K07936+K07936+K07936+K14548	https:\\www.genome.jp\dbget-bin\www_bget?map03008
Glycosphingolipid biosynthesis - ganglio series	ko00604	1 out of 552 0.181159420289855%	153 out of 32833 0.465994578625164%	0.925744	1	BnaA02G0286300ZS	K12309	https:\\www.genome.jp\dbget-bin\www_bget?map00604
Nucleotide excision repair	ko03420	7 out of 552 1.26811594202899%	657 out of 32833 2.00103554350806%	0.92697	1	BnaC09G0172000ZS;BnaA09G0202700ZS;BnaC05G0406900ZS;novel.11;novel.1923;BnaC06G0437600ZS;BnaA01G0411800ZS	K07466+K07466+K07466+K07466+K07466+K10570+K10739	https:\\www.genome.jp\dbget-bin\www_bget?map03420
Glycolysis / Gluconeogenesis	ko00010	8 out of 552 1.44927536231884%	732 out of 32833 2.22946425852039%	0.927026	1	BnaA03G0540000ZS;BnaA08G0214700ZS;BnaC08G0499200ZS;BnaC01G0195300ZS;BnaA09G0681800ZS;novel.417;novel.533;novel.640	K00128+K00850+K00873+K01792+K01835+K14085+K14085+K14085	https:\\www.genome.jp\dbget-bin\www_bget?map00010
Cysteine and methionine metabolism	ko00270	6 out of 552 1.08695652173913%	594 out of 32833 1.80915542289769%	0.935701	1	BnaC02G0313600ZS;novel.1320;BnaC02G0163200ZS;BnaA03G0591400ZS;BnaC09G0295000ZS;BnaA09G0250600ZS	K00558+K00827+K00928+K14454+K20772+K20772	https:\\www.genome.jp\dbget-bin\www_bget?map00270
Peroxisome	ko04146	4 out of 552 0.72463768115942%	435 out of 32833 1.32488654707154%	0.935982	1	BnaC04G0458700ZS;BnaC03G0728900ZS;novel.6126;BnaA09G0105800ZS	K00306+K11147+K11517+K13348	https:\\www.genome.jp\dbget-bin\www_bget?map04146
Various types of N-glycan biosynthesis	ko00513	1 out of 552 0.181159420289855%	167 out of 32833 0.508634605427466%	0.941503	1	BnaC08G0157700ZS	K07441	https:\\www.genome.jp\dbget-bin\www_bget?map00513
Glycosaminoglycan degradation	ko00531	1 out of 552 0.181159420289855%	172 out of 32833 0.523863186428289%	0.946281	1	BnaA02G0286300ZS	K12309	https:\\www.genome.jp\dbget-bin\www_bget?map00531
Protein processing in endoplasmic reticulum	ko04141	14 out of 552 2.53623188405797%	1211 out of 32833 3.68836231839917%	0.947707	1	BnaC04G0280900ZS;BnaA03G0572200ZS;novel.5134;novel.1726;BnaC09G0007200ZS;BnaA01G0392800ZS;BnaA08G0321700ZS;BnaA09G0023000ZS;BnaC01G0486300ZS;BnaA01G0338800ZS;BnaA06G0182500ZS;BnaA08G0011400ZS;BnaA10G0231100ZS;BnaA01G0387100ZS	K03094+K03283+K03283+K03283+K10661+K10661+K10661+K10661+K10661+K10956+K13993+K13993+K13993+K14007	https:\\www.genome.jp\dbget-bin\www_bget?map04141
DNA replication	ko03030	6 out of 552 1.08695652173913%	627 out of 32833 1.90966405750312%	0.953644	1	BnaC09G0172000ZS;BnaA09G0202700ZS;BnaC05G0406900ZS;novel.11;novel.1923;BnaA01G0411800ZS	K07466+K07466+K07466+K07466+K07466+K10739	https:\\www.genome.jp\dbget-bin\www_bget?map03030
Sulfur metabolism	ko00920	1 out of 552 0.181159420289855%	182 out of 32833 0.554320348429933%	0.954701	1	BnaC08G0115600ZS	K17285	https:\\www.genome.jp\dbget-bin\www_bget?map00920
Carbon fixation in photosynthetic organisms	ko00710	3 out of 552 0.543478260869565%	380 out of 32833 1.1573721560625%	0.95541	1	BnaA06G0339400ZS;BnaC07G0265900ZS;BnaA03G0591400ZS	K00029+K01807+K14454	https:\\www.genome.jp\dbget-bin\www_bget?map00710
Homologous recombination	ko03440	7 out of 552 1.26811594202899%	723 out of 32833 2.20205281271891%	0.96077	1	BnaC09G0172000ZS;BnaA09G0202700ZS;BnaC05G0406900ZS;novel.11;novel.1923;BnaA01G0411800ZS;BnaA01G0025500ZS	K07466+K07466+K07466+K07466+K07466+K10739+K12173	https:\\www.genome.jp\dbget-bin\www_bget?map03440
Base excision repair	ko03410	1 out of 552 0.181159420289855%	207 out of 32833 0.630463253434045%	0.970427	1	BnaC05G0475600ZS	K01246	https:\\www.genome.jp\dbget-bin\www_bget?map03410
mRNA surveillance pathway	ko03015	6 out of 552 1.08695652173913%	678 out of 32833 2.06499558371151%	0.972628	1	BnaA04G0191400ZS;BnaA09G0486100ZS;BnaC04G0495500ZS;BnaC09G0244900ZS;BnaA03G0446400ZS;BnaC07G0421200ZS	K13126+K13126+K13126+K14326+K14396+K14396	https:\\www.genome.jp\dbget-bin\www_bget?map03015
Fatty acid biosynthesis	ko00061	1 out of 552 0.181159420289855%	213 out of 32833 0.648737550635032%	0.973305	1	novel.400	K10782	https:\\www.genome.jp\dbget-bin\www_bget?map00061
Endocytosis	ko04144	10 out of 552 1.81159420289855%	1012 out of 32833 3.08226479456644%	0.976578	1	BnaA03G0572200ZS;novel.5134;novel.1726;BnaC06G0369700ZS;BnaC09G0053000ZS;BnaA08G0033400ZS;BnaC09G0401700ZS;BnaA06G0273100ZS;BnaA07G0168700ZS;BnaC06G0159100ZS	K03283+K03283+K03283+K07904+K12472+K12472+K12486+K12489+K12489+K12489	https:\\www.genome.jp\dbget-bin\www_bget?map04144
Ubiquinone and other terpenoid-quinone biosynthesis	ko00130	1 out of 552 0.181159420289855%	224 out of 32833 0.682240428836841%	0.977875	1	BnaC09G0369200ZS	K03809	https:\\www.genome.jp\dbget-bin\www_bget?map00130
Biosynthesis of amino acids	ko01230	13 out of 552 2.35507246376812%	1288 out of 32833 3.92288246581184%	0.984377	1	BnaA03G0053300ZS;BnaC03G0061300ZS;BnaA08G0214700ZS;BnaC08G0499200ZS;BnaC02G0163200ZS;BnaC05G0064400ZS;novel.2431;BnaA09G0497500ZS;BnaC07G0265900ZS;BnaC09G0498800ZS;BnaC04G0420900ZS;Bnascaffold1753G0000100ZS;BnaA03G0591400ZS	K00616+K00616+K00850+K00873+K00928+K01620+K01620+K01778+K01807+K01915+K06001+K13832+K14454	https:\\www.genome.jp\dbget-bin\www_bget?map01230
Spliceosome	ko03040	12 out of 552 2.17391304347826%	1228 out of 32833 3.74013949380197%	0.986517	1	BnaA03G0572200ZS;novel.5134;novel.1726;BnaA09G0611900ZS;BnaA04G0297700ZS;BnaA07G0271900ZS;BnaA05G0017400ZS;BnaA06G0283900ZS;BnaA06G0284000ZS;novel.1052;novel.537;BnaA03G0053100ZS	K03283+K03283+K03283+K12825+K12835+K12835+K12842+K12867+K12867+K12869+K12891+K12900	https:\\www.genome.jp\dbget-bin\www_bget?map03040
Biosynthesis of cofactors	ko01240	13 out of 552 2.35507246376812%	1308 out of 32833 3.98379678981513%	0.986868	1	BnaA03G0540000ZS;BnaC08G0499200ZS;BnaC01G0505700ZS;BnaC02G0209100ZS;BnaA01G0365800ZS;BnaC07G0433200ZS;BnaA03G0585900ZS;BnaC09G0369200ZS;BnaA02G0098300ZS;BnaA08G0260500ZS;BnaA01G0148500ZS;BnaC01G0188400ZS;BnaA04G0289000ZS	K00128+K00873+K00963+K01809+K01937+K01937+K02492+K03809+K08681+K13248+K13800+K13800+K17497	https:\\www.genome.jp\dbget-bin\www_bget?map01240
Citrate cycle (TCA cycle)	ko00020	1 out of 552 0.181159420289855%	274 out of 32833 0.834526238845064%	0.990584	1	BnaA08G0294700ZS	K01648	https:\\www.genome.jp\dbget-bin\www_bget?map00020
RNA transport	ko03013	10 out of 552 1.81159420289855%	1113 out of 32833 3.38988213078305%	0.99097	1	BnaC04G0415100ZS;BnaA01G0075800ZS;BnaA03G0512700ZS;BnaC01G0089700ZS;BnaC07G0491700ZS;BnaA04G0191400ZS;BnaA09G0486100ZS;BnaC04G0495500ZS;BnaA07G0293000ZS;BnaC09G0244900ZS	K03239+K07936+K07936+K07936+K07936+K13126+K13126+K13126+K14308+K14326	https:\\www.genome.jp\dbget-bin\www_bget?map03013
Other glycan degradation	ko00511	1 out of 552 0.181159420289855%	295 out of 32833 0.898486279048518%	0.993425	1	BnaA02G0286300ZS	K12309	https:\\www.genome.jp\dbget-bin\www_bget?map00511
Carbon metabolism	ko01200	11 out of 552 1.99275362318841%	1326 out of 32833 4.03861968141809%	0.997578	1	BnaA06G0339400ZS;BnaC02G0065000ZS;BnaC01G0508900ZS;BnaA03G0053300ZS;BnaC03G0061300ZS;BnaA08G0214700ZS;BnaC08G0499200ZS;BnaC07G0265900ZS;novel.6126;BnaA03G0591400ZS;BnaA06G0081800ZS	K00029+K00122+K00261+K00616+K00616+K00850+K00873+K01807+K11517+K14454+K15919	https:\\www.genome.jp\dbget-bin\www_bget?map01200
Proteasome	ko03050	1 out of 552 0.181159420289855%	380 out of 32833 1.1573721560625%	0.998467	1	BnaA09G0668600ZS	K02725	https:\\www.genome.jp\dbget-bin\www_bget?map03050
Oxidative phosphorylation	ko00190	4 out of 552 0.72463768115942%	844 out of 32833 2.57058447293881%	0.999665	1	BnaA01G0011900ZS;BnaA01G0034400ZS;novel.2780;BnaA01G0410700ZS	K02266+K03884+K08738+K11352	https:\\www.genome.jp\dbget-bin\www_bget?map00190
Aminoacyl-tRNA biosynthesis	ko00970	1 out of 552 0.181159420289855%	489 out of 32833 1.48935522188043%	0.999765	1	BnaC03G0673700ZS	K02433	https:\\www.genome.jp\dbget-bin\www_bget?map00970
Phagosome	ko04145	1 out of 552 0.181159420289855%	490 out of 32833 1.49240093808059%	0.999769	1	BnaA01G0338800ZS	K10956	https:\\www.genome.jp\dbget-bin\www_bget?map04145
Ribosome	ko03010	11 out of 552 1.99275362318841%	1620 out of 32833 4.93406024426644%	0.999904	1	BnaC08G0172900ZS;BnaA06G0277900ZS;novel.4275;BnaA05G0030300ZS;novel.2685;BnaA08G0032800ZS;BnaC08G0039400ZS;novel.9183;novel.3485;BnaA05G0080400ZS;BnaC04G0394200ZS	K02875+K02890+K02894+K02909+K02911+K02961+K02961+K02961+K02961+K02989+K02997	https:\\www.genome.jp\dbget-bin\www_bget?map03010

## Sheet: Sheet6
#KEGG_pathway	ko_id	Cluster_frequency	Genome_frequency	P-value	Corrected_P-value	GeneID	KEGG Orthology	hyperlink
Metabolic pathways	ko01100	75 out of 129 58.1395348837209%	13753 out of 32833 41.8877349008619%	0.000142044	0.0116476	BnaA01G0039900ZS;Bnascaffold2694G0000200ZS;novel.2632;novel.2695;BnaC07G0492600ZS;novel.3844;BnaA06G0395600ZS;BnaC07G0243000ZS;BnaC05G0546700ZS;BnaA07G0138600ZS;BnaA08G0139900ZS;Bnascaffold0511G0000100ZS;BnaA04G0273500ZS;BnaA06G0009600ZS;BnaC02G0418300ZS;BnaC03G0617600ZS;BnaC07G0260100ZS;BnaA04G0263700ZS;BnaA07G0266300ZS;BnaC06G0299200ZS;BnaC01G0129000ZS;BnaC09G0186200ZS;BnaA06G0068800ZS;BnaA09G0…	K00058+K00059+K00430+K00430+K00499+K00588+K00679+K00679+K00799+K00873+K00913+K00963+K01051+K01051+K01051+K01051+K01051+K01097+K01179+K01179+K01183+K01184+K01184+K01184+K01184+K01184+K01426+K01513+K01535+K01535+K01535+K01601+K01601+K01601+K01601+K01647+K01953+K01968+K02433+K02433+K02703+K03841+K03884+K04708+K05349+K05349+K05349+K05573+K05577+K05579+K06119+K06119+K06617+K06617+K08081+K10781+K11153+…	https:\\www.genome.jp\dbget-bin\www_bget?map01100
Pentose and glucuronate interconversions	ko00040	12 out of 129 9.30232558139535%	979 out of 32833 2.98175615996101%	0.00049571	0.0406482	Bnascaffold0511G0000100ZS;BnaA04G0273500ZS;BnaA06G0009600ZS;BnaC02G0418300ZS;BnaC03G0617600ZS;BnaC07G0260100ZS;BnaC09G0186200ZS;BnaA06G0068800ZS;BnaA09G0166700ZS;BnaC01G0172600ZS;BnaC05G0085100ZS;novel.6754	K00963+K01051+K01051+K01051+K01051+K01051+K01184+K01184+K01184+K01184+K01184+K12447	https:\\www.genome.jp\dbget-bin\www_bget?map00040
Riboflavin metabolism	ko00740	4 out of 129 3.10077519379845%	120 out of 32833 0.365485944019736%	0.00131414	0.107759	BnaC01G0091800ZS;BnaA01G0331700ZS;BnaC01G0410100ZS;BnaC05G0425800ZS	K01513+K14379+K14379+K14379	https:\\www.genome.jp\dbget-bin\www_bget?map00740
Carbon fixation in photosynthetic organisms	ko00710	6 out of 129 4.65116279069767%	380 out of 32833 1.1573721560625%	0.00398899	0.327097	novel.7723;novel.70;novel.9847;novel.99;novel.6736;BnaC07G0174000ZS	K01601+K01601+K01601+K01601+K03841+K14272	https:\\www.genome.jp\dbget-bin\www_bget?map00710
Glyoxylate and dicarboxylate metabolism	ko00630	6 out of 129 4.65116279069767%	449 out of 32833 1.36752657387385%	0.00878866	0.72067	novel.7723;novel.70;novel.9847;novel.99;BnaA05G0033900ZS;BnaC07G0174000ZS	K01601+K01601+K01601+K01601+K01647+K14272	https:\\www.genome.jp\dbget-bin\www_bget?map00630
Circadian rhythm - plant	ko04712	5 out of 129 3.87596899224806%	414 out of 32833 1.26092650686809%	0.0240557	1	Bnascaffold0026G0006400ZS;BnaA06G0329000ZS;BnaC07G0364800ZS;BnaA07G0365100ZS;BnaC06G0428800ZS	K12129+K12130+K12130+K16223+K16223	https:\\www.genome.jp\dbget-bin\www_bget?map04712
Vitamin B6 metabolism	ko00750	2 out of 129 1.55038759689922%	61 out of 32833 0.185788688210033%	0.0241025	1	BnaA08G0260500ZS;BnaA09G0616400ZS	K13248+K13248	https:\\www.genome.jp\dbget-bin\www_bget?map00750
Glycerolipid metabolism	ko00561	6 out of 129 4.65116279069767%	588 out of 32833 1.79088112569671%	0.0289332	1	BnaA06G0395600ZS;BnaC07G0243000ZS;BnaC09G0621600ZS;BnaA01G0034300ZS;novel.4710;novel.6691	K00679+K00679+K06119+K06119+K14085+K14085	https:\\www.genome.jp\dbget-bin\www_bget?map00561
Glycine, serine and threonine metabolism	ko00260	5 out of 129 3.87596899224806%	450 out of 32833 1.37057229007401%	0.032773	1	BnaA01G0039900ZS;BnaC07G0492600ZS;novel.4710;novel.6691;BnaC07G0174000ZS	K00058+K00499+K14085+K14085+K14272	https:\\www.genome.jp\dbget-bin\www_bget?map00260
Tryptophan metabolism	ko00380	5 out of 129 3.87596899224806%	476 out of 32833 1.44976091127829%	0.0401555	1	BnaA01G0034200ZS;BnaA09G0706500ZS;novel.4710;novel.6691;BnaC03G0740500ZS	K01426+K11816+K14085+K14085+K22588	https:\\www.genome.jp\dbget-bin\www_bget?map00380
Oxidative phosphorylation	ko00190	7 out of 129 5.42635658914729%	844 out of 32833 2.57058447293881%	0.0493517	1	BnaA06G0406600ZS;BnaA09G0355800ZS;BnaA10G0147500ZS;BnaA01G0034400ZS;BnaA06G0201700ZS;novel.196;BnaA03G0576700ZS	K01535+K01535+K01535+K03884+K05573+K05577+K05579	https:\\www.genome.jp\dbget-bin\www_bget?map00190
Galactose metabolism	ko00052	5 out of 129 3.87596899224806%	562 out of 32833 1.71169250449243%	0.0713024	1	Bnascaffold0511G0000100ZS;BnaA10G0175100ZS;BnaA10G0175300ZS;BnaC03G0131700ZS;novel.6754	K00963+K06617+K06617+K12309+K12447	https:\\www.genome.jp\dbget-bin\www_bget?map00052
Carbon metabolism	ko01200	9 out of 129 6.97674418604651%	1326 out of 32833 4.03861968141809%	0.0780248	1	BnaA01G0039900ZS;BnaA07G0138600ZS;novel.7723;novel.70;novel.9847;novel.99;BnaA05G0033900ZS;novel.6736;BnaC07G0174000ZS	K00058+K00873+K01601+K01601+K01601+K01601+K01647+K03841+K14272	https:\\www.genome.jp\dbget-bin\www_bget?map01200
Sesquiterpenoid and triterpenoid biosynthesis	ko00909	2 out of 129 1.55038759689922%	125 out of 32833 0.380714525020559%	0.086927	1	novel.1677;BnaC09G0479400ZS	K14175+K15799	https:\\www.genome.jp\dbget-bin\www_bget?map00909
Lysine degradation	ko00310	3 out of 129 2.32558139534884%	272 out of 32833 0.828434806444735%	0.0922333	1	Bnascaffold0025G0006300ZS;novel.4710;novel.6691	K11433+K14085+K14085	https:\\www.genome.jp\dbget-bin\www_bget?map00310
Fatty acid elongation	ko00062	2 out of 129 1.55038759689922%	152 out of 32833 0.462948862424999%	0.120409	1	BnaC02G0016700ZS;BnaC04G0195200ZS	K15397+K15397	https:\\www.genome.jp\dbget-bin\www_bget?map00062
Cyanoamino acid metabolism	ko00460	3 out of 129 2.32558139534884%	331 out of 32833 1.00813206225444%	0.141857	1	BnaA04G0005900ZS;BnaC03G0615900ZS;BnaC04G0260600ZS	K05349+K05349+K05349	https:\\www.genome.jp\dbget-bin\www_bget?map00460
Valine, leucine and isoleucine degradation	ko00280	3 out of 129 2.32558139534884%	340 out of 32833 1.03554350805592%	0.150093	1	BnaC06G0147700ZS;novel.4710;novel.6691	K01968+K14085+K14085	https:\\www.genome.jp\dbget-bin\www_bget?map00280
Histidine metabolism	ko00340	2 out of 129 1.55038759689922%	182 out of 32833 0.554320348429933%	0.160581	1	novel.4710;novel.6691	K14085+K14085	https:\\www.genome.jp\dbget-bin\www_bget?map00340
Fatty acid biosynthesis	ko00061	2 out of 129 1.55038759689922%	213 out of 32833 0.648737550635032%	0.204202	1	Bnascaffold2694G0000200ZS;BnaC07G0170500ZS	K00059+K10781	https:\\www.genome.jp\dbget-bin\www_bget?map00061
Arginine and proline metabolism	ko00330	3 out of 129 2.32558139534884%	415 out of 32833 1.26397222306825%	0.223744	1	BnaA01G0034200ZS;novel.4710;novel.6691	K01426+K14085+K14085	https:\\www.genome.jp\dbget-bin\www_bget?map00330
Phenylpropanoid biosynthesis	ko00940	6 out of 129 4.65116279069767%	1067 out of 32833 3.24977918557549%	0.243104	1	novel.2632;novel.2695;novel.3844;BnaA04G0005900ZS;BnaC03G0615900ZS;BnaC04G0260600ZS	K00430+K00430+K00588+K05349+K05349+K05349	https:\\www.genome.jp\dbget-bin\www_bget?map00940
Ascorbate and aldarate metabolism	ko00053	3 out of 129 2.32558139534884%	436 out of 32833 1.32793226327171%	0.245549	1	novel.6754;novel.4710;novel.6691	K12447+K14085+K14085	https:\\www.genome.jp\dbget-bin\www_bget?map00053
Starch and sucrose metabolism	ko00500	7 out of 129 5.42635658914729%	1342 out of 32833 4.08735114062072%	0.276069	1	Bnascaffold0511G0000100ZS;BnaA07G0266300ZS;BnaC06G0299200ZS;BnaC01G0091800ZS;BnaA04G0005900ZS;BnaC03G0615900ZS;BnaC04G0260600ZS	K00963+K01179+K01179+K01513+K05349+K05349+K05349	https:\\www.genome.jp\dbget-bin\www_bget?map00500
Fatty acid degradation	ko00071	2 out of 129 1.55038759689922%	277 out of 32833 0.843663387445558%	0.296887	1	novel.4710;novel.6691	K14085+K14085	https:\\www.genome.jp\dbget-bin\www_bget?map00071
Cutin, suberine and wax biosynthesis	ko00073	2 out of 129 1.55038759689922%	288 out of 32833 0.877166265647367%	0.312801	1	BnaC02G0110800ZS;novel.2139	K13356+K15400	https:\\www.genome.jp\dbget-bin\www_bget?map00073
Alanine, aspartate and glutamate metabolism	ko00250	2 out of 129 1.55038759689922%	291 out of 32833 0.88630341424786%	0.317129	1	BnaA08G0167300ZS;BnaC07G0174000ZS	K01953+K14272	https:\\www.genome.jp\dbget-bin\www_bget?map00250
Glycolysis / Gluconeogenesis	ko00010	4 out of 129 3.10077519379845%	732 out of 32833 2.22946425852039%	0.324624	1	BnaA07G0138600ZS;novel.6736;novel.4710;novel.6691	K00873+K03841+K14085+K14085	https:\\www.genome.jp\dbget-bin\www_bget?map00010
RNA polymerase	ko03020	2 out of 129 1.55038759689922%	306 out of 32833 0.931989157250327%	0.33867	1	novel.1741;novel.2700	K03006+K03006	https:\\www.genome.jp\dbget-bin\www_bget?map03020
Protein processing in endoplasmic reticulum	ko04141	6 out of 129 4.65116279069767%	1211 out of 32833 3.68836231839917%	0.340739	1	BnaA05G0030900ZS;BnaA07G0202600ZS;BnaC03G0570300ZS;BnaA01G0031500ZS;BnaA10G0012700ZS;BnaC05G0014700ZS	K04374+K04374+K10578+K10661+K10661+K10661	https:\\www.genome.jp\dbget-bin\www_bget?map04141
Sphingolipid metabolism	ko00600	2 out of 129 1.55038759689922%	311 out of 32833 0.94721773825115%	0.345807	1	BnaA10G0182100ZS;BnaC03G0131700ZS	K04708+K12309	https:\\www.genome.jp\dbget-bin\www_bget?map00600
beta-Alanine metabolism	ko00410	2 out of 129 1.55038759689922%	311 out of 32833 0.94721773825115%	0.345807	1	novel.4710;novel.6691	K14085+K14085	https:\\www.genome.jp\dbget-bin\www_bget?map00410
Fatty acid metabolism	ko01212	2 out of 129 1.55038759689922%	312 out of 32833 0.950263454451314%	0.347232	1	Bnascaffold2694G0000200ZS;BnaC07G0170500ZS	K00059+K10781	https:\\www.genome.jp\dbget-bin\www_bget?map01212
Biotin metabolism	ko00780	1 out of 129 0.775193798449612%	109 out of 32833 0.331983065817927%	0.349368	1	Bnascaffold2694G0000200ZS	K00059	https:\\www.genome.jp\dbget-bin\www_bget?map00780
Stilbenoid, diarylheptanoid and gingerol biosynthesis	ko00945	1 out of 129 0.775193798449612%	113 out of 32833 0.344165930618585%	0.359567	1	novel.3844	K00588	https:\\www.genome.jp\dbget-bin\www_bget?map00945
Pyruvate metabolism	ko00620	3 out of 129 2.32558139534884%	574 out of 32833 1.74824109889441%	0.392778	1	BnaA07G0138600ZS;novel.4710;novel.6691	K00873+K14085+K14085	https:\\www.genome.jp\dbget-bin\www_bget?map00620
2-Oxocarboxylic acid metabolism	ko01210	2 out of 129 1.55038759689922%	349 out of 32833 1.0629549538574%	0.399126	1	BnaA05G0033900ZS;BnaC07G0174000ZS	K01647+K14272	https:\\www.genome.jp\dbget-bin\www_bget?map01210
Nicotinate and nicotinamide metabolism	ko00760	1 out of 129 0.775193798449612%	130 out of 32833 0.395943106021381%	0.401173	1	BnaC01G0091800ZS	K01513	https:\\www.genome.jp\dbget-bin\www_bget?map00760
Biosynthesis of cofactors	ko01240	6 out of 129 4.65116279069767%	1308 out of 32833 3.98379678981513%	0.408942	1	Bnascaffold2694G0000200ZS;BnaA07G0138600ZS;Bnascaffold0511G0000100ZS;BnaC03G0010600ZS;BnaA08G0260500ZS;BnaA09G0616400ZS	K00059+K00873+K00963+K11153+K13248+K13248	https:\\www.genome.jp\dbget-bin\www_bget?map01240
MAPK signaling pathway - plant	ko04016	8 out of 129 6.2015503875969%	1847 out of 32833 5.62543782170377%	0.440632	1	BnaA07G0171200ZS;BnaC03G0244100ZS;novel.2816;BnaA08G0239000ZS;BnaA09G0560700ZS;novel.3199;BnaC09G0222000ZS;BnaA09G0193100ZS	K02183+K13413+K13416+K20558+K20558+K20727+K20728+K20728	https:\\www.genome.jp\dbget-bin\www_bget?map04016
Glycerophospholipid metabolism	ko00564	3 out of 129 2.32558139534884%	622 out of 32833 1.8944354765023%	0.443015	1	BnaC06G0283000ZS;BnaC01G0493900ZS;BnaC04G0411400ZS	K05929+K18696+K18696	https:\\www.genome.jp\dbget-bin\www_bget?map00564
RNA transport	ko03013	5 out of 129 3.87596899224806%	1113 out of 32833 3.38988213078305%	0.444982	1	BnaC03G0726900ZS;BnaA10G0170600ZS;novel.3603;BnaA04G0191400ZS;novel.938	K03231+K03238+K03238+K13126+K14288	https:\\www.genome.jp\dbget-bin\www_bget?map03013
Glycosphingolipid biosynthesis - ganglio series	ko00604	1 out of 129 0.775193798449612%	153 out of 32833 0.465994578625164%	0.453225	1	BnaC03G0131700ZS	K12309	https:\\www.genome.jp\dbget-bin\www_bget?map00604
Glycosaminoglycan degradation	ko00531	1 out of 129 0.775193798449612%	172 out of 32833 0.523863186428289%	0.492819	1	BnaC03G0131700ZS	K12309	https:\\www.genome.jp\dbget-bin\www_bget?map00531
Arginine biosynthesis	ko00220	1 out of 129 0.775193798449612%	176 out of 32833 0.536046051228946%	0.500785	1	BnaC07G0174000ZS	K14272	https:\\www.genome.jp\dbget-bin\www_bget?map00220
Nitrogen metabolism	ko00910	1 out of 129 0.775193798449612%	181 out of 32833 0.551274632229769%	0.510568	1	BnaA08G0276500ZS	K02575	https:\\www.genome.jp\dbget-bin\www_bget?map00910
Sulfur metabolism	ko00920	1 out of 129 0.775193798449612%	182 out of 32833 0.554320348429933%	0.512501	1	BnaA07G0074300ZS	K17285	https:\\www.genome.jp\dbget-bin\www_bget?map00920
Amino sugar and nucleotide sugar metabolism	ko00520	4 out of 129 3.10077519379845%	970 out of 32833 2.95434471415953%	0.531588	1	Bnascaffold0511G0000100ZS;BnaA04G0263700ZS;BnaC01G0129000ZS;novel.6754	K00963+K01097+K01183+K12447	https:\\www.genome.jp\dbget-bin\www_bget?map00520
Plant hormone signal transduction	ko04075	9 out of 129 6.97674418604651%	2271 out of 32833 6.91682149057351%	0.538763	1	BnaC03G0244100ZS;BnaA06G0013800ZS;BnaC05G0450400ZS;novel.8056;novel.2816;BnaA07G0249100ZS;novel.4253;BnaC03G0743500ZS;BnaC05G0539100ZS	K13413+K13415+K13415+K13415+K13416+K13464+K14487+K14488+K14493	https:\\www.genome.jp\dbget-bin\www_bget?map04075
Inositol phosphate metabolism	ko00562	2 out of 129 1.55038759689922%	458 out of 32833 1.39493801967533%	0.53914	1	BnaA08G0139900ZS;BnaA04G0240500ZS	K00913+K24221	https:\\www.genome.jp\dbget-bin\www_bget?map00562
Phosphatidylinositol signaling system	ko04070	2 out of 129 1.55038759689922%	471 out of 32833 1.43453233027746%	0.554303	1	BnaA08G0139900ZS;BnaA07G0171200ZS	K00913+K02183	https:\\www.genome.jp\dbget-bin\www_bget?map04070
Tropane, piperidine and pyridine alkaloid biosynthesis	ko00960	1 out of 129 0.775193798449612%	215 out of 32833 0.654828983035361%	0.57223	1	BnaA04G0189600ZS	K08081	https:\\www.genome.jp\dbget-bin\www_bget?map00960
Biosynthesis of amino acids	ko01230	5 out of 129 3.87596899224806%	1288 out of 32833 3.92288246581184%	0.574102	1	BnaA01G0039900ZS;BnaA07G0138600ZS;BnaA05G0033900ZS;BnaA08G0167300ZS;BnaC07G0174000ZS	K00058+K00873+K01647+K01953+K14272	https:\\www.genome.jp\dbget-bin\www_bget?map01230
Aminoacyl-tRNA biosynthesis	ko00970	2 out of 129 1.55038759689922%	489 out of 32833 1.48935522188043%	0.574715	1	BnaA08G0197000ZS;BnaC03G0673700ZS	K02433+K02433	https:\\www.genome.jp\dbget-bin\www_bget?map00970
Pantothenate and CoA biosynthesis	ko00770	1 out of 129 0.775193798449612%	221 out of 32833 0.673103280236348%	0.582281	1	BnaC01G0091800ZS	K01513	https:\\www.genome.jp\dbget-bin\www_bget?map00770
Flavonoid biosynthesis	ko00941	1 out of 129 0.775193798449612%	233 out of 32833 0.709651874638321%	0.601687	1	novel.3844	K00588	https:\\www.genome.jp\dbget-bin\www_bget?map00941
Phenylalanine metabolism	ko00360	1 out of 129 0.775193798449612%	233 out of 32833 0.709651874638321%	0.601687	1	BnaA01G0034200ZS	K01426	https:\\www.genome.jp\dbget-bin\www_bget?map00360
Purine metabolism	ko00230	2 out of 129 1.55038759689922%	557 out of 32833 1.69646392349161%	0.645666	1	BnaA07G0138600ZS;BnaC01G0091800ZS	K00873+K01513	https:\\www.genome.jp\dbget-bin\www_bget?map00230
Mismatch repair	ko03430	2 out of 129 1.55038759689922%	562 out of 32833 1.71169250449243%	0.650499	1	BnaA05G0413200ZS;novel.4434	K07466+K07466	https:\\www.genome.jp\dbget-bin\www_bget?map03430
Citrate cycle (TCA cycle)	ko00020	1 out of 129 0.775193798449612%	274 out of 32833 0.834526238845064%	0.661482	1	BnaA05G0033900ZS	K01647	https:\\www.genome.jp\dbget-bin\www_bget?map00020
Other glycan degradation	ko00511	1 out of 129 0.775193798449612%	295 out of 32833 0.898486279048518%	0.688567	1	BnaC03G0131700ZS	K12309	https:\\www.genome.jp\dbget-bin\www_bget?map00511
DNA replication	ko03030	2 out of 129 1.55038759689922%	627 out of 32833 1.90966405750312%	0.708679	1	BnaA05G0413200ZS;novel.4434	K07466+K07466	https:\\www.genome.jp\dbget-bin\www_bget?map03030
Photosynthesis	ko00195	1 out of 129 0.775193798449612%	312 out of 32833 0.950263454451314%	0.708909	1	BnaA01G0425500ZS	K02703	https:\\www.genome.jp\dbget-bin\www_bget?map00195
Biosynthesis of secondary metabolites	ko01110	26 out of 129 20.1550387596899%	7179 out of 32833 21.8651966009807%	0.713598	1	BnaA01G0039900ZS;Bnascaffold2694G0000200ZS;novel.2632;novel.2695;novel.3844;BnaA07G0138600ZS;Bnascaffold0511G0000100ZS;BnaC01G0091800ZS;novel.7723;novel.70;novel.9847;novel.99;BnaA05G0033900ZS;BnaA08G0167300ZS;novel.6736;BnaA04G0005900ZS;BnaC03G0615900ZS;BnaC04G0260600ZS;BnaA04G0189600ZS;novel.6754;novel.4710;novel.6691;BnaC07G0174000ZS;BnaC02G0016700ZS;BnaC04G0195200ZS;BnaC03G0740500ZS	K00058+K00059+K00430+K00430+K00588+K00873+K00963+K01513+K01601+K01601+K01601+K01601+K01647+K01953+K03841+K05349+K05349+K05349+K08081+K12447+K14085+K14085+K14272+K15397+K15397+K22588	https:\\www.genome.jp\dbget-bin\www_bget?map01110
Pentose phosphate pathway	ko00030	1 out of 129 0.775193798449612%	326 out of 32833 0.992903481253617%	0.724667	1	novel.6736	K03841	https:\\www.genome.jp\dbget-bin\www_bget?map00030
Nucleotide excision repair	ko03420	2 out of 129 1.55038759689922%	657 out of 32833 2.00103554350806%	0.732711	1	BnaA05G0413200ZS;novel.4434	K07466+K07466	https:\\www.genome.jp\dbget-bin\www_bget?map03420
Pyrimidine metabolism	ko00240	1 out of 129 0.775193798449612%	361 out of 32833 1.09950354825937%	0.760456	1	BnaC01G0091800ZS	K01513	https:\\www.genome.jp\dbget-bin\www_bget?map00240
Proteasome	ko03050	1 out of 129 0.775193798449612%	380 out of 32833 1.1573721560625%	0.777909	1	BnaC06G0300600ZS	K06699	https:\\www.genome.jp\dbget-bin\www_bget?map03050
Homologous recombination	ko03440	2 out of 129 1.55038759689922%	723 out of 32833 2.20205281271891%	0.779738	1	BnaA05G0413200ZS;novel.4434	K07466+K07466	https:\\www.genome.jp\dbget-bin\www_bget?map03440
Fructose and mannose metabolism	ko00051	1 out of 129 0.775193798449612%	387 out of 32833 1.17869216946365%	0.784016	1	novel.6736	K03841	https:\\www.genome.jp\dbget-bin\www_bget?map00051
RNA degradation	ko03018	2 out of 129 1.55038759689922%	762 out of 32833 2.32083574452533%	0.804016	1	BnaC05G0552200ZS;BnaA04G0191400ZS	K00962+K13126	https:\\www.genome.jp\dbget-bin\www_bget?map03018
Peroxisome	ko04146	1 out of 129 0.775193798449612%	435 out of 32833 1.32488654707154%	0.821633	1	BnaC02G0110800ZS	K13356	https:\\www.genome.jp\dbget-bin\www_bget?map04146
Glutathione metabolism	ko00480	1 out of 129 0.775193798449612%	479 out of 32833 1.45889805987878%	0.850368	1	BnaC05G0546700ZS	K00799	https:\\www.genome.jp\dbget-bin\www_bget?map00480
Phagosome	ko04145	1 out of 129 0.775193798449612%	490 out of 32833 1.49240093808059%	0.856802	1	novel.4595	K01368	https:\\www.genome.jp\dbget-bin\www_bget?map04145
Plant-pathogen interaction	ko04626	8 out of 129 6.2015503875969%	2759 out of 32833 8.40313099625377%	0.85805	1	BnaA07G0171200ZS;BnaC03G0244100ZS;novel.2816;BnaA02G0166600ZS;BnaC02G0016700ZS;BnaC04G0195200ZS;BnaA05G0020600ZS;BnaC05G0154200ZS	K02183+K13413+K13416+K13448+K15397+K15397+K16225+K18878	https:\\www.genome.jp\dbget-bin\www_bget?map04626
Ubiquitin mediated proteolysis	ko04120	2 out of 129 1.55038759689922%	883 out of 32833 2.68936740474523%	0.864957	1	BnaC03G0570300ZS;BnaA07G0234000ZS	K10578+K10580	https:\\www.genome.jp\dbget-bin\www_bget?map04120
Cysteine and methionine metabolism	ko00270	1 out of 129 0.775193798449612%	594 out of 32833 1.80915542289769%	0.905563	1	BnaA01G0039900ZS	K00058	https:\\www.genome.jp\dbget-bin\www_bget?map00270
Ribosome biogenesis in eukaryotes	ko03008	1 out of 129 0.775193798449612%	654 out of 32833 1.99189839490756%	0.925772	1	BnaA09G0371900ZS	K14572	https:\\www.genome.jp\dbget-bin\www_bget?map03008
mRNA surveillance pathway	ko03015	1 out of 129 0.775193798449612%	678 out of 32833 2.06499558371151%	0.932596	1	BnaA04G0191400ZS	K13126	https:\\www.genome.jp\dbget-bin\www_bget?map03015
Spliceosome	ko03040	2 out of 129 1.55038759689922%	1228 out of 32833 3.74013949380197%	0.956279	1	BnaC08G0466300ZS;BnaA09G0163900ZS	K12825+K12837	https:\\www.genome.jp\dbget-bin\www_bget?map03040
Endocytosis	ko04144	1 out of 129 0.775193798449612%	1012 out of 32833 3.08226479456644%	0.98252	1	BnaA08G0109900ZS	K07904	https:\\www.genome.jp\dbget-bin\www_bget?map04144
Ribosome	ko03010	1 out of 129 0.775193798449612%	1620 out of 32833 4.93406024426644%	0.998556	1	BnaA06G0219000ZS	K02950	https:\\www.genome.jp\dbget-bin\www_bget?map03010

## Sheet: Sheet7
#KEGG_pathway	ko_id	Cluster_frequency	Genome_frequency	P-value	Corrected_P-value	GeneID	KEGG Orthology	hyperlink
Phenylpropanoid biosynthesis	ko00940	355 out of 6028 5.88918380889184%	1067 out of 32833 3.24977918557549%	0	0	BnaC08G0449200ZS;BnaA01G0011000ZS;BnaA01G0039500ZS;BnaA05G0365200ZS;BnaA06G0447700ZS;BnaA09G0596400ZS;BnaC01G0012900ZS;BnaC01G0045200ZS;BnaC03G0683600ZS;BnaC03G0684000ZS;BnaC07G0519500ZS;BnaC07G0545000ZS;BnaC09G0091800ZS;BnaC09G0100900ZS;BnaC09G0106000ZS;BnaC09G0294900ZS;BnaC09G0312500ZS;BnaC09G0464400ZS;BnaC09G0511700ZS;BnaC09G0581200ZS;BnaC09G0581300ZS;BnaA01G0045400ZS;BnaA01G0071800ZS;BnaA01G0…	K00083+K00083+K00083+K00083+K00083+K00083+K00083+K00083+K00083+K00083+K00083+K00083+K00430+K00430+K00430+K00430+K00430+K00430+K00430+K00430+K00430+K00430+K00430+K00430+K00430+K00430+K00430+K00430+K00430+K00430+K00430+K00430+K00430+K00430+K00430+K00430+K00430+K00430+K00430+K00430+K00430+K00430+K00430+K00430+K00430+K00430+K00430+K00430+K00430+K00430+K00430+K00430+K00430+K00430+K00430+K00430+K00430+…	https:\\www.genome.jp\dbget-bin\www_bget?map00940
Carbon metabolism	ko01200	349 out of 6028 5.78964830789648%	1326 out of 32833 4.03861968141809%	0	0	BnaC09G0561100ZS;BnaA02G0032600ZS;BnaA10G0248000ZS;BnaC02G0036000ZS;novel.9515;BnaC06G0213200ZS;BnaC09G0024300ZS;BnaA08G0077100ZS;BnaA08G0221800ZS;BnaA09G0039000ZS;BnaC08G0109100ZS;BnaC09G0416100ZS;BnaA02G0111100ZS;BnaA03G0107100ZS;BnaA10G0138800ZS;BnaC02G0136200ZS;BnaC03G0123700ZS;BnaA01G0039900ZS;BnaA03G0358500ZS;BnaA03G0543100ZS;BnaA08G0136800ZS;BnaA08G0260300ZS;BnaC01G0045700ZS;BnaC03G0436800…	K00026+K00026+K00026+K00026+K00026+K00031+K00036+K00036+K00036+K00036+K00036+K00051+K00051+K00051+K00051+K00051+K00051+K00058+K00058+K00058+K00058+K00058+K00058+K00058+K00058+K00058+K00121+K00121+K00121+K00121+K00121+K00121+K00131+K00131+K00131+K00131+K00134+K00134+K00134+K00134+K00134+K00134+K00232+K00261+K00261+K00261+K00261+K00281+K00281+K00382+K00382+K00382+K00600+K00600+K00600+K00600+K00600+…	https:\\www.genome.jp\dbget-bin\www_bget?map01200
Metabolic pathways	ko01100	3080 out of 6028 51.0948905109489%	13753 out of 32833 41.8877349008619%	1.82786e-57	2.52244e-55	BnaC08G0450700ZS;BnaA02G0383900ZS;BnaA09G0597200ZS;BnaC02G0514000ZS;novel.5915;novel.1192;novel.1193;BnaC09G0341100ZS;BnaA10G0089600ZS;BnaC08G0019700ZS;BnaC08G0019800ZS;BnaA07G0285200ZS;BnaC06G0327000ZS;BnaA02G0059400ZS;BnaC06G0160700ZS;BnaA01G0178900ZS;BnaA10G0249100ZS;BnaC02G0035000ZS;BnaC03G0533400ZS;BnaA02G0221800ZS;BnaC09G0561100ZS;BnaA02G0032600ZS;BnaA10G0248000ZS;BnaC02G0036000ZS;novel.951…	K00001+K00001+K00001+K00001+K00002+K00002+K00002+K00008+K00008+K00008+K00008+K00010+K00010+K00012+K00012+K00016+K00020+K00020+K00020+K00021+K00026+K00026+K00026+K00026+K00026+K00031+K00036+K00036+K00036+K00036+K00036+K00051+K00051+K00051+K00051+K00051+K00051+K00053+K00053+K00053+K00053+K00058+K00058+K00058+K00058+K00058+K00058+K00058+K00058+K00058+K00059+K00059+K00059+K00059+K00078+K00078+K00079+…	https:\\www.genome.jp\dbget-bin\www_bget?map01100
Photosynthesis	ko00195	178 out of 6028 2.95288652952887%	312 out of 32833 0.950263454451314%	6.6335e-53	9.15424e-51	BnaA01G0055700ZS;BnaC01G0065300ZS;BnaC09G0310000ZS;BnaA02G0251000ZS;BnaA03G0251900ZS;BnaA09G0261600ZS;BnaC02G0336600ZS;BnaC03G0299300ZS;BnaC09G0277400ZS;BnaA02G0258900ZS;BnaA03G0263200ZS;BnaA09G0236300ZS;BnaC02G0351500ZS;BnaC03G0314400ZS;BnaA01G0064000ZS;BnaC01G0077000ZS;BnaC09G0016600ZS;BnaA03G0266700ZS;BnaA09G0032200ZS;BnaC03G0319100ZS;BnaC08G0259500ZS;BnaA06G0143300ZS;BnaA07G0132900ZS;BnaA07G0…	K02109+K02109+K02113+K02113+K02113+K02113+K02113+K02113+K02115+K02115+K02115+K02115+K02115+K02115+K02634+K02634+K02636+K02636+K02636+K02636+K02638+K02638+K02638+K02638+K02638+K02638+K02638+K02638+K02638+K02639+K02639+K02639+K02639+K02639+K02639+K02639+K02639+K02639+K02639+K02639+K02639+K02639+K02639+K02639+K02639+K02641+K02641+K02641+K02641+K02641+K02641+K02641+K02641+K02641+K02641+K02692+K02692+…	https:\\www.genome.jp\dbget-bin\www_bget?map00195
Photosynthesis - antenna proteins	ko00196	69 out of 6028 1.14465826144658%	81 out of 32833 0.246703012213322%	7.72558e-39	1.06613e-36	BnaC08G0349200ZS;BnaA07G0190300ZS;BnaA09G0507700ZS;BnaC06G0191500ZS;BnaC08G0251300ZS;BnaA04G0010100ZS;BnaA07G0215800ZS;BnaA08G0253100ZS;BnaC04G0266800ZS;BnaC06G0230200ZS;BnaC09G0177400ZS;BnaA01G0279800ZS;BnaA03G0582000ZS;BnaA09G0160400ZS;BnaC01G0342600ZS;BnaC04G0235100ZS;BnaA06G0175800ZS;BnaC03G0618700ZS;BnaA08G0048100ZS;BnaC08G0062900ZS;BnaA03G0165600ZS;BnaA04G0221200ZS;BnaA05G0100700ZS;BnaA05G0…	K08907+K08907+K08907+K08907+K08908+K08908+K08908+K08908+K08908+K08908+K08909+K08909+K08909+K08909+K08909+K08909+K08910+K08910+K08911+K08911+K08912+K08912+K08912+K08912+K08912+K08912+K08912+K08912+K08912+K08912+K08912+K08912+K08912+K08912+K08912+K08912+K08913+K08913+K08913+K08913+K08913+K08913+K08913+K08913+K08914+K08914+K08914+K08915+K08915+K08915+K08915+K08915+K08915+K08915+K08916+K08916+K08916+…	https:\\www.genome.jp\dbget-bin\www_bget?map00196
Porphyrin and chlorophyll metabolism	ko00860	113 out of 6028 1.87458526874585%	217 out of 32833 0.66092041543569%	3.11315e-29	4.29615e-27	BnaA01G0167300ZS;BnaA03G0497900ZS;BnaA08G0167400ZS;BnaA08G0318400ZS;BnaA10G0020200ZS;BnaC01G0215200ZS;BnaC05G0022000ZS;BnaC07G0476300ZS;BnaC08G0006500ZS;BnaA09G0701500ZS;BnaA09G0709600ZS;BnaA10G0018800ZS;BnaC05G0021000ZS;BnaA05G0441000ZS;BnaA10G0010800ZS;BnaC05G0012700ZS;BnaC05G0502900ZS;BnaA04G0258300ZS;BnaC04G0575600ZS;novel.7814;BnaC06G0363000ZS;BnaC08G0421200ZS;BnaA09G0570800ZS;BnaC09G0568300…	K00218+K00218+K00218+K00218+K00218+K00218+K00218+K00218+K00218+K00228+K00228+K00228+K00228+K00231+K00231+K00231+K00231+K01599+K01599+K01599+K01698+K01719+K01719+K01749+K01749+K01749+K01749+K01749+K01749+K01772+K01772+K01845+K01845+K01845+K01845+K01845+K01885+K01885+K02492+K02492+K02492+K02492+K02492+K03403+K03403+K03404+K03404+K03405+K03405+K03405+K03405+K03405+K03405+K03428+K03428+K03428+K03428+…	https:\\www.genome.jp\dbget-bin\www_bget?map00860
Riboflavin metabolism	ko00740	57 out of 6028 0.945587259455873%	120 out of 32833 0.365485944019736%	2.73559e-13	3.77511e-11	BnaA07G0000800ZS;BnaC09G0610600ZS;BnaA10G0291200ZS;BnaC08G0352200ZS;BnaC08G0406900ZS;BnaA01G0076300ZS;BnaA01G0076400ZS;BnaA03G0511800ZS;BnaA05G0015100ZS;BnaA07G0217300ZS;BnaA08G0287300ZS;BnaA09G0510700ZS;BnaC01G0091800ZS;BnaC01G0091900ZS;BnaC03G0778100ZS;BnaC04G0015500ZS;BnaC04G0315600ZS;novel.4159;novel.8160;BnaC03G0725200ZS;BnaC08G0230600ZS;BnaA02G0318800ZS;BnaA05G0381600ZS;BnaA06G0405600ZS;Bna…	K00793+K00953+K00953+K01513+K01513+K01513+K01513+K01513+K01513+K01513+K01513+K01513+K01513+K01513+K01513+K01513+K01513+K01513+K01513+K11752+K14379+K14379+K14379+K14379+K14379+K14379+K14379+K14379+K14379+K14379+K14379+K14379+K14379+K14379+K14652+K14652+K14652+K14652+K14652+K14652+K20860+K20860+K20884+K20884+K20884+K20884+K20884+K20884+K20884+K20884+K20884+K22912+K22912+K22912+K22912+K22949+K22949	https:\\www.genome.jp\dbget-bin\www_bget?map00740
Carotenoid biosynthesis	ko00906	73 out of 6028 1.21101526211015%	170 out of 32833 0.51777175402796%	3.80362e-13	5.249e-11	BnaA05G0480100ZS;BnaC09G0492400ZS;BnaA02G0068500ZS;BnaA03G0073200ZS;BnaA10G0196500ZS;BnaC02G0078700ZS;BnaC03G0083000ZS;BnaA04G0055700ZS;BnaA08G0202200ZS;BnaC03G0667600ZS;BnaC04G0354500ZS;BnaC05G0498900ZS;BnaC05G0562400ZS;novel.2366;BnaC09G0402100ZS;BnaA03G0113600ZS;BnaA10G0128800ZS;BnaC03G0131000ZS;BnaC09G0200400ZS;Bnascaffold0026G0072300ZS;BnaA09G0177600ZS;BnaA09G0675000ZS;BnaA07G0182700ZS;BnaC0…	K00514+K02291+K02291+K02291+K02291+K02291+K02291+K02293+K02293+K02293+K02293+K06443+K06443+K06443+K06444+K06444+K06444+K06444+K09835+K09835+K09835+K09835+K09837+K09837+K09838+K09838+K09838+K09838+K09838+K09838+K09838+K09838+K09839+K09839+K09839+K09839+K09840+K09840+K09840+K09841+K09841+K09841+K09841+K09841+K09843+K09843+K09843+K09843+K09843+K09843+K14595+K14595+K14595+K14595+K14595+K15744+K15744+…	https:\\www.genome.jp\dbget-bin\www_bget?map00906
Carbon fixation in photosynthetic organisms	ko00710	156 out of 6028 2.58792302587923%	380 out of 32833 1.1573721560625%	2.87248e-12	3.96402e-10	BnaC09G0561100ZS;BnaA02G0032600ZS;BnaA10G0248000ZS;BnaC02G0036000ZS;novel.9515;BnaC09G0416100ZS;BnaA02G0111100ZS;BnaA03G0107100ZS;BnaA10G0138800ZS;BnaC02G0136200ZS;BnaC03G0123700ZS;BnaA02G0238000ZS;BnaA07G0230600ZS;BnaA09G0640500ZS;BnaC02G0319900ZS;BnaC05G0135800ZS;BnaC06G0249000ZS;BnaC08G0398700ZS;BnaA04G0013900ZS;BnaA05G0051500ZS;BnaA09G0552000ZS;BnaC04G0057500ZS;BnaC04G0274300ZS;BnaC06G0290200…	K00026+K00026+K00026+K00026+K00026+K00051+K00051+K00051+K00051+K00051+K00051+K00134+K00134+K00134+K00134+K00134+K00134+K00615+K00615+K00615+K00615+K00615+K00615+K00814+K00814+K00855+K00855+K00855+K00855+K00855+K00855+K00927+K00927+K00927+K00927+K00927+K00927+K00927+K00927+K00927+K00927+K00927+K00927+K01006+K01006+K01006+K01006+K01100+K01100+K01100+K01100+K01100+K01100+K01595+K01595+K01595+K01595+…	https:\\www.genome.jp\dbget-bin\www_bget?map00710
Glyoxylate and dicarboxylate metabolism	ko00630	155 out of 6028 2.57133377571334%	449 out of 32833 1.36752657387385%	5.47051e-12	7.54931e-10	BnaC09G0561100ZS;BnaA02G0032600ZS;BnaA10G0248000ZS;BnaC02G0036000ZS;novel.9515;BnaA01G0048600ZS;BnaC01G0055600ZS;BnaC09G0604900ZS;BnaA03G0201500ZS;BnaA10G0286200ZS;BnaC03G0238000ZS;BnaC04G0580500ZS;BnaA06G0043400ZS;BnaC03G0419600ZS;BnaC06G0024800ZS;BnaA01G0011100ZS;BnaA07G0325000ZS;BnaA08G0052000ZS;BnaA08G0189700ZS;BnaC01G0013200ZS;BnaC01G0062600ZS;BnaC03G0684400ZS;BnaC08G0068200ZS;BnaC08G0212500…	K00026+K00026+K00026+K00026+K00026+K00281+K00281+K00284+K00284+K00284+K00284+K00284+K00382+K00382+K00382+K00600+K00600+K00600+K00600+K00600+K00600+K00600+K00600+K00605+K00605+K00605+K00605+K00605+K00830+K00830+K00830+K00830+K01433+K01433+K01433+K01455+K01455+K01455+K01455+K01601+K01601+K01602+K01602+K01602+K01602+K01602+K01602+K01602+K01602+K01602+K01602+K01602+K01602+K01647+K01647+K01895+K01913+…	https:\\www.genome.jp\dbget-bin\www_bget?map00630
Starch and sucrose metabolism	ko00500	343 out of 6028 5.69011280690113%	1342 out of 32833 4.08735114062072%	1.05738e-11	1.45918e-09	BnaA06G0371600ZS;BnaC02G0476500ZS;BnaC03G0614900ZS;BnaC08G0280700ZS;BnaC09G0008900ZS;BnaC09G0079300ZS;BnaC09G0159900ZS;BnaA03G0090400ZS;BnaA05G0483600ZS;BnaA07G0335800ZS;BnaA10G0171200ZS;BnaC02G0270600ZS;BnaC03G0102700ZS;BnaC03G0668000ZS;BnaC04G0332800ZS;BnaC04G0416700ZS;BnaC06G0283800ZS;BnaC07G0249200ZS;novel.4203;novel.5595;novel.5596;novel.5801;novel.1304;novel.710;novel.8836;novel.9101;novel.…	K00688+K00688+K00688+K00695+K00695+K00695+K00695+K00695+K00695+K00695+K00695+K00695+K00695+K00695+K00695+K00695+K00695+K00695+K00695+K00695+K00695+K00695+K00695+K00695+K00695+K00695+K00695+K00695+K00695+K00696+K00696+K00696+K00696+K00696+K00696+K00696+K00696+K00700+K00700+K00700+K00703+K00703+K00703+K00703+K00703+K00703+K00706+K00706+K00706+K00750+K00844+K00844+K00844+K00847+K00847+K00847+K00847+…	https:\\www.genome.jp\dbget-bin\www_bget?map00500
Nitrogen metabolism	ko00910	71 out of 6028 1.17783676177837%	181 out of 32833 0.551274632229769%	3.93214e-11	5.42636e-09	BnaA01G0405900ZS;BnaA10G0190000ZS;BnaC01G0508900ZS;BnaC02G0027900ZS;BnaC03G0150600ZS;BnaC09G0604900ZS;BnaA03G0201500ZS;BnaA10G0286200ZS;BnaC03G0238000ZS;BnaC04G0580500ZS;BnaC09G0108500ZS;BnaA03G0141900ZS;BnaA09G0107500ZS;BnaC03G0164800ZS;novel.5339;BnaA01G0013400ZS;BnaA01G0013500ZS;BnaC01G0015800ZS;BnaC01G0015900ZS;BnaA02G0068000ZS;BnaA04G0200300ZS;BnaC02G0078200ZS;BnaC04G0505800ZS;Bnascaffold002…	K00261+K00261+K00261+K00261+K00264+K00284+K00284+K00284+K00284+K00284+K00366+K00366+K00366+K00366+K00366+K01455+K01455+K01455+K01455+K01501+K01501+K01501+K01501+K01673+K01673+K01673+K01673+K01673+K01673+K01673+K01673+K01673+K01673+K01673+K01673+K01673+K01673+K01673+K01674+K01674+K01674+K01674+K01725+K01915+K01915+K01915+K01915+K01915+K01915+K01915+K01915+K01915+K01915+K01915+K01915+K01915+K01915+…	https:\\www.genome.jp\dbget-bin\www_bget?map00910
Biosynthesis of secondary metabolites	ko01110	1913 out of 6028 31.7352355673524%	7179 out of 32833 21.8651966009807%	4.38739e-11	6.0546e-09	BnaC08G0450700ZS;BnaA02G0383900ZS;BnaA09G0597200ZS;BnaC02G0514000ZS;novel.5915;novel.1192;novel.1193;BnaA03G0203200ZS;BnaA04G0259700ZS;BnaA05G0025400ZS;BnaC03G0240100ZS;BnaC04G0027000ZS;BnaC04G0576800ZS;BnaA07G0285200ZS;BnaC06G0327000ZS;BnaA01G0178900ZS;BnaA02G0221800ZS;BnaC09G0561100ZS;BnaA02G0032600ZS;BnaA10G0248000ZS;BnaC02G0036000ZS;novel.9515;BnaC06G0213200ZS;BnaC09G0024300ZS;BnaA08G0077100Z…	K00001+K00001+K00001+K00001+K00002+K00002+K00002+K00006+K00006+K00006+K00006+K00006+K00006+K00010+K00010+K00016+K00021+K00026+K00026+K00026+K00026+K00026+K00031+K00036+K00036+K00036+K00036+K00036+K00053+K00053+K00053+K00053+K00058+K00058+K00058+K00058+K00058+K00058+K00058+K00058+K00058+K00059+K00059+K00059+K00059+K00083+K00083+K00083+K00083+K00083+K00083+K00083+K00083+K00083+K00083+K00083+K00083+…	https:\\www.genome.jp\dbget-bin\www_bget?map01110
Plant-pathogen interaction	ko04626	632 out of 6028 10.4844061048441%	2759 out of 32833 8.40313099625377%	1.4112e-10	1.94746e-08	BnaC06G0243900ZS;BnaA01G0189800ZS;BnaA03G0050100ZS;BnaA06G0256000ZS;BnaA06G0298200ZS;BnaC03G0058000ZS;BnaC06G0161900ZS;Bnascaffold0026G0068100ZS;BnaA01G0109200ZS;BnaA03G0457600ZS;BnaA06G0434400ZS;BnaA07G0051600ZS;BnaC01G0132800ZS;BnaC03G0718900ZS;BnaC07G0232700ZS;BnaC07G0433400ZS;novel.1974;novel.2439;BnaC09G0274900ZS;BnaC02G0160100ZS;BnaA03G0115500ZS;BnaC03G0133700ZS;BnaC08G0235800ZS;BnaC08G0253…	K00864+K01373+K02183+K02183+K02183+K02183+K02183+K02358+K02358+K02358+K02358+K02358+K02358+K02358+K02358+K02358+K02358+K02358+K04079+K04079+K04368+K04368+K05391+K05391+K05391+K05391+K05391+K05391+K05391+K05391+K05391+K05391+K05391+K05391+K05391+K05391+K05391+K05391+K05391+K05391+K05391+K05391+K05391+K05391+K05391+K05391+K05391+K05391+K05391+K05391+K05391+K05391+K05391+K05391+K05391+K05391+K05391+…	https:\\www.genome.jp\dbget-bin\www_bget?map04626
Cyanoamino acid metabolism	ko00460	107 out of 6028 1.7750497677505%	331 out of 32833 1.00813206225444%	6.43713e-10	8.88324e-08	BnaA01G0011100ZS;BnaA07G0325000ZS;BnaA08G0052000ZS;BnaA08G0189700ZS;BnaC01G0013200ZS;BnaC01G0062600ZS;BnaC03G0684400ZS;BnaC08G0068200ZS;BnaC08G0393400ZS;BnaC08G0393500ZS;BnaC08G0393600ZS;BnaC09G0579200ZS;BnaC09G0579300ZS;Bnascaffold0027G0010300ZS;Bnascaffold2543G0000100ZS;BnaA01G0367800ZS;BnaA03G0105400ZS;BnaA03G0105500ZS;BnaA03G0228700ZS;BnaA04G0005700ZS;BnaA04G0018000ZS;BnaA04G0018200ZS;BnaA04G…	K00600+K00600+K00600+K00600+K00600+K00600+K00600+K00600+K01188+K01188+K01188+K01188+K01188+K01188+K01188+K01188+K01188+K01188+K01188+K01188+K01188+K01188+K01188+K01188+K01188+K01188+K01188+K01188+K01188+K01188+K01188+K01188+K01188+K01188+K01188+K01188+K01188+K01188+K01188+K01188+K01188+K01188+K01188+K01188+K01188+K01188+K01188+K01188+K01188+K01188+K01188+K01188+K01188+K01188+K01188+K01455+K01455+…	https:\\www.genome.jp\dbget-bin\www_bget?map00460
Ubiquinone and other terpenoid-quinone biosynthesis	ko00130	78 out of 6028 1.29396151293962%	224 out of 32833 0.682240428836841%	3.25505e-09	4.49197e-07	BnaA09G0676100ZS;BnaA10G0046800ZS;BnaC05G0047700ZS;BnaA03G0147400ZS;BnaA04G0196800ZS;BnaA05G0132000ZS;BnaC03G0171900ZS;BnaC04G0500500ZS;BnaC08G0458300ZS;BnaA03G0238000ZS;BnaA03G0473600ZS;BnaA05G0144400ZS;BnaA09G0578100ZS;BnaA09G0604200ZS;BnaC02G0171200ZS;BnaC06G0151600ZS;BnaC07G0451900ZS;novel.1470;novel.8853;BnaC09G0186400ZS;BnaA09G0166800ZS;BnaC09G0137200ZS;BnaC09G0271300ZS;BnaC09G0271500ZS;Bna…	K00457+K00457+K00457+K00487+K00487+K00487+K00487+K00487+K00815+K00815+K00815+K00815+K00815+K00815+K00815+K00815+K00815+K00815+K00815+K01661+K01661+K01904+K01904+K01904+K01904+K01904+K01904+K01904+K01904+K01904+K01904+K01904+K01904+K01904+K01904+K01904+K01904+K01904+K01904+K02552+K02552+K02552+K02552+K02552+K02552+K03809+K03809+K03809+K03809+K05928+K05928+K05928+K05928+K09833+K09833+K09834+K09834+…	https:\\www.genome.jp\dbget-bin\www_bget?map00130
Glycerolipid metabolism	ko00561	164 out of 6028 2.72063702720637%	588 out of 32833 1.79088112569671%	7.37288e-09	1.01746e-06	novel.5915;novel.1192;novel.1193;BnaC08G0284400ZS;BnaA01G0039400ZS;BnaA03G0554200ZS;BnaA05G0389400ZS;BnaA06G0170700ZS;BnaA08G0182200ZS;BnaA08G0235200ZS;BnaC01G0027700ZS;BnaC01G0045100ZS;BnaC03G0694900ZS;BnaC05G0208700ZS;BnaC07G0530700ZS;BnaA05G0326300ZS;BnaA08G0075600ZS;BnaC05G0343500ZS;BnaC08G0107200ZS;BnaC08G0208800ZS;BnaA03G0520300ZS;BnaA04G0215000ZS;BnaA05G0108000ZS;BnaA06G0073900ZS;BnaA06G04…	K00002+K00002+K00002+K00128+K00128+K00128+K00128+K00128+K00128+K00128+K00128+K00128+K00128+K00128+K00128+K00630+K00630+K00630+K00630+K00655+K00655+K00655+K00655+K00655+K00655+K00655+K00655+K00655+K00655+K00655+K00655+K00679+K00679+K00679+K00679+K00679+K00679+K00679+K00679+K00679+K00679+K00679+K00679+K00679+K00679+K00679+K00679+K00679+K00679+K00679+K00679+K00679+K00679+K00679+K00679+K00679+K00679+…	https:\\www.genome.jp\dbget-bin\www_bget?map00561
Fructose and mannose metabolism	ko00051	115 out of 6028 1.90776376907764%	387 out of 32833 1.17869216946365%	3.33342e-08	4.60013e-06	BnaC09G0341100ZS;BnaA10G0089600ZS;BnaC08G0019700ZS;BnaC08G0019800ZS;BnaA10G0056100ZS;BnaC06G0022700ZS;novel.9541;BnaC08G0341300ZS;BnaA02G0162800ZS;BnaA03G0151300ZS;BnaA04G0021200ZS;BnaA04G0205700ZS;BnaA05G0126000ZS;BnaA07G0307500ZS;BnaA09G0500800ZS;BnaA10G0088800ZS;BnaC03G0177100ZS;BnaC03G0420000ZS;BnaC04G0286400ZS;BnaC04G0512300ZS;BnaC06G0219200ZS;BnaC06G0356900ZS;BnaA01G0050200ZS;BnaA01G0079500…	K00008+K00008+K00008+K00008+K00844+K00844+K00844+K00847+K00847+K00847+K00847+K00847+K00847+K00847+K00847+K00847+K00847+K00847+K00847+K00847+K00847+K00847+K00850+K00850+K00850+K00850+K00850+K00850+K00850+K00850+K00850+K00850+K00850+K00850+K00850+K00850+K00850+K00850+K00850+K00850+K00850+K00850+K00850+K00850+K00850+K00850+K00863+K00895+K00895+K00895+K00895+K00895+K00895+K00895+K00966+K00966+K00966+…	https:\\www.genome.jp\dbget-bin\www_bget?map00051
MAPK signaling pathway - plant	ko04016	429 out of 6028 7.11678832116788%	1847 out of 32833 5.62543782170377%	3.75501e-08	5.18192e-06	BnaA06G0285000ZS;BnaA09G0083500ZS;BnaC03G0544700ZS;BnaA03G0050100ZS;BnaA06G0256000ZS;BnaA06G0298200ZS;BnaC03G0058000ZS;BnaC06G0161900ZS;BnaC08G0260800ZS;Bnascaffold0025G0038400ZS;BnaA01G0032600ZS;BnaA02G0147200ZS;BnaA03G0547900ZS;BnaA06G0144600ZS;BnaA07G0132000ZS;BnaA08G0131200ZS;BnaA08G0247000ZS;BnaC02G0188700ZS;BnaC03G0740800ZS;BnaC07G0524400ZS;BnaC09G0039500ZS;BnaC09G0418000ZS;Bnascaffold0026G…	K00940+K00940+K00940+K02183+K02183+K02183+K02183+K02183+K03781+K03781+K03781+K03781+K03781+K03781+K03781+K03781+K03781+K03781+K03781+K03781+K13413+K13413+K13413+K13413+K13413+K13413+K13413+K13413+K13413+K13413+K13413+K13413+K13413+K13413+K13413+K13413+K13413+K13413+K13413+K13413+K13413+K13413+K13413+K13413+K13413+K13413+K13413+K13413+K13413+K13413+K13413+K13413+K13413+K13413+K13413+K13413+K13413+…	https:\\www.genome.jp\dbget-bin\www_bget?map04016
Flavonoid biosynthesis	ko00941	77 out of 6028 1.27737226277372%	233 out of 32833 0.709651874638321%	5.34444e-08	7.37533e-06	BnaC08G0314600ZS;BnaA09G0476900ZS;BnaA03G0147400ZS;BnaA04G0196800ZS;BnaA05G0132000ZS;BnaC03G0171900ZS;BnaC04G0500500ZS;BnaA02G0170100ZS;BnaA03G0541500ZS;BnaA08G0089300ZS;BnaC02G0218400ZS;BnaC07G0517700ZS;BnaC08G0127300ZS;BnaC08G0127400ZS;novel.4083;novel.5122;novel.5805;novel.10077;novel.1084;BnaC09G0593800ZS;BnaA01G0107500ZS;BnaA05G0070600ZS;BnaA06G0011300ZS;BnaA10G0276200ZS;BnaC01G0131000ZS;Bna…	K00475+K00475+K00487+K00487+K00487+K00487+K00487+K00588+K00588+K00588+K00588+K00588+K00588+K00588+K00660+K00660+K00660+K00660+K00660+K01859+K01859+K01859+K01859+K01859+K01859+K01859+K05277+K05278+K05278+K05278+K05278+K05278+K05278+K05278+K05278+K05278+K05278+K05278+K05278+K05278+K05278+K05280+K05280+K08243+K08243+K08243+K09754+K09754+K09754+K13065+K13065+K13065+K13065+K13065+K13065+K13065+K13065+…	https:\\www.genome.jp\dbget-bin\www_bget?map00941
Pentose phosphate pathway	ko00030	98 out of 6028 1.62574651625747%	326 out of 32833 0.992903481253617%	1.82018e-07	2.51184e-05	BnaC09G0024300ZS;BnaA08G0077100ZS;BnaA08G0221800ZS;BnaA09G0039000ZS;BnaC08G0109100ZS;BnaC08G0433500ZS;BnaA04G0160500ZS;BnaA09G0581000ZS;BnaC04G0455800ZS;BnaC08G0398700ZS;BnaA04G0013900ZS;BnaA05G0051500ZS;BnaA09G0552000ZS;BnaC04G0057500ZS;BnaC04G0274300ZS;BnaC09G0526900ZS;BnaA02G0048000ZS;BnaA10G0222100ZS;BnaC02G0055400ZS;BnaA01G0050200ZS;BnaA01G0079500ZS;BnaA01G0157600ZS;BnaA03G0115300ZS;BnaA03G0…	K00036+K00036+K00036+K00036+K00036+K00131+K00131+K00131+K00131+K00615+K00615+K00615+K00615+K00615+K00615+K00616+K00616+K00616+K00616+K00850+K00850+K00850+K00850+K00850+K00850+K00850+K00850+K00850+K00850+K00850+K00850+K00850+K00850+K00850+K00850+K00850+K00850+K00850+K00850+K00850+K00850+K00850+K00850+K00895+K00895+K00895+K00895+K00895+K00895+K00895+K00948+K01057+K01057+K01057+K01057+K01057+K01623+…	https:\\www.genome.jp\dbget-bin\www_bget?map00030
Glycine, serine and threonine metabolism	ko00260	124 out of 6028 2.05706702057067%	450 out of 32833 1.37057229007401%	9.40896e-07	0.000129844	BnaA01G0039900ZS;BnaA03G0358500ZS;BnaA03G0543100ZS;BnaA08G0136800ZS;BnaA08G0260300ZS;BnaC01G0045700ZS;BnaC03G0436800ZS;BnaC03G0747700ZS;BnaC07G0519100ZS;BnaC08G0217900ZS;BnaC08G0359400ZS;BnaC08G0359500ZS;BnaC08G0359600ZS;BnaA09G0516900ZS;BnaA09G0517000ZS;BnaA09G0517100ZS;BnaC03G0573400ZS;BnaC06G0131700ZS;BnaA06G0098000ZS;BnaA01G0200500ZS;BnaA02G0263300ZS;BnaA02G0263500ZS;BnaA04G0296800ZS;BnaA08G0…	K00058+K00058+K00058+K00058+K00058+K00058+K00058+K00058+K00058+K00108+K00108+K00108+K00108+K00108+K00108+K00108+K00130+K00130+K00133+K00276+K00276+K00276+K00276+K00276+K00276+K00276+K00276+K00276+K00276+K00281+K00281+K00306+K00382+K00382+K00382+K00499+K00499+K00600+K00600+K00600+K00600+K00600+K00600+K00600+K00600+K00605+K00605+K00605+K00605+K00605+K00827+K00827+K00827+K00827+K00827+K00827+K00830+…	https:\\www.genome.jp\dbget-bin\www_bget?map00260
Cutin, suberine and wax biosynthesis	ko00073	86 out of 6028 1.42667551426676%	288 out of 32833 0.877166265647367%	1.34376e-06	0.000185438	BnaA01G0042600ZS;BnaA03G0095100ZS;BnaA04G0034500ZS;BnaA06G0188700ZS;BnaA06G0257000ZS;BnaA08G0139800ZS;BnaA10G0163900ZS;BnaC01G0048500ZS;BnaC02G0110800ZS;BnaC03G0107600ZS;BnaC03G0579500ZS;BnaC03G0597600ZS;BnaC03G0752500ZS;BnaC04G0306000ZS;BnaA10G0004100ZS;BnaC02G0332800ZS;BnaC05G0006000ZS;BnaC08G0291200ZS;BnaA01G0141100ZS;BnaA03G0197500ZS;BnaA03G0529500ZS;BnaA04G0122700ZS;BnaA04G0251000ZS;BnaA06G0…	K13356+K13356+K13356+K13356+K13356+K13356+K13356+K13356+K13356+K13356+K13356+K13356+K13356+K13356+K15398+K15398+K15398+K15400+K15400+K15400+K15400+K15400+K15400+K15400+K15400+K15400+K15400+K15400+K15400+K15400+K15400+K15400+K15400+K15400+K15400+K15400+K15400+K15400+K15400+K15401+K15401+K15401+K15401+K15402+K15402+K15402+K15402+K15404+K15404+K15404+K15404+K15404+K15404+K15404+K15404+K15404+K15404+…	https:\\www.genome.jp\dbget-bin\www_bget?map00073
Vitamin B6 metabolism	ko00750	27 out of 6028 0.447909754479098%	61 out of 32833 0.185788688210033%	2.82934e-06	0.000390449	BnaA03G0021200ZS;BnaC03G0025700ZS;novel.9938;BnaC09G0115400ZS;BnaA09G0112900ZS;BnaC09G0126400ZS;BnaA02G0203200ZS;BnaA09G0120900ZS;BnaC02G0270100ZS;BnaC09G0357600ZS;BnaA08G0306200ZS;BnaA10G0100500ZS;BnaC08G0024900ZS;BnaA01G0344100ZS;BnaA03G0003200ZS;BnaA04G0245700ZS;BnaC03G0005300ZS;BnaC04G0560700ZS;BnaC09G0440300ZS;BnaA02G0098100ZS;BnaA02G0098300ZS;BnaA10G0157500ZS;BnaC02G0118000ZS;BnaA02G0204200…	K00275+K00275+K00275+K00831+K00831+K01733+K01733+K01733+K01733+K05275+K05275+K05275+K05275+K06215+K06215+K06215+K06215+K06215+K08681+K08681+K08681+K08681+K08681+K13248+K13248+K13248+K13248	https:\\www.genome.jp\dbget-bin\www_bget?map00750
Glycolysis / Gluconeogenesis	ko00010	181 out of 6028 3.00265428002654%	732 out of 32833 2.22946425852039%	8.76799e-06	0.00120998	BnaC08G0450700ZS;BnaA02G0383900ZS;BnaA09G0597200ZS;BnaC02G0514000ZS;novel.5915;novel.1192;novel.1193;BnaA01G0178900ZS;BnaA06G0430300ZS;BnaA07G0122900ZS;BnaA08G0239100ZS;BnaA09G0461800ZS;BnaC07G0180700ZS;BnaC07G0240500ZS;BnaC08G0284400ZS;BnaA01G0039400ZS;BnaA03G0554200ZS;BnaA05G0389400ZS;BnaA06G0170700ZS;BnaA08G0182200ZS;BnaA08G0235200ZS;BnaC01G0027700ZS;BnaC01G0045100ZS;BnaC03G0694900ZS;BnaC05G02…	K00001+K00001+K00001+K00001+K00002+K00002+K00002+K00016+K00121+K00121+K00121+K00121+K00121+K00121+K00128+K00128+K00128+K00128+K00128+K00128+K00128+K00128+K00128+K00128+K00128+K00128+K00131+K00131+K00131+K00131+K00134+K00134+K00134+K00134+K00134+K00134+K00382+K00382+K00382+K00844+K00844+K00844+K00850+K00850+K00850+K00850+K00850+K00850+K00850+K00850+K00850+K00850+K00850+K00850+K00850+K00850+K00850+…	https:\\www.genome.jp\dbget-bin\www_bget?map00010
Stilbenoid, diarylheptanoid and gingerol biosynthesis	ko00945	40 out of 6028 0.6635700066357%	113 out of 32833 0.344165930618585%	1.28703e-05	0.0017761	BnaA03G0147400ZS;BnaA04G0196800ZS;BnaA05G0132000ZS;BnaC03G0171900ZS;BnaC04G0500500ZS;BnaA02G0170100ZS;BnaA03G0541500ZS;BnaA08G0089300ZS;BnaC02G0218400ZS;BnaC07G0517700ZS;BnaC08G0127300ZS;BnaC08G0127400ZS;BnaA04G0261600ZS;BnaC04G0578600ZS;novel.8218;BnaC09G0614200ZS;BnaA01G0197600ZS;BnaA02G0009800ZS;BnaA02G0056700ZS;BnaA02G0276300ZS;BnaA02G0369900ZS;BnaA03G0426600ZS;BnaA04G0073500ZS;BnaA04G0150900…	K00487+K00487+K00487+K00487+K00487+K00588+K00588+K00588+K00588+K00588+K00588+K00588+K09754+K09754+K09754+K13065+K13065+K13065+K13065+K13065+K13065+K13065+K13065+K13065+K13065+K13065+K13065+K13065+K13065+K13065+K13065+K13065+K13065+K13065+K13065+K13065+K13065+K13065+K13065+K13065	https:\\www.genome.jp\dbget-bin\www_bget?map00945
Plant hormone signal transduction	ko04075	489 out of 6028 8.11214333112143%	2271 out of 32833 6.91682149057351%	3.93463e-05	0.00542979	BnaA03G0226200ZS;BnaA03G0407400ZS;BnaA05G0010000ZS;BnaA07G0218800ZS;BnaA09G0026700ZS;BnaA09G0661900ZS;BnaA10G0010700ZS;BnaC03G0324600ZS;BnaC04G0010300ZS;BnaC07G0207700ZS;BnaC07G0380100ZS;BnaC09G0039500ZS;BnaC09G0418000ZS;Bnascaffold0026G0050200ZS;BnaA01G0096200ZS;BnaA01G0292900ZS;BnaA02G0110000ZS;BnaA02G0233400ZS;BnaA02G0295500ZS;BnaA03G0207300ZS;BnaA03G0366400ZS;BnaA03G0449400ZS;BnaA04G0202700ZS…	K12126+K12126+K12126+K12126+K12126+K12126+K12126+K12126+K12126+K12126+K12126+K13413+K13413+K13413+K13413+K13413+K13413+K13413+K13413+K13413+K13413+K13413+K13413+K13413+K13413+K13413+K13413+K13413+K13413+K13413+K13413+K13413+K13413+K13413+K13413+K13413+K13413+K13413+K13413+K13413+K13413+K13413+K13413+K13413+K13413+K13413+K13413+K13413+K13413+K13413+K13413+K13413+K13415+K13415+K13415+K13415+K13415+…	https:\\www.genome.jp\dbget-bin\www_bget?map04075
Monoterpenoid biosynthesis	ko00902	12 out of 6028 0.19907100199071%	20 out of 32833 0.0609143240032894%	4.18602e-05	0.0057767	BnaC08G0434400ZS;BnaA03G0240000ZS;BnaC03G0283300ZS;BnaC03G0304500ZS;BnaA09G0159800ZS;BnaA09G0159900ZS;BnaA09G0160000ZS;BnaC08G0401600ZS;BnaA04G0011500ZS;BnaA09G0554800ZS;BnaC04G0270300ZS;BnaC05G0004100ZS	K07385+K12467+K12467+K12467+K15086+K15086+K15086+K15095+K15095+K15095+K15095+K15095	https:\\www.genome.jp\dbget-bin\www_bget?map00902
Thiamine metabolism	ko00730	30 out of 6028 0.497677504976775%	81 out of 32833 0.246703012213322%	5.70134e-05	0.00786784	BnaC09G0032200ZS;BnaA08G0078800ZS;BnaA09G0046500ZS;BnaA10G0063100ZS;BnaA10G0180200ZS;BnaC06G0013100ZS;BnaC07G0325000ZS;BnaC08G0111500ZS;BnaA08G0321000ZS;BnaA03G0368100ZS;BnaA03G0428100ZS;BnaC01G0246000ZS;BnaC07G0401700ZS;BnaC09G0372400ZS;BnaA02G0131600ZS;BnaA03G0124100ZS;BnaA10G0109700ZS;BnaC02G0164500ZS;BnaC03G0143700ZS;BnaA05G0139000ZS;BnaC04G0183400ZS;BnaC01G0467800ZS;BnaC08G0216700ZS;BnaC08G0…	K00939+K00939+K00939+K00939+K00939+K00939+K00939+K00939+K00949+K01662+K01662+K01662+K01662+K03146+K03146+K03146+K03146+K03146+K03146+K03147+K03147+K20896+K22911+K22911+K22911+K22911+K22911+K22911+K22911+K22911	https:\\www.genome.jp\dbget-bin\www_bget?map00730
Tryptophan metabolism	ko00380	120 out of 6028 1.9907100199071%	476 out of 32833 1.44976091127829%	0.000113434	0.0156539	BnaC08G0284400ZS;BnaA01G0039400ZS;BnaA03G0554200ZS;BnaA05G0389400ZS;BnaA06G0170700ZS;BnaA08G0182200ZS;BnaA08G0235200ZS;BnaC01G0027700ZS;BnaC01G0045100ZS;BnaC03G0694900ZS;BnaC05G0208700ZS;BnaC07G0530700ZS;BnaA06G0043400ZS;BnaC03G0419600ZS;BnaC06G0024800ZS;BnaA07G0389000ZS;BnaC06G0457800ZS;BnaA05G0175500ZS;BnaC05G0295800ZS;novel.4052;novel.5700;novel.6028;novel.1260;novel.8233;novel.9065;novel.994;…	K00128+K00128+K00128+K00128+K00128+K00128+K00128+K00128+K00128+K00128+K00128+K00128+K00382+K00382+K00382+K00837+K00837+K01237+K01237+K01237+K01237+K01237+K01237+K01237+K01237+K01237+K01237+K01237+K01237+K01237+K01426+K01426+K01426+K01501+K01501+K01501+K01501+K01593+K03781+K03781+K03781+K03781+K03781+K03781+K03781+K03781+K03781+K03781+K03781+K03781+K11812+K11812+K11813+K11816+K11816+K11816+K11816+…	https:\\www.genome.jp\dbget-bin\www_bget?map00380
Zeatin biosynthesis	ko00908	47 out of 6028 0.779694757796948%	154 out of 32833 0.469040294825328%	0.000173509	0.0239442	BnaC08G0420600ZS;BnaA02G0088800ZS;BnaA03G0203000ZS;BnaC02G0107100ZS;BnaC03G0239900ZS;BnaC02G0099100ZS;BnaC03G0098500ZS;BnaA02G0164000ZS;BnaC02G0210000ZS;BnaC04G0380600ZS;BnaC09G0474600ZS;BnaA02G0076800ZS;BnaA10G0183600ZS;BnaC02G0090600ZS;BnaC06G0312200ZS;BnaC07G0117300ZS;BnaC09G0588900ZS;BnaC09G0589000ZS;BnaC09G0589100ZS;BnaC09G0589400ZS;BnaA05G0434700ZS;BnaA07G0192900ZS;BnaA10G0272300ZS;BnaC03G0…	K00279+K00279+K00279+K00279+K00279+K00791+K00791+K10717+K10717+K10717+K10760+K10760+K10760+K10760+K10760+K10760+K13493+K13493+K13493+K13493+K13493+K13493+K13493+K13493+K13493+K13493+K13493+K13493+K13496+K13496+K13496+K13496+K13496+K13496+K13496+K13496+K13496+K13496+K13496+K23452+K23452+K23452+K23452+K23452+K23452+K23452+K23452	https:\\www.genome.jp\dbget-bin\www_bget?map00908
Glycosaminoglycan degradation	ko00531	51 out of 6028 0.846051758460518%	172 out of 32833 0.523863186428289%	0.000209285	0.0288813	BnaA02G0050000ZS;BnaA03G0407200ZS;BnaA08G0079300ZS;BnaC08G0112100ZS;BnaA02G0373000ZS;BnaA06G0367100ZS;BnaA08G0095500ZS;BnaC02G0499200ZS;BnaC08G0137100ZS;BnaC08G0376700ZS;BnaC09G0444500ZS;BnaA01G0023300ZS;BnaA01G0233800ZS;BnaA01G0357700ZS;BnaA02G0095900ZS;BnaA02G0121300ZS;BnaA02G0320500ZS;BnaA03G0114000ZS;BnaA05G0413000ZS;BnaA06G0049200ZS;BnaA06G0289000ZS;BnaA06G0404200ZS;BnaA06G0404500ZS;BnaA07G0…	K01205+K07964+K07964+K07964+K10532+K10532+K10532+K10532+K10532+K12309+K12309+K12309+K12309+K12309+K12309+K12309+K12309+K12309+K12309+K12309+K12309+K12309+K12309+K12309+K12309+K12309+K12309+K12309+K12309+K12309+K12309+K12309+K12309+K12309+K12309+K12309+K12309+K12309+K12309+K12309+K12309+K12309+K12309+K12309+K12309+K12309+K12309+K12309+K12309+K12373+K12373	https:\\www.genome.jp\dbget-bin\www_bget?map00531
Glucosinolate biosynthesis	ko00966	39 out of 6028 0.646980756469808%	123 out of 32833 0.37462309262023%	0.000251201	0.0346657	BnaC08G0199000ZS;BnaC08G0298700ZS;BnaA06G0063200ZS;BnaA08G0290800ZS;BnaC05G0078800ZS;BnaA08G0192100ZS;BnaC07G0541500ZS;BnaC04G0436200ZS;BnaA09G0123400ZS;BnaC05G0210800ZS;BnaA06G0110600ZS;BnaC05G0136700ZS;BnaA04G0074700ZS;BnaA04G0267400ZS;BnaC04G0359300ZS;BnaC04G0584500ZS;BnaA02G0257100ZS;BnaC02G0347600ZS;novel.5717;novel.1407;novel.8786;novel.1014;BnaA03G0359600ZS;BnaA05G0362200ZS;BnaC03G0438900Z…	K00826+K00826+K00826+K00826+K00826+K11812+K11812+K11813+K11819+K11820+K12154+K12154+K12156+K12156+K12156+K12156+K15741+K15741+K15741+K15741+K15741+K15741+K21346+K21346+K21346+K21346+K21359+K21359+K21360+K21360+K22321+K22321+K22321+K22321+K22321+K22321+K22321+K22321+K22321	https:\\www.genome.jp\dbget-bin\www_bget?map00966
Glutathione metabolism	ko00480	118 out of 6028 1.95753151957532%	479 out of 32833 1.45889805987878%	0.000343103	0.0473483	BnaC06G0213200ZS;BnaC09G0024300ZS;BnaA08G0077100ZS;BnaA08G0221800ZS;BnaA09G0039000ZS;BnaC08G0109100ZS;BnaC08G0346500ZS;BnaC08G0428600ZS;BnaA03G0529000ZS;BnaA07G0222500ZS;BnaA09G0577200ZS;BnaC04G0156100ZS;BnaC04G0257400ZS;BnaC06G0239400ZS;BnaC07G0506700ZS;BnaA03G0249400ZS;BnaA03G0399300ZS;BnaA03G0531500ZS;BnaA03G0547400ZS;BnaA07G0368900ZS;BnaC03G0295500ZS;BnaC03G0497700ZS;BnaC06G0433300ZS;BnaC07G0…	K00031+K00036+K00036+K00036+K00036+K00036+K00383+K00432+K00432+K00432+K00432+K00432+K00432+K00432+K00432+K00434+K00434+K00434+K00434+K00434+K00434+K00434+K00434+K00434+K00434+K00797+K00797+K00799+K00799+K00799+K00799+K00799+K00799+K00799+K00799+K00799+K00799+K00799+K00799+K00799+K00799+K00799+K00799+K00799+K00799+K00799+K00799+K00799+K00799+K00799+K00799+K00799+K00799+K00799+K00799+K00799+K00799+…	https:\\www.genome.jp\dbget-bin\www_bget?map00480
Fatty acid elongation	ko00062	45 out of 6028 0.746516257465163%	152 out of 32833 0.462948862424999%	0.000494251	0.0682067	BnaA01G0177200ZS;BnaC01G0227100ZS;BnaA07G0102200ZS;BnaC07G0154300ZS;novel.3403;BnaA02G0102800ZS;BnaC08G0422900ZS;BnaC08G0450600ZS;BnaA01G0004400ZS;BnaA01G0022000ZS;BnaA04G0173100ZS;BnaA05G0012000ZS;BnaA06G0045100ZS;BnaA06G0135600ZS;BnaA06G0136500ZS;BnaA06G0312500ZS;BnaA07G0020300ZS;BnaA07G0037000ZS;BnaA07G0037100ZS;BnaA07G0137900ZS;BnaA07G0275100ZS;BnaA08G0301900ZS;BnaA09G0437300ZS;BnaA09G0572100…	K01074+K01074+K10251+K10251+K10251+K10703+K15397+K15397+K15397+K15397+K15397+K15397+K15397+K15397+K15397+K15397+K15397+K15397+K15397+K15397+K15397+K15397+K15397+K15397+K15397+K15397+K15397+K15397+K15397+K15397+K15397+K15397+K15397+K15397+K15397+K15397+K15397+K15397+K15397+K15397+K15397+K15397+K15397+K15397+K15397	https:\\www.genome.jp\dbget-bin\www_bget?map00062
ABC transporters	ko02010	90 out of 6028 1.49303251493033%	356 out of 32833 1.08427496725855%	0.00068338	0.0943065	BnaA01G0227000ZS;BnaA06G0261200ZS;BnaC03G0575300ZS;BnaA07G0266700ZS;BnaC06G0299800ZS;BnaC08G0476000ZS;BnaC09G0026900ZS;Bnascaffold0024G0000200ZS;BnaA01G0045000ZS;BnaA01G0148700ZS;BnaA01G0154600ZS;BnaA02G0282300ZS;BnaA03G0445100ZS;BnaA03G0485100ZS;BnaA04G0236900ZS;BnaA04G0296500ZS;BnaA05G0008100ZS;BnaA05G0008800ZS;BnaA06G0368200ZS;BnaA08G0173300ZS;BnaA08G0321900ZS;BnaA09G0426500ZS;BnaA09G0427600ZS…	K05643+K05643+K05643+K05656+K05656+K05658+K05658+K05658+K05658+K05658+K05658+K05658+K05658+K05658+K05658+K05658+K05658+K05658+K05658+K05658+K05658+K05658+K05658+K05658+K05658+K05658+K05658+K05658+K05658+K05658+K05658+K05658+K05658+K05658+K05658+K05658+K05658+K05658+K05665+K05665+K05665+K05665+K05665+K05666+K05666+K05666+K05677+K05677+K05681+K05681+K05681+K05681+K05681+K05681+K05681+K05681+K05681+…	https:\\www.genome.jp\dbget-bin\www_bget?map02010
Circadian rhythm - plant	ko04712	102 out of 6028 1.69210351692104%	414 out of 32833 1.26092650686809%	0.000822044	0.113442	novel.4083;novel.5122;novel.5805;novel.10077;novel.1084;BnaA01G0424700ZS;BnaA02G0417000ZS;BnaA04G0266600ZS;BnaA05G0453300ZS;BnaA07G0225700ZS;BnaC01G0063000ZS;BnaC04G0029100ZS;BnaC04G0583700ZS;BnaC05G0511400ZS;BnaC06G0458300ZS;BnaC07G0256800ZS;BnaC09G0311500ZS;BnaA09G0264500ZS;BnaA10G0025800ZS;BnaC05G0027100ZS;BnaC08G0524800ZS;BnaA09G0661700ZS;BnaA03G0367100ZS;BnaA03G0367200ZS;BnaC03G0448200ZS;Bna…	K00660+K00660+K00660+K00660+K00660+K03097+K03097+K03097+K03097+K03097+K03097+K03097+K03097+K03097+K03097+K03115+K12118+K12118+K12119+K12119+K12120+K12120+K12125+K12125+K12125+K12126+K12126+K12126+K12126+K12126+K12126+K12126+K12126+K12126+K12126+K12126+K12127+K12127+K12129+K12129+K12129+K12129+K12130+K12130+K12130+K12130+K12130+K12130+K12133+K12133+K12133+K12133+K12135+K12135+K12135+K12135+K12135+…	https:\\www.genome.jp\dbget-bin\www_bget?map04712
Biosynthesis of cofactors	ko01240	281 out of 6028 4.66157929661579%	1308 out of 32833 3.98379678981513%	0.00191758	0.264626	novel.5915;novel.1192;novel.1193;BnaA02G0059400ZS;BnaC06G0160700ZS;BnaA08G0222600ZS;BnaA08G0289300ZS;BnaA10G0189700ZS;BnaC05G0554900ZS;BnaA02G0040600ZS;BnaA05G0011700ZS;BnaA05G0011800ZS;BnaA05G0011900ZS;BnaC04G0012200ZS;BnaC04G0012300ZS;BnaC04G0012400ZS;novel.5240;BnaC08G0284400ZS;BnaA01G0039400ZS;BnaA03G0554200ZS;BnaA05G0389400ZS;BnaA06G0170700ZS;BnaA08G0182200ZS;BnaA08G0235200ZS;BnaC01G0027700Z…	K00002+K00002+K00002+K00012+K00012+K00059+K00059+K00059+K00059+K00103+K00103+K00103+K00103+K00103+K00103+K00103+K00103+K00128+K00128+K00128+K00128+K00128+K00128+K00128+K00128+K00128+K00128+K00128+K00128+K00225+K00228+K00228+K00228+K00228+K00231+K00231+K00231+K00231+K00275+K00275+K00275+K00288+K00288+K00382+K00382+K00382+K00457+K00457+K00457+K00600+K00600+K00600+K00600+K00600+K00600+K00600+K00600+…	https:\\www.genome.jp\dbget-bin\www_bget?map01240
Alanine, aspartate and glutamate metabolism	ko00250	73 out of 6028 1.21101526211015%	291 out of 32833 0.88630341424786%	0.00254411	0.351087	BnaA01G0405900ZS;BnaA10G0190000ZS;BnaC01G0508900ZS;BnaC02G0027900ZS;BnaC03G0150600ZS;BnaC02G0533200ZS;BnaA07G0036400ZS;BnaC06G0290200ZS;novel.6774;BnaA02G0299800ZS;BnaC01G0007500ZS;BnaC02G0408900ZS;BnaC03G0216700ZS;BnaC03G0379900ZS;novel.1320;BnaC09G0104800ZS;BnaA03G0390800ZS;BnaA09G0104000ZS;BnaC03G0483800ZS;BnaC09G0256000ZS;BnaC09G0491600ZS;BnaA03G0073800ZS;BnaA10G0195700ZS;BnaC02G0431900ZS;Bna…	K00261+K00261+K00261+K00261+K00264+K00294+K00764+K00814+K00814+K00827+K00827+K00827+K00827+K00827+K00827+K00830+K00830+K00830+K00830+K01580+K01580+K01580+K01580+K01580+K01580+K01915+K01915+K01915+K01915+K01915+K01915+K01915+K01915+K01915+K01915+K01915+K01915+K01915+K01915+K01915+K01915+K01915+K01939+K01939+K01953+K01953+K01953+K01953+K01953+K01953+K13051+K13051+K13051+K13051+K13051+K13566+K13566+…	https:\\www.genome.jp\dbget-bin\www_bget?map00250
Glycosphingolipid biosynthesis - ganglio series	ko00604	42 out of 6028 0.696748506967485%	153 out of 32833 0.465994578625164%	0.00362889	0.500787	BnaC08G0376700ZS;BnaC09G0444500ZS;BnaA01G0023300ZS;BnaA01G0233800ZS;BnaA01G0357700ZS;BnaA02G0095900ZS;BnaA02G0121300ZS;BnaA02G0320500ZS;BnaA03G0114000ZS;BnaA05G0413000ZS;BnaA06G0049200ZS;BnaA06G0289000ZS;BnaA06G0404200ZS;BnaA06G0404500ZS;BnaA07G0200400ZS;BnaA07G0257500ZS;BnaA07G0276600ZS;BnaA09G0219500ZS;BnaA09G0530900ZS;BnaA09G0632500ZS;BnaA09G0708200ZS;BnaC01G0199200ZS;BnaC01G0300700ZS;BnaC01G0…	K12309+K12309+K12309+K12309+K12309+K12309+K12309+K12309+K12309+K12309+K12309+K12309+K12309+K12309+K12309+K12309+K12309+K12309+K12309+K12309+K12309+K12309+K12309+K12309+K12309+K12309+K12309+K12309+K12309+K12309+K12309+K12309+K12309+K12309+K12309+K12309+K12309+K12309+K12309+K12309+K12373+K12373	https:\\www.genome.jp\dbget-bin\www_bget?map00604
Biosynthesis of amino acids	ko01230	273 out of 6028 4.52886529528865%	1288 out of 32833 3.92288246581184%	0.00458503	0.632734	BnaC06G0213200ZS;BnaA06G0013000ZS;BnaC06G0076400ZS;BnaC06G0080600ZS;BnaC06G0133500ZS;BnaA01G0039900ZS;BnaA03G0358500ZS;BnaA03G0543100ZS;BnaA08G0136800ZS;BnaA08G0260300ZS;BnaC01G0045700ZS;BnaC03G0436800ZS;BnaC03G0747700ZS;BnaC07G0519100ZS;BnaA06G0098000ZS;BnaA02G0238000ZS;BnaA07G0230600ZS;BnaA09G0640500ZS;BnaC02G0319900ZS;BnaC05G0135800ZS;BnaC06G0249000ZS;BnaC03G0150600ZS;BnaA03G0060400ZS;BnaC04G0…	K00031+K00053+K00053+K00053+K00053+K00058+K00058+K00058+K00058+K00058+K00058+K00058+K00058+K00058+K00133+K00134+K00134+K00134+K00134+K00134+K00134+K00264+K00286+K00286+K00549+K00549+K00549+K00600+K00600+K00600+K00600+K00600+K00600+K00600+K00600+K00615+K00615+K00615+K00615+K00615+K00615+K00616+K00616+K00616+K00616+K00620+K00640+K00640+K00641+K00641+K00641+K00765+K00765+K00765+K00765+K00766+K00789+…	https:\\www.genome.jp\dbget-bin\www_bget?map01230
Tropane, piperidine and pyridine alkaloid biosynthesis	ko00960	54 out of 6028 0.895819508958195%	215 out of 32833 0.654828983035361%	0.00822717	1	BnaA01G0200500ZS;BnaA02G0263300ZS;BnaA02G0263500ZS;BnaA04G0296800ZS;BnaA08G0083500ZS;BnaA08G0083600ZS;BnaC02G0357300ZS;BnaC02G0357600ZS;BnaC03G0801200ZS;BnaC04G0613900ZS;BnaC08G0458300ZS;BnaA03G0238000ZS;BnaA03G0473600ZS;BnaA05G0144400ZS;BnaA09G0578100ZS;BnaA09G0604200ZS;BnaC02G0171200ZS;BnaC06G0151600ZS;BnaC07G0451900ZS;novel.1470;novel.8853;BnaC09G0207000ZS;BnaC09G0587500ZS;BnaA02G0159800ZS;Bna…	K00276+K00276+K00276+K00276+K00276+K00276+K00276+K00276+K00276+K00276+K00815+K00815+K00815+K00815+K00815+K00815+K00815+K00815+K00815+K00815+K00815+K08081+K08081+K08081+K08081+K08081+K08081+K08081+K08081+K08081+K08081+K08081+K08081+K08081+K08081+K08081+K08081+K08081+K08081+K08081+K08081+K08081+K08081+K08081+K08081+K08081+K08081+K14454+K14454+K14454+K14454+K14454+K14454+K14455	https:\\www.genome.jp\dbget-bin\www_bget?map00960
Arginine biosynthesis	ko00220	44 out of 6028 0.72992700729927%	176 out of 32833 0.536046051228946%	0.0170526	1	BnaA01G0405900ZS;BnaA10G0190000ZS;BnaC01G0508900ZS;BnaC02G0027900ZS;novel.8622;BnaC06G0290200ZS;novel.6774;BnaA07G0387600ZS;BnaC09G0498800ZS;BnaA01G0331500ZS;BnaA03G0351300ZS;BnaA04G0089100ZS;BnaA04G0089200ZS;BnaA04G0096800ZS;BnaA07G0182800ZS;BnaA08G0077600ZS;BnaA10G0200900ZS;BnaC01G0409900ZS;BnaC02G0204200ZS;BnaC03G0426200ZS;BnaC04G0369400ZS;BnaC04G0378100ZS;BnaC04G0386000ZS;BnaC06G0181200ZS;Bna…	K00261+K00261+K00261+K00261+K00620+K00814+K00814+K00818+K01915+K01915+K01915+K01915+K01915+K01915+K01915+K01915+K01915+K01915+K01915+K01915+K01915+K01915+K01915+K01915+K01915+K13427+K13427+K13427+K13427+K14272+K14272+K14272+K14272+K14272+K14272+K14272+K14454+K14454+K14454+K14454+K14454+K14454+K14455+K14682	https:\\www.genome.jp\dbget-bin\www_bget?map00220
Nicotinate and nicotinamide metabolism	ko00760	34 out of 6028 0.564034505640345%	130 out of 32833 0.395943106021381%	0.017336	1	BnaA06G0153700ZS;BnaC05G0187100ZS;BnaA07G0247600ZS;BnaC02G0489700ZS;BnaC09G0476100ZS;BnaA10G0184800ZS;BnaC04G0102100ZS;BnaC08G0018600ZS;BnaC08G0352200ZS;BnaC08G0406900ZS;BnaA01G0076300ZS;BnaA01G0076400ZS;BnaA03G0511800ZS;BnaA05G0015100ZS;BnaA07G0217300ZS;BnaA08G0287300ZS;BnaA09G0510700ZS;BnaC01G0091800ZS;BnaC01G0091900ZS;BnaC03G0778100ZS;BnaC04G0015500ZS;BnaC04G0315600ZS;novel.4159;novel.8160;Bna…	K00858+K00858+K01081+K01081+K01240+K01240+K01240+K01240+K01513+K01513+K01513+K01513+K01513+K01513+K01513+K01513+K01513+K01513+K01513+K01513+K01513+K01513+K01513+K01513+K03517+K03517+K03517+K03517+K03787+K03787+K03787+K03787+K11414+K11414	https:\\www.genome.jp\dbget-bin\www_bget?map00760
Peroxisome	ko04146	97 out of 6028 1.60915726609157%	435 out of 32833 1.32488654707154%	0.020879	1	BnaC06G0213200ZS;novel.9441;BnaC03G0198000ZS;BnaA04G0163200ZS;BnaC09G0104800ZS;BnaA03G0390800ZS;BnaA09G0104000ZS;BnaC03G0483800ZS;BnaA02G0371900ZS;BnaC02G0498100ZS;BnaA05G0351700ZS;BnaC04G0210400ZS;BnaC09G0149500ZS;BnaA03G0376800ZS;BnaA04G0054300ZS;BnaA04G0297500ZS;BnaA05G0006100ZS;BnaA05G0470300ZS;BnaA06G0348800ZS;BnaC03G0461600ZS;BnaC04G0007500ZS;BnaC04G0356100ZS;BnaC04G0614600ZS;BnaC08G0260800…	K00031+K00106+K00232+K00306+K00830+K00830+K00830+K00830+K00869+K00869+K01578+K01640+K01897+K01897+K01897+K01897+K01897+K01897+K01897+K01897+K01897+K01897+K01897+K03781+K03781+K03781+K03781+K03781+K03781+K03781+K03781+K03781+K03781+K03781+K03781+K04564+K04564+K04564+K04564+K04564+K04564+K04564+K04564+K04564+K04565+K04565+K04565+K05677+K05677+K08726+K08726+K08726+K08726+K08726+K11147+K11147+K11517+…	https:\\www.genome.jp\dbget-bin\www_bget?map04146
Isoquinoline alkaloid biosynthesis	ko00950	54 out of 6028 0.895819508958195%	227 out of 32833 0.691377577437334%	0.0235583	1	BnaA01G0200500ZS;BnaA02G0263300ZS;BnaA02G0263500ZS;BnaA04G0296800ZS;BnaA08G0083500ZS;BnaA08G0083600ZS;BnaC02G0357300ZS;BnaC02G0357600ZS;BnaC03G0801200ZS;BnaC04G0613900ZS;BnaC08G0458300ZS;BnaA03G0238000ZS;BnaA03G0473600ZS;BnaA05G0144400ZS;BnaA09G0578100ZS;BnaA09G0604200ZS;BnaC02G0171200ZS;BnaC06G0151600ZS;BnaC07G0451900ZS;novel.1470;novel.8853;BnaA01G0083700ZS;BnaC01G0102000ZS;BnaA07G0003700ZS;Bna…	K00276+K00276+K00276+K00276+K00276+K00276+K00276+K00276+K00276+K00276+K00815+K00815+K00815+K00815+K00815+K00815+K00815+K00815+K00815+K00815+K00815+K01592+K01592+K01593+K01742+K01742+K01742+K01742+K01742+K01742+K01742+K01742+K01742+K01742+K01742+K01742+K01742+K01742+K01742+K01742+K01742+K01742+K13384+K13384+K14454+K14454+K14454+K14454+K14454+K14454+K14455+K14975+K22097+K22097	https:\\www.genome.jp\dbget-bin\www_bget?map00950
Galactose metabolism	ko00052	121 out of 6028 2.00729927007299%	562 out of 32833 1.71169250449243%	0.0302958	1	BnaA10G0056100ZS;BnaC06G0022700ZS;novel.9541;BnaA01G0050200ZS;BnaA01G0079500ZS;BnaA01G0157600ZS;BnaA03G0115300ZS;BnaA03G0175100ZS;BnaA03G0411300ZS;BnaA06G0138600ZS;BnaA06G0138900ZS;BnaA08G0214700ZS;BnaA09G0404100ZS;BnaA09G0492500ZS;BnaC01G0058900ZS;BnaC01G0096300ZS;BnaC01G0200700ZS;BnaC03G0133500ZS;BnaC03G0203900ZS;BnaC03G0649900ZS;BnaC04G0132600ZS;BnaC05G0167300ZS;BnaC05G0167600ZS;BnaC05G0268800…	K00844+K00844+K00844+K00850+K00850+K00850+K00850+K00850+K00850+K00850+K00850+K00850+K00850+K00850+K00850+K00850+K00850+K00850+K00850+K00850+K00850+K00850+K00850+K00850+K00850+K00850+K00850+K00963+K00963+K00963+K00963+K00963+K00963+K01193+K01193+K01193+K01193+K01193+K01193+K01193+K01193+K01193+K01193+K01193+K01193+K01193+K01193+K01193+K01193+K01193+K01193+K01784+K01784+K01784+K01784+K01784+K01784+…	https:\\www.genome.jp\dbget-bin\www_bget?map00052
Folate biosynthesis	ko00790	32 out of 6028 0.53085600530856%	129 out of 32833 0.392897389821216%	0.041164	1	BnaA09G0544400ZS;BnaA01G0386200ZS;BnaA02G0362800ZS;BnaA05G0459900ZS;BnaC01G0492400ZS;BnaC02G0487400ZS;BnaA01G0371800ZS;BnaA05G0430900ZS;BnaA03G0141300ZS;BnaC03G0163600ZS;BnaC08G0355900ZS;BnaA09G0513800ZS;BnaC01G0479000ZS;BnaC03G0026600ZS;BnaC08G0444700ZS;BnaA02G0103000ZS;BnaA09G0087700ZS;BnaA09G0592700ZS;BnaC02G0124900ZS;BnaC03G0533100ZS;BnaC09G0227700ZS;BnaC09G0227800ZS;BnaA01G0076600ZS;BnaA01G0…	K00079+K01495+K01495+K01495+K01495+K01495+K01633+K01633+K01724+K01724+K01930+K01930+K01930+K01930+K14652+K14652+K14652+K14652+K14652+K14652+K15631+K15631+K15631+K15631+K15631+K15631+K15631+K15631+K15631+K15631+K18482+K20457	https:\\www.genome.jp\dbget-bin\www_bget?map00790
Pentose and glucuronate interconversions	ko00040	200 out of 6028 3.3178500331785%	979 out of 32833 2.98175615996101%	0.0502476	1	novel.5915;novel.1192;novel.1193;BnaC09G0341100ZS;BnaA10G0089600ZS;BnaC08G0019700ZS;BnaC08G0019800ZS;BnaA02G0059400ZS;BnaC06G0160700ZS;novel.7968;novel.2400;BnaA03G0517300ZS;BnaA03G0073600ZS;BnaA09G0536500ZS;BnaC01G0505700ZS;BnaC03G0083900ZS;BnaC04G0517800ZS;novel.5952;BnaC08G0231500ZS;BnaC08G0416300ZS;BnaC08G0512700ZS;BnaC09G0168000ZS;BnaC09G0254700ZS;BnaC09G0285100ZS;BnaC09G0335600ZS;BnaC09G046…	K00002+K00002+K00002+K00008+K00008+K00008+K00008+K00012+K00012+K00078+K00078+K00875+K00963+K00963+K00963+K00963+K00963+K00963+K01051+K01051+K01051+K01051+K01051+K01051+K01051+K01051+K01051+K01051+K01051+K01051+K01051+K01051+K01051+K01051+K01051+K01051+K01051+K01051+K01051+K01051+K01051+K01051+K01051+K01051+K01051+K01051+K01051+K01051+K01051+K01051+K01051+K01051+K01051+K01051+K01051+K01051+K01051+…	https:\\www.genome.jp\dbget-bin\www_bget?map00040
[truncated: 89 more rows]

## Sheet: Sheet8
#KEGG_pathway	ko_id	Cluster_frequency	Genome_frequency	P-value	Corrected_P-value	GeneID	KEGG Orthology	hyperlink
[truncated: 139 more rows]
